# Supplementary material
Source: publisher figshare collection journal article supplement (https://acs.figshare.com/ndownloader/files/3730588)
Supplement: Supplementary file 1 [file 3730588]

 
data_dlc1503 
  
_audit_creation_method            'SHELXL-2014/7' 
_shelx_SHELXL_version_number      '2014/7' 
_chemical_name_systematic
 '5-methoxy-3-methyl-2-(phenylselanyl)phenol'
_chemical_name_common             ? 
_chemical_melting_point           ? 
_chemical_formula_moiety          'C14 H14 O2 Se' 
_chemical_formula_sum 
 'C14 H14 O2 Se' 
_chemical_formula_weight          293.21 
  
loop_ 
 _atom_type_symbol 
 _atom_type_description 
 _atom_type_scat_dispersion_real 
 _atom_type_scat_dispersion_imag 
 _atom_type_scat_source 
 'C'  'C'   0.0033   0.0016 
 'International Tables Vol C Tables 4.2.6.8 and 6.1.1.4' 
 'H'  'H'   0.0000   0.0000 
 'International Tables Vol C Tables 4.2.6.8 and 6.1.1.4' 
 'O'  'O'   0.0106   0.0060 
 'International Tables Vol C Tables 4.2.6.8 and 6.1.1.4' 
 'Se'  'Se'  -0.0929   2.2259 
 'International Tables Vol C Tables 4.2.6.8 and 6.1.1.4' 
  
_space_group_crystal_system       monoclinic 
_space_group_IT_number            14 
_space_group_name_H-M_alt         'P 21/c' 
_space_group_name_Hall            '-P 2ybc' 
  
_shelx_space_group_comment 
; 
The symmetry employed for this shelxl refinement is uniquely defined 
by the following loop, which should always be used as a source of 
symmetry information in preference to the above space-group names. 
They are only intended as comments. 
; 
  
loop_ 
 _space_group_symop_operation_xyz 
 'x, y, z' 
 '-x, y+1/2, -z+1/2' 
 '-x, -y, -z' 
 'x, -y-1/2, z-1/2' 
  
_cell_length_a                    7.4575(5) 
_cell_length_b                    18.2889(11) 
_cell_length_c                    9.1660(6) 
_cell_angle_alpha                 90 
_cell_angle_beta                  91.2782(9) 
_cell_angle_gamma                 90 
_cell_volume                      1249.83(14) 
_cell_formula_units_Z             4 
_cell_measurement_temperature     193(2) 
_cell_measurement_reflns_used     4885 
_cell_measurement_theta_min       2.23 
_cell_measurement_theta_max       20.79 
  
_exptl_crystal_description        fragment 
_exptl_crystal_colour             colourless 
_exptl_crystal_density_meas       ? 
_exptl_crystal_density_method     ? 
_exptl_crystal_density_diffrn     1.558 
_exptl_crystal_F_000              592 
_exptl_transmission_factor_min    ? 
_exptl_transmission_factor_max    ? 
_exptl_crystal_size_max           0.199 
_exptl_crystal_size_mid           0.173 
_exptl_crystal_size_min           0.097 
_exptl_absorpt_coefficient_mu     2.991 
_shelx_estimated_absorpt_T_min    0.588 
_shelx_estimated_absorpt_T_max    0.760 
_exptl_absorpt_correction_type    numerical 
_exptl_absorpt_correction_T_min   0.6912 
_exptl_absorpt_correction_T_max   0.8751 
_exptl_absorpt_process_details    'SADABS 2014/5' 
_exptl_absorpt_special_details    ? 
_diffrn_ambient_temperature       193(2) 
_diffrn_radiation_wavelength      0.71073 
_diffrn_radiation_type            MoK\a 
_diffrn_source                    ? 
_diffrn_measurement_device_type   'Bruker APEX-II CCD' 
_diffrn_measurement_method        '\w scans' 
_diffrn_detector_area_resol_mean  ? 
_diffrn_reflns_number             11287 
_diffrn_reflns_av_unetI/netI      0.0259 
_diffrn_reflns_av_R_equivalents   0.0334 
_diffrn_reflns_limit_h_min        -9 
_diffrn_reflns_limit_h_max        9 
_diffrn_reflns_limit_k_min        -23 
_diffrn_reflns_limit_k_max        23 
_diffrn_reflns_limit_l_min        -11 
_diffrn_reflns_limit_l_max        11 
_diffrn_reflns_theta_min          2.227 
_diffrn_reflns_theta_max          27.568 
_diffrn_reflns_theta_full         25.242 
_diffrn_measured_fraction_theta_max   0.999 
_diffrn_measured_fraction_theta_full  1.000 
_diffrn_reflns_Laue_measured_fraction_max    0.999 
_diffrn_reflns_Laue_measured_fraction_full   1.000 
_diffrn_reflns_point_group_measured_fraction_max   0.999 
_diffrn_reflns_point_group_measured_fraction_full  1.000 
_reflns_number_total              2888 
_reflns_number_gt                 2317 
_reflns_threshold_expression      'I > 2\s(I)' 
_reflns_Friedel_coverage          0.000 
_reflns_Friedel_fraction_max      . 
_reflns_Friedel_fraction_full     . 
  
_reflns_special_details 
; 
 Reflections were merged by SHELXL according to the crystal 
 class for the calculation of statistics and refinement. 
  
 _reflns_Friedel_fraction is defined as the number of unique 
 Friedel pairs measured divided by the number that would be 
 possible theoretically, ignoring centric projections and 
 systematic absences. 
; 
  
_computing_data_collection        'Bruker APEX2' 
_computing_cell_refinement        'Bruker SAINT' 
_computing_data_reduction         'Bruker SAINT' 
_computing_structure_solution     'SHELXD (Schneider & Sheldrick, 2002)' 
_computing_structure_refinement 'SHELXL-2014/7 (Sheldrick, 2014)' 
_computing_molecular_graphics     'Bruker SHELXTL' 
_computing_publication_material   'Bruker SHELXTL' 
_refine_special_details           ? 
_refine_ls_structure_factor_coef  Fsqd 
_refine_ls_matrix_type            full 
_refine_ls_weighting_scheme       calc 
_refine_ls_weighting_details 
'w=1/[\s^2^(Fo^2^)+(0.0436P)^2^+1.1447P] where P=(Fo^2^+2Fc^2^)/3' 
_atom_sites_solution_primary      ? 
_atom_sites_solution_secondary    ? 
_atom_sites_solution_hydrogens    mixed 
_refine_ls_hydrogen_treatment     mixed 
_refine_ls_extinction_method      none 
_refine_ls_extinction_coef        . 
_refine_ls_number_reflns          2888 
_refine_ls_number_parameters      159 
_refine_ls_number_restraints      0 
_refine_ls_R_factor_all           0.0486 
_refine_ls_R_factor_gt            0.0358 
_refine_ls_wR_factor_ref          0.0961 
_refine_ls_wR_factor_gt           0.0885 
_refine_ls_goodness_of_fit_ref    1.046 
_refine_ls_restrained_S_all       1.046 
_refine_ls_shift/su_max           0.001 
_refine_ls_shift/su_mean          0.000 
  
loop_ 
 _atom_site_label 
 _atom_site_type_symbol 
 _atom_site_fract_x 
 _atom_site_fract_y 
 _atom_site_fract_z 
 _atom_site_U_iso_or_equiv 
 _atom_site_adp_type 
 _atom_site_occupancy 
 _atom_site_site_symmetry_order 
 _atom_site_calc_flag 
 _atom_site_refinement_flags_posn 
 _atom_site_refinement_flags_adp 
 _atom_site_refinement_flags_occupancy 
 _atom_site_disorder_assembly 
 _atom_site_disorder_group 
Se Se 0.18707(5) 0.47836(2) 0.28681(3) 0.04295(12) Uani 1 1 d . . . . . 
O1 O 0.3625(3) 0.44278(14) -0.0063(3) 0.0486(6) Uani 1 1 d . . . . . 
H1O H 0.384(6) 0.468(2) 0.076(5) 0.068(13) Uiso 1 1 d . . . . . 
O2 O -0.1320(3) 0.32331(11) -0.2421(2) 0.0402(5) Uani 1 1 d . . . . . 
C1 C 0.1882(4) 0.41917(15) -0.0010(3) 0.0338(6) Uani 1 1 d . . . . . 
C2 C 0.0846(4) 0.42724(15) 0.1229(3) 0.0340(6) Uani 1 1 d . . . . . 
C3 C -0.0929(4) 0.40182(16) 0.1197(3) 0.0374(6) Uani 1 1 d . . . . . 
C4 C -0.1598(4) 0.36824(16) -0.0056(3) 0.0363(6) Uani 1 1 d . . . . . 
H4 H -0.2802 0.3513 -0.0086 0.044 Uiso 1 1 calc R U . . . 
C5 C -0.0532(4) 0.35898(14) -0.1271(3) 0.0318(5) Uani 1 1 d . . . . . 
C6 C 0.1208(4) 0.38508(15) -0.1259(3) 0.0328(6) Uani 1 1 d . . . . . 
H6 H 0.1932 0.3798 -0.2092 0.039 Uiso 1 1 calc R U . . . 
C7 C 0.3040(4) 0.39945(15) 0.3902(3) 0.0316(5) Uani 1 1 d . . . . . 
C8 C 0.3131(4) 0.32843(15) 0.3383(3) 0.0372(6) Uani 1 1 d . . . . . 
H8 H 0.2565 0.3157 0.2479 0.045 Uiso 1 1 calc R U . . . 
C9 C 0.4054(4) 0.27596(16) 0.4195(3) 0.0399(6) Uani 1 1 d . . . . . 
H9 H 0.4104 0.2271 0.3849 0.048 Uiso 1 1 calc R U . . . 
C10 C 0.4901(4) 0.29388(16) 0.5499(3) 0.0378(6) Uani 1 1 d . . . . . 
H10 H 0.5548 0.2577 0.6038 0.045 Uiso 1 1 calc R U . . . 
C11 C 0.4805(4) 0.36483(16) 0.6019(3) 0.0371(6) Uani 1 1 d . . . . . 
H11 H 0.5387 0.3774 0.6917 0.045 Uiso 1 1 calc R U . . . 
C12 C 0.3863(4) 0.41740(15) 0.5234(3) 0.0327(6) Uani 1 1 d . . . . . 
H12 H 0.3778 0.4658 0.5603 0.039 Uiso 1 1 calc R U . . . 
C13 C -0.2139(5) 0.4106(2) 0.2477(4) 0.0554(9) Uani 1 1 d . . . . . 
H13A H -0.3303 0.3879 0.2251 0.067 Uiso 1 1 calc R U . . . 
H13B H -0.2311 0.4628 0.2677 0.067 Uiso 1 1 calc R U . . . 
H13C H -0.1592 0.3869 0.3336 0.067 Uiso 1 1 calc R U . . . 
C14 C -0.0319(4) 0.31799(18) -0.3736(3) 0.0448(7) Uani 1 1 d . . . . . 
H14A H -0.1026 0.2913 -0.4476 0.054 Uiso 1 1 calc R U . . . 
H14B H -0.0054 0.3672 -0.4096 0.054 Uiso 1 1 calc R U . . . 
H14C H 0.0806 0.2918 -0.3533 0.054 Uiso 1 1 calc R U . . . 
  
loop_ 
 _atom_site_aniso_label 
 _atom_site_aniso_U_11 
 _atom_site_aniso_U_22 
 _atom_site_aniso_U_33 
 _atom_site_aniso_U_23 
 _atom_site_aniso_U_13 
 _atom_site_aniso_U_12 
Se 0.0614(2) 0.03239(17) 0.03449(18) -0.00223(11) -0.01106(13) 0.00697(13) 
O1 0.0314(11) 0.0681(16) 0.0463(13) -0.0066(12) -0.0023(9) -0.0122(10) 
O2 0.0372(11) 0.0466(12) 0.0367(11) -0.0038(9) -0.0051(8) -0.0070(9) 
C1 0.0310(13) 0.0343(14) 0.0359(14) 0.0024(11) -0.0055(11) 0.0003(11) 
C2 0.0389(14) 0.0341(14) 0.0286(13) 0.0007(11) -0.0059(11) 0.0042(11) 
C3 0.0397(15) 0.0396(15) 0.0330(14) 0.0091(12) 0.0027(12) 0.0051(12) 
C4 0.0312(13) 0.0395(15) 0.0379(15) 0.0070(12) -0.0015(11) -0.0033(11) 
C5 0.0326(13) 0.0313(13) 0.0312(13) 0.0044(10) -0.0053(10) 0.0008(10) 
C6 0.0299(13) 0.0400(14) 0.0285(13) 0.0011(11) -0.0007(10) 0.0028(11) 
C7 0.0346(14) 0.0336(14) 0.0266(13) 0.0012(10) 0.0017(10) -0.0005(11) 
C8 0.0446(16) 0.0357(14) 0.0310(14) -0.0038(11) -0.0060(12) -0.0005(12) 
C9 0.0471(17) 0.0306(14) 0.0419(16) -0.0014(12) -0.0019(13) 0.0009(12) 
C10 0.0372(15) 0.0409(15) 0.0352(14) 0.0062(12) 0.0008(12) 0.0034(12) 
C11 0.0367(15) 0.0457(16) 0.0288(13) -0.0001(12) -0.0029(11) -0.0042(12) 
C12 0.0373(14) 0.0326(13) 0.0283(13) -0.0032(10) 0.0022(11) -0.0029(11) 
C13 0.052(2) 0.074(2) 0.0404(18) 0.0021(16) 0.0125(15) 0.0023(17) 
C14 0.0445(17) 0.0526(18) 0.0372(16) -0.0115(14) -0.0043(13) 0.0011(14) 
  
_geom_special_details 
; 
 All esds (except the esd in the dihedral angle between two l.s. planes) 
 are estimated using the full covariance matrix.  The cell esds are taken 
 into account individually in the estimation of esds in distances, angles 
 and torsion angles; correlations between esds in cell parameters are only 
 used when they are defined by crystal symmetry.  An approximate (isotropic) 
 treatment of cell esds is used for estimating esds involving l.s. planes. 
; 
  
loop_ 
 _geom_bond_atom_site_label_1 
 _geom_bond_atom_site_label_2 
 _geom_bond_distance 
 _geom_bond_site_symmetry_2 
 _geom_bond_publ_flag 
Se C2 1.914(3) . ? 
Se C7 1.925(3) . ? 
O1 C1 1.372(3) . ? 
O2 C5 1.362(3) . ? 
O2 C14 1.434(4) . ? 
C1 C6 1.387(4) . ? 
C1 C2 1.396(4) . ? 
C2 C3 1.403(4) . ? 
C3 C4 1.385(4) . ? 
C3 C13 1.504(4) . ? 
C4 C5 1.394(4) . ? 
C5 C6 1.382(4) . ? 
C7 C8 1.386(4) . ? 
C7 C12 1.393(4) . ? 
C8 C9 1.388(4) . ? 
C9 C10 1.379(4) . ? 
C10 C11 1.385(4) . ? 
C11 C12 1.383(4) . ? 
  
loop_ 
 _geom_angle_atom_site_label_1 
 _geom_angle_atom_site_label_2 
 _geom_angle_atom_site_label_3 
 _geom_angle 
 _geom_angle_site_symmetry_1 
 _geom_angle_site_symmetry_3 
 _geom_angle_publ_flag 
C2 Se C7 100.89(11) . . ? 
C5 O2 C14 117.3(2) . . ? 
O1 C1 C6 116.0(3) . . ? 
O1 C1 C2 122.5(3) . . ? 
C6 C1 C2 121.5(3) . . ? 
C1 C2 C3 119.1(2) . . ? 
C1 C2 Se 118.1(2) . . ? 
C3 C2 Se 122.6(2) . . ? 
C4 C3 C2 119.1(3) . . ? 
C4 C3 C13 118.9(3) . . ? 
C2 C3 C13 122.0(3) . . ? 
C3 C4 C5 121.0(3) . . ? 
O2 C5 C6 124.1(3) . . ? 
O2 C5 C4 115.7(2) . . ? 
C6 C5 C4 120.2(3) . . ? 
C5 C6 C1 119.0(3) . . ? 
C8 C7 C12 119.9(2) . . ? 
C8 C7 Se 124.0(2) . . ? 
C12 C7 Se 116.1(2) . . ? 
C7 C8 C9 119.4(3) . . ? 
C10 C9 C8 120.9(3) . . ? 
C9 C10 C11 119.7(3) . . ? 
C12 C11 C10 120.1(3) . . ? 
C11 C12 C7 120.0(3) . . ? 
  
loop_ 
 _geom_torsion_atom_site_label_1 
 _geom_torsion_atom_site_label_2 
 _geom_torsion_atom_site_label_3 
 _geom_torsion_atom_site_label_4 
 _geom_torsion 
 _geom_torsion_site_symmetry_1 
 _geom_torsion_site_symmetry_2 
 _geom_torsion_site_symmetry_3 
 _geom_torsion_site_symmetry_4 
 _geom_torsion_publ_flag 
O1 C1 C2 C3 179.8(3) . . . . ? 
C6 C1 C2 C3 -1.5(4) . . . . ? 
O1 C1 C2 Se 3.7(4) . . . . ? 
C6 C1 C2 Se -177.7(2) . . . . ? 
C7 Se C2 C1 -88.6(2) . . . . ? 
C7 Se C2 C3 95.4(2) . . . . ? 
C1 C2 C3 C4 1.1(4) . . . . ? 
Se C2 C3 C4 177.1(2) . . . . ? 
C1 C2 C3 C13 -178.2(3) . . . . ? 
Se C2 C3 C13 -2.3(4) . . . . ? 
C2 C3 C4 C5 0.5(4) . . . . ? 
C13 C3 C4 C5 179.8(3) . . . . ? 
C14 O2 C5 C6 -5.2(4) . . . . ? 
C14 O2 C5 C4 175.0(3) . . . . ? 
C3 C4 C5 O2 178.1(2) . . . . ? 
C3 C4 C5 C6 -1.7(4) . . . . ? 
O2 C5 C6 C1 -178.5(2) . . . . ? 
C4 C5 C6 C1 1.3(4) . . . . ? 
O1 C1 C6 C5 179.0(2) . . . . ? 
C2 C1 C6 C5 0.3(4) . . . . ? 
C2 Se C7 C8 4.9(3) . . . . ? 
C2 Se C7 C12 -176.5(2) . . . . ? 
C12 C7 C8 C9 -0.4(4) . . . . ? 
Se C7 C8 C9 178.1(2) . . . . ? 
C7 C8 C9 C10 -0.9(5) . . . . ? 
C8 C9 C10 C11 1.1(5) . . . . ? 
C9 C10 C11 C12 0.0(4) . . . . ? 
C10 C11 C12 C7 -1.3(4) . . . . ? 
C8 C7 C12 C11 1.6(4) . . . . ? 
Se C7 C12 C11 -177.1(2) . . . . ? 
  
loop_ 
 _geom_hbond_atom_site_label_D 
 _geom_hbond_atom_site_label_H 
 _geom_hbond_atom_site_label_A 
 _geom_hbond_distance_DH 
 _geom_hbond_distance_HA 
 _geom_hbond_distance_DA 
 _geom_hbond_angle_DHA 
 _geom_hbond_site_symmetry_A 
O1 H1O Se  0.89(5) 2.46(4) 3.084(2) 127(3) . 
  
_refine_diff_density_max    1.623 
_refine_diff_density_min   -0.761 
_refine_diff_density_rms    0.071 
  
_shelx_res_file 
; 
  
    dlc1503.res created by SHELXL-2014/7 
  
  
TITL dlc1503 in P2(1)/c 
CELL 0.71073 7.4575 18.2889 9.1660 90.0 91.2782 90.0 
ZERR    4.00 0.0005  0.0011 0.0006  0.0  0.0009  0.0 
LATT 1 
SYMM -X, 0.5+Y, 0.5-Z 
SFAC C  H  O SE 
UNIT 56 56 8 4 
SIZE 0.097 0.173 0.199 
TEMP -80 
L.S. 4 
ACTA 
CONF 2.0 
HTAB O1 SE 
WGHT    0.043600    1.144700 
FVAR       0.16157 
SE    4    0.187069    0.478357    0.286810    11.00000    0.06142    0.03239 = 
         0.03449   -0.00223   -0.01106    0.00697 
O1    3    0.362508    0.442780   -0.006330    11.00000    0.03136    0.06807 = 
         0.04628   -0.00664   -0.00231   -0.01222 
H1O   2    0.384151    0.467876    0.075665    11.00000    0.06794 
O2    3   -0.131965    0.323313   -0.242146    11.00000    0.03721    0.04658 = 
         0.03669   -0.00376   -0.00512   -0.00698 
C1    1    0.188186    0.419168   -0.001039    11.00000    0.03097    0.03434 = 
         0.03592    0.00239   -0.00551    0.00031 
C2    1    0.084558    0.427243    0.122939    11.00000    0.03891    0.03410 = 
         0.02864    0.00067   -0.00588    0.00424 
C3    1   -0.092938    0.401825    0.119712    11.00000    0.03974    0.03956 = 
         0.03300    0.00910    0.00269    0.00513 
C4    1   -0.159818    0.368241   -0.005551    11.00000    0.03122    0.03954 = 
         0.03789    0.00702   -0.00153   -0.00331 
AFIX  43 
H4    2   -0.280231    0.351258   -0.008635    11.00000   -1.20000 
AFIX   0 
C5    1   -0.053175    0.358979   -0.127146    11.00000    0.03264    0.03127 = 
         0.03121    0.00444   -0.00530    0.00078 
C6    1    0.120815    0.385084   -0.125880    11.00000    0.02990    0.03998 = 
         0.02852    0.00109   -0.00071    0.00278 
AFIX  43 
H6    2    0.193152    0.379765   -0.209227    11.00000   -1.20000 
AFIX   0 
C7    1    0.304030    0.399453    0.390204    11.00000    0.03464    0.03364 = 
         0.02658    0.00122    0.00169   -0.00053 
C8    1    0.313057    0.328425    0.338302    11.00000    0.04458    0.03571 = 
         0.03104   -0.00384   -0.00604   -0.00052 
AFIX  43 
H8    2    0.256521    0.315743    0.247906    11.00000   -1.20000 
AFIX   0 
C9    1    0.405434    0.275956    0.419542    11.00000    0.04713    0.03064 = 
         0.04186   -0.00145   -0.00192    0.00091 
AFIX  43 
H9    2    0.410350    0.227064    0.384857    11.00000   -1.20000 
AFIX   0 
C10   1    0.490144    0.293883    0.549922    11.00000    0.03725    0.04089 = 
         0.03519    0.00617    0.00079    0.00344 
AFIX  43 
H10   2    0.554790    0.257749    0.603811    11.00000   -1.20000 
AFIX   0 
C11   1    0.480494    0.364833    0.601902    11.00000    0.03671    0.04572 = 
         0.02885   -0.00010   -0.00288   -0.00418 
AFIX  43 
H11   2    0.538673    0.377425    0.691679    11.00000   -1.20000 
AFIX   0 
C12   1    0.386338    0.417403    0.523394    11.00000    0.03729    0.03264 = 
         0.02835   -0.00318    0.00223   -0.00293 
AFIX  43 
H12   2    0.377773    0.465786    0.560301    11.00000   -1.20000 
AFIX   0 
C13   1   -0.213912    0.410617    0.247701    11.00000    0.05245    0.07393 = 
         0.04038    0.00209    0.01250    0.00229 
AFIX 137 
H13A  2   -0.330254    0.387891    0.225103    11.00000   -1.20000 
H13B  2   -0.231107    0.462753    0.267732    11.00000   -1.20000 
H13C  2   -0.159181    0.386934    0.333643    11.00000   -1.20000 
AFIX   0 
C14   1   -0.031926    0.317990   -0.373569    11.00000    0.04447    0.05258 = 
         0.03720   -0.01153   -0.00435    0.00105 
AFIX  33 
H14A  2   -0.102624    0.291309   -0.447584    11.00000   -1.20000 
H14B  2   -0.005409    0.367181   -0.409594    11.00000   -1.20000 
H14C  2    0.080606    0.291845   -0.353323    11.00000   -1.20000 
  
AFIX   0 
HKLF 4 
  
REM  dlc1503 in P2(1)/c 
REM R1 =  0.0358 for    2317 Fo > 4sig(Fo)  and  0.0486 for all    2888 data 
REM    159 parameters refined using      0 restraints 
  
END 
  
WGHT      0.0436      1.1396 
  
REM Highest difference peak  1.623,  deepest hole -0.761,  1-sigma level  0.071 
Q1    1   0.0736  0.4654  0.3162  11.00000  0.05    1.62 
Q2    1   0.1943  0.5598  0.2903  11.00000  0.05    0.54 
Q3    1   0.4352  0.4783  0.1488  11.00000  0.05    0.34 
Q4    1  -0.0024  0.4193  0.1156  11.00000  0.05    0.33 
Q5    1   0.3523  0.5021  0.2308  11.00000  0.05    0.31 
Q6    1   0.3417  0.4073  0.4535  11.00000  0.05    0.30 
Q7    1   0.1361  0.4455  0.1863  11.00000  0.05    0.29 
Q8    1   0.0359  0.3786 -0.1184  11.00000  0.05    0.29 
Q9    1   0.2748  0.4257  0.3462  11.00000  0.05    0.27 
Q10   1  -0.1515  0.4349  0.3276  11.00000  0.05    0.27 
Q11   1   0.1351  0.4187  0.0677  11.00000  0.05    0.26 
Q12   1   0.4690  0.3299  0.5745  11.00000  0.05    0.26 
Q13   1   0.1959  0.4217  0.3395  11.00000  0.05    0.26 
Q14   1   0.1587  0.3786 -0.0582  11.00000  0.05    0.26 
Q15   1  -0.1241  0.4014  0.0520  11.00000  0.05    0.24 
Q16   1  -0.1180  0.3842  0.0617  11.00000  0.05    0.24 
Q17   1  -0.0929  0.3624 -0.0621  11.00000  0.05    0.24 
Q18   1   0.3129  0.5217  0.3256  11.00000  0.05    0.23 
Q19   1  -0.2154  0.3708  0.2593  11.00000  0.05    0.23 
Q20   1   0.4200  0.2840  0.4949  11.00000  0.05    0.22 
; 
_shelx_res_checksum   44613 
  
_shelx_hkl_file 
; 
   0  -9 -11   -0.61    0.66 
  -1  -8 -11    3.38    1.03 
   0  -8 -11    2.81    1.03 
   1  -8 -11    1.13    0.53 
  -2  -7 -11    3.87    1.10 
  -1  -7 -11    0.21    0.67 
   0  -7 -11   -0.65    0.49 
   1  -7 -11    3.82    0.72 
   2  -7 -11   -0.01    0.44 
  -2  -6 -11    0.77    0.75 
  -1  -6 -11    8.44    1.43 
   0  -6 -11    3.21    0.94 
   1  -6 -11    0.41    0.46 
   2  -6 -11    2.33    0.61 
  -2  -5 -11    2.44    0.63 
  -1  -5 -11    0.65    0.47 
   0  -5 -11    4.33    1.00 
   1  -5 -11    3.79    0.71 
   2  -5 -11    1.19    0.55 
   3  -5 -11    0.33    0.49 
  -3  -4 -11    1.03    0.50 
  -2  -4 -11   -0.20    0.38 
  -1  -4 -11    4.08    0.71 
   0  -4 -11    4.19    0.67 
   1  -4 -11    0.15    0.43 
   2  -4 -11    0.11    0.42 
   3  -4 -11   -0.06    0.47 
  -3  -3 -11    0.37    0.46 
  -2  -3 -11   11.82    1.11 
  -1  -3 -11    5.22    0.74 
   0  -3 -11    5.74    0.78 
   1  -3 -11   10.53    0.86 
   2  -3 -11    0.64    0.49 
   3  -3 -11    1.78    0.59 
  -3  -2 -11    1.32    0.55 
  -2  -2 -11    0.17    0.39 
  -1  -2 -11    1.25    0.49 
   0  -2 -11   -0.29    0.36 
   1  -2 -11    0.36    0.42 
   2  -2 -11    0.13    0.34 
   3  -2 -11   -0.40    0.40 
  -3  -1 -11    0.53    0.46 
  -2  -1 -11   21.90    2.14 
  -1  -1 -11    6.25    0.81 
   0  -1 -11    3.11    0.63 
   1  -1 -11    7.92    0.89 
   2  -1 -11   -0.04    0.32 
   3  -1 -11    8.53    0.89 
  -3   0 -11    0.54    0.49 
  -2   0 -11    0.44    0.43 
  -1   0 -11   -0.19    0.36 
   0   0 -11    0.00    0.38 
   1   0 -11   -0.25    0.35 
   2   0 -11    0.05    0.31 
   3   0 -11   -0.48    0.32 
  -3   1 -11   -0.34    0.40 
  -2   1 -11   21.71    1.50 
  -1   1 -11    4.63    0.72 
   0   1 -11    2.68    0.60 
   1   1 -11    6.60    0.84 
   2   1 -11    0.60    0.36 
   3   1 -11    9.80    0.82 
  -3   2 -11    1.86    0.92 
  -2   2 -11    0.94    0.50 
  -1   2 -11    1.05    0.49 
   0   2 -11    0.10    0.41 
   1   2 -11    0.72    0.48 
   2   2 -11    0.57    0.35 
   3   2 -11    0.33    0.37 
  -3   3 -11    0.84    0.87 
  -2   3 -11   10.94    1.09 
  -1   3 -11    6.06    0.80 
   0   3 -11    5.05    0.77 
   1   3 -11    9.94    1.00 
   2   3 -11    0.09    0.39 
   3   3 -11    1.53    0.47 
  -3   4 -11    1.55    0.93 
  -2   4 -11    0.26    0.68 
  -1   4 -11    6.42    0.87 
   0   4 -11    2.97    0.62 
   1   4 -11   -0.07    0.39 
   2   4 -11    0.28    0.47 
   3   4 -11   -0.08    0.36 
  -2   5 -11    2.36    0.95 
  -1   5 -11    1.00    0.77 
   0   5 -11    4.21    0.69 
   1   5 -11    3.66    0.69 
   2   5 -11    0.49    0.50 
   3   5 -11    0.50    0.42 
  -2   6 -11   -0.40    0.66 
  -1   6 -11    7.89    1.41 
   0   6 -11    5.64    0.83 
   1   6 -11    0.24    0.43 
   2   6 -11    1.33    0.55 
  -2   7 -11    2.47    0.96 
  -1   7 -11    0.54    0.77 
   0   7 -11   -0.02    0.73 
   1   7 -11    4.11    0.76 
   2   7 -11    0.75    0.52 
  -1   8 -11    5.34    1.24 
   0   8 -11    2.03    0.99 
   1   8 -11    0.60    0.79 
   0   9 -11    0.34    0.84 
  -1 -12 -10   -0.28    0.44 
   0 -12 -10    0.54    0.46 
   1 -12 -10    0.15    0.45 
   2 -12 -10    0.04    0.36 
  -2 -11 -10   10.02    1.57 
  -1 -11 -10    0.80    0.47 
   0 -11 -10   12.33    1.16 
   1 -11 -10    6.55    0.91 
   2 -11 -10    0.36    0.39 
  -3 -10 -10   -0.13    0.74 
  -2 -10 -10   -0.05    0.68 
  -1 -10 -10    3.99    0.84 
   0 -10 -10   -0.15    0.39 
   1 -10 -10    0.53    0.44 
   2 -10 -10    5.19    0.67 
   3 -10 -10   -0.12    0.34 
  -3  -9 -10    1.54    0.86 
  -2  -9 -10    3.87    1.07 
  -1  -9 -10    0.27    0.61 
   0  -9 -10   19.31    1.39 
   1  -9 -10    9.83    1.03 
   2  -9 -10   -0.22    0.38 
   3  -9 -10    2.27    0.50 
  -3  -8 -10    4.28    1.07 
  -2  -8 -10    0.12    0.63 
  -1  -8 -10    5.83    1.13 
   0  -8 -10    6.09    0.80 
   1  -8 -10    2.53    0.59 
   2  -8 -10    1.46    0.51 
   3  -8 -10    1.40    0.55 
   4  -8 -10    1.72    0.57 
  -4  -7 -10    1.52    0.57 
  -3  -7 -10    7.39    0.81 
  -2  -7 -10   17.28    1.39 
  -1  -7 -10    1.10    0.68 
   0  -7 -10    5.83    0.78 
   1  -7 -10    5.30    0.75 
   2  -7 -10    0.82    0.46 
   3  -7 -10    2.69    0.66 
   4  -7 -10    2.82    0.66 
  -4  -6 -10    2.54    0.63 
  -3  -6 -10    5.84    0.82 
  -2  -6 -10   -0.03    0.36 
  -1  -6 -10    4.26    0.66 
   0  -6 -10   -0.07    0.34 
   1  -6 -10    0.56    0.44 
   2  -6 -10    2.12    0.55 
   3  -6 -10    2.26    0.61 
   4  -6 -10    4.71    0.79 
  -4  -5 -10    4.81    0.77 
  -3  -5 -10    0.27    0.43 
  -2  -5 -10    9.31    0.94 
  -1  -5 -10    7.63    0.83 
   0  -5 -10    0.50    0.31 
   1  -5 -10    6.36    0.80 
   2  -5 -10    0.53    0.42 
   3  -5 -10    1.95    0.57 
   4  -5 -10    0.66    0.47 
   5  -5 -10    0.27    0.51 
  -4  -4 -10    6.24    0.84 
  -3  -4 -10    6.49    0.85 
  -2  -4 -10   -0.11    0.33 
  -1  -4 -10   16.28    1.19 
   0  -4 -10    2.69    0.44 
   1  -4 -10    0.64    0.32 
   2  -4 -10    9.45    0.97 
   3  -4 -10   -0.23    0.34 
   4  -4 -10    1.59    0.59 
   5  -4 -10    2.40    0.69 
  -4  -3 -10    2.17    0.59 
  -3  -3 -10    0.22    0.40 
  -2  -3 -10    2.03    0.54 
  -1  -3 -10    2.91    0.60 
   0  -3 -10    1.27    0.45 
   1  -3 -10    6.40    0.63 
   2  -3 -10    0.52    0.32 
   3  -3 -10    1.19    0.52 
   4  -3 -10    0.12    0.43 
   5  -3 -10    0.27    0.50 
  -5  -2 -10    0.44    0.49 
  -4  -2 -10   10.08    1.02 
  -3  -2 -10   16.37    1.24 
  -2  -2 -10   -0.34    0.34 
  -1  -2 -10   22.59    1.45 
   0  -2 -10   21.67    1.38 
   1  -2 -10    5.24    0.57 
   2  -2 -10    9.22    0.76 
   3  -2 -10    0.99    0.36 
   4  -2 -10    2.20    0.61 
   5  -2 -10    1.74    0.61 
  -5  -1 -10    0.43    0.77 
  -4  -1 -10    0.09    0.44 
  -3  -1 -10    1.49    0.52 
  -2  -1 -10    1.24    0.46 
  -1  -1 -10   -0.21    0.32 
   0  -1 -10    0.12    0.36 
   1  -1 -10    3.77    0.51 
   2  -1 -10   -0.06    0.27 
   3  -1 -10    0.40    0.33 
   4  -1 -10    0.26    0.38 
   5  -1 -10   -0.08    0.48 
  -5   0 -10    2.40    0.97 
  -4   0 -10   10.05    1.02 
  -3   0 -10   22.25    1.48 
  -2   0 -10    0.75    0.42 
  -1   0 -10   14.94    1.17 
   0   0 -10   18.76    1.29 
   1   0 -10    3.67    0.48 
   2   0 -10   18.80    1.06 
   3   0 -10    0.10    0.31 
   4   0 -10    1.03    0.39 
   5   0 -10    3.14    0.74 
  -5   1 -10   -0.31    0.71 
  -4   1 -10    1.02    0.78 
  -3   1 -10    1.50    0.51 
  -2   1 -10    1.39    0.49 
  -1   1 -10    0.16    0.34 
   0   1 -10    0.13    0.34 
   1   1 -10    3.13    0.48 
   2   1 -10    0.39    0.33 
   3   1 -10    0.90    0.39 
   4   1 -10    0.19    0.35 
   5   1 -10   -0.12    0.35 
  -5   2 -10    0.21    0.85 
  -4   2 -10   11.62    1.63 
  -3   2 -10   15.25    1.22 
  -2   2 -10   -0.03    0.36 
  -1   2 -10   22.96    1.44 
   0   2 -10   15.88    1.19 
   1   2 -10    6.41    0.80 
   2   2 -10   10.73    0.82 
   3   2 -10    0.64    0.35 
   4   2 -10    2.80    0.53 
   5   2 -10    1.44    0.48 
  -4   3 -10    0.36    0.73 
  -3   3 -10    0.16    0.63 
  -2   3 -10    3.12    0.61 
  -1   3 -10    3.73    0.65 
   0   3 -10    1.98    0.52 
   1   3 -10    8.57    0.88 
   2   3 -10    0.48    0.34 
   3   3 -10    2.22    0.46 
   4   3 -10    0.18    0.35 
   5   3 -10    0.40    0.40 
  -4   4 -10    9.73    1.57 
  -3   4 -10    7.20    1.32 
  -2   4 -10   -0.16    0.37 
  -1   4 -10   15.44    1.19 
   0   4 -10    2.48    0.57 
   1   4 -10    0.29    0.39 
   2   4 -10   10.57    0.83 
   3   4 -10   -0.24    0.31 
   4   4 -10    1.52    0.47 
   5   4 -10    2.37    0.53 
  -4   5 -10    3.58    1.10 
  -3   5 -10    0.26    0.63 
  -2   5 -10    8.76    1.36 
  -1   5 -10    7.88    0.87 
   0   5 -10    0.20    0.40 
   1   5 -10    6.69    0.83 
   2   5 -10    0.63    0.35 
   3   5 -10    1.42    0.45 
   4   5 -10    0.15    0.35 
   5   5 -10   -0.06    0.45 
  -4   6 -10    1.97    0.64 
  -3   6 -10    7.90    1.43 
  -2   6 -10    0.13    0.66 
  -1   6 -10    4.80    1.06 
   0   6 -10   -0.02    0.37 
   1   6 -10    0.45    0.43 
   2   6 -10    0.98    0.48 
   3   6 -10    2.40    0.62 
   4   6 -10    4.36    0.75 
  -4   7 -10    1.24    0.62 
  -3   7 -10    6.24    0.99 
  -2   7 -10   17.92    2.00 
  -1   7 -10    1.87    0.83 
   0   7 -10    5.90    0.80 
   1   7 -10    3.05    0.64 
   2   7 -10    1.00    0.49 
   3   7 -10    2.55    0.63 
   4   7 -10    2.78    0.69 
  -3   8 -10    4.37    0.79 
  -2   8 -10    0.98    0.75 
  -1   8 -10    6.06    1.22 
   0   8 -10    5.83    1.18 
   1   8 -10    2.62    0.59 
   2   8 -10    2.46    0.62 
   3   8 -10    1.90    0.61 
   4   8 -10    0.55    0.52 
  -3   9 -10    1.47    0.59 
  -2   9 -10    4.13    0.74 
  -1   9 -10   -0.23    0.71 
   0   9 -10   18.59    2.05 
   1   9 -10    8.28    1.44 
   2   9 -10    0.59    0.47 
   3   9 -10    1.83    0.62 
  -3  10 -10   -0.29    0.52 
  -2  10 -10    0.27    0.51 
  -1  10 -10    4.04    0.79 
   0  10 -10    1.23    0.83 
   1  10 -10    1.12    0.74 
   2  10 -10    3.75    0.73 
   3  10 -10    0.03    0.47 
  -2  11 -10   10.05    1.10 
  -1  11 -10    1.27    0.60 
   0  11 -10   11.85    1.69 
   1  11 -10    6.48    1.33 
   2  11 -10    1.21    0.88 
  -1  12 -10    0.44    0.56 
   0  12 -10    0.10    0.52 
   1  12 -10   -0.19    0.73 
   2  12 -10    0.33    0.80 
  -1 -15  -9    0.15    0.46 
   0 -15  -9    3.37    0.72 
   1 -15  -9    1.85    0.58 
  -2 -14  -9    0.55    0.47 
  -1 -14  -9    5.58    0.82 
   0 -14  -9    2.07    0.60 
   1 -14  -9    6.01    0.83 
   2 -14  -9    4.19    0.60 
  -3 -13  -9    0.13    0.71 
  -2 -13  -9    3.60    0.70 
  -1 -13  -9    0.17    0.44 
   0 -13  -9    0.31    0.42 
   1 -13  -9    0.01    0.39 
   2 -13  -9    1.04    0.40 
   3 -13  -9   -0.13    0.31 
  -3 -12  -9   12.68    1.77 
  -2 -12  -9    1.26    0.53 
  -1 -12  -9   26.85    1.69 
   0 -12  -9    2.79    0.61 
   1 -12  -9    6.15    0.81 
   2 -12  -9    7.45    0.73 
   3 -12  -9    0.33    0.35 
   4 -12  -9    2.60    0.52 
  -4 -11  -9   -0.35    0.63 
  -3 -11  -9    0.70    0.71 
  -2 -11  -9   -0.08    0.52 
  -1 -11  -9    0.24    0.41 
   0 -11  -9    0.18    0.38 
   1 -11  -9    0.00    0.31 
   2 -11  -9    0.01    0.29 
   3 -11  -9   -0.40    0.30 
   4 -11  -9    0.22    0.35 
  -4 -10  -9    9.32    1.49 
  -3 -10  -9   10.41    1.52 
  -2 -10  -9    1.62    0.73 
  -1 -10  -9   33.75    1.85 
   0 -10  -9    6.04    0.76 
   1 -10  -9    9.97    0.80 
   2 -10  -9   15.14    1.00 
   3 -10  -9    0.35    0.33 
   4 -10  -9    4.05    0.62 
   5 -10  -9    0.85    0.43 
  -5  -9  -9    1.58    0.79 
  -4  -9  -9    0.00    0.43 
  -3  -9  -9    0.22    0.59 
  -2  -9  -9   11.38    1.50 
  -1  -9  -9    2.48    0.54 
   0  -9  -9    3.10    0.59 
   1  -9  -9    1.62    0.41 
   2  -9  -9    0.62    0.34 
   3  -9  -9    0.76    0.36 
   4  -9  -9    0.50    0.35 
   5  -9  -9   -0.03    0.36 
  -5  -8  -9    0.11    0.44 
  -4  -8  -9   18.19    1.34 
  -3  -8  -9    9.70    0.94 
  -2  -8  -9    5.07    0.72 
  -1  -8  -9   36.86    1.86 
   0  -8  -9    5.03    0.71 
   1  -8  -9    0.09    0.28 
   2  -8  -9   21.29    1.18 
   3  -8  -9    0.91    0.36 
   4  -8  -9   11.16    0.89 
   5  -8  -9    0.80    0.42 
  -5  -7  -9    2.47    0.65 
  -4  -7  -9    0.62    0.43 
  -3  -7  -9    2.64    0.57 
  -2  -7  -9    7.86    0.82 
  -1  -7  -9    0.15    0.26 
   0  -7  -9   15.02    1.12 
   1  -7  -9    0.46    0.37 
   2  -7  -9    0.26    0.31 
   3  -7  -9   14.46    1.00 
   4  -7  -9    0.08    0.32 
   5  -7  -9    0.54    0.37 
  -5  -6  -9   -0.07    0.41 
  -4  -6  -9    9.44    0.97 
  -3  -6  -9   10.24    0.95 
  -2  -6  -9    2.38    0.52 
  -1  -6  -9    1.94    0.38 
   0  -6  -9    6.25    0.58 
   1  -6  -9    3.13    0.58 
   2  -6  -9    6.92    0.82 
   3  -6  -9    0.61    0.44 
   4  -6  -9    3.58    0.65 
   5  -6  -9    3.12    0.68 
   6  -6  -9   -0.05    0.50 
  -5  -5  -9   11.09    1.08 
  -4  -5  -9    0.54    0.43 
  -3  -5  -9    6.46    0.80 
  -2  -5  -9    9.69    0.91 
  -1  -5  -9   11.52    0.80 
   0  -5  -9   18.01    0.97 
   1  -5  -9   18.54    0.97 
   2  -5  -9    2.81    0.57 
   3  -5  -9   12.90    1.12 
   4  -5  -9    4.73    0.74 
   5  -5  -9    4.43    0.76 
   6  -5  -9   -0.21    0.43 
  -5  -4  -9    0.84    0.48 
  -4  -4  -9    1.69    0.51 
  -3  -4  -9    3.58    0.62 
  -2  -4  -9    0.53    0.38 
  -1  -4  -9    0.90    0.40 
   0  -4  -9    0.31    0.26 
   1  -4  -9    9.27    0.69 
   2  -4  -9    3.24    0.45 
   3  -4  -9    0.79    0.45 
   4  -4  -9    0.30    0.41 
   5  -4  -9    0.52    0.46 
   6  -4  -9    0.11    0.45 
  -6  -3  -9    0.59    0.49 
  -5  -3  -9    7.97    0.90 
  -4  -3  -9    0.90    0.47 
  -3  -3  -9   14.52    1.14 
  -2  -3  -9   39.81    1.95 
  -1  -3  -9    0.29    0.35 
   0  -3  -9   33.38    1.33 
   1  -3  -9   27.52    1.23 
   2  -3  -9    0.58    0.29 
   3  -3  -9   13.70    0.88 
   4  -3  -9    1.80    0.57 
   5  -3  -9    0.73    0.52 
   6  -3  -9    2.01    0.64 
  -6  -2  -9    0.35    0.72 
  -5  -2  -9    0.32    0.44 
  -4  -2  -9    5.79    0.76 
  -3  -2  -9    0.70    0.40 
  -2  -2  -9    0.74    0.41 
  -1  -2  -9    5.74    0.71 
   0  -2  -9    3.54    0.46 
   1  -2  -9    0.05    0.24 
   2  -2  -9    0.20    0.26 
   3  -2  -9   -0.08    0.27 
   4  -2  -9    0.49    0.34 
   5  -2  -9    0.17    0.46 
   6  -2  -9    0.70    0.50 
  -6  -1  -9    0.93    0.75 
  -5  -1  -9   20.51    1.42 
  -4  -1  -9   20.33    1.37 
  -3  -1  -9    7.39    0.83 
  -2  -1  -9   19.68    1.28 
  -1  -1  -9    9.14    0.87 
   0  -1  -9    7.21    0.61 
   1  -1  -9   12.97    0.82 
   2  -1  -9    3.46    0.48 
   3  -1  -9    9.19    0.74 
   4  -1  -9    0.26    0.32 
   5  -1  -9    2.13    0.59 
   6  -1  -9    4.43    0.78 
  -6   0  -9    0.55    0.52 
  -5   0  -9    0.20    0.62 
  -4   0  -9   -0.19    0.36 
  -3   0  -9    0.03    0.34 
  -2   0  -9   -0.07    0.32 
  -1   0  -9   -0.17    0.28 
   0   0  -9   -0.33    0.22 
   1   0  -9    0.25    0.28 
   2   0  -9    0.29    0.27 
   3   0  -9    0.01    0.25 
   4   0  -9    0.01    0.29 
   5   0  -9   -0.01    0.32 
   6   0  -9    0.22    0.50 
  -6   1  -9    0.14    0.50 
  -5   1  -9   22.88    1.47 
  -4   1  -9   18.55    1.30 
  -3   1  -9    7.82    0.83 
  -2   1  -9   22.00    1.35 
  -1   1  -9    8.26    0.80 
   0   1  -9    6.77    0.73 
   1   1  -9   12.30    0.79 
   2   1  -9    3.77    0.50 
   3   1  -9   11.71    0.82 
   4   1  -9    0.23    0.31 
   5   1  -9    0.90    0.38 
   6   1  -9    4.16    0.65 
  -6   2  -9    0.23    0.48 
  -5   2  -9    0.91    0.49 
  -4   2  -9    5.04    0.71 
  -3   2  -9    0.44    0.41 
  -2   2  -9    1.32    0.44 
  -1   2  -9    5.04    0.65 
   0   2  -9    4.81    0.64 
   1   2  -9    0.08    0.26 
   2   2  -9    0.91    0.32 
   3   2  -9   -0.18    0.28 
   4   2  -9    0.09    0.29 
   5   2  -9    0.04    0.33 
   6   2  -9    0.62    0.43 
  -6   3  -9    0.82    0.58 
  -5   3  -9    9.01    0.95 
  -4   3  -9    0.40    0.43 
  -3   3  -9   18.85    1.00 
  -2   3  -9   44.03    2.00 
  -1   3  -9    0.33    0.34 
   0   3  -9   30.73    1.60 
   1   3  -9   26.34    1.22 
   2   3  -9    0.95    0.34 
   3   3  -9   13.77    0.92 
   4   3  -9    1.82    0.44 
   5   3  -9    1.28    0.44 
   6   3  -9    3.40    0.59 
  -5   4  -9    0.19    0.48 
  -4   4  -9    2.60    0.58 
  -3   4  -9    3.44    0.62 
  -2   4  -9    0.65    0.39 
  -1   4  -9    0.60    0.38 
   0   4  -9   -0.31    0.28 
   1   4  -9    7.90    0.67 
   2   4  -9    3.97    0.51 
   3   4  -9    0.53    0.34 
   4   4  -9   -0.19    0.31 
   5   4  -9    0.62    0.39 
   6   4  -9    0.62    0.50 
  -5   5  -9   12.58    1.15 
  -4   5  -9    0.23    0.42 
  -3   5  -9    9.30    0.91 
  -2   5  -9   12.33    1.01 
  -1   5  -9   11.04    0.95 
   0   5  -9   17.09    1.20 
   1   5  -9   17.29    0.99 
   2   5  -9    2.28    0.45 
   3   5  -9   12.59    0.91 
   4   5  -9    3.41    0.54 
   5   5  -9    5.69    0.84 
   6   5  -9    0.40    0.51 
  -5   6  -9   -0.15    0.45 
  -4   6  -9    9.81    1.00 
  -3   6  -9   12.54    1.07 
  -2   6  -9    2.81    0.54 
  -1   6  -9    3.04    0.45 
   0   6  -9    6.77    0.75 
   1   6  -9    3.07    0.57 
   2   6  -9    8.22    0.89 
   3   6  -9    0.00    0.37 
   4   6  -9    5.55    0.80 
   5   6  -9    3.29    0.71 
   6   6  -9   -0.54    0.45 
  -5   7  -9    4.52    0.77 
  -4   7  -9    0.82    0.52 
  -3   7  -9    5.23    0.74 
  -2   7  -9    7.65    0.85 
  -1   7  -9    0.10    0.37 
   0   7  -9   15.63    1.00 
   1   7  -9   -0.15    0.32 
   2   7  -9    0.55    0.41 
   3   7  -9   11.55    1.07 
   4   7  -9   -0.42    0.37 
   5   7  -9   -0.01    0.45 
  -5   8  -9    0.31    0.53 
  -4   8  -9   19.78    1.43 
  -3   8  -9    8.70    0.94 
  -2   8  -9    4.64    0.68 
  -1   8  -9   36.30    1.81 
   0   8  -9    6.19    0.60 
   1   8  -9   -0.41    0.33 
   2   8  -9   22.90    1.47 
   3   8  -9    1.08    0.50 
   4   8  -9   11.84    1.13 
   5   8  -9    0.51    0.52 
  -5   9  -9    2.38    0.95 
  -4   9  -9    0.26    0.50 
  -3   9  -9    0.72    0.49 
  -2   9  -9   13.85    1.17 
  -1   9  -9    5.15    0.72 
   0   9  -9    3.97    0.63 
   1   9  -9    1.52    0.38 
   2   9  -9    0.66    0.44 
   3   9  -9    0.25    0.41 
   4   9  -9   -0.28    0.41 
   5   9  -9   -0.43    0.45 
  -4  10  -9   10.16    1.07 
  -3  10  -9   11.60    1.08 
  -2  10  -9    1.55    0.54 
  -1  10  -9   45.05    2.11 
   0  10  -9    7.98    0.87 
   1  10  -9   10.65    1.00 
   2  10  -9   15.49    1.22 
   3  10  -9    0.41    0.44 
   4  10  -9    3.06    0.70 
   5  10  -9    0.40    0.56 
  -4  11  -9    0.12    0.53 
  -3  11  -9    0.33    0.49 
  -2  11  -9    0.50    0.50 
  -1  11  -9    0.06    0.45 
   0  11  -9   -0.17    0.38 
   1  11  -9   -0.12    0.39 
   2  11  -9    0.26    0.34 
   3  11  -9    0.02    0.42 
   4  11  -9   -0.66    0.43 
  -3  12  -9   11.85    1.17 
  -2  12  -9    1.15    0.58 
  -1  12  -9   28.72    1.72 
   0  12  -9    3.90    0.73 
   1  12  -9    6.11    0.82 
   2  12  -9    7.34    0.90 
   3  12  -9   -0.40    0.45 
   4  12  -9    2.57    0.70 
  -3  13  -9    0.34    0.55 
  -2  13  -9    5.21    0.83 
  -1  13  -9    0.22    0.48 
   0  13  -9    1.61    0.58 
   1  13  -9    1.10    0.52 
   2  13  -9    0.66    0.51 
   3  13  -9    0.07    0.48 
  -2  14  -9    0.39    0.57 
  -1  14  -9    5.28    0.87 
   0  14  -9    1.58    0.59 
   1  14  -9    9.20    1.00 
   2  14  -9    5.39    0.85 
  -1  15  -9    0.92    0.58 
   0  15  -9    3.54    0.78 
   1  15  -9    3.61    0.80 
  -1 -17  -8    0.78    0.50 
   0 -17  -8    4.68    0.79 
   1 -17  -8    3.16    1.03 
   2 -17  -8    0.49    0.51 
  -2 -16  -8    1.18    0.56 
  -1 -16  -8    8.90    0.97 
   0 -16  -8    2.07    0.59 
   1 -16  -8    3.05    0.65 
   2 -16  -8   -0.10    0.43 
   3 -16  -8   -0.04    0.39 
  -3 -15  -8    5.07    0.78 
  -2 -15  -8    4.99    0.79 
  -1 -15  -8    0.04    0.41 
   0 -15  -8   15.29    1.23 
   1 -15  -8    1.08    0.40 
   2 -15  -8    3.02    0.52 
   3 -15  -8    2.95    0.66 
  -4 -14  -8    0.48    0.72 
  -3 -14  -8    0.98    0.49 
  -2 -14  -8    1.23    0.51 
  -1 -14  -8    0.36    0.42 
   0 -14  -8    0.05    0.36 
   1 -14  -8    0.63    0.35 
   2 -14  -8    1.27    0.39 
   3 -14  -8    0.38    0.40 
   4 -14  -8    0.55    0.46 
  -4 -13  -8    0.77    0.78 
  -3 -13  -8   14.87    1.82 
  -2 -13  -8   16.23    1.25 
  -1 -13  -8   -0.14    0.36 
   0 -13  -8   23.22    1.48 
   1 -13  -8    7.17    0.68 
   2 -13  -8    2.08    0.44 
   3 -13  -8    6.47    0.68 
   4 -13  -8    0.13    0.43 
  -5 -12  -8    0.64    0.78 
  -4 -12  -8    0.74    0.69 
  -3 -12  -8    0.73    0.71 
  -2 -12  -8    0.42    0.43 
  -1 -12  -8   -0.01    0.34 
   0 -12  -8    2.47    0.53 
   1 -12  -8    0.02    0.27 
   2 -12  -8    0.11    0.29 
   3 -12  -8   -0.14    0.29 
   4 -12  -8    0.11    0.34 
   5 -12  -8    0.11    0.45 
  -5 -11  -8    6.19    0.85 
  -4 -11  -8    4.69    1.07 
  -3 -11  -8   16.69    1.87 
  -2 -11  -8   18.53    1.30 
  -1 -11  -8    0.09    0.34 
   0 -11  -8   35.30    1.83 
   1 -11  -8    7.89    0.70 
   2 -11  -8    4.79    0.57 
   3 -11  -8    7.85    0.73 
   4 -11  -8    0.40    0.33 
   5 -11  -8    1.88    0.61 
  -5 -10  -8    0.29    0.44 
  -4 -10  -8   -0.01    0.36 
  -3 -10  -8    0.40    0.62 
  -2 -10  -8    0.11    0.34 
  -1 -10  -8    0.52    0.38 
   0 -10  -8    0.34    0.36 
   1 -10  -8    7.78    0.68 
   2 -10  -8    0.93    0.33 
   3 -10  -8   -0.26    0.26 
   4 -10  -8    0.50    0.33 
   5 -10  -8    0.04    0.33 
   6 -10  -8    0.18    0.50 
  -6  -9  -8    0.46    0.48 
  -5  -9  -8   13.63    1.17 
  -4  -9  -8    0.91    0.44 
  -3  -9  -8   14.03    1.11 
  -2  -9  -8   32.16    1.45 
  -1  -9  -8    0.03    0.33 
   0  -9  -8   12.58    0.82 
   1  -9  -8   24.44    1.16 
   2  -9  -8    7.13    0.64 
   3  -9  -8    9.46    0.76 
   4  -9  -8    0.10    0.31 
   5  -9  -8    1.76    0.46 
   6  -9  -8    1.21    0.61 
  -6  -8  -8    0.52    0.49 
  -5  -8  -8    0.23    0.40 
  -4  -8  -8    4.37    0.67 
  -3  -8  -8    0.67    0.39 
  -2  -8  -8    2.41    0.38 
  -1  -8  -8   18.25    0.96 
   0  -8  -8    1.00    0.33 
   1  -8  -8    7.96    0.67 
   2  -8  -8    6.75    0.64 
   3  -8  -8    1.66    0.38 
   4  -8  -8    0.11    0.29 
   5  -8  -8    4.28    0.59 
   6  -8  -8    1.04    0.44 
  -6  -7  -8    5.55    0.82 
  -5  -7  -8   12.98    1.13 
  -4  -7  -8    0.88    0.44 
  -3  -7  -8   35.28    1.77 
  -2  -7  -8   19.84    1.01 
  -1  -7  -8    0.09    0.25 
   0  -7  -8   18.15    0.82 
   1  -7  -8   21.37    1.08 
   2  -7  -8    0.64    0.30 
   3  -7  -8   20.91    1.12 
   4  -7  -8   -0.36    0.25 
   5  -7  -8    2.63    0.49 
   6  -7  -8   -0.01    0.35 
  -6  -6  -8    3.45    0.70 
  -5  -6  -8    0.06    0.38 
  -4  -6  -8   18.26    1.29 
  -3  -6  -8    8.17    0.83 
  -2  -6  -8    4.53    0.64 
  -1  -6  -8    6.32    0.54 
   0  -6  -8    9.16    0.64 
   1  -6  -8    4.41    0.42 
   2  -6  -8   35.61    1.44 
   3  -6  -8    0.88    0.34 
   4  -6  -8    5.09    0.60 
   5  -6  -8    0.00    0.30 
   6  -6  -8    1.97    0.50 
  -6  -5  -8    5.16    0.79 
  -5  -5  -8    4.51    0.71 
  -4  -5  -8    2.55    0.55 
  -3  -5  -8    4.21    0.63 
  -2  -5  -8    3.32    0.54 
  -1  -5  -8    1.59    0.33 
   0  -5  -8   35.80    1.34 
   1  -5  -8    0.21    0.24 
   2  -5  -8    3.68    0.40 
   3  -5  -8   13.11    0.89 
   4  -5  -8    1.41    0.38 
   5  -5  -8    2.14    0.56 
   6  -5  -8    0.47    0.45 
   7  -5  -8    0.78    0.53 
  -6  -4  -8    5.04    0.63 
  -5  -4  -8    0.88    0.45 
  -4  -4  -8   37.55    1.84 
  -3  -4  -8   18.41    1.22 
  -2  -4  -8    9.06    0.82 
  -1  -4  -8   57.69    1.59 
   0  -4  -8   45.41    1.38 
   1  -4  -8    5.18    0.51 
   2  -4  -8   12.35    0.75 
   3  -4  -8    0.96    0.31 
   4  -4  -8    7.15    0.82 
   5  -4  -8    0.34    0.40 
   6  -4  -8    0.54    0.48 
   7  -4  -8    2.46    0.69 
  -6  -3  -8    0.52    0.38 
  -5  -3  -8    1.89    0.42 
  -4  -3  -8    0.01    0.33 
  -3  -3  -8    0.08    0.31 
  -2  -3  -8   17.18    1.13 
  -1  -3  -8    3.56    0.43 
   0  -3  -8    3.45    0.42 
   1  -3  -8   -0.27    0.21 
   2  -3  -8    0.78    0.29 
   3  -3  -8    3.48    0.45 
   4  -3  -8    0.95    0.36 
   5  -3  -8    3.47    0.64 
   6  -3  -8    1.09    0.54 
   7  -3  -8    0.08    0.48 
  -6  -2  -8    7.13    0.70 
  -5  -2  -8    0.42    0.32 
  -4  -2  -8   19.68    1.01 
  -3  -2  -8   15.62    1.13 
  -2  -2  -8   15.91    1.09 
  -1  -2  -8   82.81    2.06 
   0  -2  -8   -0.27    0.20 
   1  -2  -8   18.14    0.92 
   2  -2  -8   22.01    1.05 
   3  -2  -8    0.46    0.28 
   4  -2  -8   11.82    0.80 
   5  -2  -8    4.08    0.72 
   6  -2  -8    0.00    0.40 
   7  -2  -8    0.39    0.51 
  -7  -1  -8   -0.85    0.45 
  -6  -1  -8    1.03    0.50 
  -5  -1  -8    0.73    0.34 
  -4  -1  -8    0.09    0.27 
  -3  -1  -8    3.15    0.46 
  -2  -1  -8    3.19    0.54 
  -1  -1  -8    0.87    0.30 
   0  -1  -8    1.32    0.32 
   1  -1  -8    0.52    0.26 
   2  -1  -8    1.15    0.31 
   3  -1  -8   -0.22    0.24 
   4  -1  -8    0.54    0.31 
   5  -1  -8    2.02    0.43 
   6  -1  -8   -0.11    0.40 
   7  -1  -8    0.57    0.49 
  -7   0  -8    3.40    0.79 
  -6   0  -8   16.68    1.27 
  -5   0  -8    0.08    0.30 
  -4   0  -8   16.73    0.93 
  -3   0  -8    8.77    0.63 
  -2   0  -8   10.11    0.84 
  -1   0  -8   13.71    0.98 
   0   0  -8   27.50    1.13 
   1   0  -8   98.23    2.39 
   2   0  -8   17.53    0.95 
   3   0  -8   -0.01    0.26 
   4   0  -8   39.68    1.58 
   5   0  -8    3.03    0.47 
   6   0  -8    2.98    0.52 
   7   0  -8   -0.16    0.46 
  -7   1  -8    0.21    0.48 
  -6   1  -8    0.48    0.48 
  -5   1  -8    0.52    0.42 
  -4   1  -8    0.36    0.30 
  -3   1  -8    3.57    0.42 
  -2   1  -8    3.10    0.39 
  -1   1  -8    0.50    0.31 
   0   1  -8    1.37    0.32 
   1   1  -8    0.86    0.29 
   2   1  -8    1.04    0.32 
   3   1  -8    0.08    0.26 
   4   1  -8    0.47    0.31 
   5   1  -8    2.08    0.44 
   6   1  -8    0.05    0.34 
   7   1  -8    0.28    0.41 
  -6   2  -8   10.80    1.05 
  -5   2  -8    0.38    0.41 
  -4   2  -8   19.30    1.00 
  -3   2  -8   18.58    0.94 
  -2   2  -8   15.67    0.82 
  -1   2  -8   81.61    2.03 
   0   2  -8    0.25    0.25 
   1   2  -8   15.77    0.87 
   2   2  -8   22.76    1.08 
   3   2  -8    1.03    0.34 
   4   2  -8   11.60    0.82 
   5   2  -8    3.79    0.54 
   6   2  -8    0.43    0.37 
   7   2  -8    0.38    0.39 
  -6   3  -8    0.28    0.47 
  -5   3  -8    0.82    0.43 
  -4   3  -8    0.38    0.36 
  -3   3  -8    0.38    0.27 
  -2   3  -8   21.77    0.97 
  -1   3  -8    3.00    0.38 
   0   3  -8    3.43    0.42 
   1   3  -8    0.43    0.25 
   2   3  -8    0.73    0.29 
   3   3  -8    3.75    0.49 
   4   3  -8    1.85    0.42 
   5   3  -8    2.51    0.48 
   6   3  -8    0.70    0.37 
   7   3  -8    0.22    0.48 
  -6   4  -8    5.57    0.80 
  -5   4  -8    0.18    0.41 
  -4   4  -8   35.71    1.79 
  -3   4  -8   17.54    0.96 
  -2   4  -8    9.89    0.68 
  -1   4  -8   56.51    1.56 
   0   4  -8   40.24    1.10 
   1   4  -8    5.56    0.53 
   2   4  -8   12.95    0.81 
   3   4  -8    1.07    0.35 
   4   4  -8    9.87    0.78 
   5   4  -8    0.79    0.37 
   6   4  -8    0.50    0.46 
   7   4  -8    2.03    0.61 
  -6   5  -8    4.14    0.75 
  -5   5  -8    4.40    0.71 
  -4   5  -8    3.64    0.63 
  -3   5  -8    4.08    0.61 
  -2   5  -8    4.57    0.46 
  -1   5  -8    1.27    0.32 
   0   5  -8   34.55    1.24 
   1   5  -8   -0.04    0.19 
   2   5  -8    3.49    0.47 
   3   5  -8   17.67    1.01 
   4   5  -8    1.65    0.39 
   5   5  -8    2.92    0.61 
   6   5  -8    0.76    0.48 
   7   5  -8   -0.25    0.44 
  -6   6  -8    5.18    0.63 
  -5   6  -8   -0.49    0.28 
  -4   6  -8   20.53    1.35 
  -3   6  -8    9.14    0.88 
  -2   6  -8    4.22    0.60 
  -1   6  -8    6.80    0.55 
   0   6  -8    8.64    0.62 
   1   6  -8    4.82    0.48 
   2   6  -8   29.81    1.59 
   3   6  -8    0.33    0.36 
   4   6  -8    4.77    0.72 
   5   6  -8    0.07    0.37 
   6   6  -8    1.56    0.56 
  -6   7  -8    4.75    0.63 
  -5   7  -8   13.20    0.92 
  -4   7  -8   -0.38    0.38 
  -3   7  -8   35.07    1.79 
  -2   7  -8   21.54    1.31 
  -1   7  -8    0.37    0.27 
   0   7  -8   20.26    0.96 
   1   7  -8   24.48    1.12 
   2   7  -8    0.19    0.25 
   3   7  -8   20.70    1.36 
   4   7  -8    0.08    0.39 
   5   7  -8    2.05    0.60 
   6   7  -8    0.30    0.46 
  -6   8  -8    0.61    0.42 
  -5   8  -8    0.28    0.38 
  -4   8  -8    5.28    0.75 
  -3   8  -8    0.83    0.45 
  -2   8  -8    2.20    0.51 
  -1   8  -8   14.86    1.07 
   0   8  -8    1.03    0.32 
   1   8  -8    8.15    0.64 
   2   8  -8    5.90    0.56 
   3   8  -8    2.79    0.45 
   4   8  -8    0.37    0.40 
   5   8  -8    2.77    0.65 
   6   8  -8    0.46    0.50 
  -6   9  -8   -0.05    0.37 
  -5   9  -8   14.37    1.23 
  -4   9  -8    0.42    0.44 
  -3   9  -8   17.63    1.25 
  -2   9  -8   38.54    1.84 
  -1   9  -8   -0.21    0.34 
   0   9  -8   11.37    0.95 
   1   9  -8   25.72    1.17 
   2   9  -8    8.44    0.69 
   3   9  -8    9.59    0.74 
   4   9  -8    0.69    0.44 
   5   9  -8    2.83    0.67 
   6   9  -8    3.98    0.77 
  -5  10  -8    0.44    0.51 
  -4  10  -8   -0.14    0.42 
  -3  10  -8    0.45    0.45 
  -2  10  -8    1.32    0.50 
  -1  10  -8    1.02    0.45 
   0  10  -8    0.74    0.40 
   1  10  -8    7.71    0.65 
   2  10  -8    1.73    0.41 
   3  10  -8    0.31    0.33 
   4  10  -8    0.42    0.36 
   5  10  -8   -0.16    0.40 
   6  10  -8    0.21    0.53 
  -5  11  -8    7.28    0.94 
  -4  11  -8    2.19    0.62 
  -3  11  -8   16.32    1.25 
  -2  11  -8   21.92    1.41 
  -1  11  -8    0.14    0.41 
   0  11  -8   35.77    1.81 
   1  11  -8    8.00    0.87 
   2  11  -8    5.46    0.60 
   3  11  -8    9.14    0.74 
   4  11  -8   -0.16    0.33 
   5  11  -8    2.50    0.68 
  -5  12  -8   -0.64    0.47 
  -4  12  -8   -0.28    0.44 
  -3  12  -8    1.44    0.53 
  -2  12  -8   -0.09    0.41 
  -1  12  -8    1.09    0.53 
   0  12  -8    2.02    0.57 
   1  12  -8   -0.03    0.38 
   2  12  -8    0.21    0.43 
   3  12  -8   -0.25    0.30 
   4  12  -8    0.08    0.34 
   5  12  -8    0.12    0.39 
  -4  13  -8   -0.14    0.46 
  -3  13  -8   20.27    1.44 
  -2  13  -8   18.28    1.36 
  -1  13  -8   -0.32    0.42 
   0  13  -8   25.46    1.53 
   1  13  -8    8.82    0.89 
   2  13  -8    3.42    0.67 
   3  13  -8    8.68    0.76 
   4  13  -8    0.06    0.37 
  -4  14  -8    1.04    0.56 
  -3  14  -8    1.04    0.56 
  -2  14  -8    1.20    0.55 
  -1  14  -8    0.89    0.51 
   0  14  -8    0.95    0.48 
   1  14  -8    0.00    0.41 
   2  14  -8    1.42    0.55 
   3  14  -8    0.41    0.51 
   4  14  -8    0.58    0.43 
  -3  15  -8    5.86    0.87 
  -2  15  -8    7.24    0.92 
  -1  15  -8    0.45    0.50 
   0  15  -8   19.02    1.39 
   1  15  -8    0.51    0.53 
   2  15  -8    4.30    0.78 
   3  15  -8    4.17    0.75 
  -2  16  -8    1.06    0.60 
  -1  16  -8    9.09    0.97 
   0  16  -8    2.62    0.69 
   1  16  -8    3.26    0.71 
   2  16  -8    0.18    0.50 
   3  16  -8   -0.61    0.50 
  -1  17  -8    1.02    0.58 
   0  17  -8    6.46    0.92 
   1  17  -8    1.29    0.60 
   2  17  -8    1.69    0.92 
  -1 -19  -7    1.90    0.60 
   0 -19  -7    8.12    1.39 
   1 -19  -7    2.79    0.99 
  -2 -18  -7    4.80    0.79 
  -1 -18  -7    4.57    0.74 
   0 -18  -7    1.62    0.55 
   1 -18  -7    5.20    0.80 
   2 -18  -7    3.04    0.65 
  -3 -17  -7    5.02    0.82 
  -2 -17  -7    5.75    0.82 
  -1 -17  -7    1.45    0.56 
   0 -17  -7    9.34    0.95 
   1 -17  -7    2.54    0.55 
   2 -17  -7   -0.26    0.35 
   3 -17  -7    3.35    0.70 
  -4 -16  -7    4.63    0.75 
  -3 -16  -7    3.71    0.69 
  -2 -16  -7    6.14    0.83 
  -1 -16  -7    7.42    0.87 
   0 -16  -7    1.04    0.46 
   1 -16  -7    8.63    0.74 
   2 -16  -7    4.39    0.72 
   3 -16  -7    4.03    0.73 
   4 -16  -7    4.97    0.78 
  -4 -15  -7    1.22    0.84 
  -3 -15  -7    2.27    0.61 
  -2 -15  -7    3.44    0.65 
  -1 -15  -7    0.08    0.37 
   0 -15  -7    0.99    0.44 
   1 -15  -7    0.80    0.33 
   2 -15  -7    0.04    0.29 
   3 -15  -7    0.40    0.39 
   4 -15  -7    0.25    0.40 
   5 -15  -7    1.42    0.59 
  -5 -14  -7   -0.09    0.67 
  -4 -14  -7   20.67    2.11 
  -3 -14  -7    4.29    0.69 
  -2 -14  -7   11.34    1.05 
  -1 -14  -7   20.34    1.34 
   0 -14  -7    1.52    0.48 
   1 -14  -7   18.26    1.03 
   2 -14  -7   11.74    0.83 
   3 -14  -7    2.23    0.57 
   4 -14  -7   14.52    1.27 
   5 -14  -7   -0.02    0.42 
  -5 -13  -7    0.53    0.74 
  -4 -13  -7    0.38    0.68 
  -3 -13  -7    4.08    0.68 
  -2 -13  -7    1.27    0.48 
  -1 -13  -7    0.63    0.38 
   0 -13  -7    0.13    0.27 
   1 -13  -7    0.49    0.29 
   2 -13  -7   -0.07    0.28 
   3 -13  -7    0.09    0.29 
   4 -13  -7    0.14    0.40 
   5 -13  -7    0.81    0.49 
  -6 -12  -7    2.83    1.21 
  -5 -12  -7   -0.40    0.37 
  -4 -12  -7   29.99    2.46 
  -3 -12  -7    5.72    0.74 
  -2 -12  -7   30.04    1.65 
  -1 -12  -7   35.28    1.80 
   0 -12  -7    0.03    0.24 
   1 -12  -7   15.56    0.92 
   2 -12  -7   22.50    1.13 
   3 -12  -7    2.40    0.43 
   4 -12  -7    5.07    0.74 
   5 -12  -7    1.59    0.57 
   6 -12  -7    1.68    0.65 
  -6 -11  -7    1.14    0.51 
  -5 -11  -7    0.35    0.42 
  -4 -11  -7    0.05    0.35 
  -3 -11  -7    0.07    0.35 
  -2 -11  -7    0.82    0.37 
  -1 -11  -7    0.81    0.39 
   0 -11  -7    3.49    0.44 
   1 -11  -7    0.01    0.25 
   2 -11  -7    0.35    0.29 
   3 -11  -7    2.86    0.45 
   4 -11  -7    0.83    0.35 
   5 -11  -7    0.42    0.46 
   6 -11  -7    0.28    0.48 
  -6 -10  -7    0.50    0.48 
  -5 -10  -7    1.42    0.50 
  -4 -10  -7   23.44    1.42 
  -3 -10  -7    6.48    0.58 
  -2 -10  -7    7.69    0.77 
  -1 -10  -7   34.93    1.70 
   0 -10  -7    0.64    0.27 
   1 -10  -7   24.78    1.14 
   2 -10  -7    2.13    0.38 
   3 -10  -7    1.06    0.33 
   4 -10  -7   11.04    0.82 
   5 -10  -7    1.62    0.43 
   6 -10  -7    1.47    0.60 
  -6  -9  -7   -0.18    0.39 
  -5  -9  -7    1.59    0.51 
  -4  -9  -7   -0.31    0.30 
  -3  -9  -7   15.86    0.88 
  -2  -9  -7   14.59    0.82 
  -1  -9  -7    0.52    0.34 
   0  -9  -7   12.87    0.77 
   1  -9  -7    2.27    0.38 
   2  -9  -7    1.68    0.34 
   3  -9  -7    0.19    0.25 
   4  -9  -7   -0.12    0.28 
   5  -9  -7    0.24    0.32 
   6  -9  -7    0.23    0.43 
   7  -9  -7    0.84    0.57 
  -7  -8  -7    0.88    0.84 
  -6  -8  -7    3.36    0.60 
  -5  -8  -7    7.94    0.89 
  -4  -8  -7   18.83    1.25 
  -3  -8  -7    4.57    0.62 
  -2  -8  -7   21.56    1.00 
  -1  -8  -7   25.30    1.07 
   0  -8  -7   26.68    1.14 
   1  -8  -7   21.21    1.02 
   2  -8  -7    9.69    0.70 
   3  -8  -7    2.31    0.39 
   4  -8  -7    9.88    0.75 
   5  -8  -7    0.48    0.34 
   6  -8  -7    1.66    0.43 
   7  -8  -7    2.24    0.67 
  -7  -7  -7    0.18    0.39 
  -6  -7  -7    4.57    0.57 
  -5  -7  -7    7.28    0.67 
  -4  -7  -7    0.35    0.34 
  -3  -7  -7   22.60    1.30 
  -2  -7  -7    2.60    0.36 
  -1  -7  -7    3.45    0.40 
   0  -7  -7   13.83    0.64 
   1  -7  -7   17.17    0.89 
   2  -7  -7   13.53    0.83 
   3  -7  -7    2.65    0.42 
   4  -7  -7    0.24    0.27 
   5  -7  -7    1.59    0.40 
   6  -7  -7    0.61    0.35 
   7  -7  -7   -0.04    0.46 
  -7  -6  -7   12.00    0.95 
  -6  -6  -7    7.71    0.72 
  -5  -6  -7    0.88    0.34 
  -4  -6  -7   23.83    1.40 
  -3  -6  -7    0.38    0.33 
  -2  -6  -7    3.20    0.40 
  -1  -6  -7   74.50    1.86 
   0  -6  -7    0.08    0.20 
   1  -6  -7   24.88    0.91 
   2  -6  -7   28.34    1.21 
   3  -6  -7    0.92    0.31 
   4  -6  -7    6.25    0.61 
   5  -6  -7    1.64    0.40 
   6  -6  -7    5.76    0.66 
   7  -6  -7    0.38    0.38 
  -7  -5  -7    2.05    0.50 
  -6  -5  -7    0.87    0.40 
  -5  -5  -7   17.59    0.98 
  -4  -5  -7    0.17    0.25 
  -3  -5  -7   13.95    1.00 
  -2  -5  -7    3.98    0.43 
  -1  -5  -7    0.20    0.23 
   0  -5  -7   17.62    0.73 
   1  -5  -7    0.49    0.21 
   2  -5  -7   35.29    1.09 
   3  -5  -7   22.83    1.12 
   4  -5  -7    3.95    0.50 
   5  -5  -7    6.97    0.68 
   6  -5  -7    1.76    0.44 
   7  -5  -7   -0.01    0.44 
  -7  -4  -7    4.07    0.60 
  -6  -4  -7    4.28    0.56 
  -5  -4  -7    1.90    0.38 
  -4  -4  -7    3.03    0.41 
  -3  -4  -7   11.96    0.71 
  -2  -4  -7   11.88    0.69 
  -1  -4  -7   16.92    0.82 
   0  -4  -7   19.94    0.89 
   1  -4  -7   45.76    1.30 
   2  -4  -7    4.51    0.40 
   3  -4  -7    0.11    0.20 
   4  -4  -7    7.04    0.62 
   5  -4  -7    2.82    0.48 
   6  -4  -7    0.69    0.47 
   7  -4  -7    0.62    0.48 
  -7  -3  -7    1.53    0.45 
  -6  -3  -7    5.98    0.65 
  -5  -3  -7   19.38    1.03 
  -4  -3  -7    0.21    0.25 
  -3  -3  -7   27.76    1.11 
  -2  -3  -7   66.12    1.49 
  -1  -3  -7    7.81    0.55 
   0  -3  -7   58.95    1.54 
   1  -3  -7   11.98    0.68 
   2  -3  -7   15.84    0.81 
   3  -3  -7    8.74    0.63 
   4  -3  -7    0.02    0.23 
   5  -3  -7   10.47    0.97 
   6  -3  -7    4.66    0.72 
   7  -3  -7    0.37    0.48 
  -7  -2  -7    1.45    0.56 
  -6  -2  -7    3.07    0.49 
  -5  -2  -7    1.96    0.39 
  -4  -2  -7    4.44    0.47 
  -3  -2  -7    1.03    0.29 
  -2  -2  -7   13.66    0.72 
  -1  -2  -7   13.70    0.72 
   0  -2  -7    0.27    0.21 
   1  -2  -7    1.13    0.28 
   2  -2  -7    0.15    0.23 
   3  -2  -7    0.27    0.24 
   4  -2  -7    4.10    0.49 
   5  -2  -7   -0.23    0.25 
   6  -2  -7    0.07    0.39 
   7  -2  -7    0.22    0.44 
  -7  -1  -7    4.37    0.74 
  -6  -1  -7   13.17    0.88 
  -5  -1  -7   23.75    1.13 
  -4  -1  -7    0.08    0.25 
  -3  -1  -7   56.60    1.51 
  -2  -1  -7   50.41    1.37 
  -1  -1  -7   24.02    0.78 
   0  -1  -7  151.54    3.27 
   1  -1  -7   18.70    0.88 
   2  -1  -7   11.41    0.70 
   3  -1  -7   60.26    1.67 
   4  -1  -7    5.28    0.54 
   5  -1  -7   11.89    0.83 
   6  -1  -7    2.58    0.48 
   7  -1  -7    0.73    0.54 
  -7   0  -7   -0.22    0.43 
  -6   0  -7    0.28    0.41 
  -5   0  -7   -0.02    0.26 
  -4   0  -7    0.00    0.24 
  -3   0  -7    0.00    0.23 
  -2   0  -7   -0.33    0.20 
  -1   0  -7    0.00    0.18 
   0   0  -7   -0.07    0.20 
   1   0  -7    0.02    0.20 
   2   0  -7    0.06    0.23 
   3   0  -7   -0.17    0.22 
   4   0  -7   -0.37    0.23 
   5   0  -7    0.28    0.28 
   6   0  -7    0.23    0.31 
   7   0  -7    0.33    0.36 
  -7   1  -7    5.95    0.83 
  -6   1  -7   13.70    1.13 
  -5   1  -7   24.11    1.13 
  -4   1  -7   -0.05    0.25 
  -3   1  -7   53.14    1.49 
  -2   1  -7   48.98    1.37 
  -1   1  -7   24.05    0.83 
   0   1  -7  152.02    2.79 
   1   1  -7   18.02    0.87 
   2   1  -7   10.46    0.68 
   3   1  -7   62.42    1.71 
   4   1  -7    4.86    0.53 
   5   1  -7   11.80    0.84 
   6   1  -7    2.94    0.50 
   7   1  -7    1.94    0.48 
  -7   2  -7    0.63    0.53 
  -6   2  -7    2.43    0.57 
  -5   2  -7    1.77    0.49 
  -4   2  -7    3.40    0.43 
  -3   2  -7    1.06    0.29 
  -2   2  -7   12.78    0.72 
  -1   2  -7   15.12    0.63 
   0   2  -7    0.10    0.17 
   1   2  -7    1.50    0.24 
   2   2  -7    0.06    0.24 
   3   2  -7    1.03    0.33 
   4   2  -7    3.93    0.50 
   5   2  -7    0.14    0.27 
   6   2  -7   -0.12    0.30 
   7   2  -7    0.76    0.39 
  -7   3  -7    0.44    0.52 
  -6   3  -7    6.42    0.76 
  -5   3  -7   22.86    1.40 
  -4   3  -7    0.03    0.24 
  -3   3  -7   31.63    1.19 
  -2   3  -7   64.97    1.69 
  -1   3  -7    6.94    0.52 
   0   3  -7   58.89    1.32 
   1   3  -7   11.94    0.58 
   2   3  -7   16.95    0.72 
   3   3  -7    8.37    0.66 
   4   3  -7   -0.01    0.26 
   5   3  -7   11.09    0.83 
   6   3  -7    5.03    0.62 
   7   3  -7   -0.27    0.39 
  -7   4  -7    2.67    0.67 
  -6   4  -7    3.70    0.65 
  -5   4  -7    1.02    0.46 
  -4   4  -7    2.30    0.52 
  -3   4  -7   10.16    0.65 
  -2   4  -7   11.15    0.67 
  -1   4  -7   17.73    0.84 
   0   4  -7   18.80    0.73 
   1   4  -7   42.32    1.10 
   2   4  -7    5.37    0.40 
   3   4  -7    0.09    0.25 
   4   4  -7    9.51    0.74 
   5   4  -7    3.47    0.50 
   6   4  -7    0.26    0.41 
   7   4  -7    0.96    0.48 
  -7   5  -7    1.55    0.62 
  -6   5  -7    0.72    0.48 
  -5   5  -7   19.86    1.32 
  -4   5  -7    0.02    0.33 
  -3   5  -7   15.65    0.82 
  -2   5  -7    3.61    0.38 
  -1   5  -7    0.36    0.24 
   0   5  -7   15.58    0.68 
   1   5  -7    1.15    0.26 
   2   5  -7   37.28    1.12 
   3   5  -7   21.77    0.88 
   4   5  -7    4.06    0.53 
   5   5  -7    6.87    0.84 
   6   5  -7    1.54    0.53 
   7   5  -7    0.08    0.43 
  -7   6  -7   10.01    0.86 
  -6   6  -7    8.21    0.75 
  -5   6  -7    1.60    0.37 
  -4   6  -7   22.67    1.08 
  -3   6  -7   -0.10    0.22 
  -2   6  -7    2.86    0.38 
  -1   6  -7   73.30    1.85 
   0   6  -7    0.51    0.26 
   1   6  -7   27.89    1.08 
   2   6  -7   31.26    1.20 
   3   6  -7    1.13    0.30 
   4   6  -7    6.75    0.59 
   5   6  -7    2.32    0.56 
   6   6  -7    4.55    0.74 
   7   6  -7    0.89    0.53 
  -7   7  -7    0.07    0.38 
  -6   7  -7    4.01    0.56 
  -5   7  -7    7.84    0.69 
  -4   7  -7    0.93    0.34 
  -3   7  -7   23.63    1.07 
  -2   7  -7    3.36    0.53 
  -1   7  -7    3.10    0.40 
   0   7  -7   12.85    0.73 
   1   7  -7   12.79    0.75 
   2   7  -7   15.72    0.83 
   3   7  -7    2.41    0.39 
   4   7  -7    0.03    0.24 
   5   7  -7    1.86    0.53 
   6   7  -7   -0.42    0.35 
   7   7  -7    0.37    0.50 
  -7   8  -7    3.40    1.04 
  -6   8  -7    3.88    0.56 
  -5   8  -7    8.53    0.73 
  -4   8  -7   19.38    1.02 
  -3   8  -7    5.70    0.54 
  -2   8  -7   20.72    1.25 
  -1   8  -7   26.74    1.18 
   0   8  -7   27.96    1.16 
   1   8  -7   20.87    0.98 
   2   8  -7   11.28    0.73 
   3   8  -7    2.00    0.37 
   4   8  -7    9.44    0.71 
   5   8  -7    0.45    0.34 
   6   8  -7    1.74    0.59 
   7   8  -7    2.46    0.68 
  -6   9  -7    0.53    0.39 
  -5   9  -7    2.41    0.48 
  -4   9  -7   -0.23    0.27 
  -3   9  -7   18.79    0.97 
  -2   9  -7   14.02    1.03 
  -1   9  -7    0.80    0.37 
   0   9  -7   13.77    0.79 
   1   9  -7    1.23    0.32 
   2   9  -7    1.45    0.34 
   3   9  -7    0.90    0.33 
   4   9  -7   -0.13    0.27 
   5   9  -7    0.27    0.33 
   6   9  -7    0.53    0.51 
   7   9  -7    0.44    0.54 
  -6  10  -7    0.96    0.43 
  -5  10  -7    1.88    0.45 
  -4  10  -7   25.62    1.21 
  -3  10  -7    7.46    0.63 
  -2  10  -7    8.26    0.82 
  -1  10  -7   36.29    1.72 
   0  10  -7    1.02    0.40 
   1  10  -7   26.53    1.16 
   2  10  -7    1.96    0.38 
   3  10  -7    1.06    0.35 
   4  10  -7   11.98    0.84 
   5  10  -7    1.24    0.40 
   6  10  -7    2.46    0.52 
  -6  11  -7    0.52    0.42 
  -5  11  -7    0.26    0.33 
  -4  11  -7    0.18    0.32 
  -3  11  -7    0.19    0.44 
  -2  11  -7    1.09    0.44 
  -1  11  -7    1.24    0.43 
   0  11  -7    4.55    0.65 
   1  11  -7   -0.07    0.24 
   2  11  -7    0.86    0.34 
   3  11  -7    1.24    0.38 
   4  11  -7    0.98    0.37 
   5  11  -7    0.01    0.33 
   6  11  -7   -0.07    0.35 
  -6  12  -7    2.26    0.83 
  -5  12  -7    0.18    0.35 
  -4  12  -7   32.30    1.42 
  -3  12  -7    6.80    0.82 
  -2  12  -7   31.95    1.69 
  -1  12  -7   38.97    1.89 
   0  12  -7   -0.25    0.34 
   1  12  -7   15.42    1.12 
   2  12  -7   25.63    1.19 
   3  12  -7    1.32    0.39 
   4  12  -7    5.66    0.62 
   5  12  -7    1.84    0.44 
   6  12  -7    1.38    0.47 
  -5  13  -7   -0.10    0.40 
  -4  13  -7   -0.21    0.32 
  -3  13  -7    4.96    0.75 
  -2  13  -7    2.51    0.56 
  -1  13  -7    0.47    0.45 
   0  13  -7    0.08    0.37 
   1  13  -7    0.44    0.40 
   2  13  -7   -0.39    0.35 
   3  13  -7   -0.05    0.32 
   4  13  -7    0.10    0.36 
   5  13  -7    0.11    0.38 
  -5  14  -7    0.47    0.51 
  -4  14  -7   22.71    1.28 
  -3  14  -7    5.16    0.75 
  -2  14  -7   13.59    1.14 
  -1  14  -7   21.73    1.43 
   0  14  -7    1.28    0.47 
   1  14  -7   19.93    1.34 
   2  14  -7   10.66    1.02 
   3  14  -7    3.29    0.54 
   4  14  -7   14.07    0.98 
   5  14  -7    0.53    0.42 
  -4  15  -7    0.81    0.78 
  -3  15  -7    3.99    0.73 
  -2  15  -7    4.63    0.71 
  -1  15  -7    0.26    0.43 
   0  15  -7    0.81    0.47 
   1  15  -7    1.63    0.54 
   2  15  -7   -0.43    0.38 
   3  15  -7   -0.09    0.41 
   4  15  -7   -0.13    0.37 
   5  15  -7    1.24    0.48 
  -4  16  -7    5.83    1.30 
  -3  16  -7    3.91    1.03 
  -2  16  -7    5.82    0.83 
  -1  16  -7    8.64    0.95 
   0  16  -7    1.33    0.53 
   1  16  -7   11.32    1.08 
   2  16  -7    3.64    0.70 
   3  16  -7    5.71    0.84 
   4  16  -7    7.37    0.99 
  -3  17  -7    7.34    1.32 
  -2  17  -7    5.44    1.22 
  -1  17  -7    1.59    0.60 
   0  17  -7   10.61    1.07 
   1  17  -7    2.98    0.71 
   2  17  -7   -0.53    0.43 
   3  17  -7    4.42    0.80 
  -2  18  -7    5.58    1.23 
  -1  18  -7    3.87    1.15 
   0  18  -7    1.86    0.91 
   1  18  -7    6.71    0.90 
   2  18  -7    3.39    0.75 
  -1  19  -7    0.70    0.86 
   0  19  -7    8.56    1.50 
   1  19  -7    0.22    0.83 
  -1 -20  -6    7.84    1.44 
   0 -20  -6    0.74    0.70 
   1 -20  -6    8.61    1.01 
   2 -20  -6    5.47    1.24 
  -3 -19  -6    1.47    0.59 
  -2 -19  -6    1.13    0.53 
  -1 -19  -6    0.62    0.46 
   0 -19  -6    3.01    0.90 
   1 -19  -6    0.15    0.43 
   2 -19  -6    0.97    0.51 
   3 -19  -6    0.55    0.48 
  -3 -18  -6    0.34    0.48 
  -2 -18  -6    9.74    1.01 
  -1 -18  -6   12.93    1.14 
   0 -18  -6   -0.04    0.49 
   1 -18  -6    6.30    0.81 
   2 -18  -6    7.05    0.89 
   3 -18  -6   -0.50    0.36 
   4 -18  -6    0.21    0.44 
  -4 -17  -6   -0.18    0.44 
  -3 -17  -6    8.66    0.96 
  -2 -17  -6    0.65    0.48 
  -1 -17  -6    2.40    0.58 
   0 -17  -6   14.67    1.16 
   1 -17  -6   -0.07    0.32 
   2 -17  -6   10.34    1.01 
   3 -17  -6    3.58    0.67 
   4 -17  -6   -0.04    0.40 
  -5 -16  -6    2.88    1.04 
  -4 -16  -6    2.78    0.65 
  -3 -16  -6    0.75    0.45 
  -2 -16  -6    9.40    0.94 
  -1 -16  -6    4.03    0.66 
   0 -16  -6    0.79    0.34 
   1 -16  -6    2.83    0.43 
   2 -16  -6    1.49    0.48 
   3 -16  -6    1.06    0.45 
   4 -16  -6    3.86    0.69 
   5 -16  -6    0.47    0.49 
  -5 -15  -6    2.36    0.92 
  -4 -15  -6    0.01    0.42 
  -3 -15  -6   12.85    1.11 
  -2 -15  -6   13.06    1.09 
  -1 -15  -6   11.93    1.03 
   0 -15  -6   17.68    0.99 
   1 -15  -6    1.12    0.33 
   2 -15  -6   12.51    1.05 
   3 -15  -6   19.48    1.41 
   4 -15  -6   -0.03    0.37 
   5 -15  -6    3.03    0.67 
  -6 -14  -6   -0.09    0.81 
  -5 -14  -6    4.74    1.08 
  -4 -14  -6    4.00    0.69 
  -3 -14  -6    0.87    0.45 
  -2 -14  -6    0.85    0.43 
  -1 -14  -6    0.75    0.36 
   0 -14  -6    0.67    0.30 
   1 -14  -6    1.42    0.34 
   2 -14  -6    1.38    0.36 
   3 -14  -6    3.01    0.60 
   4 -14  -6   10.23    1.00 
   5 -14  -6    0.37    0.45 
   6 -14  -6    0.35    0.45 
  -6 -13  -6    7.60    0.93 
  -5 -13  -6    9.00    0.95 
  -4 -13  -6    0.00    0.37 
  -3 -13  -6   37.82    1.87 
  -2 -13  -6    8.97    0.88 
  -1 -13  -6   10.57    0.92 
   0 -13  -6   41.92    1.56 
   1 -13  -6   17.78    0.95 
   2 -13  -6    3.00    0.42 
   3 -13  -6   11.72    0.80 
   4 -13  -6    0.01    0.32 
   5 -13  -6    5.38    0.81 
   6 -13  -6   -0.03    0.44 
  -6 -12  -6   -0.07    0.41 
  -5 -12  -6    0.06    0.39 
  -4 -12  -6    0.23    0.29 
  -3 -12  -6    0.22    0.33 
  -2 -12  -6    0.84    0.38 
  -1 -12  -6    6.25    0.74 
   0 -12  -6   -0.11    0.23 
   1 -12  -6    0.74    0.28 
   2 -12  -6    0.44    0.25 
   3 -12  -6    0.90    0.30 
   4 -12  -6   -0.06    0.36 
   5 -12  -6    0.11    0.40 
   6 -12  -6   -0.50    0.38 
  -6 -11  -6    6.06    0.81 
  -5 -11  -6   16.53    1.21 
  -4 -11  -6    1.45    0.35 
  -3 -11  -6   29.19    1.22 
  -2 -11  -6   30.64    1.56 
  -1 -11  -6   38.62    1.78 
   0 -11  -6   30.70    1.23 
   1 -11  -6    0.34    0.25 
   2 -11  -6   20.26    0.99 
   3 -11  -6   12.34    0.79 
   4 -11  -6    1.08    0.35 
   5 -11  -6   27.65    1.64 
   6 -11  -6    0.69    0.49 
   7 -11  -6    2.32    0.67 
  -7 -10  -6   -0.73    0.39 
  -6 -10  -6    0.52    0.45 
  -5 -10  -6    0.24    0.37 
  -4 -10  -6    4.62    0.53 
  -3 -10  -6    8.85    0.63 
  -2 -10  -6    2.54    0.36 
  -1 -10  -6   -0.23    0.20 
   0 -10  -6    4.91    0.48 
   1 -10  -6    0.22    0.24 
   2 -10  -6    0.17    0.25 
   3 -10  -6    4.58    0.49 
   4 -10  -6    7.40    0.64 
   5 -10  -6    0.42    0.39 
   6 -10  -6    1.01    0.50 
   7 -10  -6    0.15    0.46 
  -7  -9  -6    0.20    0.38 
  -6  -9  -6   22.06    1.50 
  -5  -9  -6    9.71    0.93 
  -4  -9  -6    5.32    0.67 
  -3  -9  -6   51.99    1.46 
  -2  -9  -6   19.81    0.90 
  -1  -9  -6    7.33    0.46 
   0  -9  -6   55.95    1.49 
   1  -9  -6   25.70    1.08 
   2  -9  -6   52.04    1.48 
   3  -9  -6   35.36    1.38 
   4  -9  -6    8.85    0.69 
   5  -9  -6   15.39    0.93 
   6  -9  -6    3.64    0.70 
   7  -9  -6    0.49    0.50 
  -7  -8  -6   11.49    0.92 
  -6  -8  -6    3.64    0.53 
  -5  -8  -6    0.36    0.38 
  -4  -8  -6   10.56    0.91 
  -3  -8  -6    8.43    0.59 
  -2  -8  -6    5.59    0.46 
  -1  -8  -6   27.43    0.88 
   0  -8  -6    5.11    0.38 
   1  -8  -6    0.97    0.27 
   2  -8  -6    0.88    0.27 
   3  -8  -6   -0.04    0.23 
   4  -8  -6    5.41    0.53 
   5  -8  -6    0.67    0.33 
   6  -8  -6    4.44    0.57 
   7  -8  -6    0.42    0.44 
  -7  -7  -6   -0.17    0.34 
  -6  -7  -6   19.74    1.11 
  -5  -7  -6   26.67    1.24 
  -4  -7  -6    8.11    0.61 
  -3  -7  -6   36.89    1.00 
  -2  -7  -6   13.42    0.72 
  -1  -7  -6   10.15    0.52 
   0  -7  -6   88.01    1.78 
   1  -7  -6   21.03    0.76 
   2  -7  -6   32.27    1.25 
   3  -7  -6    7.13    0.58 
   4  -7  -6    1.30    0.34 
   5  -7  -6    3.81    0.52 
   6  -7  -6    0.36    0.32 
   7  -7  -6    0.66    0.46 
  -7  -6  -6    4.12    0.59 
  -6  -6  -6    1.05    0.36 
  -5  -6  -6    7.97    0.65 
  -4  -6  -6   11.91    0.74 
  -3  -6  -6    0.63    0.21 
  -2  -6  -6   12.02    0.55 
  -1  -6  -6   33.00    0.89 
   0  -6  -6    4.23    0.34 
   1  -6  -6   48.53    1.13 
   2  -6  -6    9.70    0.52 
   3  -6  -6   13.53    0.80 
   4  -6  -6   22.11    1.06 
   5  -6  -6    0.10    0.27 
   6  -6  -6    3.23    0.49 
   7  -6  -6    0.28    0.35 
   8  -6  -6    0.41    0.52 
  -8  -5  -6    3.30    0.74 
  -7  -5  -6    1.27    0.43 
  -6  -5  -6    0.05    0.31 
  -5  -5  -6    5.54    0.55 
  -4  -5  -6    0.76    0.28 
  -3  -5  -6   19.22    0.72 
  -2  -5  -6    7.89    0.44 
  -1  -5  -6   19.75    0.72 
   0  -5  -6   45.14    1.07 
   1  -5  -6   19.10    0.73 
   2  -5  -6   19.95    0.75 
   3  -5  -6    8.45    0.50 
   4  -5  -6    1.36    0.34 
   5  -5  -6    1.85    0.38 
   6  -5  -6    1.14    0.37 
   7  -5  -6    0.55    0.37 
   8  -5  -6    2.59    0.67 
  -8  -4  -6    0.30    0.41 
  -7  -4  -6    1.47    0.42 
  -6  -4  -6    1.28    0.36 
  -5  -4  -6   33.55    1.36 
  -4  -4  -6   19.02    0.91 
  -3  -4  -6    1.23    0.28 
  -2  -4  -6   64.79    1.37 
  -1  -4  -6   89.59    1.72 
   0  -4  -6    3.85    0.31 
   1  -4  -6   87.47    1.77 
   2  -4  -6   18.05    0.72 
   3  -4  -6    8.74    0.53 
   4  -4  -6   28.23    1.01 
   5  -4  -6    0.49    0.28 
   6  -4  -6    1.83    0.41 
   7  -4  -6    1.07    0.40 
   8  -4  -6    0.12    0.48 
  -8  -3  -6    0.46    0.53 
  -7  -3  -6    0.14    0.34 
  -6  -3  -6    1.25    0.37 
  -5  -3  -6    1.79    0.37 
  -4  -3  -6    0.83    0.28 
  -3  -3  -6   34.50    1.14 
  -2  -3  -6    1.11    0.20 
  -1  -3  -6   -0.08    0.13 
   0  -3  -6   15.76    0.73 
   1  -3  -6   14.00    0.60 
   2  -3  -6    7.94    0.47 
   3  -3  -6   11.20    0.59 
   4  -3  -6   -0.02    0.20 
   5  -3  -6   -0.30    0.20 
   6  -3  -6    7.27    0.68 
   7  -3  -6    4.77    0.73 
   8  -3  -6    0.60    0.49 
  -8  -2  -6    0.15    0.54 
  -7  -2  -6   10.90    0.86 
  -6  -2  -6    6.66    0.64 
  -5  -2  -6    4.14    0.49 
  -4  -2  -6   77.03    1.97 
  -3  -2  -6    4.00    0.40 
  -2  -2  -6   91.60    1.79 
  -1  -2  -6   58.30    1.23 
   0  -2  -6    2.24    0.22 
   1  -2  -6  116.83    2.57 
   2  -2  -6   21.57    0.90 
   3  -2  -6    8.45    0.51 
   4  -2  -6   12.91    0.67 
   5  -2  -6    1.12    0.33 
   6  -2  -6    6.68    0.62 
   7  -2  -6    4.49    0.73 
   8  -2  -6    1.20    0.54 
  -8  -1  -6   -0.53    0.44 
  -7  -1  -6    0.22    0.42 
  -6  -1  -6   -0.11    0.28 
  -5  -1  -6    6.32    0.57 
  -4  -1  -6    1.98    0.33 
  -3  -1  -6    0.96    0.27 
  -2  -1  -6    1.95    0.23 
  -1  -1  -6    1.05    0.19 
   0  -1  -6    0.90    0.17 
   1  -1  -6   16.83    0.57 
   2  -1  -6    0.64    0.23 
   3  -1  -6    1.15    0.27 
   4  -1  -6    0.44    0.28 
   5  -1  -6    0.00    0.24 
   6  -1  -6    0.01    0.29 
   7  -1  -6   -0.02    0.31 
   8  -1  -6    0.56    0.50 
  -8   0  -6    1.17    0.59 
  -7   0  -6   11.42    1.09 
  -6   0  -6   29.41    1.30 
  -5   0  -6    0.40    0.26 
  -4   0  -6   80.13    2.00 
  -3   0  -6    0.14    0.21 
  -2   0  -6   42.34    0.98 
  -1   0  -6   43.52    1.00 
   0   0  -6    5.74    0.34 
   1   0  -6   53.61    1.16 
   2   0  -6   49.35    1.12 
   3   0  -6   45.58    1.34 
   4   0  -6   20.04    0.98 
   5   0  -6    0.56    0.29 
   6   0  -6    7.72    0.68 
   7   0  -6    6.58    0.65 
   8   0  -6   -0.11    0.36 
  -8   1  -6   -0.20    0.48 
  -7   1  -6   -0.14    0.41 
  -6   1  -6    0.14    0.37 
  -5   1  -6    7.37    0.60 
  -4   1  -6    0.92    0.29 
  -3   1  -6    0.82    0.26 
  -2   1  -6    1.80    0.29 
  -1   1  -6    0.61    0.17 
   0   1  -6    1.07    0.20 
   1   1  -6   19.06    0.63 
   2   1  -6    1.02    0.20 
   3   1  -6    2.88    0.33 
   4   1  -6    0.24    0.26 
   5   1  -6   -0.04    0.26 
   6   1  -6    0.20    0.30 
   7   1  -6   -0.15    0.31 
   8   1  -6    0.93    0.49 
  -8   2  -6    0.39    0.52 
  -7   2  -6   12.50    1.13 
  -6   2  -6    6.70    0.77 
  -5   2  -6    3.70    0.46 
  -4   2  -6   81.70    1.99 
  -3   2  -6    3.51    0.38 
  -2   2  -6   92.77    2.12 
  -1   2  -6   57.18    1.24 
   0   2  -6    1.78    0.22 
   1   2  -6  117.22    2.20 
   2   2  -6   20.88    0.75 
   3   2  -6    9.01    0.50 
   4   2  -6   11.19    0.75 
   5   2  -6    1.15    0.34 
   6   2  -6    5.82    0.62 
   7   2  -6    3.98    0.55 
   8   2  -6    1.39    0.55 
  -8   3  -6    0.99    0.57 
  -7   3  -6    0.39    0.42 
  -6   3  -6    0.26    0.38 
  -5   3  -6    1.38    0.46 
  -4   3  -6    1.49    0.31 
  -3   3  -6   32.72    1.13 
  -2   3  -6    0.88    0.24 
  -1   3  -6    0.08    0.14 
   0   3  -6   15.19    0.59 
   1   3  -6   15.14    0.60 
   2   3  -6    8.07    0.47 
   3   3  -6   13.93    0.63 
   4   3  -6    0.33    0.21 
   5   3  -6    0.35    0.27 
   6   3  -6    7.08    0.69 
   7   3  -6    4.59    0.72 
   8   3  -6    1.40    0.55 
  -8   4  -6    0.29    0.54 
  -7   4  -6    1.52    0.55 
  -6   4  -6    1.10    0.47 
  -5   4  -6   34.18    1.70 
  -4   4  -6   19.68    1.16 
  -3   4  -6    1.89    0.32 
  -2   4  -6   64.96    1.62 
  -1   4  -6   89.16    1.53 
   0   4  -6    4.03    0.32 
   1   4  -6   90.53    1.78 
   2   4  -6   15.50    0.67 
   3   4  -6    9.91    0.54 
   4   4  -6   27.67    1.02 
   5   4  -6    0.55    0.24 
   6   4  -6    2.79    0.57 
   7   4  -6    0.67    0.47 
   8   4  -6   -0.33    0.44 
  -8   5  -6    1.37    0.88 
  -7   5  -6    2.47    0.62 
  -6   5  -6    0.39    0.42 
  -5   5  -6    5.71    0.73 
  -4   5  -6    0.45    0.34 
  -3   5  -6   16.86    0.80 
  -2   5  -6    7.99    0.45 
  -1   5  -6   19.11    0.68 
   0   5  -6   45.94    1.08 
   1   5  -6   21.69    0.78 
   2   5  -6   17.89    0.73 
   3   5  -6    9.01    0.53 
   4   5  -6    2.68    0.35 
   5   5  -6    2.16    0.39 
   6   5  -6    0.96    0.44 
   7   5  -6    0.33    0.44 
   8   5  -6    2.10    0.63 
  -7   6  -6    5.98    0.68 
  -6   6  -6    1.30    0.50 
  -5   6  -6    9.26    0.87 
  -4   6  -6   12.78    0.78 
  -3   6  -6    0.74    0.27 
  -2   6  -6   11.25    0.54 
  -1   6  -6   31.73    0.87 
   0   6  -6    3.90    0.39 
   1   6  -6   46.11    1.32 
   2   6  -6    8.28    0.57 
   3   6  -6   13.96    0.78 
   4   6  -6   21.23    1.01 
   5   6  -6   -0.04    0.26 
   6   6  -6    4.18    0.52 
   7   6  -6    0.21    0.43 
   8   6  -6   -0.33    0.46 
  -7   7  -6    0.07    0.35 
  -6   7  -6   21.44    1.15 
  -5   7  -6   27.31    1.24 
  -4   7  -6    6.73    0.58 
  -3   7  -6   38.18    1.36 
  -2   7  -6   15.82    0.77 
  -1   7  -6    9.76    0.49 
   0   7  -6   90.59    2.09 
   1   7  -6   22.67    0.95 
   2   7  -6   33.03    1.16 
   3   7  -6    5.84    0.53 
   4   7  -6    0.48    0.29 
   5   7  -6    3.43    0.48 
   6   7  -6    0.09    0.29 
   7   7  -6    0.10    0.45 
  -7   8  -6   11.31    0.90 
  -6   8  -6    4.07    0.54 
  -5   8  -6    0.53    0.32 
  -4   8  -6   12.22    0.78 
  -3   8  -6    7.73    0.59 
  -2   8  -6    4.45    0.44 
  -1   8  -6   28.82    0.87 
   0   8  -6    5.63    0.49 
   1   8  -6    0.92    0.27 
   2   8  -6    0.40    0.26 
   3   8  -6    0.04    0.23 
   4   8  -6    4.86    0.53 
   5   8  -6    1.49    0.38 
   6   8  -6    3.70    0.54 
   7   8  -6    0.49    0.37 
  -7   9  -6    0.27    0.39 
  -6   9  -6   22.12    1.19 
  -5   9  -6   10.56    0.79 
  -4   9  -6    5.00    0.53 
  -3   9  -6   49.88    1.46 
  -2   9  -6   20.30    0.92 
  -1   9  -6    7.89    0.53 
   0   9  -6   51.68    1.46 
   1   9  -6   26.43    1.09 
   2   9  -6   52.38    1.49 
   3   9  -6   35.49    1.36 
   4   9  -6    8.85    0.68 
   5   9  -6   14.75    0.94 
   6   9  -6    4.70    0.59 
   7   9  -6    1.00    0.42 
  -7  10  -6    0.28    0.44 
  -6  10  -6    0.17    0.36 
  -5  10  -6    0.12    0.30 
  -4  10  -6    4.61    0.51 
  -3  10  -6    8.42    0.65 
  -2  10  -6    2.48    0.38 
  -1  10  -6    0.53    0.24 
   0  10  -6    5.08    0.48 
   1  10  -6   -0.08    0.23 
   2  10  -6    1.23    0.33 
   3  10  -6    5.57    0.55 
   4  10  -6    7.66    0.66 
   5  10  -6    0.45    0.34 
   6  10  -6    1.56    0.45 
   7  10  -6   -0.40    0.33 
  -6  11  -6    7.78    0.76 
  -5  11  -6   17.10    1.02 
  -4  11  -6    1.83    0.41 
  -3  11  -6   31.09    1.26 
  -2  11  -6   28.87    1.17 
  -1  11  -6   37.57    1.30 
   0  11  -6   29.70    1.52 
   1  11  -6    0.45    0.27 
   2  11  -6   20.49    1.01 
   3  11  -6   14.50    0.87 
   4  11  -6    1.20    0.37 
   5  11  -6   28.94    1.37 
   6  11  -6    0.58    0.38 
   7  11  -6    1.30    0.47 
  -6  12  -6    0.68    0.48 
  -5  12  -6    0.31    0.32 
  -4  12  -6    0.67    0.34 
  -3  12  -6   -0.32    0.26 
  -2  12  -6    1.14    0.33 
  -1  12  -6    5.59    0.68 
   0  12  -6    0.02    0.31 
   1  12  -6    0.93    0.40 
   2  12  -6    0.34    0.27 
   3  12  -6    2.01    0.41 
   4  12  -6    0.91    0.35 
   5  12  -6   -0.21    0.30 
   6  12  -6    0.23    0.37 
  -6  13  -6    7.83    0.96 
  -5  13  -6   12.01    1.09 
  -4  13  -6    0.29    0.33 
  -3  13  -6   38.46    1.47 
  -2  13  -6   10.70    0.74 
  -1  13  -6   12.08    0.98 
   0  13  -6   48.39    2.09 
   1  13  -6   18.84    1.25 
   2  13  -6    3.41    0.48 
   3  13  -6   14.05    0.90 
   4  13  -6    0.29    0.33 
   5  13  -6    5.38    0.65 
   6  13  -6    0.34    0.38 
  -6  14  -6   -0.14    0.47 
  -5  14  -6    4.50    0.74 
  -4  14  -6    4.00    0.68 
  -3  14  -6    0.48    0.33 
  -2  14  -6    0.71    0.32 
  -1  14  -6    0.22    0.37 
   0  14  -6    1.08    0.43 
   1  14  -6    1.87    0.51 
   2  14  -6    1.21    0.46 
   3  14  -6    4.66    0.57 
   4  14  -6   14.68    0.97 
   5  14  -6    0.37    0.39 
   6  14  -6    0.12    0.41 
  -5  15  -6    2.72    0.63 
  -4  15  -6   -0.35    0.35 
  -3  15  -6   15.92    1.17 
  -2  15  -6   13.75    0.86 
  -1  15  -6    9.80    0.94 
   0  15  -6   19.25    1.29 
   1  15  -6    1.44    0.52 
   2  15  -6   15.50    1.17 
   3  15  -6   16.51    1.28 
   4  15  -6    0.32    0.37 
   5  15  -6    3.03    0.57 
  -5  16  -6    2.80    0.71 
  -4  16  -6    2.91    0.65 
  -3  16  -6    0.91    0.44 
  -2  16  -6    9.34    0.97 
  -1  16  -6    6.11    0.79 
   0  16  -6    1.48    0.54 
   1  16  -6    3.21    0.58 
   2  16  -6    3.21    0.64 
   3  16  -6    0.78    0.50 
   4  16  -6    4.94    0.64 
   5  16  -6    0.30    0.40 
  -4  17  -6    0.50    0.49 
  -3  17  -6   11.57    1.06 
  -2  17  -6    1.62    0.74 
  -1  17  -6    3.37    0.94 
   0  17  -6   17.08    1.26 
   1  17  -6   -0.17    0.42 
   2  17  -6   12.57    1.11 
   3  17  -6    4.60    0.79 
   4  17  -6    0.63    0.52 
  -3  18  -6    0.28    0.47 
  -2  18  -6   11.00    1.58 
  -1  18  -6   14.63    1.79 
   0  18  -6   -0.16    0.61 
   1  18  -6    7.61    0.92 
   2  18  -6    7.49    0.96 
   3  18  -6   -0.11    0.49 
   4  18  -6    0.29    0.52 
  -3  19  -6    1.11    0.69 
  -2  19  -6   -0.47    0.63 
  -1  19  -6    0.49    0.68 
   0  19  -6    2.25    0.92 
   1  19  -6    0.57    0.72 
   2  19  -6    2.34    0.66 
   3  19  -6    0.43    0.54 
  -1  20  -6    7.30    1.42 
   0  20  -6    0.36    0.76 
   1  20  -6    9.91    1.54 
  -1 -21  -5    3.20    1.00 
   0 -21  -5    9.08    1.44 
   1 -21  -5   -0.09    0.39 
   2 -21  -5    7.79    0.98 
  -3 -20  -5   -0.18    0.44 
  -2 -20  -5    4.18    0.75 
  -1 -20  -5    1.01    0.77 
   0 -20  -5   -0.24    0.52 
   1 -20  -5    1.47    0.50 
   2 -20  -5   -0.06    0.40 
   3 -20  -5    0.94    0.51 
  -4 -19  -5    3.46    0.74 
  -3 -19  -5    3.73    0.72 
  -2 -19  -5    1.50    0.50 
  -1 -19  -5    2.78    0.84 
   0 -19  -5    8.29    0.89 
   1 -19  -5    0.32    0.38 
   2 -19  -5    6.89    0.87 
   3 -19  -5    0.35    0.42 
   4 -19  -5    0.22    0.38 
  -4 -18  -5    2.13    0.61 
  -3 -18  -5   -0.11    0.40 
  -2 -18  -5    8.61    0.93 
  -1 -18  -5   12.96    1.09 
   0 -18  -5    1.89    0.53 
   1 -18  -5    9.63    0.97 
   2 -18  -5    3.76    0.65 
   3 -18  -5    0.91    0.44 
   4 -18  -5   -0.11    0.34 
  -5 -17  -5    3.07    0.70 
  -4 -17  -5    0.86    0.50 
  -3 -17  -5    8.55    0.93 
  -2 -17  -5    1.15    0.47 
  -1 -17  -5    3.65    0.63 
   0 -17  -5   14.21    0.88 
   1 -17  -5    0.45    0.41 
   2 -17  -5    1.19    0.45 
   3 -17  -5    0.14    0.32 
   4 -17  -5   -0.17    0.29 
   5 -17  -5    4.29    0.62 
  -5 -16  -5    5.28    0.80 
  -4 -16  -5    8.94    0.97 
  -3 -16  -5    0.41    0.41 
  -2 -16  -5   15.13    1.17 
  -1 -16  -5    7.23    0.78 
   0 -16  -5    3.86    0.47 
   1 -16  -5   25.94    1.50 
   2 -16  -5    0.53    0.37 
   3 -16  -5    3.24    0.50 
   4 -16  -5    5.15    0.62 
   5 -16  -5    0.05    0.33 
   6 -16  -5    3.78    1.42 
  -6 -15  -5    3.76    1.08 
  -5 -15  -5    1.49    0.50 
  -4 -15  -5    2.11    0.55 
  -3 -15  -5    4.11    0.63 
  -2 -15  -5   -0.08    0.31 
  -1 -15  -5    3.31    0.58 
   0 -15  -5    9.88    0.70 
   1 -15  -5    0.12    0.25 
   2 -15  -5    8.97    0.89 
   3 -15  -5   19.06    1.06 
   4 -15  -5   -0.06    0.28 
   5 -15  -5    0.26    0.34 
   6 -15  -5    0.69    0.41 
  -6 -14  -5    2.06    0.58 
  -5 -14  -5    7.09    0.67 
  -4 -14  -5   19.47    1.32 
  -3 -14  -5    1.16    0.44 
  -2 -14  -5   14.53    1.07 
  -1 -14  -5   21.31    1.04 
   0 -14  -5    4.35    0.47 
   1 -14  -5   20.96    1.00 
   2 -14  -5   -0.11    0.22 
   3 -14  -5   15.13    0.94 
   4 -14  -5    5.95    0.64 
   5 -14  -5    0.22    0.34 
   6 -14  -5    6.78    0.75 
  -6 -13  -5   -0.03    0.40 
  -5 -13  -5    0.12    0.29 
  -4 -13  -5    0.11    0.26 
  -3 -13  -5    4.40    0.64 
  -2 -13  -5    0.51    0.34 
  -1 -13  -5    3.14    0.40 
   0 -13  -5    1.49    0.32 
   1 -13  -5    0.65    0.27 
   2 -13  -5    5.87    0.53 
   3 -13  -5    6.23    0.73 
   4 -13  -5    0.15    0.28 
   5 -13  -5    0.92    0.37 
   6 -13  -5    0.01    0.34 
   7 -13  -5    0.40    0.41 
  -7 -12  -5    8.50    1.00 
  -6 -12  -5    4.84    0.75 
  -5 -12  -5   14.12    1.00 
  -4 -12  -5   36.23    1.40 
  -3 -12  -5    1.45    0.34 
  -2 -12  -5   44.98    1.94 
  -1 -12  -5   26.44    1.09 
   0 -12  -5    4.57    0.46 
   1 -12  -5   66.77    1.75 
   2 -12  -5    2.70    0.37 
   3 -12  -5    9.48    0.67 
   4 -12  -5   22.18    1.14 
   5 -12  -5    0.50    0.32 
   6 -12  -5   11.19    0.86 
   7 -12  -5    1.07    0.43 
  -7 -11  -5    0.17    0.46 
  -6 -11  -5    0.35    0.41 
  -5 -11  -5    0.42    0.37 
  -4 -11  -5    0.46    0.28 
  -3 -11  -5    0.26    0.24 
  -2 -11  -5    6.02    0.49 
  -1 -11  -5    6.05    0.50 
   0 -11  -5    3.49    0.41 
   1 -11  -5    2.95    0.37 
   2 -11  -5    3.20    0.40 
   3 -11  -5    1.26    0.31 
   4 -11  -5    1.66    0.34 
   5 -11  -5    0.38    0.31 
   6 -11  -5   -0.04    0.32 
   7 -11  -5   -0.59    0.32 
  -7 -10  -5    6.58    0.88 
  -6 -10  -5    2.25    0.53 
  -5 -10  -5   18.32    1.25 
  -4 -10  -5   21.20    1.00 
  -3 -10  -5    1.55    0.32 
  -2 -10  -5   92.56    2.14 
  -1 -10  -5   32.05    0.95 
   0 -10  -5   46.22    1.31 
   1 -10  -5   80.08    1.95 
   2 -10  -5   18.16    0.89 
   3 -10  -5   33.18    1.27 
   4 -10  -5   72.85    1.89 
   5 -10  -5    4.26    0.54 
   6 -10  -5    4.37    0.57 
   7 -10  -5    3.61    0.57 
  -7  -9  -5    0.91    0.51 
  -6  -9  -5    1.38    0.47 
  -5  -9  -5    3.37    0.56 
  -4  -9  -5   -0.08    0.21 
  -3  -9  -5    2.83    0.39 
  -2  -9  -5    1.29    0.28 
  -1  -9  -5   19.84    0.71 
   0  -9  -5   10.71    0.49 
   1  -9  -5    0.12    0.21 
   2  -9  -5    2.38    0.34 
   3  -9  -5    8.51    0.61 
   4  -9  -5    0.80    0.31 
   5  -9  -5    1.92    0.38 
   6  -9  -5   -0.07    0.30 
   7  -9  -5    0.68    0.46 
   8  -9  -5   -0.08    0.62 
  -8  -8  -5    2.25    0.54 
  -7  -8  -5   20.22    1.45 
  -6  -8  -5    0.87    0.46 
  -5  -8  -5   11.49    0.95 
  -4  -8  -5   46.56    1.41 
  -3  -8  -5    0.63    0.25 
  -2  -8  -5   36.08    1.16 
  -1  -8  -5   64.48    1.35 
   0  -8  -5   11.39    0.51 
   1  -8  -5  102.31    1.96 
   2  -8  -5   34.77    1.20 
   3  -8  -5   20.95    0.94 
   4  -8  -5   14.91    0.84 
   5  -8  -5    0.56    0.29 
   6  -8  -5    2.99    0.58 
   7  -8  -5    0.90    0.46 
   8  -8  -5    0.25    0.47 
  -8  -7  -5    3.90    0.62 
  -7  -7  -5    0.29    0.42 
  -6  -7  -5    5.46    0.74 
  -5  -7  -5   12.58    0.98 
  -4  -7  -5    7.83    0.57 
  -3  -7  -5   11.20    0.66 
  -2  -7  -5   10.40    0.60 
  -1  -7  -5   26.29    0.76 
   0  -7  -5   37.04    0.89 
   1  -7  -5    2.15    0.23 
   2  -7  -5   44.06    1.02 
   3  -7  -5    1.02    0.27 
   4  -7  -5    4.46    0.47 
   5  -7  -5   20.09    1.01 
   6  -7  -5    0.48    0.30 
   7  -7  -5    0.45    0.46 
   8  -7  -5    0.20    0.47 
  -8  -6  -5    0.08    0.39 
  -7  -6  -5    7.48    0.72 
  -6  -6  -5    1.21    0.44 
  -5  -6  -5    7.23    0.74 
  -4  -6  -5   13.87    0.84 
  -3  -6  -5    0.91    0.25 
  -2  -6  -5   83.18    1.62 
  -1  -6  -5   23.69    0.62 
   0  -6  -5    0.50    0.15 
   1  -6  -5   40.24    0.94 
   2  -6  -5    5.85    0.37 
   3  -6  -5    5.45    0.38 
   4  -6  -5    5.63    0.52 
   5  -6  -5   14.19    0.84 
   6  -6  -5    2.30    0.41 
   7  -6  -5    4.80    0.73 
   8  -6  -5    2.43    0.62 
  -8  -5  -5    6.28    0.72 
  -7  -5  -5    0.50    0.36 
  -6  -5  -5   43.84    1.64 
  -5  -5  -5   11.34    0.74 
  -4  -5  -5    3.20    0.52 
  -3  -5  -5   60.78    1.56 
  -2  -5  -5   41.02    0.93 
  -1  -5  -5   35.33    0.73 
   0  -5  -5   52.52    0.96 
   1  -5  -5   19.23    0.65 
   2  -5  -5  109.18    2.05 
   3  -5  -5   23.20    0.75 
   4  -5  -5   27.40    0.95 
   5  -5  -5   19.32    0.96 
   6  -5  -5    3.79    0.51 
   7  -5  -5    0.57    0.36 
   8  -5  -5    4.74    0.78 
  -8  -4  -5    0.34    0.39 
  -7  -4  -5    0.23    0.32 
  -6  -4  -5    1.57    0.37 
  -5  -4  -5    0.06    0.24 
  -4  -4  -5   21.60    0.95 
  -3  -4  -5   24.37    0.75 
  -2  -4  -5   58.72    1.23 
  -1  -4  -5    6.54    0.30 
   0  -4  -5    9.53    0.32 
   1  -4  -5    2.99    0.26 
   2  -4  -5    0.16    0.15 
   3  -4  -5   26.20    0.83 
   4  -4  -5    8.57    0.52 
   5  -4  -5    0.21    0.20 
   6  -4  -5    7.59    0.65 
   7  -4  -5   -0.11    0.31 
   8  -4  -5    0.21    0.44 
  -8  -3  -5    4.00    0.60 
  -7  -3  -5    5.25    0.60 
  -6  -3  -5   41.58    1.57 
  -5  -3  -5   40.26    1.38 
  -4  -3  -5    0.09    0.22 
  -3  -3  -5  158.34    2.83 
  -2  -3  -5   30.56    0.76 
  -1  -3  -5   45.59    1.10 
   0  -3  -5  159.34    2.46 
   1  -3  -5    0.43    0.15 
   2  -3  -5   27.64    0.82 
   3  -3  -5   34.12    0.94 
   4  -3  -5    3.91    0.35 
   5  -3  -5    9.74    0.58 
   6  -3  -5    0.11    0.24 
   7  -3  -5    7.14    0.68 
   8  -3  -5    2.79    0.62 
  -8  -2  -5    2.51    0.66 
  -7  -2  -5   -0.03    0.30 
  -6  -2  -5    0.16    0.27 
  -5  -2  -5   20.47    0.95 
  -4  -2  -5   19.70    0.87 
  -3  -2  -5    0.24    0.15 
  -2  -2  -5   23.19    0.66 
  -1  -2  -5    0.32    0.13 
   0  -2  -5    1.93    0.18 
   1  -2  -5   14.40    0.42 
   2  -2  -5   13.99    0.44 
   3  -2  -5    0.33    0.19 
   4  -2  -5    0.08    0.18 
   5  -2  -5    0.61    0.25 
   6  -2  -5    0.21    0.24 
   7  -2  -5    0.18    0.30 
   8  -2  -5    0.29    0.44 
  -8  -1  -5    6.36    0.86 
  -7  -1  -5    0.79    0.36 
  -6  -1  -5    0.42    0.30 
  -5  -1  -5    5.21    0.50 
  -4  -1  -5   31.48    1.17 
  -3  -1  -5   91.78    2.07 
  -2  -1  -5    0.88    0.16 
  -1  -1  -5  110.07    1.98 
   0  -1  -5   74.99    1.45 
   1  -1  -5   24.03    0.66 
   2  -1  -5   90.59    1.69 
   3  -1  -5   41.38    0.88 
   4  -1  -5    5.83    0.38 
   5  -1  -5   26.19    1.14 
   6  -1  -5    0.22    0.27 
   7  -1  -5    2.51    0.44 
   8  -1  -5    1.58    0.45 
  -8   0  -5   -0.02    0.44 
  -7   0  -5   -0.11    0.36 
  -6   0  -5   -0.31    0.23 
  -5   0  -5    0.01    0.23 
  -4   0  -5    0.12    0.21 
  -3   0  -5    0.03    0.18 
  -2   0  -5    0.02    0.11 
  -1   0  -5    0.10    0.12 
   0   0  -5   -0.07    0.11 
   1   0  -5   -0.03    0.10 
   2   0  -5   -0.05    0.12 
   3   0  -5    0.20    0.15 
   4   0  -5    0.00    0.17 
   5   0  -5   -0.02    0.25 
   6   0  -5   -0.23    0.25 
   7   0  -5   -0.06    0.30 
   8   0  -5   -0.14    0.38 
  -8   1  -5    5.50    0.86 
  -7   1  -5    1.31    0.52 
  -6   1  -5    0.35    0.31 
  -5   1  -5    4.83    0.49 
  -4   1  -5   31.83    1.09 
  -3   1  -5   88.89    2.06 
  -2   1  -5    1.49    0.18 
  -1   1  -5  108.68    1.98 
   0   1  -5   76.08    1.47 
   1   1  -5   25.55    0.71 
   2   1  -5   88.05    1.71 
   3   1  -5   42.16    1.00 
   4   1  -5    5.80    0.42 
   5   1  -5   27.87    0.99 
   6   1  -5    0.10    0.27 
   7   1  -5    2.08    0.46 
   8   1  -5    1.89    0.55 
  -8   2  -5    2.26    0.66 
  -7   2  -5    0.28    0.42 
  -6   2  -5    0.01    0.33 
  -5   2  -5   16.60    0.86 
  -4   2  -5   17.91    0.83 
  -3   2  -5    0.19    0.18 
  -2   2  -5   23.37    0.67 
  -1   2  -5    0.21    0.13 
   0   2  -5    2.28    0.22 
   1   2  -5   16.48    0.58 
   2   2  -5   15.67    0.58 
   3   2  -5    0.51    0.18 
   4   2  -5    0.32    0.20 
   5   2  -5    0.59    0.24 
   6   2  -5    0.26    0.24 
   7   2  -5    0.77    0.42 
   8   2  -5   -0.41    0.38 
  -8   3  -5    3.88    0.76 
  -7   3  -5    5.59    0.79 
  -6   3  -5   41.34    1.96 
  -5   3  -5   44.21    1.87 
  -4   3  -5    0.70    0.24 
  -3   3  -5  156.73    3.29 
  -2   3  -5   31.45    0.74 
  -1   3  -5   45.80    0.99 
   0   3  -5  158.13    2.45 
   1   3  -5    0.29    0.14 
   2   3  -5   27.28    0.82 
   3   3  -5   33.08    0.97 
   4   3  -5    4.83    0.41 
   5   3  -5    9.32    0.58 
   6   3  -5    0.08    0.25 
   7   3  -5    6.98    0.81 
   8   3  -5    1.91    0.58 
  -8   4  -5    0.27    0.48 
  -7   4  -5   -0.15    0.36 
  -6   4  -5    1.59    0.46 
  -5   4  -5    0.58    0.34 
  -4   4  -5   22.49    0.93 
  -3   4  -5   23.14    0.90 
  -2   4  -5   57.45    1.44 
  -1   4  -5    6.82    0.32 
   0   4  -5    9.19    0.35 
   1   4  -5    3.74    0.19 
   2   4  -5    0.16    0.15 
   3   4  -5   23.11    0.84 
   4   4  -5    9.52    0.56 
   5   4  -5    0.00    0.23 
   6   4  -5    8.06    0.66 
   7   4  -5    0.26    0.30 
   8   4  -5   -0.25    0.40 
  -8   5  -5    6.06    0.90 
  -7   5  -5    0.53    0.45 
  -6   5  -5   42.25    1.97 
  -5   5  -5   12.90    0.99 
  -4   5  -5    3.91    0.51 
  -3   5  -5   63.78    1.56 
  -2   5  -5   39.40    0.93 
  -1   5  -5   33.70    0.82 
   0   5  -5   53.07    1.09 
   1   5  -5   20.20    0.54 
   2   5  -5  107.27    2.08 
   3   5  -5   19.80    0.78 
   4   5  -5   28.64    1.14 
   5   5  -5   15.88    0.87 
   6   5  -5    2.85    0.44 
   7   5  -5    0.77    0.35 
   8   5  -5    4.66    0.79 
  -8   6  -5    0.93    0.42 
  -7   6  -5    7.39    0.82 
  -6   6  -5    0.44    0.40 
  -5   6  -5    7.52    0.76 
  -4   6  -5   12.97    0.75 
  -3   6  -5    0.70    0.25 
  -2   6  -5   81.29    1.63 
  -1   6  -5   23.77    0.71 
   0   6  -5    0.29    0.14 
   1   6  -5   40.49    0.90 
   2   6  -5    6.96    0.50 
   3   6  -5    5.62    0.48 
   4   6  -5    6.30    0.53 
   5   6  -5   11.47    0.76 
   6   6  -5    2.24    0.41 
   7   6  -5    5.59    0.61 
   8   6  -5    2.22    0.50 
  -8   7  -5    5.73    0.71 
  -7   7  -5    0.57    0.35 
  -6   7  -5    5.49    0.60 
  -5   7  -5   11.02    0.75 
  -4   7  -5    8.45    0.62 
  -3   7  -5   13.97    0.73 
  -2   7  -5    9.48    0.47 
  -1   7  -5   26.83    0.76 
   0   7  -5   36.32    0.87 
   1   7  -5    2.63    0.24 
   2   7  -5   42.34    1.23 
   3   7  -5    0.54    0.24 
   4   7  -5    4.13    0.48 
   5   7  -5   18.04    0.97 
   6   7  -5    0.53    0.34 
   7   7  -5    0.80    0.36 
   8   7  -5    0.62    0.39 
  -8   8  -5    1.96    0.53 
  -7   8  -5   21.54    1.20 
  -6   8  -5    1.65    0.40 
  -5   8  -5   12.21    0.79 
  -4   8  -5   45.06    1.42 
  -3   8  -5    0.99    0.27 
  -2   8  -5   35.21    1.17 
  -1   8  -5   63.23    1.33 
   0   8  -5   10.30    0.48 
   1   8  -5  104.41    1.97 
   2   8  -5   36.28    1.14 
   3   8  -5   21.64    0.96 
   4   8  -5   15.28    0.85 
   5   8  -5    0.90    0.33 
   6   8  -5    3.15    0.49 
   7   8  -5    0.50    0.37 
   8   8  -5    0.67    0.40 
  -7   9  -5    0.77    0.39 
  -6   9  -5    3.23    0.50 
  -5   9  -5    3.69    0.49 
  -4   9  -5    0.08    0.24 
  -3   9  -5    2.65    0.38 
  -2   9  -5    1.46    0.29 
  -1   9  -5   20.57    0.72 
   0   9  -5    9.05    0.47 
   1   9  -5   -0.04    0.16 
   2   9  -5    1.95    0.34 
   3   9  -5    7.22    0.60 
   4   9  -5    1.00    0.32 
   5   9  -5    0.78    0.34 
   6   9  -5   -0.21    0.27 
   7   9  -5    0.93    0.41 
   8   9  -5    0.41    0.43 
  -7  10  -5    7.85    0.96 
  -6  10  -5    2.76    0.47 
  -5  10  -5   17.83    0.99 
  -4  10  -5   22.80    1.07 
  -3  10  -5    2.36    0.37 
  -2  10  -5   89.02    2.15 
  -1  10  -5   33.30    1.12 
   0  10  -5   46.34    1.09 
   1  10  -5   78.84    1.64 
   2  10  -5   18.74    0.90 
   3  10  -5   31.46    1.25 
   4  10  -5   69.34    1.92 
   5  10  -5    5.19    0.58 
   6  10  -5    3.83    0.55 
   7  10  -5    4.44    0.60 
  -7  11  -5   -0.08    0.46 
  -6  11  -5    0.09    0.41 
  -5  11  -5    0.61    0.33 
  -4  11  -5    1.16    0.32 
  -3  11  -5   -0.04    0.24 
  -2  11  -5    6.11    0.52 
  -1  11  -5    5.36    0.48 
   0  11  -5    3.09    0.37 
   1  11  -5    3.57    0.34 
   2  11  -5    3.01    0.40 
   3  11  -5    1.65    0.36 
   4  11  -5    1.98    0.41 
   5  11  -5    0.51    0.35 
   6  11  -5    0.12    0.33 
   7  11  -5   -0.04    0.38 
  -7  12  -5    8.03    0.99 
  -6  12  -5    5.51    0.81 
  -5  12  -5   12.51    1.07 
  -4  12  -5   36.32    1.44 
  -3  12  -5    1.66    0.36 
  -2  12  -5   40.75    1.38 
  -1  12  -5   26.99    1.09 
   0  12  -5    5.11    0.48 
   1  12  -5   67.27    1.56 
   2  12  -5    1.66    0.35 
   3  12  -5    9.42    0.69 
   4  12  -5   19.10    1.06 
   5  12  -5    0.20    0.33 
   6  12  -5   11.86    0.91 
   7  12  -5    0.59    0.51 
  -6  13  -5    0.56    0.45 
  -5  13  -5    0.48    0.40 
  -4  13  -5   -0.22    0.31 
  -3  13  -5    3.69    0.45 
  -2  13  -5    0.28    0.25 
  -1  13  -5    3.09    0.40 
   0  13  -5    1.82    0.34 
   1  13  -5    0.37    0.33 
   2  13  -5    6.51    0.59 
   3  13  -5    8.95    0.71 
   4  13  -5    0.14    0.33 
   5  13  -5    1.47    0.41 
   6  13  -5    0.26    0.38 
   7  13  -5   -0.25    0.48 
  -6  14  -5    0.99    0.56 
  -5  14  -5    8.58    0.93 
  -4  14  -5   23.36    1.45 
  -3  14  -5    1.02    0.41 
  -2  14  -5   16.76    0.91 
  -1  14  -5   24.98    1.08 
   0  14  -5    3.58    0.45 
   1  14  -5   19.05    1.23 
   2  14  -5    0.28    0.28 
   3  14  -5   15.18    0.93 
   4  14  -5    4.27    0.56 
   5  14  -5    0.83    0.38 
   6  14  -5    8.03    0.96 
  -6  15  -5    3.84    0.76 
  -5  15  -5    1.09    0.51 
  -4  15  -5    1.36    0.50 
  -3  15  -5    3.92    0.65 
  -2  15  -5    0.29    0.34 
  -1  15  -5    2.98    0.42 
   0  15  -5    9.90    0.69 
   1  15  -5    0.16    0.36 
   2  15  -5    8.18    0.85 
   3  15  -5   21.94    1.13 
   4  15  -5    0.16    0.33 
   5  15  -5    1.07    0.51 
   6  15  -5    0.56    0.54 
  -5  16  -5    5.22    0.81 
  -4  16  -5   10.13    0.99 
  -3  16  -5    0.00    0.36 
  -2  16  -5   16.66    1.19 
  -1  16  -5    7.44    0.77 
   0  16  -5    4.22    0.51 
   1  16  -5   30.25    1.63 
   2  16  -5    0.43    0.41 
   3  16  -5    2.58    0.59 
   4  16  -5    4.33    0.73 
   5  16  -5    0.05    0.44 
  -5  17  -5    3.76    0.74 
  -4  17  -5    2.23    0.58 
  -3  17  -5    8.15    0.90 
  -2  17  -5    1.24    0.50 
  -1  17  -5    3.85    0.61 
   0  17  -5   14.52    1.14 
   1  17  -5    0.93    0.43 
   2  17  -5    0.83    0.49 
   3  17  -5    0.24    0.43 
   4  17  -5    0.96    0.55 
   5  17  -5    3.85    0.75 
  -4  18  -5    2.79    0.67 
  -3  18  -5   -0.07    0.42 
  -2  18  -5    5.19    0.75 
  -1  18  -5   12.82    1.08 
   0  18  -5    0.59    0.59 
   1  18  -5   11.51    1.52 
   2  18  -5    4.54    0.72 
   3  18  -5    2.46    0.63 
   4  18  -5    0.38    0.49 
  -4  19  -5    3.71    0.74 
  -3  19  -5    4.70    0.77 
  -2  19  -5    3.42    0.63 
  -1  19  -5    3.73    0.66 
   0  19  -5    6.85    1.25 
   1  19  -5    0.08    0.64 
   2  19  -5    6.71    1.28 
   3  19  -5   -0.51    0.44 
   4  19  -5    0.23    0.54 
  -3  20  -5   -0.37    0.45 
  -2  20  -5    4.89    0.78 
  -1  20  -5    1.92    0.59 
   0  20  -5    0.65    0.79 
   1  20  -5    2.47    0.90 
   2  20  -5    0.19    0.66 
   3  20  -5    2.32    0.95 
  -1  21  -5    3.91    1.16 
   0  21  -5   12.43    1.73 
   1  21  -5    0.93    0.80 
   2  21  -5   10.30    1.69 
  -1 -22  -4    5.51    1.34 
   0 -22  -4    3.86    0.69 
   1 -22  -4    7.13    0.89 
  -3 -21  -4    0.94    0.79 
  -2 -21  -4    0.54    0.68 
  -1 -21  -4    0.68    0.70 
   0 -21  -4    0.55    0.43 
   1 -21  -4    0.31    0.40 
   2 -21  -4    1.41    0.54 
   3 -21  -4    0.53    0.37 
  -4 -20  -4    0.38    0.51 
  -3 -20  -4    1.33    0.56 
  -2 -20  -4   17.00    1.92 
  -1 -20  -4    2.34    0.79 
   0 -20  -4    6.66    0.83 
   1 -20  -4   17.58    1.31 
   2 -20  -4    0.20    0.32 
   3 -20  -4    9.54    0.83 
   4 -20  -4    1.65    0.49 
  -4 -19  -4    0.70    0.49 
  -3 -19  -4    9.03    0.98 
  -2 -19  -4    6.16    0.81 
  -1 -19  -4    2.71    0.87 
   0 -19  -4    2.28    0.50 
   1 -19  -4    0.72    0.38 
   2 -19  -4    2.55    0.47 
   3 -19  -4    1.05    0.39 
   4 -19  -4    2.55    0.51 
  -5 -18  -4    7.02    0.93 
  -4 -18  -4    3.67    0.70 
  -3 -18  -4    5.41    0.80 
  -2 -18  -4   24.80    1.51 
  -1 -18  -4    8.11    0.86 
   0 -18  -4    9.01    0.86 
   1 -18  -4   15.23    0.95 
   2 -18  -4    0.78    0.33 
   3 -18  -4    4.14    0.55 
   4 -18  -4    8.89    0.80 
   5 -18  -4    0.54    0.38 
  -5 -17  -4    3.66    0.68 
  -4 -17  -4    2.70    0.59 
  -3 -17  -4   14.95    1.17 
  -2 -17  -4    1.78    0.51 
  -1 -17  -4    9.39    0.69 
   0 -17  -4   14.38    1.07 
   1 -17  -4    6.65    0.63 
   2 -17  -4    3.89    0.52 
   3 -17  -4    0.43    0.32 
   4 -17  -4    1.37    0.40 
   5 -17  -4    3.45    0.55 
   6 -17  -4   -0.04    0.45 
  -6 -16  -4    0.13    0.45 
  -5 -16  -4    4.46    0.75 
  -4 -16  -4    6.45    0.83 
  -3 -16  -4    1.33    0.46 
  -2 -16  -4    9.88    0.94 
  -1 -16  -4    1.59    0.35 
   0 -16  -4    2.44    0.37 
   1 -16  -4    9.85    0.73 
   2 -16  -4    3.12    0.45 
   3 -16  -4    6.08    0.61 
   4 -16  -4    0.33    0.32 
   5 -16  -4    0.32    0.32 
   6 -16  -4   -0.04    0.44 
  -6 -15  -4    5.75    0.67 
  -5 -15  -4    0.79    0.46 
  -4 -15  -4    6.93    0.79 
  -3 -15  -4   17.84    1.21 
  -2 -15  -4   -0.08    0.30 
  -1 -15  -4   37.94    1.41 
   0 -15  -4   24.44    1.04 
   1 -15  -4    9.19    0.56 
   2 -15  -4   41.68    1.53 
   3 -15  -4    9.37    0.73 
   4 -15  -4    9.15    0.75 
   5 -15  -4   11.95    0.88 
   6 -15  -4    0.64    0.39 
  -7 -14  -4    0.49    0.50 
  -6 -14  -4    0.39    0.42 
  -5 -14  -4    0.21    0.31 
  -4 -14  -4    0.94    0.33 
  -3 -14  -4    1.69    0.46 
  -2 -14  -4   -0.09    0.28 
  -1 -14  -4    0.51    0.25 
   0 -14  -4    0.30    0.23 
   1 -14  -4    8.60    0.52 
   2 -14  -4    2.64    0.40 
   3 -14  -4    3.42    0.47 
   4 -14  -4    0.51    0.29 
   5 -14  -4    0.16    0.30 
   6 -14  -4    0.21    0.31 
   7 -14  -4    0.54    0.49 
  -7 -13  -4    0.70    0.50 
  -6 -13  -4    8.45    0.91 
  -5 -13  -4   12.06    0.83 
  -4 -13  -4   36.76    1.42 
  -3 -13  -4   21.14    0.99 
  -2 -13  -4    0.34    0.33 
  -1 -13  -4   37.16    1.20 
   0 -13  -4   46.58    1.33 
   1 -13  -4    0.45    0.21 
   2 -13  -4   78.69    1.71 
   3 -13  -4    7.07    0.61 
   4 -13  -4    7.12    0.62 
   5 -13  -4   12.46    0.87 
   6 -13  -4   -0.19    0.30 
   7 -13  -4    1.65    0.58 
  -7 -12  -4    0.10    0.45 
  -6 -12  -4    0.32    0.40 
  -5 -12  -4    0.70    0.32 
  -4 -12  -4    0.48    0.28 
  -3 -12  -4    1.91    0.34 
  -2 -12  -4    1.70    0.31 
  -1 -12  -4    0.21    0.22 
   0 -12  -4    0.65    0.24 
   1 -12  -4   -0.10    0.20 
   2 -12  -4    3.74    0.36 
   3 -12  -4    3.27    0.37 
   4 -12  -4    0.14    0.26 
   5 -12  -4    1.22    0.35 
   6 -12  -4    0.05    0.29 
   7 -12  -4    0.45    0.46 
  -7 -11  -4    0.95    0.48 
  -6 -11  -4   10.90    0.99 
  -5 -11  -4    9.14    0.70 
  -4 -11  -4    8.95    0.64 
  -3 -11  -4   86.11    2.06 
  -2 -11  -4    1.55    0.30 
  -1 -11  -4   40.29    0.98 
   0 -11  -4   55.37    1.44 
   1 -11  -4    0.68    0.24 
   2 -11  -4   67.05    1.48 
   3 -11  -4   23.62    0.88 
   4 -11  -4    9.32    0.67 
   5 -11  -4    7.67    0.66 
   6 -11  -4    0.91    0.36 
   7 -11  -4    4.54    0.60 
   8 -11  -4   -0.53    0.41 
  -8 -10  -4    0.10    0.47 
  -7 -10  -4    1.66    0.55 
  -6 -10  -4    1.48    0.48 
  -5 -10  -4    2.28    0.37 
  -4 -10  -4   13.03    0.75 
  -3 -10  -4    3.67    0.41 
  -2 -10  -4    0.25    0.17 
  -1 -10  -4    1.48    0.22 
   0 -10  -4    0.20    0.20 
   1 -10  -4    0.63    0.23 
   2 -10  -4    0.37    0.20 
   3 -10  -4    8.32    0.51 
   4 -10  -4    0.37    0.22 
   5 -10  -4    4.40    0.51 
   6 -10  -4    0.93    0.34 
   7 -10  -4    0.57    0.37 
   8 -10  -4    1.54    0.56 
  -8  -9  -4    5.85    0.88 
  -7  -9  -4   -0.04    0.39 
  -6  -9  -4   15.26    1.13 
  -5  -9  -4   11.37    0.72 
  -4  -9  -4    1.95    0.34 
  -3  -9  -4   65.96    1.66 
  -2  -9  -4    0.26    0.16 
  -1  -9  -4   81.07    1.55 
   0  -9  -4   52.85    1.13 
   1  -9  -4    1.12    0.24 
   2  -9  -4   90.69    1.80 
   3  -9  -4    8.79    0.51 
   4  -9  -4    2.63    0.33 
   5  -9  -4   10.01    0.72 
   6  -9  -4    0.89    0.32 
   7  -9  -4    2.68    0.49 
   8  -9  -4    1.79    0.58 
  -8  -8  -4    1.01    0.52 
  -7  -8  -4    0.95    0.46 
  -6  -8  -4   -0.01    0.36 
  -5  -8  -4    7.26    0.56 
  -4  -8  -4   31.63    1.12 
  -3  -8  -4    0.15    0.19 
  -2  -8  -4   35.60    0.86 
  -1  -8  -4   -0.07    0.12 
   0  -8  -4    3.03    0.25 
   1  -8  -4   39.46    0.86 
   2  -8  -4    2.14    0.29 
   3  -8  -4    5.87    0.41 
   4  -8  -4    1.43    0.27 
   5  -8  -4    1.30    0.29 
   6  -8  -4    1.57    0.36 
   7  -8  -4    0.79    0.34 
   8  -8  -4    2.74    0.62 
  -8  -7  -4    3.24    0.69 
  -7  -7  -4    3.90    0.69 
  -6  -7  -4   22.46    1.39 
  -5  -7  -4    4.07    0.58 
  -4  -7  -4   14.60    0.76 
  -3  -7  -4   66.24    1.60 
  -2  -7  -4   12.86    0.51 
  -1  -7  -4   71.10    1.37 
   0  -7  -4  105.77    1.95 
   1  -7  -4   14.39    0.48 
   2  -7  -4   49.07    1.05 
   3  -7  -4    5.01    0.38 
   4  -7  -4    6.81    0.46 
   5  -7  -4    8.30    0.53 
   6  -7  -4   -0.05    0.22 
   7  -7  -4    6.48    0.63 
   8  -7  -4    2.84    0.61 
  -8  -6  -4    0.06    0.47 
  -7  -6  -4    2.92    0.61 
  -6  -6  -4    1.39    0.43 
  -5  -6  -4    0.29    0.28 
  -4  -6  -4    3.69    0.38 
  -3  -6  -4   11.30    0.61 
  -2  -6  -4   37.05    0.85 
  -1  -6  -4    6.47    0.34 
   0  -6  -4   20.67    0.62 
   1  -6  -4  152.52    3.01 
   2  -6  -4    0.08    0.12 
   3  -6  -4   60.00    1.15 
   4  -6  -4   32.76    0.87 
   5  -6  -4    8.68    0.54 
   6  -6  -4    1.25    0.29 
   7  -6  -4    7.71    0.69 
   8  -6  -4    1.05    0.48 
  -8  -5  -4    1.36    0.42 
  -7  -5  -4    0.17    0.37 
  -6  -5  -4    2.78    0.52 
  -5  -5  -4    1.79    0.42 
  -4  -5  -4   35.21    1.06 
  -3  -5  -4   47.10    1.19 
  -2  -5  -4    5.68    0.31 
  -1  -5  -4  164.05    2.86 
   0  -5  -4   21.57    0.54 
   1  -5  -4   28.62    0.68 
   2  -5  -4   27.08    0.74 
   3  -5  -4   16.30    0.61 
   4  -5  -4   21.68    0.70 
   5  -5  -4   57.35    1.19 
   6  -5  -4    1.78    0.31 
   7  -5  -4    2.34    0.37 
   8  -5  -4    1.13    0.50 
  -8  -4  -4    1.11    0.41 
  -7  -4  -4   18.08    1.04 
  -6  -4  -4    1.67    0.44 
  -5  -4  -4    1.26    0.37 
  -4  -4  -4   37.58    1.06 
  -3  -4  -4    0.93    0.21 
  -2  -4  -4   71.61    1.64 
  -1  -4  -4    7.53    0.30 
   0  -4  -4  102.48    1.61 
   1  -4  -4  125.99    2.23 
   2  -4  -4   48.98    1.05 
   3  -4  -4   34.41    0.72 
   4  -4  -4   12.16    0.47 
   5  -4  -4    7.17    0.48 
   6  -4  -4    8.71    0.49 
   7  -4  -4    0.35    0.30 
   8  -4  -4    1.07    0.51 
  -8  -3  -4   -0.05    0.33 
  -7  -3  -4   -0.05    0.29 
  -6  -3  -4   14.28    0.83 
  -5  -3  -4    1.84    0.34 
  -4  -3  -4   20.96    0.82 
  -3  -3  -4    1.29    0.22 
  -2  -3  -4    9.11    0.40 
  -1  -3  -4   22.21    0.49 
   0  -3  -4   32.40    0.63 
   1  -3  -4    1.50    0.18 
   2  -3  -4    0.19    0.08 
   3  -3  -4   19.29    0.55 
   4  -3  -4    0.60    0.16 
   5  -3  -4   25.61    0.80 
   6  -3  -4   10.77    0.62 
   7  -3  -4    0.05    0.23 
   8  -3  -4   -0.09    0.31 
  -9  -2  -4    0.60    0.56 
  -8  -2  -4    5.28    0.79 
  -7  -2  -4   13.59    0.89 
  -6  -2  -4    0.57    0.28 
  -5  -2  -4   85.49    2.12 
  -4  -2  -4   71.49    1.74 
  -3  -2  -4    2.94    0.24 
  -2  -2  -4  156.67    2.74 
  -1  -2  -4  123.87    2.21 
   0  -2  -4  139.27    2.16 
   1  -2  -4  101.25    1.60 
   2  -2  -4    0.81    0.12 
   3  -2  -4   11.44    0.43 
   4  -2  -4   44.70    0.94 
   5  -2  -4   21.94    0.73 
   6  -2  -4   31.13    0.99 
   7  -2  -4    0.39    0.26 
   8  -2  -4    0.85    0.46 
  -9  -1  -4   -0.10    0.46 
  -8  -1  -4    0.21    0.43 
  -7  -1  -4    0.05    0.30 
  -6  -1  -4   32.54    1.31 
  -5  -1  -4    0.58    0.25 
  -4  -1  -4    1.89    0.30 
  -3  -1  -4    7.40    0.35 
  -2  -1  -4    0.60    0.13 
  -1  -1  -4   14.75    0.48 
   0  -1  -4   22.95    0.63 
   1  -1  -4    9.88    0.32 
   2  -1  -4    4.04    0.23 
   3  -1  -4    8.36    0.38 
   4  -1  -4    0.18    0.13 
   5  -1  -4    9.22    0.42 
   6  -1  -4    3.86    0.35 
   7  -1  -4    1.56    0.39 
   8  -1  -4    0.01    0.32 
   9  -1  -4   -0.18    0.58 
  -9   0  -4   -0.02    0.50 
  -8   0  -4   -0.08    0.40 
  -7   0  -4   22.54    1.44 
  -6   0  -4    3.85    0.45 
  -5   0  -4  124.43    2.81 
  -4   0  -4   18.79    0.81 
  -3   0  -4   49.28    1.02 
  -2   0  -4  412.77    6.71 
  -1   0  -4  159.12    2.70 
   0   0  -4   54.81    1.07 
   1   0  -4   85.34    1.57 
   2   0  -4   63.97    1.25 
   3   0  -4  184.38    3.22 
   4   0  -4   82.21    1.45 
   5   0  -4   51.88    1.24 
   6   0  -4   39.50    1.21 
   7   0  -4    2.83    0.39 
   8   0  -4    0.93    0.46 
   9   0  -4    1.59    0.58 
  -9   1  -4    0.07    0.47 
  -8   1  -4    0.26    0.43 
  -7   1  -4   -0.35    0.35 
  -6   1  -4   32.01    1.27 
  -5   1  -4    0.70    0.27 
  -4   1  -4    2.95    0.34 
  -3   1  -4    5.54    0.40 
  -2   1  -4    1.06    0.14 
  -1   1  -4   13.65    0.46 
   0   1  -4   24.97    0.59 
   1   1  -4   11.07    0.42 
   2   1  -4    3.45    0.25 
   3   1  -4   10.20    0.34 
   4   1  -4    0.06    0.13 
   5   1  -4    8.59    0.52 
   6   1  -4    3.08    0.37 
   7   1  -4    1.80    0.37 
   8   1  -4    0.03    0.36 
   9   1  -4    0.05    0.44 
  -9   2  -4   -0.01    0.54 
  -8   2  -4    6.12    0.82 
  -7   2  -4   15.42    1.19 
  -6   2  -4    0.75    0.37 
  -5   2  -4   87.81    2.10 
  -4   2  -4   71.36    1.71 
  -3   2  -4    3.71    0.33 
  -2   2  -4  159.11    2.72 
  -1   2  -4  127.91    2.22 
   0   2  -4  141.53    2.44 
   1   2  -4   98.80    1.83 
   2   2  -4    0.69    0.16 
   3   2  -4   10.83    0.39 
   4   2  -4   45.39    0.94 
   5   2  -4   22.27    0.87 
   6   2  -4   26.11    1.03 
   7   2  -4    0.26    0.28 
   8   2  -4    0.78    0.36 
   9   2  -4    1.92    0.62 
  -8   3  -4   -0.41    0.39 
  -7   3  -4   -0.08    0.34 
  -6   3  -4   12.43    0.98 
  -5   3  -4    3.00    0.36 
  -4   3  -4   16.63    0.75 
  -3   3  -4    1.02    0.20 
  -2   3  -4    9.86    0.50 
  -1   3  -4   22.01    0.56 
   0   3  -4   32.83    0.63 
   1   3  -4    1.57    0.18 
   2   3  -4    0.61    0.16 
   3   3  -4   21.34    0.57 
   4   3  -4    0.21    0.14 
   5   3  -4   25.29    0.95 
   6   3  -4    8.82    0.67 
   7   3  -4   -0.06    0.26 
   8   3  -4    0.07    0.31 
   9   3  -4    0.30    0.69 
  -8   4  -4    2.06    0.62 
  -7   4  -4   18.97    1.29 
  -6   4  -4    0.73    0.37 
  -5   4  -4    1.97    0.41 
  -4   4  -4   37.29    1.06 
  -3   4  -4    0.94    0.21 
  -2   4  -4   72.00    1.63 
  -1   4  -4    8.40    0.37 
   0   4  -4  100.23    1.62 
   1   4  -4  123.25    1.97 
   2   4  -4   48.80    0.91 
   3   4  -4   34.10    0.76 
   4   4  -4   10.59    0.48 
   5   4  -4    6.25    0.53 
   6   4  -4    6.60    0.59 
   7   4  -4    0.29    0.29 
   8   4  -4    1.67    0.43 
   9   4  -4    0.77    0.50 
  -8   5  -4    1.44    0.59 
  -7   5  -4    0.35    0.41 
  -6   5  -4    3.34    0.56 
  -5   5  -4    2.49    0.45 
  -4   5  -4   32.22    1.46 
  -3   5  -4   43.63    1.15 
  -2   5  -4    5.25    0.31 
  -1   5  -4  165.18    2.86 
   0   5  -4   22.24    0.59 
   1   5  -4   26.89    0.65 
   2   5  -4   29.03    0.70 
   3   5  -4   17.15    0.57 
   4   5  -4   23.35    0.98 
   5   5  -4   54.78    1.58 
   6   5  -4    2.93    0.44 
   7   5  -4    3.13    0.47 
   8   5  -4    0.82    0.39 
  -8   6  -4    0.24    0.37 
  -7   6  -4    1.79    0.52 
  -6   6  -4    1.58    0.44 
  -5   6  -4    0.21    0.30 
  -4   6  -4    2.88    0.37 
  -3   6  -4   12.78    0.52 
  -2   6  -4   38.06    0.86 
  -1   6  -4    7.08    0.35 
   0   6  -4   20.67    0.59 
   1   6  -4  146.48    2.61 
   2   6  -4    0.13    0.12 
   3   6  -4   59.66    1.26 
   4   6  -4   31.41    1.21 
   5   6  -4    5.39    0.53 
   6   6  -4    1.12    0.34 
   7   6  -4    8.95    0.74 
   8   6  -4    0.53    0.36 
  -8   7  -4    2.74    0.53 
  -7   7  -4    3.64    0.53 
  -6   7  -4   24.16    1.17 
  -5   7  -4    4.14    0.46 
  -4   7  -4   14.52    0.76 
  -3   7  -4   63.69    1.61 
  -2   7  -4   12.99    0.51 
  -1   7  -4   66.51    1.35 
   0   7  -4  107.51    1.96 
   1   7  -4   12.56    0.49 
   2   7  -4   48.29    1.06 
   3   7  -4    6.25    0.37 
   4   7  -4    7.47    0.57 
   5   7  -4    8.54    0.65 
   6   7  -4   -0.08    0.25 
   7   7  -4    4.38    0.55 
   8   7  -4    3.64    0.70 
  -8   8  -4    1.93    0.60 
  -7   8  -4    0.98    0.38 
  -6   8  -4    0.04    0.27 
  -5   8  -4    8.65    0.64 
  -4   8  -4   32.84    1.21 
  -3   8  -4   -0.04    0.20 
  -2   8  -4   37.59    1.06 
  -1   8  -4    0.19    0.13 
   0   8  -4    3.00    0.26 
   1   8  -4   35.25    0.86 
   2   8  -4    1.57    0.21 
   3   8  -4    5.52    0.38 
   4   8  -4    0.91    0.30 
   5   8  -4    1.60    0.36 
   6   8  -4    1.90    0.42 
   7   8  -4    0.72    0.37 
   8   8  -4    3.89    0.75 
  -8   9  -4    4.46    0.80 
  -7   9  -4    0.19    0.39 
  -6   9  -4   11.79    0.81 
  -5   9  -4   12.39    0.78 
  -4   9  -4    1.32    0.32 
  -3   9  -4   66.28    1.69 
  -2   9  -4    0.53    0.23 
  -1   9  -4   76.33    1.53 
   0   9  -4   53.24    1.15 
   1   9  -4    0.91    0.19 
   2   9  -4   87.45    1.76 
   3   9  -4    9.23    0.49 
   4   9  -4    2.37    0.39 
   5   9  -4    9.45    0.72 
   6   9  -4    0.30    0.32 
   7   9  -4    2.96    0.52 
   8   9  -4    1.20    0.58 
  -8  10  -4   -0.01    0.47 
  -7  10  -4    1.36    0.53 
  -6  10  -4    1.28    0.40 
  -5  10  -4    2.93    0.42 
  -4  10  -4   14.27    0.79 
  -3  10  -4    3.80    0.42 
  -2  10  -4    0.17    0.21 
  -1  10  -4    1.20    0.25 
   0  10  -4    0.04    0.15 
   1  10  -4    0.44    0.18 
   2  10  -4    0.14    0.17 
   3  10  -4    8.80    0.50 
   4  10  -4    0.25    0.27 
   5  10  -4    3.44    0.49 
   6  10  -4    1.22    0.37 
   7  10  -4    0.04    0.42 
   8  10  -4    0.50    0.52 
  -7  11  -4    0.64    0.47 
  -6  11  -4   13.95    1.13 
  -5  11  -4   10.07    0.71 
  -4  11  -4    6.33    0.55 
  -3  11  -4   83.66    2.05 
  -2  11  -4    1.26    0.28 
  -1  11  -4   39.80    1.17 
   0  11  -4   54.32    1.22 
   1  11  -4    0.64    0.21 
   2  11  -4   69.21    1.48 
   3  11  -4   21.70    0.81 
   4  11  -4   10.74    0.74 
   5  11  -4    7.49    0.68 
   6  11  -4    1.36    0.43 
   7  11  -4    4.21    0.74 
   8  11  -4    0.38    0.55 
  -7  12  -4   -0.26    0.44 
  -6  12  -4   -0.09    0.38 
  -5  12  -4    1.65    0.49 
  -4  12  -4    1.19    0.32 
  -3  12  -4    1.89    0.35 
  -2  12  -4    1.12    0.30 
  -1  12  -4    0.15    0.23 
   0  12  -4    1.06    0.27 
   1  12  -4    0.11    0.19 
   2  12  -4    3.80    0.36 
   3  12  -4    3.51    0.37 
   4  12  -4    0.32    0.28 
   5  12  -4    1.44    0.38 
   6  12  -4    0.41    0.42 
   7  12  -4    0.27    0.50 
  -7  13  -4    0.31    0.48 
  -6  13  -4    8.45    0.94 
  -5  13  -4   12.41    1.06 
  -4  13  -4   35.35    1.74 
  -3  13  -4   22.17    1.03 
  -2  13  -4   -0.08    0.24 
  -1  13  -4   37.37    1.26 
   0  13  -4   45.48    1.32 
   1  13  -4   -0.12    0.19 
   2  13  -4   80.20    1.70 
   3  13  -4    7.96    0.63 
   4  13  -4    9.38    0.72 
   5  13  -4   13.09    1.10 
   6  13  -4   -0.11    0.41 
   7  13  -4    0.54    0.53 
  -7  14  -4    0.45    0.49 
  -6  14  -4    0.35    0.45 
  -5  14  -4    0.53    0.42 
  -4  14  -4    0.78    0.41 
  -3  14  -4    2.19    0.47 
  -2  14  -4   -0.03    0.24 
  -1  14  -4    0.61    0.27 
   0  14  -4    0.36    0.26 
   1  14  -4    9.91    0.64 
   2  14  -4    3.13    0.35 
   3  14  -4    3.35    0.47 
   4  14  -4    1.05    0.47 
   5  14  -4    0.25    0.41 
   6  14  -4    0.31    0.45 
   7  14  -4   -0.03    0.49 
  -6  15  -4    5.11    0.79 
  -5  15  -4    1.11    0.49 
  -4  15  -4    8.20    0.85 
  -3  15  -4   19.89    1.29 
  -2  15  -4    0.99    0.39 
  -1  15  -4   40.48    1.37 
   0  15  -4   22.77    1.03 
   1  15  -4    9.76    0.67 
   2  15  -4   38.15    1.34 
   3  15  -4    7.46    0.82 
   4  15  -4    9.79    0.98 
   5  15  -4   10.78    1.05 
   6  15  -4    1.00    0.53 
  -6  16  -4   -0.24    0.45 
  -5  16  -4    6.05    0.83 
  -4  16  -4    5.94    0.78 
  -3  16  -4    1.19    0.45 
  -2  16  -4    9.33    0.69 
  -1  16  -4    2.38    0.51 
   0  16  -4    2.93    0.43 
   1  16  -4   11.46    0.75 
   2  16  -4    3.55    0.46 
   3  16  -4    6.69    0.81 
   4  16  -4    1.04    0.50 
   5  16  -4   -0.28    0.39 
   6  16  -4    0.64    0.54 
  -5  17  -4    2.03    0.57 
  -4  17  -4    3.33    0.65 
  -3  17  -4   18.91    1.04 
  -2  17  -4    1.83    0.48 
  -1  17  -4   11.04    0.94 
   0  17  -4   16.51    1.13 
   1  17  -4    6.62    0.59 
   2  17  -4    5.04    0.54 
   3  17  -4   -0.09    0.38 
   4  17  -4    2.67    0.66 
   5  17  -4    4.64    0.76 
   6  17  -4    0.42    0.52 
  -5  18  -4    6.87    0.73 
  -4  18  -4    3.73    0.55 
  -3  18  -4    6.62    0.74 
  -2  18  -4   21.82    1.42 
  -1  18  -4    7.07    0.80 
   0  18  -4   10.26    0.94 
   1  18  -4   14.44    1.11 
   2  18  -4   -0.04    0.47 
   3  18  -4    3.85    0.73 
   4  18  -4   12.27    1.14 
   5  18  -4    0.77    0.54 
  -4  19  -4    1.20    0.43 
  -3  19  -4    9.21    1.00 
  -2  19  -4    5.43    0.79 
  -1  19  -4    2.23    0.55 
   0  19  -4    2.86    0.59 
   1  19  -4    0.01    0.37 
   2  19  -4    3.63    0.98 
   3  19  -4    1.71    0.84 
   4  19  -4    4.26    0.76 
  -4  20  -4    0.35    0.52 
  -3  20  -4    1.55    0.56 
  -2  20  -4   20.57    1.41 
  -1  20  -4    2.84    0.63 
   0  20  -4    8.98    0.93 
   1  20  -4   19.08    1.34 
   2  20  -4   -0.39    0.58 
   3  20  -4   13.05    1.72 
   4  20  -4    4.29    1.11 
  -3  21  -4    0.61    0.54 
  -2  21  -4   -0.05    0.44 
  -1  21  -4    1.05    0.55 
   0  21  -4    0.26    0.45 
   1  21  -4    0.75    0.51 
   2  21  -4    0.25    0.71 
   3  21  -4   -0.02    0.70 
  -1  22  -4    6.62    0.93 
   0  22  -4    3.54    0.69 
   1  22  -4    5.95    1.27 
  -2 -22  -3   -0.38    0.58 
  -1 -22  -3    0.94    0.76 
   0 -22  -3    0.20    0.43 
   1 -22  -3    0.42    0.42 
   2 -22  -3   -0.44    0.36 
  -3 -21  -3    6.65    1.27 
  -2 -21  -3    0.73    0.63 
  -1 -21  -3   17.01    1.92 
   0 -21  -3    5.50    0.78 
   1 -21  -3    1.80    0.55 
   2 -21  -3   11.30    1.07 
   3 -21  -3    0.06    0.35 
  -4 -20  -3    0.88    0.54 
  -3 -20  -3    1.25    0.54 
  -2 -20  -3    1.35    0.66 
  -1 -20  -3    0.20    0.37 
   0 -20  -3    0.26    0.36 
   1 -20  -3    2.11    0.56 
   2 -20  -3    2.55    0.45 
   3 -20  -3    4.77    0.63 
   4 -20  -3    1.16    0.43 
  -5 -19  -3   -0.13    0.46 
  -4 -19  -3    4.03    0.72 
  -3 -19  -3   24.08    1.52 
  -2 -19  -3    0.09    0.36 
  -1 -19  -3   22.61    1.40 
   0 -19  -3    8.28    0.86 
   1 -19  -3    1.26    0.45 
   2 -19  -3    7.80    0.70 
   3 -19  -3    5.46    0.64 
   4 -19  -3    6.61    0.69 
   5 -19  -3    4.87    0.82 
  -5 -18  -3    2.56    0.65 
  -4 -18  -3    7.48    0.87 
  -3 -18  -3    0.48    0.41 
  -2 -18  -3    5.04    0.68 
  -1 -18  -3    0.32    0.33 
   0 -18  -3    5.02    0.69 
   1 -18  -3    5.37    0.54 
   2 -18  -3    4.47    0.54 
   3 -18  -3    8.14    0.72 
   4 -18  -3    2.09    0.45 
   5 -18  -3    1.26    0.56 
  -6 -17  -3    4.47    0.76 
  -5 -17  -3    0.42    0.42 
  -4 -17  -3    8.21    0.89 
  -3 -17  -3   16.76    1.22 
  -2 -17  -3    1.00    0.40 
  -1 -17  -3   18.54    0.95 
   0 -17  -3    0.68    0.37 
   1 -17  -3   -0.28    0.22 
   2 -17  -3   10.70    0.77 
   3 -17  -3    8.35    0.71 
   4 -17  -3    1.95    0.40 
   5 -17  -3    1.93    0.45 
   6 -17  -3    0.01    0.44 
  -6 -16  -3   -0.12    0.35 
  -5 -16  -3    3.08    0.63 
  -4 -16  -3   14.83    1.14 
  -3 -16  -3    6.79    0.76 
  -2 -16  -3   40.23    1.88 
  -1 -16  -3    3.03    0.40 
   0 -16  -3   44.87    1.22 
   1 -16  -3    8.05    0.62 
   2 -16  -3    1.24    0.32 
   3 -16  -3   24.53    1.18 
   4 -16  -3    6.96    0.66 
   5 -16  -3    3.70    0.54 
   6 -16  -3    8.79    1.01 
  -7 -15  -3   -0.62    0.41 
  -6 -15  -3    1.61    0.44 
  -5 -15  -3    1.44    0.40 
  -4 -15  -3    0.60    0.31 
  -3 -15  -3    0.31    0.35 
  -2 -15  -3   10.09    0.86 
  -1 -15  -3    8.61    0.60 
   0 -15  -3    5.34    0.41 
   1 -15  -3    2.07    0.36 
   2 -15  -3   29.51    1.24 
   3 -15  -3    0.73    0.30 
   4 -15  -3    1.27    0.36 
   5 -15  -3    0.31    0.31 
   6 -15  -3    0.30    0.43 
   7 -15  -3    0.16    0.46 
  -7 -14  -3    9.37    1.05 
  -6 -14  -3    0.71    0.36 
  -5 -14  -3   26.40    1.27 
  -4 -14  -3   15.42    0.89 
  -3 -14  -3    3.26    0.40 
  -2 -14  -3  118.23    2.70 
  -1 -14  -3    9.01    0.61 
   0 -14  -3   14.81    0.66 
   1 -14  -3   64.24    1.42 
   2 -14  -3    0.10    0.24 
   3 -14  -3   37.38    1.43 
   4 -14  -3    8.01    0.66 
   5 -14  -3    8.38    0.72 
   6 -14  -3    2.18    0.56 
   7 -14  -3    0.83    0.51 
  -7 -13  -3    0.13    0.45 
  -6 -13  -3    0.23    0.31 
  -5 -13  -3    0.02    0.26 
  -4 -13  -3    2.55    0.39 
  -3 -13  -3    5.27    0.49 
  -2 -13  -3    8.97    0.50 
  -1 -13  -3   10.51    0.62 
   0 -13  -3    3.27    0.33 
   1 -13  -3    2.82    0.31 
   2 -13  -3    2.90    0.35 
   3 -13  -3    0.25    0.26 
   4 -13  -3    0.30    0.27 
   5 -13  -3    0.50    0.29 
   6 -13  -3    0.27    0.31 
   7 -13  -3   -0.25    0.41 
  -7 -12  -3    4.57    0.75 
  -6 -12  -3    0.86    0.34 
  -5 -12  -3   49.31    1.66 
  -4 -12  -3   16.23    0.87 
  -3 -12  -3    8.15    0.57 
  -2 -12  -3   85.82    1.72 
  -1 -12  -3   11.92    0.65 
   0 -12  -3   39.56    0.96 
   1 -12  -3   64.78    1.41 
   2 -12  -3    0.26    0.18 
   3 -12  -3   56.74    1.54 
   4 -12  -3   14.53    0.84 
   5 -12  -3   12.66    0.82 
   6 -12  -3    2.37    0.43 
   7 -12  -3    0.32    0.43 
   8 -12  -3    1.39    0.57 
  -8 -11  -3    0.43    0.50 
  -7 -11  -3    1.43    0.54 
  -6 -11  -3    0.48    0.31 
  -5 -11  -3   -0.14    0.23 
  -4 -11  -3    3.73    0.45 
  -3 -11  -3    7.65    0.54 
  -2 -11  -3    0.69    0.19 
  -1 -11  -3    5.50    0.34 
   0 -11  -3   -0.06    0.14 
   1 -11  -3   -0.14    0.15 
   2 -11  -3    5.10    0.37 
   3 -11  -3    1.31    0.24 
   4 -11  -3    8.80    0.64 
   5 -11  -3    0.48    0.28 
   6 -11  -3    0.05    0.27 
   7 -11  -3    0.72    0.47 
   8 -11  -3    1.23    0.54 
  -8 -10  -3    1.47    0.58 
  -7 -10  -3    5.04    0.76 
  -6 -10  -3   -0.31    0.25 
  -5 -10  -3    0.57    0.27 
  -4 -10  -3    5.11    0.49 
  -3 -10  -3   67.50    1.65 
  -2 -10  -3   67.01    1.35 
  -1 -10  -3    5.31    0.32 
   0 -10  -3  118.58    2.16 
   1 -10  -3   74.85    1.52 
   2 -10  -3    0.26    0.17 
   3 -10  -3   72.97    1.51 
   4 -10  -3   12.14    0.73 
   5 -10  -3    1.44    0.34 
   6 -10  -3   27.19    1.26 
   7 -10  -3    0.09    0.38 
   8 -10  -3   -0.01    0.46 
  -8  -9  -3    3.98    0.76 
  -7  -9  -3    0.46    0.43 
  -6  -9  -3    1.59    0.46 
  -5  -9  -3    5.85    0.54 
  -4  -9  -3    0.34    0.24 
  -3  -9  -3   11.52    0.63 
  -2  -9  -3    4.31    0.30 
  -1  -9  -3    8.10    0.39 
   0  -9  -3    2.52    0.21 
   1  -9  -3    0.91    0.18 
   2  -9  -3   29.95    0.82 
   3  -9  -3    8.38    0.45 
   4  -9  -3    4.15    0.36 
   5  -9  -3    0.59    0.28 
   6  -9  -3    1.15    0.33 
   7  -9  -3    0.17    0.38 
   8  -9  -3    0.21    0.40 
  -8  -8  -3    5.33    0.83 
  -7  -8  -3    6.10    0.78 
  -6  -8  -3    0.36    0.33 
  -5  -8  -3   23.46    1.03 
  -4  -8  -3   10.19    0.61 
  -3  -8  -3   13.39    0.67 
  -2  -8  -3   39.08    0.87 
  -1  -8  -3   12.14    0.47 
   0  -8  -3  110.37    2.00 
   1  -8  -3  104.32    1.68 
   2  -8  -3    2.19    0.23 
   3  -8  -3    7.17    0.41 
   4  -8  -3   10.82    0.55 
   5  -8  -3    1.74    0.28 
   6  -8  -3    8.29    0.66 
   7  -8  -3    0.59    0.32 
   8  -8  -3    4.88    0.72 
  -8  -7  -3    1.21    0.53 
  -7  -7  -3    0.41    0.37 
  -6  -7  -3    3.45    0.57 
  -5  -7  -3    0.15    0.24 
  -4  -7  -3   21.31    0.90 
  -3  -7  -3   44.90    1.21 
  -2  -7  -3    3.11    0.23 
  -1  -7  -3   54.14    1.09 
   0  -7  -3   37.95    0.80 
   1  -7  -3   52.45    0.95 
   2  -7  -3   26.77    0.59 
   3  -7  -3   12.91    0.43 
   4  -7  -3   23.57    0.82 
   5  -7  -3    2.08    0.30 
   6  -7  -3   -0.08    0.22 
   7  -7  -3    0.78    0.33 
   8  -7  -3   -0.34    0.34 
  -9  -6  -3   -0.18    0.65 
  -8  -6  -3    2.97    0.64 
  -7  -6  -3    4.19    0.66 
  -6  -6  -3    2.61    0.49 
  -5  -6  -3   61.02    1.60 
  -4  -6  -3   43.20    1.21 
  -3  -6  -3    6.49    0.43 
  -2  -6  -3  118.88    2.08 
  -1  -6  -3   52.36    1.05 
   0  -6  -3   28.51    0.64 
   1  -6  -3  115.55    1.82 
   2  -6  -3    2.12    0.17 
   3  -6  -3   31.37    0.72 
   4  -6  -3   13.50    0.51 
   5  -6  -3    2.33    0.28 
   6  -6  -3   13.13    0.60 
   7  -6  -3   -0.13    0.20 
   8  -6  -3    1.73    0.40 
  -9  -5  -3    0.58    0.43 
  -8  -5  -3    2.11    0.58 
  -7  -5  -3    3.44    0.59 
  -6  -5  -3    2.66    0.51 
  -5  -5  -3    0.32    0.23 
  -4  -5  -3   43.21    1.18 
  -3  -5  -3   54.55    1.33 
  -2  -5  -3   22.50    0.56 
  -1  -5  -3  314.26    5.12 
   0  -5  -3   83.58    1.50 
   1  -5  -3   19.12    0.52 
   2  -5  -3   84.32    1.38 
   3  -5  -3   21.81    0.60 
   4  -5  -3   11.10    0.46 
   5  -5  -3   15.37    0.52 
   6  -5  -3    3.90    0.28 
   7  -5  -3   11.88    0.67 
   8  -5  -3   -0.09    0.28 
  -9  -4  -3   -0.44    0.35 
  -8  -4  -3    0.08    0.38 
  -7  -4  -3    2.53    0.54 
  -6  -4  -3    1.12    0.39 
  -5  -4  -3   44.85    1.59 
  -4  -4  -3    0.76    0.20 
  -3  -4  -3   18.78    0.65 
  -2  -4  -3  123.29    2.14 
  -1  -4  -3   21.06    0.51 
   0  -4  -3   29.43    0.65 
   1  -4  -3   49.84    1.00 
   2  -4  -3   27.24    0.58 
   3  -4  -3   57.59    0.95 
   4  -4  -3   53.35    0.95 
   5  -4  -3   10.72    0.41 
   6  -4  -3   11.82    0.43 
   7  -4  -3    4.70    0.33 
   8  -4  -3   -0.16    0.56 
  -9  -3  -3    4.06    0.76 
  -8  -3  -3    0.19    0.34 
  -7  -3  -3    1.67    0.46 
  -6  -3  -3   49.38    1.79 
  -5  -3  -3   14.53    0.93 
  -4  -3  -3   43.32    1.13 
  -3  -3  -3  142.58    2.90 
  -2  -3  -3    0.14    0.12 
  -1  -3  -3  168.03    2.82 
   0  -3  -3   67.80    1.09 
   1  -3  -3   28.56    0.63 
   2  -3  -3   46.18    0.80 
   3  -3  -3    7.33    0.29 
   4  -3  -3   10.33    0.39 
   5  -3  -3   16.45    0.47 
   6  -3  -3   15.81    0.50 
   7  -3  -3   25.13    0.68 
  -9  -2  -3   -0.05    0.46 
  -8  -2  -3    0.62    0.35 
  -7  -2  -3   11.66    0.80 
  -6  -2  -3    1.04    0.37 
  -5  -2  -3   14.45    0.91 
  -4  -2  -3    7.23    0.43 
  -3  -2  -3    1.38    0.19 
  -2  -2  -3    6.22    0.34 
  -1  -2  -3   32.75    0.60 
   0  -2  -3   46.74    0.88 
   1  -2  -3   11.24    0.41 
   2  -2  -3    0.15    0.08 
   3  -2  -3   29.13    0.64 
   4  -2  -3   22.41    0.53 
   5  -2  -3    7.92    0.32 
   6  -2  -3    6.95    0.33 
   7  -2  -3    0.06    0.15 
   8  -2  -3    0.20    0.27 
  -9  -1  -3    1.08    0.60 
  -8  -1  -3    7.67    0.91 
  -7  -1  -3    1.26    0.35 
  -6  -1  -3   55.52    1.59 
  -5  -1  -3    4.82    0.44 
  -4  -1  -3   77.29    1.53 
  -3  -1  -3   53.50    1.06 
  -2  -1  -3    6.96    0.29 
  -1  -1  -3  112.47    1.94 
   0  -1  -3  204.20    3.02 
   1  -1  -3   78.66    1.27 
   2  -1  -3  368.20    5.31 
   3  -1  -3   37.24    0.68 
   4  -1  -3   75.93    1.24 
   5  -1  -3   82.13    1.18 
   6  -1  -3   14.64    0.47 
   7  -1  -3    4.53    0.38 
   8  -1  -3    2.91    0.45 
   9  -1  -3   -0.13    0.60 
  -9   0  -3   -0.12    0.48 
  -8   0  -3    0.22    0.39 
  -7   0  -3   -0.34    0.25 
  -6   0  -3   -0.33    0.21 
  -5   0  -3    0.16    0.21 
  -4   0  -3   -0.05    0.15 
  -3   0  -3    0.01    0.09 
  -2   0  -3    0.09    0.08 
  -1   0  -3   -0.02    0.07 
   0   0  -3    0.02    0.08 
   1   0  -3    0.05    0.08 
   2   0  -3    0.11    0.09 
   3   0  -3    0.06    0.09 
   4   0  -3   -0.15    0.10 
   5   0  -3    0.07    0.13 
   6   0  -3    0.14    0.16 
   7   0  -3   -0.02    0.20 
   8   0  -3    0.05    0.27 
   9   0  -3   -0.54    0.42 
  -9   1  -3    1.25    0.57 
  -8   1  -3    8.43    0.93 
  -7   1  -3    1.40    0.45 
  -6   1  -3   55.72    1.56 
  -5   1  -3    4.03    0.40 
  -4   1  -3   79.73    1.82 
  -3   1  -3   52.75    1.15 
  -2   1  -3    6.63    0.25 
  -1   1  -3  112.91    1.94 
   0   1  -3  205.58    3.38 
   1   1  -3   81.35    1.66 
   2   1  -3  362.62    5.29 
   3   1  -3   37.08    0.74 
   4   1  -3   76.47    1.37 
   5   1  -3   81.38    1.36 
   6   1  -3   12.73    0.57 
   7   1  -3    5.43    0.54 
   8   1  -3    1.64    0.42 
   9   1  -3    0.21    0.42 
  -9   2  -3   -0.55    0.40 
  -8   2  -3    0.35    0.46 
  -7   2  -3   13.38    1.07 
  -6   2  -3    0.26    0.25 
  -5   2  -3   11.09    0.65 
  -4   2  -3    8.54    0.50 
  -3   2  -3    0.99    0.19 
  -2   2  -3    7.17    0.37 
  -1   2  -3   32.51    0.68 
   0   2  -3   46.91    0.80 
   1   2  -3   13.97    0.45 
   2   2  -3    0.18    0.08 
   3   2  -3   30.84    0.65 
   4   2  -3   17.77    0.60 
   5   2  -3    6.82    0.34 
   6   2  -3    7.45    0.49 
   7   2  -3    0.08    0.27 
   8   2  -3    0.61    0.34 
   9   2  -3    2.52    0.62 
  -9   3  -3    5.63    0.84 
  -8   3  -3   -0.55    0.38 
  -7   3  -3    2.04    0.50 
  -6   3  -3   47.12    1.86 
  -5   3  -3   13.48    0.69 
  -4   3  -3   43.88    1.15 
  -3   3  -3  142.66    2.91 
  -2   3  -3    0.22    0.12 
  -1   3  -3  165.61    3.26 
   0   3  -3   67.73    1.10 
   1   3  -3   27.87    0.66 
   2   3  -3   43.10    0.82 
   3   3  -3    5.97    0.30 
   4   3  -3    9.63    0.43 
   5   3  -3   15.38    0.66 
   6   3  -3   17.42    0.75 
   7   3  -3   24.28    1.17 
   8   3  -3    0.94    0.37 
   9   3  -3    2.70    0.63 
  -9   4  -3    0.03    0.48 
  -8   4  -3   -0.12    0.36 
  -7   4  -3    1.24    0.45 
  -6   4  -3    1.61    0.42 
  -5   4  -3   40.98    2.15 
  -4   4  -3    0.63    0.19 
  -3   4  -3   16.54    0.60 
  -2   4  -3  121.68    2.49 
  -1   4  -3   21.29    0.52 
   0   4  -3   29.06    0.64 
   1   4  -3   51.17    0.99 
   2   4  -3   24.74    0.61 
   3   4  -3   58.76    1.19 
   4   4  -3   56.04    1.21 
   5   4  -3    9.50    0.53 
   6   4  -3   10.83    0.60 
   7   4  -3    5.61    0.59 
   8   4  -3    0.44    0.40 
   9   4  -3    0.26    0.45 
  -9   5  -3    0.87    0.54 
  -8   5  -3    1.78    0.53 
  -7   5  -3    4.23    0.65 
  -6   5  -3    3.07    0.51 
  -5   5  -3    0.18    0.28 
  -4   5  -3   44.79    1.14 
  -3   5  -3   54.68    1.28 
  -2   5  -3   22.33    0.57 
  -1   5  -3  311.78    5.12 
   0   5  -3   81.70    1.50 
   1   5  -3   16.82    0.49 
   2   5  -3   80.15    1.53 
   3   5  -3   23.03    0.68 
   4   5  -3   10.96    0.53 
   5   5  -3   14.71    0.66 
   6   5  -3    4.11    0.39 
   7   5  -3   11.66    0.83 
   8   5  -3    0.26    0.40 
   9   5  -3    0.99    0.53 
  -9   6  -3    0.55    0.79 
  -8   6  -3    2.83    0.51 
  -7   6  -3    5.63    0.73 
  -6   6  -3    1.83    0.43 
  -5   6  -3   58.89    1.97 
  -4   6  -3   45.24    1.26 
  -3   6  -3    6.36    0.33 
  -2   6  -3  114.46    2.08 
  -1   6  -3   53.45    1.06 
   0   6  -3   28.39    0.65 
   1   6  -3  116.30    2.05 
   2   6  -3    2.18    0.21 
   3   6  -3   30.81    0.80 
   4   6  -3   15.48    0.64 
   5   6  -3    2.89    0.33 
   6   6  -3   14.67    0.73 
   7   6  -3    0.18    0.31 
   8   6  -3    1.63    0.54 
   9   6  -3    0.54    0.52 
  -8   7  -3    0.53    0.44 
  -7   7  -3    0.60    0.34 
  -6   7  -3    4.78    0.51 
  -5   7  -3   -0.05    0.23 
  -4   7  -3   24.71    0.96 
  -3   7  -3   47.79    1.24 
  -2   7  -3    3.75    0.24 
  -1   7  -3   53.97    1.09 
   0   7  -3   36.54    0.81 
   1   7  -3   52.44    1.08 
   2   7  -3   24.64    0.72 
   3   7  -3   11.28    0.51 
   4   7  -3   22.60    0.81 
   5   7  -3    1.38    0.26 
   6   7  -3    0.09    0.27 
   7   7  -3    0.74    0.42 
   8   7  -3   -0.19    0.39 
  -8   8  -3    7.70    0.93 
  -7   8  -3    5.09    0.60 
  -6   8  -3    0.09    0.25 
  -5   8  -3   22.88    1.03 
  -4   8  -3    9.50    0.60 
  -3   8  -3   12.38    0.65 
  -2   8  -3   38.73    0.85 
  -1   8  -3   12.18    0.45 
   0   8  -3  112.56    2.03 
   1   8  -3  104.72    1.68 
   2   8  -3    2.19    0.23 
   3   8  -3    8.01    0.44 
   4   8  -3   11.14    0.56 
   5   8  -3    1.48    0.27 
   6   8  -3    7.79    0.68 
   7   8  -3    0.20    0.39 
   8   8  -3    4.84    0.77 
  -8   9  -3    3.30    0.72 
  -7   9  -3    0.93    0.46 
  -6   9  -3    1.37    0.35 
  -5   9  -3    4.86    0.48 
  -4   9  -3   -0.06    0.21 
  -3   9  -3   13.95    0.69 
  -2   9  -3    4.32    0.37 
  -1   9  -3    8.67    0.39 
   0   9  -3    2.95    0.25 
   1   9  -3    0.73    0.13 
   2   9  -3   28.22    0.84 
   3   9  -3    6.64    0.42 
   4   9  -3    4.38    0.38 
   5   9  -3    0.59    0.24 
   6   9  -3    1.23    0.36 
   7   9  -3   -0.03    0.39 
   8   9  -3   -0.04    0.46 
  -8  10  -3    1.37    0.57 
  -7  10  -3    5.14    0.74 
  -6  10  -3    0.17    0.33 
  -5  10  -3    1.03    0.30 
  -4  10  -3    3.91    0.43 
  -3  10  -3   63.88    1.64 
  -2  10  -3   63.19    1.59 
  -1  10  -3    4.05    0.37 
   0  10  -3  118.77    2.20 
   1  10  -3   75.38    1.32 
   2  10  -3   -0.06    0.15 
   3  10  -3   70.01    1.52 
   4  10  -3   12.17    0.62 
   5  10  -3    2.10    0.32 
   6  10  -3   25.38    1.54 
   7  10  -3    0.03    0.40 
   8  10  -3    0.87    0.56 
  -8  11  -3    0.91    0.53 
  -7  11  -3    1.58    0.54 
  -6  11  -3    0.34    0.37 
  -5  11  -3    0.32    0.33 
  -4  11  -3    2.56    0.37 
  -3  11  -3    7.34    0.53 
  -2  11  -3    0.75    0.26 
  -1  11  -3    6.74    0.48 
   0  11  -3    0.05    0.12 
   1  11  -3    0.25    0.16 
   2  11  -3    4.38    0.36 
   3  11  -3    0.76    0.24 
   4  11  -3   10.16    0.57 
   5  11  -3    1.02    0.31 
   6  11  -3   -0.03    0.38 
   7  11  -3    0.82    0.49 
   8  11  -3    2.09    0.65 
  -7  12  -3    5.45    0.79 
  -6  12  -3    0.87    0.45 
  -5  12  -3   46.51    2.12 
  -4  12  -3   16.07    1.09 
  -3  12  -3    8.40    0.58 
  -2  12  -3   87.42    2.04 
  -1  12  -3   13.44    0.68 
   0  12  -3   37.65    0.96 
   1  12  -3   67.91    1.42 
   2  12  -3    0.06    0.18 
   3  12  -3   54.30    1.30 
   4  12  -3   13.28    0.76 
   5  12  -3   12.46    0.79 
   6  12  -3    1.46    0.55 
   7  12  -3   -0.11    0.42 
   8  12  -3    0.80    0.57 
  -7  13  -3    0.19    0.44 
  -6  13  -3    0.49    0.45 
  -5  13  -3   -0.14    0.32 
  -4  13  -3    2.28    0.46 
  -3  13  -3    4.89    0.61 
  -2  13  -3    8.27    0.58 
  -1  13  -3    9.83    0.52 
   0  13  -3    3.88    0.32 
   1  13  -3    2.78    0.36 
   2  13  -3    2.72    0.37 
   3  13  -3    0.75    0.29 
   4  13  -3    0.04    0.24 
   5  13  -3    0.73    0.43 
   6  13  -3    0.04    0.42 
   7  13  -3    0.13    0.44 
  -7  14  -3   11.16    1.12 
  -6  14  -3    0.72    0.45 
  -5  14  -3   28.09    1.61 
  -4  14  -3   14.38    1.07 
  -3  14  -3    4.32    0.58 
  -2  14  -3  120.47    3.39 
  -1  14  -3    8.06    0.48 
   0  14  -3   13.27    0.73 
   1  14  -3   61.44    1.64 
   2  14  -3   -0.07    0.23 
   3  14  -3   37.52    1.40 
   4  14  -3    8.09    0.63 
   5  14  -3    9.76    0.96 
   6  14  -3    2.86    0.63 
   7  14  -3    0.93    0.57 
  -7  15  -3    0.44    0.51 
  -6  15  -3    1.17    0.52 
  -5  15  -3    0.96    0.47 
  -4  15  -3    0.13    0.37 
  -3  15  -3    0.35    0.34 
  -2  15  -3    9.53    0.67 
  -1  15  -3    9.69    0.64 
   0  15  -3    6.26    0.52 
   1  15  -3    1.44    0.32 
   2  15  -3   32.30    1.26 
   3  15  -3    1.12    0.33 
   4  15  -3    2.24    0.40 
   5  15  -3    0.19    0.41 
   6  15  -3    0.19    0.46 
   7  15  -3    0.21    0.55 
  -6  16  -3   -0.31    0.41 
  -5  16  -3    4.27    0.71 
  -4  16  -3   13.95    1.12 
  -3  16  -3    6.21    0.60 
  -2  16  -3   42.81    1.53 
  -1  16  -3    3.20    0.53 
   0  16  -3   45.98    1.96 
   1  16  -3    8.10    0.61 
   2  16  -3    1.55    0.35 
   3  16  -3   25.66    1.17 
   4  16  -3    5.70    0.58 
   5  16  -3    3.99    0.71 
   6  16  -3    8.71    1.01 
  -6  17  -3    4.36    0.61 
  -5  17  -3    0.17    0.35 
  -4  17  -3    7.47    0.69 
  -3  17  -3   17.75    0.98 
  -2  17  -3    2.47    0.41 
  -1  17  -3   17.19    1.19 
   0  17  -3    2.04    0.51 
   1  17  -3   -0.11    0.31 
   2  17  -3    9.64    0.71 
   3  17  -3    9.78    0.73 
   4  17  -3    2.76    0.47 
   5  17  -3    1.29    0.56 
   6  17  -3   -0.01    0.49 
  -5  18  -3    4.05    0.58 
  -4  18  -3    7.90    0.73 
  -3  18  -3    0.14    0.30 
  -2  18  -3    6.35    0.78 
  -1  18  -3    0.19    0.38 
   0  18  -3    6.93    0.80 
   1  18  -3    3.51    0.61 
   2  18  -3    3.51    0.61 
   3  18  -3    7.85    0.69 
   4  18  -3    2.11    0.58 
   5  18  -3    0.68    0.48 
  -5  19  -3    0.07    0.37 
  -4  19  -3    5.01    0.62 
  -3  19  -3   26.56    1.29 
  -2  19  -3   -0.05    0.39 
  -1  19  -3   22.29    1.44 
   0  19  -3   11.68    1.03 
   1  19  -3    2.08    0.53 
   2  19  -3    8.12    0.85 
   3  19  -3    4.76    0.72 
   4  19  -3    6.39    1.20 
   5  19  -3    5.67    0.86 
  -4  20  -3    0.64    0.40 
  -3  20  -3    0.66    0.46 
  -2  20  -3    1.00    0.47 
  -1  20  -3    0.13    0.40 
   0  20  -3    0.90    0.46 
   1  20  -3    1.89    0.53 
   2  20  -3    3.48    0.63 
   3  20  -3    3.18    0.66 
   4  20  -3   -0.20    0.58 
  -3  21  -3    5.67    0.85 
  -2  21  -3   -0.13    0.41 
  -1  21  -3   15.29    1.20 
   0  21  -3    6.53    0.85 
   1  21  -3    3.80    0.69 
   2  21  -3   14.02    1.20 
   3  21  -3    0.42    0.52 
  -2  22  -3    0.29    0.47 
  -1  22  -3   -0.48    0.40 
   0  22  -3    0.47    0.48 
   1  22  -3    1.74    0.59 
   2  22  -3   -0.36    0.41 
   0  23  -3    3.53    1.00 
  -1 -23  -2    0.16    0.65 
   0 -23  -2    0.05    0.42 
   1 -23  -2    0.11    0.46 
  -3 -22  -2    3.45    1.09 
  -2 -22  -2   16.56    1.93 
  -1 -22  -2   -0.11    0.36 
   0 -22  -2   13.04    1.16 
   1 -22  -2    5.94    0.79 
   2 -22  -2    0.08    0.42 
   3 -22  -2    8.78    0.82 
  -4 -21  -2    0.91    0.55 
  -3 -21  -2   -0.23    0.54 
  -2 -21  -2   -0.36    0.55 
  -1 -21  -2    2.68    0.61 
   0 -21  -2    0.31    0.38 
   1 -21  -2    1.39    0.50 
   2 -21  -2    0.78    0.40 
   3 -21  -2   -0.03    0.31 
   4 -21  -2    4.01    0.76 
  -4 -20  -2    3.10    0.65 
  -3 -20  -2    5.21    0.76 
  -2 -20  -2   11.89    1.59 
  -1 -20  -2    0.16    0.36 
   0 -20  -2   12.21    1.05 
   1 -20  -2   10.01    0.96 
   2 -20  -2    3.30    0.48 
   3 -20  -2    9.25    0.78 
   4 -20  -2    1.83    0.57 
   5 -20  -2    0.23    0.46 
  -5 -19  -2    0.52    0.51 
  -4 -19  -2    1.97    0.57 
  -3 -19  -2   10.02    0.99 
  -2 -19  -2    0.20    0.57 
  -1 -19  -2    2.70    0.55 
   0 -19  -2    3.29    0.56 
   1 -19  -2   10.43    0.95 
   2 -19  -2    3.40    0.48 
   3 -19  -2   -0.17    0.27 
   4 -19  -2    1.78    0.43 
   5 -19  -2    0.34    0.46 
  -6 -18  -2   -0.16    0.45 
  -5 -18  -2    8.92    1.00 
  -4 -18  -2    3.63    0.68 
  -3 -18  -2   -0.20    0.35 
  -2 -18  -2   13.62    0.90 
  -1 -18  -2    1.77    0.46 
   0 -18  -2    8.22    0.82 
   1 -18  -2    2.94    0.45 
   2 -18  -2    0.23    0.26 
   3 -18  -2   13.00    0.87 
   4 -18  -2    3.33    0.50 
   5 -18  -2    0.76    0.49 
   6 -18  -2    0.95    0.54 
  -6 -17  -2    1.88    0.47 
  -5 -17  -2    0.95    0.50 
  -4 -17  -2    8.44    0.85 
  -3 -17  -2   12.94    1.03 
  -2 -17  -2    1.47    0.33 
  -1 -17  -2   34.29    1.32 
   0 -17  -2    0.25    0.31 
   1 -17  -2    5.16    0.51 
   2 -17  -2   16.24    0.92 
   3 -17  -2   -0.07    0.25 
   4 -17  -2    9.34    0.74 
   5 -17  -2    6.82    0.87 
   6 -17  -2    0.32    0.46 
  -6 -16  -2    3.05    0.52 
  -5 -16  -2    4.41    0.56 
  -4 -16  -2   -0.01    0.38 
  -3 -16  -2    8.03    0.83 
  -2 -16  -2   14.65    0.82 
  -1 -16  -2    0.68    0.27 
   0 -16  -2   13.33    0.77 
   1 -16  -2   20.68    1.00 
   2 -16  -2    2.11    0.36 
   3 -16  -2    5.88    0.57 
   4 -16  -2    1.43    0.37 
   5 -16  -2    1.64    0.52 
   6 -16  -2    2.19    0.59 
   7 -16  -2    0.45    0.51 
  -7 -15  -2    0.81    0.42 
  -6 -15  -2    4.13    0.57 
  -5 -15  -2    1.44    0.39 
  -4 -15  -2    4.31    0.49 
  -3 -15  -2   11.08    0.91 
  -2 -15  -2    9.60    0.63 
  -1 -15  -2   39.01    1.24 
   0 -15  -2    5.66    0.43 
   1 -15  -2   11.78    0.72 
   2 -15  -2   31.55    1.26 
   3 -15  -2    0.18    0.24 
   4 -15  -2   12.68    0.82 
   5 -15  -2   17.32    0.99 
   6 -15  -2   -0.45    0.36 
   7 -15  -2    1.73    0.58 
  -7 -14  -2    0.42    0.37 
  -6 -14  -2    3.88    0.55 
  -5 -14  -2    0.62    0.31 
  -4 -14  -2   12.30    0.78 
  -3 -14  -2   32.72    1.23 
  -2 -14  -2   18.17    0.85 
  -1 -14  -2    7.25    0.53 
   0 -14  -2   43.93    1.08 
   1 -14  -2   21.55    0.88 
   2 -14  -2    2.18    0.34 
   3 -14  -2    2.96    0.41 
   4 -14  -2    0.00    0.24 
   5 -14  -2    2.43    0.41 
   6 -14  -2    0.82    0.45 
   7 -14  -2    1.34    0.54 
  -7 -13  -2    3.51    0.56 
  -6 -13  -2   29.07    1.37 
  -5 -13  -2   -0.13    0.26 
  -4 -13  -2   11.70    0.75 
  -3 -13  -2   37.81    1.28 
  -2 -13  -2    3.39    0.32 
  -1 -13  -2   26.29    0.85 
   0 -13  -2   20.67    0.74 
   1 -13  -2   53.74    1.20 
   2 -13  -2   35.91    1.28 
   3 -13  -2    1.89    0.35 
   4 -13  -2   24.66    1.10 
   5 -13  -2    0.94    0.32 
   6 -13  -2    0.16    0.34 
   7 -13  -2    6.70    0.84 
  -8 -12  -2   -0.02    0.46 
  -7 -12  -2    1.45    0.54 
  -6 -12  -2   -0.03    0.29 
  -5 -12  -2    5.70    0.56 
  -4 -12  -2   -0.15    0.22 
  -3 -12  -2    0.13    0.23 
  -2 -12  -2    2.59    0.27 
  -1 -12  -2    0.28    0.13 
   0 -12  -2    2.70    0.27 
   1 -12  -2    0.10    0.16 
   2 -12  -2    1.72    0.24 
   3 -12  -2    3.11    0.40 
   4 -12  -2    1.55    0.33 
   5 -12  -2    0.12    0.25 
   6 -12  -2    0.51    0.38 
   7 -12  -2    1.15    0.50 
   8 -12  -2   -0.16    0.41 
  -8 -11  -2    0.77    0.53 
  -7 -11  -2    4.59    0.74 
  -6 -11  -2   18.81    1.04 
  -5 -11  -2    1.69    0.36 
  -4 -11  -2   81.70    2.04 
  -3 -11  -2   32.63    0.98 
  -2 -11  -2   13.76    0.56 
  -1 -11  -2  209.48    3.17 
   0 -11  -2   32.52    0.69 
   1 -11  -2   56.85    1.20 
   2 -11  -2  115.18    2.15 
   3 -11  -2    2.34    0.33 
   4 -11  -2   28.41    1.14 
   5 -11  -2   26.88    1.15 
   6 -11  -2    8.79    0.69 
   7 -11  -2    3.48    0.53 
   8 -11  -2    0.68    0.38 
  -8 -10  -2    0.42    0.46 
  -7 -10  -2    0.37    0.43 
  -6 -10  -2    0.08    0.25 
  -5 -10  -2    1.42    0.33 
  -4 -10  -2    3.13    0.40 
  -3 -10  -2    3.67    0.30 
  -2 -10  -2   34.21    0.82 
  -1 -10  -2    5.85    0.28 
   0 -10  -2   10.25    0.34 
   1 -10  -2   24.50    0.71 
   2 -10  -2   -0.06    0.14 
   3 -10  -2    0.20    0.17 
   4 -10  -2    0.58    0.25 
   5 -10  -2    6.61    0.48 
   6 -10  -2    0.15    0.23 
   7 -10  -2   -0.03    0.30 
   8 -10  -2    0.12    0.36 
  -8  -9  -2    0.96    0.51 
  -7  -9  -2    1.55    0.48 
  -6  -9  -2   12.25    0.82 
  -5  -9  -2    1.07    0.32 
  -4  -9  -2  111.12    2.51 
  -3  -9  -2   28.01    0.80 
  -2  -9  -2   78.24    1.51 
  -1  -9  -2  507.36    8.28 
   0  -9  -2   80.89    1.35 
   1  -9  -2   50.99    1.05 
   2  -9  -2   87.59    1.68 
   3  -9  -2    0.72    0.18 
   4  -9  -2   60.12    1.54 
   5  -9  -2   30.73    1.04 
   6  -9  -2   12.82    0.69 
   7  -9  -2   14.25    0.89 
   8  -9  -2    1.84    0.45 
  -8  -8  -2    0.02    0.41 
  -7  -8  -2    2.01    0.53 
  -6  -8  -2    1.92    0.37 
  -5  -8  -2   34.17    1.29 
  -4  -8  -2    7.89    0.55 
  -3  -8  -2    2.39    0.22 
  -2  -8  -2   40.93    0.89 
  -1  -8  -2   34.01    0.76 
   0  -8  -2   28.42    0.56 
   1  -8  -2    2.70    0.22 
   2  -8  -2    0.25    0.13 
   3  -8  -2    1.75    0.21 
   4  -8  -2    3.05    0.26 
   5  -8  -2    4.90    0.41 
   6  -8  -2    0.30    0.23 
   7  -8  -2   13.30    0.86 
   8  -8  -2    0.72    0.46 
   9  -8  -2    0.67    0.48 
  -9  -7  -2    5.04    0.85 
  -8  -7  -2    2.55    0.62 
  -7  -7  -2    2.02    0.51 
  -6  -7  -2   21.88    1.03 
  -5  -7  -2    1.48    0.32 
  -4  -7  -2   56.19    1.44 
  -3  -7  -2   91.42    1.70 
  -2  -7  -2    0.55    0.13 
  -1  -7  -2  103.12    1.83 
   0  -7  -2   12.08    0.35 
   1  -7  -2   67.83    1.31 
   2  -7  -2   55.66    1.14 
   3  -7  -2    0.62    0.15 
   4  -7  -2   32.63    0.79 
   5  -7  -2    2.30    0.26 
   6  -7  -2    7.76    0.52 
   7  -7  -2   15.82    0.90 
   8  -7  -2    0.49    0.40 
   9  -7  -2    3.08    0.94 
  -9  -6  -2   -0.39    0.44 
  -8  -6  -2    1.07    0.49 
  -7  -6  -2    5.57    0.74 
  -6  -6  -2    0.63    0.27 
  -5  -6  -2   31.74    1.14 
  -4  -6  -2    4.17    0.38 
  -3  -6  -2   11.79    0.40 
  -2  -6  -2   88.73    1.61 
  -1  -6  -2    0.13    0.09 
   0  -6  -2  318.07    4.60 
   1  -6  -2   26.45    0.61 
   2  -6  -2   14.53    0.39 
   3  -6  -2   62.33    1.08 
   4  -6  -2   36.52    0.71 
   5  -6  -2   14.50    0.51 
   6  -6  -2   20.23    0.82 
   7  -6  -2    0.43    0.29 
   8  -6  -2    1.25    0.45 
   9  -6  -2    0.92    0.70 
  -9  -5  -2    0.63    0.49 
  -8  -5  -2    0.59    0.43 
  -7  -5  -2    3.60    0.61 
  -6  -5  -2    3.15    0.54 
  -5  -5  -2   10.44    0.62 
  -4  -5  -2    9.84    0.55 
  -3  -5  -2   50.45    0.98 
  -2  -5  -2   91.29    1.60 
  -1  -5  -2    4.43    0.22 
   0  -5  -2    2.09    0.15 
   1  -5  -2   19.94    0.41 
   2  -5  -2  128.49    2.00 
   3  -5  -2    3.48    0.20 
   4  -5  -2   33.26    0.67 
   5  -5  -2   10.47    0.40 
   6  -5  -2    4.22    0.29 
   7  -5  -2    2.85    0.36 
   8  -5  -2    0.38    0.32 
   9  -5  -2   -0.28    0.62 
  -9  -4  -2    0.14    0.43 
  -8  -4  -2    7.47    0.87 
  -7  -4  -2    8.85    0.86 
  -6  -4  -2    0.24    0.30 
  -5  -4  -2   26.30    1.01 
  -4  -4  -2   28.36    0.88 
  -3  -4  -2   99.88    2.16 
  -2  -4  -2  109.44    1.88 
  -1  -4  -2   15.66    0.39 
   0  -4  -2  172.05    2.85 
   1  -4  -2   99.17    1.69 
   2  -4  -2   42.01    0.77 
   3  -4  -2   81.86    1.15 
   4  -4  -2   42.11    0.67 
   5  -4  -2   40.73    0.71 
   6  -4  -2   45.93    0.81 
   7  -4  -2    1.14    0.19 
   8  -4  -2    2.91    0.46 
   9  -4  -2    1.79    0.82 
  -9  -3  -2    0.49    0.39 
  -8  -3  -2    0.13    0.36 
  -7  -3  -2    5.02    0.66 
  -6  -3  -2    1.45    0.42 
  -5  -3  -2    0.16    0.19 
  -4  -3  -2    2.20    0.25 
  -3  -3  -2    6.08    0.36 
  -2  -3  -2   11.26    0.44 
  -1  -3  -2    1.26    0.11 
   0  -3  -2    3.62    0.18 
   1  -3  -2   27.63    0.52 
   2  -3  -2  172.11    2.35 
   3  -3  -2    0.21    0.08 
   4  -3  -2   18.19    0.44 
   5  -3  -2    0.09    0.12 
   6  -3  -2   17.18    0.51 
   7  -3  -2    0.35    0.16 
   8  -3  -2    1.38    0.32 
   9  -3  -2    0.20    0.50 
  -9  -2  -2    0.67    0.51 
  -8  -2  -2    5.99    0.62 
  -7  -2  -2   13.20    1.03 
  -6  -2  -2    3.87    0.55 
  -5  -2  -2   59.14    1.47 
  -4  -2  -2   71.12    1.62 
  -3  -2  -2   77.25    1.67 
  -2  -2  -2  205.87    3.97 
  -1  -2  -2   -0.08    0.07 
   0  -2  -2  142.55    2.10 
   1  -2  -2   85.98    1.30 
   2  -2  -2    1.39    0.12 
   3  -2  -2  282.13    3.28 
   4  -2  -2    0.21    0.09 
   5  -2  -2   14.19    0.42 
   6  -2  -2   11.93    0.42 
   7  -2  -2   -0.08    0.14 
   8  -2  -2    7.74    0.67 
   9  -2  -2    1.31    0.71 
  -9  -1  -2    0.25    0.46 
  -8  -1  -2    0.81    0.34 
  -7  -1  -2    7.13    0.63 
  -6  -1  -2   -0.28    0.27 
  -5  -1  -2    1.02    0.24 
  -4  -1  -2    6.11    0.37 
  -3  -1  -2    2.50    0.21 
  -2  -1  -2   28.73    0.70 
  -1  -1  -2   14.80    0.36 
   0  -1  -2    3.32    0.14 
   1  -1  -2    8.95    0.25 
   2  -1  -2  103.80    1.40 
   3  -1  -2   38.25    0.57 
   4  -1  -2   15.07    0.40 
   5  -1  -2    0.52    0.13 
   6  -1  -2    0.06    0.13 
   7  -1  -2    0.03    0.17 
   8  -1  -2    1.85    0.41 
   9  -1  -2   -0.28    0.53 
  -9   0  -2    6.86    0.89 
  -8   0  -2   14.66    1.18 
  -7   0  -2    2.22    0.39 
  -6   0  -2    2.86    0.40 
  -5   0  -2   59.95    1.53 
  -4   0  -2   23.93    0.71 
  -3   0  -2  103.81    1.83 
  -2   0  -2  271.70    4.42 
  -1   0  -2    3.13    0.16 
   0   0  -2   60.83    1.06 
   1   0  -2  986.34   13.96 
   2   0  -2  123.72    1.73 
   3   0  -2  216.00    2.56 
   4   0  -2    0.29    0.09 
   5   0  -2    0.71    0.14 
   6   0  -2    4.96    0.28 
   7   0  -2    0.94    0.23 
   8   0  -2    3.77    0.50 
   9   0  -2    0.21    0.42 
  -9   1  -2   -0.79    0.37 
  -8   1  -2    0.43    0.40 
  -7   1  -2    5.98    0.58 
  -6   1  -2    0.09    0.23 
  -5   1  -2    2.08    0.30 
  -4   1  -2    4.62    0.27 
  -3   1  -2    2.38    0.16 
  -2   1  -2   30.30    0.74 
  -1   1  -2   15.35    0.35 
   0   1  -2    3.36    0.17 
   1   1  -2    9.38    0.36 
   2   1  -2  111.41    1.67 
   3   1  -2   35.58    0.65 
   4   1  -2   15.57    0.43 
   5   1  -2    0.52    0.14 
   6   1  -2    0.17    0.16 
   7   1  -2   -0.08    0.20 
   8   1  -2    1.88    0.39 
   9   1  -2    0.49    0.45 
  -9   2  -2   -0.56    0.38 
  -8   2  -2    5.71    0.76 
  -7   2  -2    9.48    0.90 
  -6   2  -2    4.18    0.44 
  -5   2  -2   56.99    1.49 
  -4   2  -2   71.28    1.36 
  -3   2  -2   77.82    1.68 
  -2   2  -2  209.75    3.98 
  -1   2  -2    0.09    0.10 
   0   2  -2  142.88    2.11 
   1   2  -2   83.88    1.46 
   2   2  -2    1.20    0.13 
   3   2  -2  281.57    3.80 
   4   2  -2    0.03    0.10 
   5   2  -2   13.80    0.52 
   6   2  -2   11.76    0.53 
   7   2  -2    0.20    0.24 
   8   2  -2    7.84    0.67 
   9   2  -2    0.23    0.43 
  -9   3  -2    0.35    0.45 
  -8   3  -2   -0.02    0.36 
  -7   3  -2    4.62    0.64 
  -6   3  -2    2.57    0.45 
  -5   3  -2    0.05    0.17 
  -4   3  -2    1.58    0.17 
  -3   3  -2    6.49    0.36 
  -2   3  -2   10.37    0.39 
  -1   3  -2    0.89    0.11 
   0   3  -2    3.46    0.18 
   1   3  -2   28.48    0.58 
   2   3  -2  173.29    2.90 
   3   3  -2    0.67    0.11 
   4   3  -2   17.73    0.53 
   5   3  -2    0.44    0.16 
   6   3  -2   19.27    0.81 
   7   3  -2    0.18    0.26 
   8   3  -2    1.70    0.41 
   9   3  -2    0.22    0.45 
  -9   4  -2    0.55    0.51 
  -8   4  -2    7.15    0.86 
  -7   4  -2    9.53    0.89 
  -6   4  -2    0.16    0.29 
  -5   4  -2   28.23    0.95 
  -4   4  -2   27.41    0.83 
  -3   4  -2  105.43    2.12 
  -2   4  -2  108.96    2.17 
  -1   4  -2   15.32    0.40 
   0   4  -2  173.04    3.29 
   1   4  -2   97.07    1.71 
   2   4  -2   42.55    1.00 
   3   4  -2   81.12    1.35 
   4   4  -2   41.13    0.83 
   5   4  -2   43.43    1.00 
   6   4  -2   45.85    1.27 
   7   4  -2    0.57    0.31 
   8   4  -2    3.88    0.52 
   9   4  -2    1.27    0.57 
  -9   5  -2    1.54    0.56 
  -8   5  -2   -0.14    0.35 
  -7   5  -2    2.64    0.53 
  -6   5  -2    3.66    0.53 
  -5   5  -2   11.62    0.80 
  -4   5  -2   10.40    0.50 
  -3   5  -2   48.78    1.00 
  -2   5  -2   87.40    1.59 
  -1   5  -2    5.26    0.23 
   0   5  -2    2.25    0.16 
   1   5  -2   20.04    0.40 
   2   5  -2  131.11    2.27 
   3   5  -2    4.06    0.20 
   4   5  -2   33.27    0.73 
   5   5  -2   12.72    0.62 
   6   5  -2    5.23    0.42 
   7   5  -2    2.82    0.41 
   8   5  -2    0.13    0.32 
   9   5  -2    0.21    0.45 
  -9   6  -2   -0.23    0.40 
  -8   6  -2    1.28    0.40 
  -7   6  -2    6.00    0.59 
  -6   6  -2    0.81    0.28 
  -5   6  -2   34.46    1.24 
  -4   6  -2    3.86    0.37 
  -3   6  -2   12.39    0.40 
  -2   6  -2   90.94    1.59 
  -1   6  -2    0.26    0.09 
   0   6  -2  318.26    5.16 
   1   6  -2   24.49    0.50 
   2   6  -2   14.10    0.50 
   3   6  -2   57.65    1.25 
   4   6  -2   33.25    0.97 
   5   6  -2   14.30    0.66 
   6   6  -2   19.67    0.97 
   7   6  -2    0.08    0.28 
   8   6  -2    0.88    0.47 
   9   6  -2    1.18    0.56 
  -9   7  -2    4.21    0.75 
  -8   7  -2    1.10    0.47 
  -7   7  -2    2.00    0.41 
  -6   7  -2   21.46    1.01 
  -5   7  -2    1.71    0.31 
  -4   7  -2   53.47    1.41 
  -3   7  -2   90.55    2.02 
  -2   7  -2    0.50    0.16 
  -1   7  -2  104.28    1.82 
   0   7  -2   13.24    0.41 
   1   7  -2   68.82    1.14 
   2   7  -2   56.75    1.16 
   3   7  -2    0.21    0.15 
   4   7  -2   34.44    1.00 
   5   7  -2    2.99    0.34 
   6   7  -2    7.28    0.59 
   7   7  -2   14.26    0.90 
   8   7  -2    0.01    0.40 
   9   7  -2    3.26    0.72 
  -8   8  -2   -0.12    0.39 
  -7   8  -2    1.71    0.49 
  -6   8  -2    2.54    0.39 
  -5   8  -2   35.50    1.20 
  -4   8  -2    8.79    0.55 
  -3   8  -2    2.99    0.32 
  -2   8  -2   41.89    1.06 
  -1   8  -2   34.94    0.74 
   0   8  -2   25.88    0.63 
   1   8  -2    2.32    0.17 
   2   8  -2    0.15    0.12 
   3   8  -2    0.82    0.19 
   4   8  -2    1.96    0.27 
   5   8  -2    5.13    0.50 
   6   8  -2    0.21    0.26 
   7   8  -2   15.16    0.91 
   8   8  -2    1.72    0.55 
   9   8  -2    1.30    0.58 
  -8   9  -2    0.08    0.40 
  -7   9  -2    1.42    0.48 
  -6   9  -2   11.62    0.97 
  -5   9  -2    1.81    0.32 
  -4   9  -2  108.48    2.47 
  -3   9  -2   29.46    0.97 
  -2   9  -2   77.59    1.76 
  -1   9  -2  512.01    9.60 
   0   9  -2   83.84    1.37 
   1   9  -2   47.61    0.90 
   2   9  -2   88.33    1.47 
   3   9  -2    0.61    0.19 
   4   9  -2   57.77    1.34 
   5   9  -2   32.77    1.25 
   6   9  -2   14.03    0.87 
   7   9  -2   14.54    0.93 
   8   9  -2    1.75    0.59 
  -8  10  -2    0.26    0.43 
  -7  10  -2    1.59    0.48 
  -6  10  -2    0.29    0.34 
  -5  10  -2    1.78    0.42 
  -4  10  -2    3.83    0.40 
  -3  10  -2    4.40    0.40 
  -2  10  -2   34.28    0.97 
  -1  10  -2    5.22    0.38 
   0  10  -2   10.09    0.44 
   1  10  -2   22.92    0.58 
   2  10  -2    0.14    0.11 
   3  10  -2    0.30    0.20 
   4  10  -2    0.91    0.28 
   5  10  -2    6.71    0.56 
   6  10  -2   -0.03    0.27 
   7  10  -2    0.35    0.33 
   8  10  -2   -0.51    0.42 
  -8  11  -2   -0.13    0.43 
  -7  11  -2    4.02    0.65 
  -6  11  -2   17.57    1.28 
  -5  11  -2    2.06    0.45 
  -4  11  -2   84.29    2.53 
  -3  11  -2   33.31    1.08 
  -2  11  -2   12.24    0.62 
  -1  11  -2  206.77    3.58 
   0  11  -2   34.00    0.81 
   1  11  -2   55.35    1.17 
   2  11  -2  112.57    2.52 
   3  11  -2    2.42    0.34 
   4  11  -2   29.03    1.18 
   5  11  -2   25.16    1.13 
   6  11  -2    7.63    0.66 
   7  11  -2    3.57    0.57 
   8  11  -2    0.37    0.53 
  -8  12  -2    0.33    0.48 
  -7  12  -2    1.68    0.55 
  -6  12  -2    0.27    0.39 
  -5  12  -2    4.57    0.63 
  -4  12  -2   -0.24    0.28 
  -3  12  -2   -0.10    0.25 
  -2  12  -2    2.76    0.33 
  -1  12  -2    0.16    0.15 
   0  12  -2    3.48    0.29 
   1  12  -2    0.40    0.16 
   2  12  -2    1.79    0.30 
   3  12  -2    4.19    0.44 
   4  12  -2    2.25    0.37 
   5  12  -2   -0.02    0.25 
   6  12  -2    0.51    0.33 
   7  12  -2    0.64    0.46 
   8  12  -2   -0.07    0.48 
  -7  13  -2    3.39    0.67 
  -6  13  -2   28.54    1.66 
  -5  13  -2   -0.11    0.31 
  -4  13  -2   10.27    0.86 
  -3  13  -2   35.94    1.66 
  -2  13  -2    3.21    0.39 
  -1  13  -2   25.24    0.80 
   0  13  -2   20.61    0.72 
   1  13  -2   52.29    1.41 
   2  13  -2   34.93    1.25 
   3  13  -2    1.66    0.33 
   4  13  -2   24.63    1.09 
   5  13  -2    0.80    0.32 
   6  13  -2   -0.01    0.32 
   7  13  -2    4.80    0.76 
  -7  14  -2    0.70    0.50 
  -6  14  -2    4.05    0.68 
  -5  14  -2    0.22    0.36 
  -4  14  -2   11.61    0.96 
  -3  14  -2   24.57    1.10 
  -2  14  -2   19.25    0.91 
  -1  14  -2    8.70    0.57 
   0  14  -2   44.29    1.07 
   1  14  -2   24.77    1.00 
   2  14  -2    2.60    0.38 
   3  14  -2    3.03    0.41 
   4  14  -2    0.11    0.26 
   5  14  -2    1.85    0.39 
   6  14  -2    2.27    0.46 
   7  14  -2    1.13    0.59 
  -7  15  -2    1.27    0.56 
  -6  15  -2    2.30    0.57 
  -5  15  -2    2.49    0.56 
  -4  15  -2    5.51    0.57 
  -3  15  -2   10.20    0.70 
  -2  15  -2    8.36    0.62 
  -1  15  -2   40.24    1.31 
   0  15  -2    6.33    0.50 
   1  15  -2   12.55    0.73 
   2  15  -2   33.44    1.28 
   3  15  -2    0.34    0.27 
   4  15  -2   12.83    0.84 
   5  15  -2   17.03    0.99 
   6  15  -2    0.31    0.33 
   7  15  -2    2.76    0.68 
  -6  16  -2    3.17    0.55 
  -5  16  -2    4.50    0.56 
  -4  16  -2   -0.08    0.25 
  -3  16  -2   10.18    0.73 
  -2  16  -2   13.09    0.79 
  -1  16  -2    0.31    0.25 
   0  16  -2   13.03    0.97 
   1  16  -2   18.71    1.15 
   2  16  -2    2.98    0.41 
   3  16  -2    7.12    0.62 
   4  16  -2    1.05    0.34 
   5  16  -2    0.23    0.32 
   6  16  -2    2.30    0.51 
   7  16  -2    0.06    0.55 
  -6  17  -2    1.58    0.45 
  -5  17  -2    0.31    0.34 
  -4  17  -2   10.12    0.79 
  -3  17  -2   12.72    0.83 
  -2  17  -2    1.18    0.34 
  -1  17  -2   35.09    1.34 
   0  17  -2   -0.23    0.33 
   1  17  -2    5.40    0.67 
   2  17  -2   18.40    1.22 
   3  17  -2    0.08    0.27 
   4  17  -2    9.08    0.73 
   5  17  -2    4.12    0.58 
   6  17  -2    0.11    0.47 
  -6  18  -2    0.09    0.39 
  -5  18  -2    6.76    0.70 
  -4  18  -2    4.46    0.57 
  -3  18  -2    0.08    0.30 
  -2  18  -2   14.95    0.89 
  -1  18  -2    0.64    0.39 
   0  18  -2   11.39    0.95 
   1  18  -2    3.22    0.57 
   2  18  -2    0.00    0.33 
   3  18  -2   17.56    1.21 
   4  18  -2    3.00    0.50 
   5  18  -2    0.70    0.38 
   6  18  -2    1.24    0.58 
  -5  19  -2   -0.01    0.38 
  -4  19  -2    3.28    0.53 
  -3  19  -2   11.77    0.86 
  -2  19  -2    0.00    0.28 
  -1  19  -2    3.78    0.64 
   0  19  -2    3.15    0.59 
   1  19  -2    9.20    0.88 
   2  19  -2    4.50    0.66 
   3  19  -2    0.09    0.38 
   4  19  -2    1.93    0.55 
   5  19  -2    0.62    0.48 
  -4  20  -2    2.46    0.51 
  -3  20  -2    5.03    0.61 
  -2  20  -2    9.37    0.96 
  -1  20  -2   -0.09    0.35 
   0  20  -2   15.14    1.17 
   1  20  -2   10.57    0.99 
   2  20  -2    1.82    0.53 
   3  20  -2   11.35    1.06 
   4  20  -2    2.53    0.61 
   5  20  -2    0.74    0.55 
  -4  21  -2    0.83    0.43 
  -3  21  -2    0.30    0.37 
  -2  21  -2    0.14    0.43 
  -1  21  -2    3.90    0.65 
   0  21  -2    0.63    0.45 
   1  21  -2    1.29    0.52 
   2  21  -2    0.06    0.41 
   3  21  -2    0.24    0.45 
   4  21  -2    2.50    0.64 
  -3  22  -2    2.90    0.67 
  -2  22  -2   14.82    1.25 
  -1  22  -2    0.18    0.44 
   0  22  -2   11.01    1.08 
   1  22  -2    5.16    0.80 
   2  22  -2    1.08    0.51 
   3  22  -2    8.10    0.98 
  -1  23  -2   -0.13    0.44 
   0  23  -2    0.60    0.50 
   1  23  -2    0.92    0.53 
  -2 -23  -1    0.56    0.68 
  -1 -23  -1   13.14    1.19 
   0 -23  -1    0.48    0.45 
   1 -23  -1    2.23    0.62 
   2 -23  -1    8.74    0.97 
  -3 -22  -1    0.30    0.64 
  -2 -22  -1    3.02    0.95 
  -1 -22  -1   -0.17    0.34 
   0 -22  -1   -0.07    0.37 
   1 -22  -1   -0.03    0.37 
   2 -22  -1   -0.18    0.37 
   3 -22  -1    1.09    0.54 
  -4 -21  -1    5.31    1.21 
  -3 -21  -1    1.96    0.80 
  -2 -21  -1    5.59    1.17 
  -1 -21  -1   16.72    1.28 
   0 -21  -1    0.59    0.42 
   1 -21  -1   12.20    1.07 
   2 -21  -1    8.07    0.73 
   3 -21  -1    0.03    0.31 
   4 -21  -1    6.93    0.86 
  -5 -20  -1    0.17    0.47 
  -4 -20  -1    1.38    0.54 
  -3 -20  -1    0.13    0.55 
  -2 -20  -1    1.19    0.45 
  -1 -20  -1    0.74    0.41 
   0 -20  -1    5.24    0.69 
   1 -20  -1    0.33    0.38 
   2 -20  -1    0.26    0.31 
   3 -20  -1    3.53    0.52 
   4 -20  -1   -0.56    0.35 
   5 -20  -1    1.43    0.55 
  -5 -19  -1   -0.17    0.42 
  -4 -19  -1   11.09    1.06 
  -3 -19  -1    0.29    0.39 
  -2 -19  -1   18.05    1.20 
  -1 -19  -1   16.65    1.18 
   0 -19  -1    0.27    0.34 
   1 -19  -1   25.30    1.26 
   2 -19  -1   17.70    1.01 
   3 -19  -1    0.10    0.28 
   4 -19  -1    3.56    0.66 
   5 -19  -1    2.44    0.62 
  -6 -18  -1    0.29    0.49 
  -5 -18  -1    7.95    0.94 
  -4 -18  -1    4.86    0.73 
  -3 -18  -1    2.11    0.52 
  -2 -18  -1    5.55    0.54 
  -1 -18  -1    0.21    0.31 
   0 -18  -1    6.29    0.68 
   1 -18  -1    0.69    0.30 
   2 -18  -1    7.79    0.65 
   3 -18  -1   10.71    0.78 
   4 -18  -1    0.21    0.37 
   5 -18  -1    3.03    0.65 
   6 -18  -1    1.71    0.54 
  -6 -17  -1    4.03    0.58 
  -5 -17  -1    0.79    0.36 
  -4 -17  -1   10.85    1.02 
  -3 -17  -1    5.05    0.69 
  -2 -17  -1    8.02    0.63 
  -1 -17  -1    2.29    0.46 
   0 -17  -1    2.83    0.50 
   1 -17  -1   17.05    0.89 
   2 -17  -1   11.35    0.77 
   3 -17  -1    0.00    0.24 
   4 -17  -1    3.41    0.55 
   5 -17  -1    0.88    0.45 
   6 -17  -1    0.08    0.41 
  -7 -16  -1    0.53    0.43 
  -6 -16  -1   -0.08    0.32 
  -5 -16  -1   13.42    0.90 
  -4 -16  -1   -0.05    0.26 
  -3 -16  -1   38.71    1.84 
  -2 -16  -1   23.58    1.05 
  -1 -16  -1    7.09    0.55 
   0 -16  -1   30.97    1.19 
   1 -16  -1   21.44    0.99 
   2 -16  -1   10.86    0.71 
   3 -16  -1   25.79    1.16 
   4 -16  -1    3.60    0.48 
   5 -16  -1    8.10    0.87 
   6 -16  -1    3.56    0.64 
   7 -16  -1   -0.04    0.44 
  -7 -15  -1    4.13    0.60 
  -6 -15  -1    0.26    0.33 
  -5 -15  -1    0.77    0.34 
  -4 -15  -1   15.91    0.90 
  -3 -15  -1    0.30    0.26 
  -2 -15  -1    0.74    0.27 
  -1 -15  -1   25.87    1.03 
   0 -15  -1    7.17    0.46 
   1 -15  -1    6.43    0.53 
   2 -15  -1    8.18    0.61 
   3 -15  -1    5.02    0.49 
   4 -15  -1    0.70    0.29 
   5 -15  -1    9.48    0.92 
   6 -15  -1   -0.04    0.39 
   7 -15  -1    1.21    0.51 
  -7 -14  -1    0.45    0.39 
  -6 -14  -1    2.23    0.46 
  -5 -14  -1   17.62    1.00 
  -4 -14  -1   -0.29    0.22 
  -3 -14  -1   47.03    1.38 
  -2 -14  -1   15.58    0.78 
  -1 -14  -1   -0.15    0.19 
   0 -14  -1  127.87    2.39 
   1 -14  -1   35.88    1.21 
   2 -14  -1   41.56    1.23 
   3 -14  -1   26.52    1.11 
   4 -14  -1    0.17    0.23 
   5 -14  -1    4.47    0.65 
   6 -14  -1    6.96    0.66 
   7 -14  -1    3.56    0.55 
  -8 -13  -1    0.43    0.52 
  -7 -13  -1   -0.14    0.33 
  -6 -13  -1    1.12    0.39 
  -5 -13  -1    1.39    0.36 
  -4 -13  -1   -0.25    0.21 
  -3 -13  -1    3.06    0.38 
  -2 -13  -1    0.82    0.24 
  -1 -13  -1   10.44    0.49 
   0 -13  -1    1.19    0.21 
   1 -13  -1    0.53    0.18 
   2 -13  -1    0.60    0.24 
   3 -13  -1   -0.29    0.20 
   4 -13  -1    8.45    0.61 
   5 -13  -1    0.14    0.28 
   6 -13  -1   -0.13    0.28 
   7 -13  -1    1.98    0.45 
   8 -13  -1    1.53    0.58 
  -8 -12  -1    3.18    0.68 
  -7 -12  -1    4.26    0.56 
  -6 -12  -1    6.06    0.62 
  -5 -12  -1   33.11    1.37 
  -4 -12  -1    2.32    0.37 
  -3 -12  -1   25.67    1.00 
  -2 -12  -1   59.44    1.51 
  -1 -12  -1    0.10    0.14 
   0 -12  -1  112.83    2.11 
   1 -12  -1   33.55    0.84 
   2 -12  -1   48.96    1.29 
   3 -12  -1   58.88    1.56 
   4 -12  -1    1.37    0.27 
   5 -12  -1    6.89    0.53 
   6 -12  -1   10.29    0.75 
   7 -12  -1    1.70    0.42 
   8 -12  -1   11.95    1.15 
  -8 -11  -1   -0.21    0.45 
  -7 -11  -1    0.70    0.34 
  -6 -11  -1    0.17    0.29 
  -5 -11  -1   -0.10    0.24 
  -4 -11  -1    0.11    0.22 
  -3 -11  -1    4.45    0.40 
  -2 -11  -1    1.47    0.25 
  -1 -11  -1    6.77    0.37 
   0 -11  -1    4.45    0.30 
   1 -11  -1    1.87    0.20 
   2 -11  -1    3.30    0.26 
   3 -11  -1   15.42    0.75 
   4 -11  -1    1.28    0.27 
   5 -11  -1    0.96    0.26 
   6 -11  -1    4.34    0.52 
   7 -11  -1    0.18    0.30 
   8 -11  -1   -0.56    0.35 
  -8 -10  -1    4.12    0.72 
  -7 -10  -1    3.63    0.52 
  -6 -10  -1    2.20    0.42 
  -5 -10  -1   41.76    1.45 
  -4 -10  -1    2.15    0.34 
  -3 -10  -1   95.48    2.13 
  -2 -10  -1  118.45    2.53 
  -1 -10  -1    0.38    0.13 
   0 -10  -1  100.24    1.83 
   1 -10  -1   99.81    1.84 
   2 -10  -1   11.73    0.47 
   3 -10  -1   58.12    1.28 
   4 -10  -1   16.96    0.71 
   5 -10  -1   43.44    1.20 
   6 -10  -1   20.90    1.04 
   7 -10  -1    2.71    0.46 
   8 -10  -1    0.57    0.47 
  -8  -9  -1   -0.05    0.39 
  -7  -9  -1    0.02    0.29 
  -6  -9  -1    7.56    0.63 
  -5  -9  -1    1.92    0.35 
  -4  -9  -1   13.30    0.73 
  -3  -9  -1    9.56    0.51 
  -2  -9  -1    5.43    0.37 
  -1  -9  -1   23.46    0.59 
   0  -9  -1   16.78    0.52 
   1  -9  -1   22.96    0.63 
   2  -9  -1    5.16    0.29 
   3  -9  -1   19.44    0.55 
   4  -9  -1   15.08    0.63 
   5  -9  -1    1.03    0.25 
   6  -9  -1    4.90    0.50 
   7  -9  -1    5.57    0.58 
   8  -9  -1    0.01    0.38 
  -9  -8  -1   -0.25    0.46 
  -8  -8  -1    3.50    0.68 
  -7  -8  -1    6.52    0.62 
  -6  -8  -1    9.76    0.70 
  -5  -8  -1   33.92    1.29 
  -4  -8  -1    5.75    0.47 
  -3  -8  -1   33.15    0.90 
  -2  -8  -1  221.08    4.33 
  -1  -8  -1    0.08    0.10 
   0  -8  -1   48.01    0.96 
   1  -8  -1   16.62    0.51 
   2  -8  -1    0.55    0.13 
   3  -8  -1  103.98    1.72 
   4  -8  -1    5.79    0.33 
   5  -8  -1   21.37    0.81 
   6  -8  -1   18.45    0.92 
   7  -8  -1    1.01    0.34 
   8  -8  -1    2.12    0.54 
   9  -8  -1    0.19    0.44 
  -9  -7  -1    0.24    0.47 
  -8  -7  -1    0.77    0.44 
  -7  -7  -1    0.45    0.38 
  -6  -7  -1   16.32    0.89 
  -5  -7  -1    0.06    0.22 
  -4  -7  -1   22.60    0.92 
  -3  -7  -1   23.91    0.75 
  -2  -7  -1    8.50    0.43 
  -1  -7  -1  103.03    1.82 
   0  -7  -1    0.03    0.08 
   1  -7  -1   49.78    0.96 
   2  -7  -1   75.68    1.24 
   3  -7  -1    5.95    0.29 
   4  -7  -1   26.34    0.67 
   5  -7  -1    3.61    0.33 
   6  -7  -1    6.49    0.54 
   7  -7  -1   13.52    0.72 
   8  -7  -1   -0.40    0.35 
   9  -7  -1    1.41    0.80 
  -9  -6  -1   -0.04    0.44 
  -8  -6  -1    4.56    0.71 
  -7  -6  -1    0.27    0.34 
  -6  -6  -1    6.77    0.56 
  -5  -6  -1   22.97    0.96 
  -4  -6  -1    8.23    0.40 
  -3  -6  -1   48.61    0.99 
  -2  -6  -1   38.00    0.90 
  -1  -6  -1   38.39    0.85 
   0  -6  -1  182.73    3.00 
   1  -6  -1    3.40    0.21 
   2  -6  -1   17.40    0.44 
   3  -6  -1  100.36    1.65 
   4  -6  -1   15.02    0.51 
   5  -6  -1   21.91    0.63 
   6  -6  -1    3.07    0.31 
   7  -6  -1    3.51    0.39 
   8  -6  -1    3.75    0.52 
   9  -6  -1    1.32    0.55 
  -9  -5  -1    1.44    0.57 
  -8  -5  -1    0.87    0.44 
  -7  -5  -1    0.85    0.38 
  -6  -5  -1   15.63    0.84 
  -5  -5  -1    4.50    0.43 
  -4  -5  -1   96.57    1.84 
  -3  -5  -1   57.56    1.13 
  -2  -5  -1  197.68    3.76 
  -1  -5  -1  711.31   12.90 
   0  -5  -1  218.99    3.15 
   1  -5  -1  143.66    2.37 
   2  -5  -1  130.39    1.99 
   3  -5  -1   22.36    0.55 
   4  -5  -1   52.35    0.90 
   5  -5  -1   13.84    0.48 
   6  -5  -1    2.64    0.26 
   7  -5  -1    8.00    0.54 
   8  -5  -1   -0.12    0.29 
   9  -5  -1    1.21    0.53 
  -9  -4  -1   -0.03    0.42 
  -8  -4  -1    3.93    0.64 
  -7  -4  -1    1.01    0.41 
  -6  -4  -1    3.66    0.42 
  -5  -4  -1    1.37    0.27 
  -4  -4  -1    0.94    0.14 
  -3  -4  -1   64.95    1.18 
  -2  -4  -1   16.06    0.41 
  -1  -4  -1  278.19    4.51 
   0  -4  -1  461.94    6.65 
   1  -4  -1   74.29    1.33 
   2  -4  -1    0.60    0.08 
   3  -4  -1  122.26    1.64 
   4  -4  -1    0.67    0.11 
   5  -4  -1    9.05    0.33 
   6  -4  -1    2.94    0.24 
   7  -4  -1    1.58    0.30 
   8  -4  -1    0.05    0.38 
   9  -4  -1    0.32    0.43 
  -9  -3  -1    3.73    0.72 
  -8  -3  -1    6.39    0.81 
  -7  -3  -1   10.00    0.89 
  -6  -3  -1   13.67    0.75 
  -5  -3  -1   -0.24    0.17 
  -4  -3  -1  205.87    3.51 
  -3  -3  -1  117.86    2.06 
  -2  -3  -1   11.00    0.32 
  -1  -3  -1  413.17    6.56 
   0  -3  -1    6.53    0.18 
   1  -3  -1    2.03    0.11 
   2  -3  -1  238.80    2.72 
   3  -3  -1    0.21    0.08 
   4  -3  -1   83.67    1.12 
   5  -3  -1   17.94    0.47 
   6  -3  -1   16.89    0.50 
   7  -3  -1    3.25    0.37 
   8  -3  -1   -0.13    0.28 
   9  -3  -1    2.65    0.64 
  -9  -2  -1    0.22    0.48 
  -8  -2  -1    9.60    0.95 
  -7  -2  -1    3.71    0.58 
  -6  -2  -1    3.30    0.45 
  -5  -2  -1    1.00    0.24 
  -4  -2  -1    0.11    0.10 
  -3  -2  -1    0.07    0.08 
  -2  -2  -1   82.16    1.67 
  -1  -2  -1   33.67    0.62 
   0  -2  -1   15.57    0.32 
   1  -2  -1   13.06    0.28 
   2  -2  -1  205.01    2.37 
   3  -2  -1    1.56    0.11 
   4  -2  -1    1.23    0.13 
   5  -2  -1    7.61    0.30 
   6  -2  -1    1.66    0.19 
   7  -2  -1    0.12    0.19 
   8  -2  -1    1.84    0.39 
   9  -2  -1   -0.27    0.42 
  -9  -1  -1    4.79    0.77 
  -8  -1  -1   -0.26    0.27 
  -7  -1  -1   27.59    1.47 
  -6  -1  -1   22.56    1.24 
  -5  -1  -1    2.84    0.31 
  -4  -1  -1    6.34    0.31 
  -3  -1  -1   14.44    0.39 
  -2  -1  -1  127.15    2.11 
  -1  -1  -1   81.70    1.57 
   0  -1  -1    6.18    0.15 
   1  -1  -1  688.62    8.19 
   2  -1  -1  121.28    1.44 
   3  -1  -1    6.74    0.22 
   4  -1  -1  130.43    1.65 
   5  -1  -1   15.64    0.43 
   6  -1  -1    6.54    0.30 
   7  -1  -1   11.70    0.64 
   8  -1  -1    1.38    0.37 
   9  -1  -1    1.46    0.53 
  -9   0  -1    0.19    0.45 
  -8   0  -1    0.00    0.29 
  -7   0  -1   -0.17    0.23 
  -6   0  -1    0.13    0.27 
  -5   0  -1    0.10    0.17 
  -4   0  -1    0.01    0.13 
  -3   0  -1    0.27    0.11 
  -2   0  -1    0.09    0.08 
  -1   0  -1    0.08    0.05 
   0   0  -1    0.06    0.03 
   1   0  -1    0.08    0.04 
   2   0  -1    0.04    0.06 
   3   0  -1    0.16    0.07 
   4   0  -1    0.07    0.09 
   5   0  -1   -0.04    0.10 
   6   0  -1    0.16    0.15 
   7   0  -1   -0.14    0.19 
   8   0  -1    0.35    0.31 
   9   0  -1   -0.03    0.40 
  -9   1  -1    4.58    0.76 
  -8   1  -1   -0.46    0.30 
  -7   1  -1   27.15    1.20 
  -6   1  -1   22.51    0.99 
  -5   1  -1    2.55    0.29 
  -4   1  -1    7.18    0.40 
  -3   1  -1   14.65    0.46 
  -2   1  -1  126.81    2.42 
  -1   1  -1   81.57    1.91 
   0   1  -1    5.95    0.13 
   1   1  -1  679.75    8.81 
   2   1  -1  118.54    1.53 
   3   1  -1    7.04    0.23 
   4   1  -1  131.69    1.66 
   5   1  -1   15.44    0.49 
   6   1  -1    5.77    0.36 
   7   1  -1   14.39    0.70 
   8   1  -1    1.05    0.35 
   9   1  -1    3.23    0.65 
  -9   2  -1    0.74    0.48 
  -8   2  -1    8.34    0.90 
  -7   2  -1    3.63    0.57 
  -6   2  -1    1.62    0.32 
  -5   2  -1    0.70    0.17 
  -4   2  -1    0.38    0.12 
  -3   2  -1    0.33    0.10 
  -2   2  -1   82.30    1.65 
  -1   2  -1   34.22    0.71 
   0   2  -1   16.11    0.32 
   1   2  -1   14.49    0.33 
   2   2  -1  203.78    3.00 
   3   2  -1    1.25    0.12 
   4   2  -1    0.45    0.11 
   5   2  -1    6.47    0.32 
   6   2  -1    1.46    0.26 
   7   2  -1   -0.07    0.24 
   8   2  -1    1.91    0.42 
   9   2  -1    0.03    0.40 
  -9   3  -1    3.31    0.69 
  -8   3  -1    4.53    0.68 
  -7   3  -1   12.51    0.96 
  -6   3  -1   13.56    0.73 
  -5   3  -1    0.02    0.17 
  -4   3  -1  207.25    3.49 
  -3   3  -1  117.87    2.39 
  -2   3  -1   11.69    0.37 
  -1   3  -1  415.64    6.55 
   0   3  -1    5.71    0.20 
   1   3  -1    1.67    0.14 
   2   3  -1  232.43    3.45 
   3   3  -1    0.32    0.10 
   4   3  -1   81.03    1.28 
   5   3  -1   17.27    0.52 
   6   3  -1   17.53    0.72 
   7   3  -1    3.32    0.45 
   8   3  -1   -0.24    0.27 
   9   3  -1    1.95    0.47 
  -9   4  -1    0.67    0.45 
  -8   4  -1    3.60    0.64 
  -7   4  -1    1.15    0.40 
  -6   4  -1    3.03    0.49 
  -5   4  -1    1.39    0.25 
  -4   4  -1    0.59    0.16 
  -3   4  -1   59.28    1.33 
  -2   4  -1   14.12    0.38 
  -1   4  -1  279.25    5.22 
   0   4  -1  473.57    7.44 
   1   4  -1   76.14    1.17 
   2   4  -1    0.64    0.09 
   3   4  -1  128.30    2.50 
   4   4  -1    1.18    0.16 
   5   4  -1    8.66    0.46 
   6   4  -1    3.66    0.36 
   7   4  -1    1.43    0.35 
   8   4  -1    0.17    0.32 
   9   4  -1    0.28    0.37 
  -9   5  -1    1.30    0.51 
  -8   5  -1    0.40    0.31 
  -7   5  -1    0.81    0.36 
  -6   5  -1   14.86    0.99 
  -5   5  -1    6.33    0.58 
  -4   5  -1  101.03    2.11 
  -3   5  -1   57.53    1.11 
  -2   5  -1  197.33    3.79 
  -1   5  -1  712.78   12.91 
   0   5  -1  213.44    4.06 
   1   5  -1  138.80    2.10 
   2   5  -1  127.48    1.98 
   3   5  -1   19.52    0.53 
   4   5  -1   50.22    0.99 
   5   5  -1   12.26    0.55 
   6   5  -1    3.81    0.45 
   7   5  -1    7.20    0.64 
   8   5  -1    0.15    0.30 
   9   5  -1    0.09    0.38 
  -9   6  -1    0.09    0.39 
  -8   6  -1    4.48    0.70 
  -7   6  -1    0.63    0.30 
  -6   6  -1    6.15    0.52 
  -5   6  -1   20.70    0.88 
  -4   6  -1    9.77    0.40 
  -3   6  -1   45.72    0.94 
  -2   6  -1   36.93    0.91 
  -1   6  -1   34.37    0.86 
   0   6  -1  178.72    2.67 
   1   6  -1    4.18    0.19 
   2   6  -1   16.88    0.44 
   3   6  -1  100.52    1.83 
   4   6  -1   15.58    0.56 
   5   6  -1   21.51    0.96 
   6   6  -1    3.57    0.45 
   7   6  -1    3.58    0.50 
   8   6  -1    2.19    0.45 
   9   6  -1    0.94    0.44 
  -9   7  -1   -0.60    0.39 
  -8   7  -1    0.29    0.41 
  -7   7  -1    0.76    0.41 
  -6   7  -1   16.29    0.84 
  -5   7  -1    0.51    0.24 
  -4   7  -1   23.38    0.82 
  -3   7  -1   22.27    0.75 
  -2   7  -1   10.03    0.45 
  -1   7  -1  106.26    2.13 
   0   7  -1    0.19    0.09 
   1   7  -1   46.79    0.95 
   2   7  -1   70.86    1.36 
   3   7  -1    7.38    0.33 
   4   7  -1   26.30    0.83 
   5   7  -1    2.48    0.36 
   6   7  -1    6.98    0.60 
   7   7  -1   14.02    0.87 
   8   7  -1    0.06    0.31 
   9   7  -1    1.97    0.50 
  -9   8  -1    0.38    0.47 
  -8   8  -1    2.34    0.57 
  -7   8  -1    7.11    0.80 
  -6   8  -1   10.23    0.88 
  -5   8  -1   34.46    1.18 
  -4   8  -1    6.29    0.44 
  -3   8  -1   30.98    0.89 
  -2   8  -1  224.65    4.33 
  -1   8  -1    0.21    0.12 
   0   8  -1   47.22    0.96 
   1   8  -1   17.41    0.50 
   2   8  -1    0.62    0.12 
   3   8  -1  103.35    1.91 
   4   8  -1    5.60    0.46 
   5   8  -1   22.17    0.99 
   6   8  -1   18.06    0.97 
   7   8  -1    0.91    0.36 
   8   8  -1    3.04    0.52 
   9   8  -1    0.26    0.41 
  -8   9  -1    0.67    0.43 
  -7   9  -1    0.63    0.38 
  -6   9  -1    9.31    0.84 
  -5   9  -1    1.10    0.38 
  -4   9  -1   17.83    0.77 
  -3   9  -1    9.45    0.51 
  -2   9  -1    4.48    0.33 
  -1   9  -1   22.90    0.64 
   0   9  -1   16.30    0.51 
   1   9  -1   20.94    0.58 
   2   9  -1    5.32    0.29 
   3   9  -1   21.08    0.61 
   4   9  -1   13.13    0.72 
   5   9  -1    0.45    0.29 
   6   9  -1    4.85    0.53 
   7   9  -1    5.27    0.59 
   8   9  -1   -0.14    0.33 
  -8  10  -1    2.03    0.56 
  -7  10  -1    4.40    0.69 
  -6  10  -1    2.50    0.52 
  -5  10  -1   46.09    1.79 
  -4  10  -1    1.96    0.41 
  -3  10  -1   95.78    2.11 
  -2  10  -1  120.28    2.51 
  -1  10  -1    0.13    0.11 
   0  10  -1   98.55    1.82 
   1  10  -1  100.69    1.84 
   2  10  -1   10.59    0.44 
   3  10  -1   57.88    1.50 
   4  10  -1   19.52    0.89 
   5  10  -1   44.89    1.49 
   6  10  -1   22.90    1.12 
   7  10  -1    2.57    0.47 
   8  10  -1    1.32    0.43 
  -8  11  -1   -0.07    0.39 
  -7  11  -1    1.03    0.47 
  -6  11  -1    0.26    0.34 
  -5  11  -1    0.07    0.30 
  -4  11  -1    0.51    0.32 
  -3  11  -1    4.36    0.51 
  -2  11  -1    1.09    0.19 
  -1  11  -1    8.22    0.40 
   0  11  -1    3.50    0.27 
   1  11  -1    1.42    0.19 
   2  11  -1    2.47    0.24 
   3  11  -1   17.16    0.80 
   4  11  -1    1.07    0.30 
   5  11  -1    0.45    0.28 
   6  11  -1    3.61    0.49 
   7  11  -1    0.06    0.32 
   8  11  -1   -0.24    0.35 
  -8  12  -1    3.12    0.67 
  -7  12  -1    3.31    0.65 
  -6  12  -1    6.78    0.80 
  -5  12  -1   37.42    1.76 
  -4  12  -1    2.82    0.49 
  -3  12  -1   23.97    1.00 
  -2  12  -1   61.23    1.55 
  -1  12  -1    0.44    0.16 
   0  12  -1  112.89    2.11 
   1  12  -1   35.51    0.86 
   2  12  -1   44.70    1.04 
   3  12  -1   60.11    1.59 
   4  12  -1    1.80    0.35 
   5  12  -1    6.68    0.60 
   6  12  -1    9.04    0.72 
   7  12  -1    2.67    0.51 
   8  12  -1   11.77    0.94 
  -8  13  -1    0.28    0.47 
  -7  13  -1   -0.01    0.38 
  -6  13  -1    0.60    0.40 
  -5  13  -1    1.25    0.43 
  -4  13  -1    0.22    0.24 
  -3  13  -1    3.43    0.41 
  -2  13  -1    1.13    0.28 
  -1  13  -1   10.37    0.60 
   0  13  -1    1.28    0.21 
   1  13  -1    0.60    0.18 
   2  13  -1    1.25    0.29 
   3  13  -1    0.19    0.24 
   4  13  -1   10.01    0.68 
   5  13  -1    0.34    0.30 
   6  13  -1   -0.22    0.28 
   7  13  -1    2.83    0.54 
   8  13  -1    1.54    0.49 
  -7  14  -1    0.13    0.34 
  -6  14  -1    1.25    0.39 
  -5  14  -1   16.41    0.96 
  -4  14  -1    0.18    0.26 
  -3  14  -1   49.30    1.42 
  -2  14  -1   16.54    0.83 
  -1  14  -1    0.01    0.20 
   0  14  -1  131.14    2.81 
   1  14  -1   37.94    0.97 
   2  14  -1   38.52    1.24 
   3  14  -1   24.25    1.08 
   4  14  -1    0.53    0.28 
   5  14  -1    6.02    0.61 
   6  14  -1    8.56    0.74 
   7  14  -1    3.80    0.57 
  -7  15  -1    3.47    0.57 
  -6  15  -1    0.39    0.33 
  -5  15  -1    0.16    0.29 
  -4  15  -1   13.24    0.85 
  -3  15  -1    0.81    0.30 
  -2  15  -1    0.88    0.27 
  -1  15  -1   25.52    1.05 
   0  15  -1    8.72    0.58 
   1  15  -1    6.65    0.68 
   2  15  -1   10.16    0.65 
   3  15  -1    4.06    0.46 
   4  15  -1    0.63    0.29 
   5  15  -1    8.53    0.73 
   6  15  -1    0.22    0.32 
   7  15  -1    0.31    0.39 
  -7  16  -1    1.00    0.55 
  -6  16  -1    0.14    0.33 
  -5  16  -1   15.28    0.96 
  -4  16  -1    0.27    0.29 
  -3  16  -1   42.23    1.52 
  -2  16  -1   23.26    1.07 
  -1  16  -1    7.07    0.56 
   0  16  -1   30.47    1.17 
   1  16  -1   23.32    1.29 
   2  16  -1   11.98    0.93 
   3  16  -1   21.70    1.06 
   4  16  -1    2.86    0.46 
   5  16  -1   10.37    0.77 
   6  16  -1    2.80    0.51 
   7  16  -1   -0.40    0.37 
  -6  17  -1    2.41    0.49 
  -5  17  -1    1.05    0.36 
  -4  17  -1   12.45    0.84 
  -3  17  -1    5.45    0.56 
  -2  17  -1    8.48    0.65 
  -1  17  -1    2.92    0.40 
   0  17  -1    3.16    0.41 
   1  17  -1   17.65    1.17 
   2  17  -1   11.43    0.93 
   3  17  -1   -0.11    0.35 
   4  17  -1    3.61    0.52 
   5  17  -1    0.75    0.36 
   6  17  -1   -0.10    0.35 
  -6  18  -1    0.19    0.48 
  -5  18  -1    9.84    0.81 
  -4  18  -1    5.23    0.59 
  -3  18  -1    2.16    0.42 
  -2  18  -1    6.74    0.61 
  -1  18  -1   -0.05    0.24 
   0  18  -1    7.14    0.77 
   1  18  -1    0.44    0.35 
   2  18  -1    6.73    0.78 
   3  18  -1   10.77    0.98 
   4  18  -1    0.82    0.44 
   5  18  -1    2.69    0.50 
   6  18  -1    0.19    0.40 
  -5  19  -1   -0.01    0.45 
  -4  19  -1   10.31    0.82 
  -3  19  -1    0.11    0.30 
  -2  19  -1   19.99    1.05 
  -1  19  -1   16.91    0.93 
   0  19  -1    0.32    0.37 
   1  19  -1   24.07    1.46 
   2  19  -1   16.53    1.22 
   3  19  -1    0.12    0.37 
   4  19  -1    2.46    0.59 
   5  19  -1    3.24    0.68 
  -5  20  -1    0.76    0.54 
  -4  20  -1    1.01    0.41 
  -3  20  -1   -0.10    0.31 
  -2  20  -1    0.98    0.35 
  -1  20  -1    0.10    0.39 
   0  20  -1    6.02    0.76 
   1  20  -1    0.33    0.39 
   2  20  -1    0.66    0.43 
   3  20  -1    3.99    0.67 
   4  20  -1   -0.12    0.41 
   5  20  -1    1.45    0.57 
  -4  21  -1    8.93    1.01 
  -3  21  -1    2.87    0.50 
  -2  21  -1    4.95    0.67 
  -1  21  -1   17.36    1.29 
   0  21  -1    1.24    0.51 
   1  21  -1   12.02    1.06 
   2  21  -1    8.74    0.94 
   3  21  -1    0.55    0.46 
   4  21  -1    7.81    0.94 
  -3  22  -1   -0.40    0.40 
  -2  22  -1    2.68    0.62 
  -1  22  -1   -0.03    0.41 
   0  22  -1   -0.46    0.38 
   1  22  -1    0.11    0.40 
   2  22  -1    0.50    0.46 
   3  22  -1    1.41    0.57 
  -2  23  -1    0.52    0.77 
  -1  23  -1   14.05    1.23 
   0  23  -1    0.25    0.46 
   1  23  -1    2.78    0.66 
   2  23  -1    7.97    0.97 
  -2 -23   0    2.84    0.67 
  -1 -23   0    0.54    0.46 
   0 -23   0    0.20    0.43 
   1 -23   0    0.48    0.46 
   2 -23   0    2.26    0.92 
  -3 -22   0    7.61    1.35 
  -2 -22   0    6.34    0.84 
  -1 -22   0    1.78    0.54 
   0 -22   0    6.06    0.80 
   1 -22   0    1.13    0.49 
   2 -22   0    5.11    0.76 
   3 -22   0    9.70    1.03 
  -4 -21   0    0.73    0.75 
  -3 -21   0   -0.05    0.62 
  -2 -21   0    4.10    0.66 
  -1 -21   0    1.63    0.51 
   0 -21   0   -0.04    0.34 
   1 -21   0    0.51    0.41 
   2 -21   0    3.20    0.50 
   3 -21   0    0.51    0.43 
   4 -21   0   -0.14    0.43 
  -5 -20   0    9.22    1.03 
  -4 -20   0    1.92    0.56 
  -3 -20   0   17.05    1.92 
  -2 -20   0    6.89    0.80 
  -1 -20   0    4.05    0.65 
   0 -20   0   37.99    1.90 
   1 -20   0    3.16    0.61 
   2 -20   0    7.30    0.66 
   3 -20   0   13.04    1.11 
   4 -20   0    1.05    0.50 
   5 -20   0    7.59    0.94 
  -5 -19   0    0.36    0.43 
  -4 -19   0    0.60    0.47 
  -3 -19   0   -0.05    0.36 
  -2 -19   0    3.27    0.58 
  -1 -19   0   13.33    1.05 
   0 -19   0    0.03    0.31 
   1 -19   0   12.75    0.83 
   2 -19   0    3.89    0.49 
   3 -19   0   -0.03    0.33 
   4 -19   0    0.81    0.45 
   5 -19   0   -0.16    0.42 
  -6 -18   0    2.37    0.51 
  -5 -18   0    8.17    0.93 
  -4 -18   0    0.92    0.45 
  -3 -18   0   22.14    1.10 
  -2 -18   0    3.30    0.57 
  -1 -18   0    7.27    0.74 
   0 -18   0   28.25    1.52 
   1 -18   0    6.63    0.58 
   2 -18   0    3.92    0.49 
   3 -18   0   19.16    1.02 
   4 -18   0    0.27    0.37 
   5 -18   0    8.00    0.93 
   6 -18   0    1.19    0.53 
  -6 -17   0    3.55    0.58 
  -5 -17   0    0.34    0.44 
  -4 -17   0   16.71    1.23 
  -3 -17   0    2.61    0.42 
  -2 -17   0   16.42    0.89 
  -1 -17   0   12.86    0.97 
   0 -17   0   -0.21    0.27 
   1 -17   0   15.69    0.85 
   2 -17   0   15.40    0.88 
   3 -17   0    1.97    0.38 
   4 -17   0   14.39    1.13 
   5 -17   0    0.49    0.42 
   6 -17   0    3.81    0.70 
  -7 -16   0   -0.11    0.36 
  -6 -16   0    0.53    0.38 
  -5 -16   0    3.14    0.60 
  -4 -16   0    0.14    0.36 
  -3 -16   0    8.45    0.65 
  -2 -16   0    9.36    0.65 
  -1 -16   0    0.26    0.23 
   0 -16   0   19.58    0.91 
   1 -16   0    0.23    0.22 
   2 -16   0   11.63    0.72 
   3 -16   0    6.32    0.56 
   4 -16   0   -0.04    0.30 
   5 -16   0    4.41    0.54 
   6 -16   0    0.30    0.33 
   7 -16   0    0.50    0.40 
  -7 -15   0    3.40    0.57 
  -6 -15   0    5.85    0.64 
  -5 -15   0    0.95    0.45 
  -4 -15   0   41.13    1.97 
  -3 -15   0    1.55    0.33 
  -2 -15   0   19.72    0.93 
  -1 -15   0   54.42    1.46 
   0 -15   0   -0.07    0.20 
   1 -15   0   53.29    1.47 
   2 -15   0   20.92    0.95 
   3 -15   0    1.36    0.31 
   4 -15   0   44.20    1.61 
   5 -15   0    0.75    0.33 
   6 -15   0    7.25    0.71 
   7 -15   0    3.25    0.55 
  -7 -14   0    3.14    0.58 
  -6 -14   0    1.24    0.50 
  -5 -14   0    0.09    0.32 
  -4 -14   0    1.10    0.43 
  -3 -14   0    1.68    0.33 
  -2 -14   0   13.91    0.74 
  -1 -14   0   11.71    0.66 
   0 -14   0    5.57    0.37 
   1 -14   0    9.18    0.59 
   2 -14   0   14.79    0.77 
   3 -14   0    1.18    0.30 
   4 -14   0    1.35    0.33 
   5 -14   0    0.31    0.28 
   6 -14   0    1.68    0.40 
   7 -14   0    1.93    0.44 
  -8 -13   0    0.82    0.42 
  -7 -13   0   12.27    0.93 
  -6 -13   0    6.57    0.82 
  -5 -13   0    3.47    0.60 
  -4 -13   0   30.86    1.60 
  -3 -13   0   32.52    1.21 
  -2 -13   0   27.60    1.06 
  -1 -13   0   75.06    1.53 
   0 -13   0   -0.04    0.13 
   1 -13   0   76.36    1.82 
   2 -13   0   26.99    1.04 
   3 -13   0   32.44    1.04 
   4 -13   0   28.26    0.99 
   5 -13   0    4.91    0.52 
   6 -13   0    5.86    0.61 
   7 -13   0   12.29    0.88 
   8 -13   0    0.61    0.51 
  -8 -12   0    0.60    0.41 
  -7 -12   0    0.22    0.33 
  -6 -12   0    2.09    0.54 
  -5 -12   0    0.41    0.34 
  -4 -12   0    0.34    0.31 
  -3 -12   0    5.06    0.45 
  -2 -12   0    7.39    0.51 
  -1 -12   0    2.79    0.26 
   0 -12   0    0.18    0.14 
   1 -12   0    2.97    0.24 
   2 -12   0    9.28    0.56 
   3 -12   0    3.57    0.34 
   4 -12   0    0.10    0.20 
   5 -12   0    0.67    0.28 
   6 -12   0    1.29    0.38 
   7 -12   0   -0.21    0.30 
   8 -12   0   -0.14    0.42 
  -8 -11   0    0.03    0.34 
  -7 -11   0    8.66    0.76 
  -6 -11   0    2.45    0.53 
  -5 -11   0    2.44    0.49 
  -4 -11   0   61.83    1.59 
  -3 -11   0   12.22    0.65 
  -2 -11   0   70.15    1.66 
  -1 -11   0   87.07    1.65 
   0 -11   0    0.07    0.12 
   1 -11   0   87.32    1.64 
   2 -11   0   69.39    1.44 
   3 -11   0   13.93    0.60 
   4 -11   0   60.97    1.38 
   5 -11   0    2.49    0.39 
   6 -11   0    1.98    0.38 
   7 -11   0    8.26    0.71 
   8 -11   0    0.45    0.46 
  -8 -10   0    0.08    0.42 
  -7 -10   0   -0.01    0.31 
  -6 -10   0   -0.26    0.30 
  -5 -10   0   -0.26    0.28 
  -4 -10   0    0.99    0.25 
  -3 -10   0   12.19    0.64 
  -2 -10   0    6.96    0.33 
  -1 -10   0    2.99    0.23 
   0 -10   0   31.09    0.73 
   1 -10   0    3.09    0.22 
   2 -10   0    7.27    0.27 
   3 -10   0   12.94    0.55 
   4 -10   0    0.57    0.21 
   5 -10   0    0.08    0.23 
   6 -10   0    0.47    0.27 
   7 -10   0   -0.18    0.28 
   8 -10   0   -0.17    0.39 
  -8  -9   0    0.10    0.40 
  -7  -9   0    4.13    0.53 
  -6  -9   0    3.99    0.59 
  -5  -9   0    3.58    0.55 
  -4  -9   0   65.75    1.61 
  -3  -9   0   12.72    0.61 
  -2  -9   0   91.78    1.67 
  -1  -9   0   70.37    1.33 
   0  -9   0   -0.02    0.09 
   1  -9   0   70.88    1.32 
   2  -9   0   91.17    1.49 
   3  -9   0   12.28    0.52 
   4  -9   0   65.97    1.39 
   5  -9   0    4.16    0.44 
   6  -9   0    3.27    0.42 
   7  -9   0    4.60    0.52 
   8  -9   0    0.62    0.45 
  -9  -8   0    0.14    0.49 
  -8  -8   0    1.84    0.54 
  -7  -8   0    0.21    0.29 
  -6  -8   0    0.94    0.37 
  -5  -8   0    5.22    0.60 
  -4  -8   0    5.37    0.42 
  -3  -8   0   53.86    1.34 
  -2  -8   0   10.27    0.35 
  -1  -8   0    4.16    0.24 
   0  -8   0    4.13    0.23 
   1  -8   0    4.57    0.21 
   2  -8   0   11.25    0.32 
   3  -8   0   56.91    1.00 
   4  -8   0    3.74    0.31 
   5  -8   0    5.44    0.41 
   6  -8   0    1.95    0.32 
   7  -8   0   -0.48    0.29 
   8  -8   0    1.99    0.54 
   9  -8   0    0.58    0.47 
  -9  -7   0    2.34    0.65 
  -8  -7   0    2.60    0.60 
  -7  -7   0    8.19    0.68 
  -6  -7   0   15.26    0.86 
  -5  -7   0    5.76    0.64 
  -4  -7   0   44.31    1.16 
  -3  -7   0   27.01    0.82 
  -2  -7   0   22.52    0.66 
  -1  -7   0  110.91    1.90 
   0  -7   0    0.00    0.08 
   1  -7   0  108.65    1.70 
   2  -7   0   22.43    0.49 
   3  -7   0   28.10    0.60 
   4  -7   0   44.24    1.01 
   5  -7   0    5.22    0.34 
   6  -7   0   16.68    0.73 
   7  -7   0    9.34    0.71 
   8  -7   0    2.31    0.46 
   9  -7   0    3.03    0.70 
  -9  -6   0    0.39    0.48 
  -8  -6   0    2.30    0.59 
  -7  -6   0    0.40    0.30 
  -6  -6   0   17.35    0.93 
  -5  -6   0    6.40    0.62 
  -4  -6   0   11.51    0.55 
  -3  -6   0   55.55    1.32 
  -2  -6   0   18.21    0.58 
  -1  -6   0   56.00    1.04 
   0  -6   0   21.93    0.48 
   1  -6   0   56.57    0.92 
   2  -6   0   18.51    0.42 
   3  -6   0   58.01    1.00 
   4  -6   0   10.90    0.37 
   5  -6   0    6.54    0.37 
   6  -6   0   20.58    0.81 
   7  -6   0    0.11    0.26 
   8  -6   0    2.94    0.47 
   9  -6   0    0.11    0.47 
  -9  -5   0    0.66    0.49 
  -8  -5   0    1.81    0.51 
  -7  -5   0    4.19    0.51 
  -6  -5   0   25.13    1.10 
  -5  -5   0   14.44    0.92 
  -4  -5   0   33.74    0.91 
  -3  -5   0   24.27    0.69 
  -2  -5   0   81.24    1.68 
  -1  -5   0  360.69    5.72 
   0  -5   0    0.02    0.08 
   1  -5   0  354.55    5.12 
   2  -5   0   79.82    1.27 
   3  -5   0   23.92    0.49 
   4  -5   0   32.45    0.63 
   5  -5   0   14.05    0.52 
   6  -5   0   27.73    0.95 
   7  -5   0    3.04    0.42 
   8  -5   0    0.91    0.35 
   9  -5   0    0.07    0.45 
  -9  -4   0   -0.25    0.39 
  -8  -4   0    4.17    0.67 
  -7  -4   0    3.02    0.43 
  -6  -4   0    4.41    0.48 
  -5  -4   0   79.36    1.95 
  -4  -4   0    1.21    0.20 
  -3  -4   0   43.93    0.88 
  -2  -4   0   54.08    1.18 
  -1  -4   0   14.55    0.34 
   0  -4   0   27.96    0.53 
   1  -4   0   14.80    0.33 
   2  -4   0   54.94    0.83 
   3  -4   0   48.29    0.76 
   4  -4   0    0.91    0.13 
   5  -4   0   80.91    1.33 
   6  -4   0    6.25    0.40 
   7  -4   0    2.82    0.41 
   8  -4   0    3.40    0.60 
   9  -4   0    0.80    0.48 
  -9  -3   0    0.71    0.46 
  -8  -3   0   -0.07    0.35 
  -7  -3   0    1.73    0.47 
  -6  -3   0    1.70    0.33 
  -5  -3   0   20.89    0.71 
  -4  -3   0    5.81    0.37 
  -3  -3   0    1.61    0.19 
  -2  -3   0    2.50    0.19 
  -1  -3   0  174.12    3.94 
   0  -3   0    0.02    0.04 
   1  -3   0  170.19    2.77 
   2  -3   0    1.90    0.12 
   3  -3   0    0.93    0.10 
   4  -3   0    4.49    0.22 
   5  -3   0   17.50    0.53 
   6  -3   0    2.69    0.27 
   7  -3   0    1.85    0.30 
   8  -3   0   -0.22    0.28 
   9  -3   0    0.62    0.47 
  -9  -2   0    0.50    0.44 
  -8  -2   0    8.27    0.89 
  -7  -2   0   10.52    0.90 
  -6  -2   0   11.86    0.71 
  -5  -2   0   78.30    1.57 
  -4  -2   0    9.37    0.47 
  -3  -2   0   92.94    1.96 
  -2  -2   0  335.92    6.24 
  -1  -2   0   85.12    1.64 
   0  -2   0  341.61    5.37 
   1  -2   0   85.82    1.15 
   2  -2   0  339.75    3.82 
   3  -2   0   97.02    1.20 
   4  -2   0    9.43    0.31 
   5  -2   0   78.20    1.28 
   6  -2   0   11.45    0.50 
   7  -2   0   11.10    0.62 
   8  -2   0    9.55    0.73 
   9  -2   0   -0.21    0.31 
  -9  -1   0    0.99    0.49 
  -8  -1   0    0.51    0.40 
  -7  -1   0    0.19    0.30 
  -6  -1   0    0.04    0.21 
  -5  -1   0    1.65    0.21 
  -4  -1   0    4.98    0.29 
  -3  -1   0    0.52    0.13 
  -2  -1   0  175.97    3.40 
  -1  -1   0   39.16    0.77 
   0  -1   0    0.01    0.01 
   1  -1   0   37.21    0.47 
   2  -1   0  182.04    2.09 
   3  -1   0    0.68    0.09 
   4  -1   0    4.56    0.22 
   5  -1   0    0.58    0.15 
   6  -1   0   -0.17    0.17 
   7  -1   0   -0.20    0.24 
   8  -1   0    0.24    0.31 
   9  -1   0    0.57    0.47 
  -9   0   0    1.46    0.55 
  -8   0   0    5.16    0.56 
  -7   0   0   10.42    0.87 
  -6   0   0   34.74    1.12 
  -5   0   0   25.99    0.75 
  -4   0   0   45.82    1.15 
  -3   0   0  260.06    4.93 
  -2   0   0   82.37    2.00 
  -1   0   0  146.99    3.38 
   1   0   0  148.93    1.69 
   2   0   0   80.88    1.00 
   3   0   0  259.23    3.01 
   4   0   0   46.93    0.81 
   5   0   0   27.29    0.64 
   6   0   0   34.17    0.91 
   7   0   0    9.10    0.66 
   8   0   0    6.09    0.61 
   9   0   0    2.76    0.64 
  -9   1   0    0.56    0.44 
  -8   1   0    0.85    0.41 
  -7   1   0    0.24    0.25 
  -6   1   0    0.05    0.20 
  -5   1   0    0.90    0.21 
  -4   1   0    5.04    0.35 
  -3   1   0    0.89    0.18 
  -2   1   0  186.16    4.18 
  -1   1   0   37.12    0.94 
   0   1   0   -0.02    0.01 
   1   1   0   38.91    0.60 
   2   1   0  177.00    2.23 
   3   1   0    0.48    0.09 
   4   1   0    4.61    0.23 
   5   1   0    1.07    0.18 
   6   1   0    0.16    0.17 
   7   1   0    0.21    0.22 
   8   1   0    0.74    0.33 
   9   1   0    0.66    0.48 
  -9   2   0   -0.07    0.39 
  -8   2   0    9.13    0.89 
  -7   2   0   11.50    0.73 
  -6   2   0   11.75    0.69 
  -5   2   0   76.73    1.57 
  -4   2   0    9.23    0.59 
  -3   2   0   96.85    1.97 
  -2   2   0  336.09    7.64 
  -1   2   0   84.56    1.62 
   0   2   0  339.39    5.37 
   1   2   0   83.36    1.42 
   2   2   0  331.04    4.83 
   3   2   0   93.61    1.52 
   4   2   0    8.60    0.35 
   5   2   0   79.19    1.40 
   6   2   0   12.11    0.61 
   7   2   0   10.76    0.63 
   8   2   0    7.75    0.86 
   9   2   0   -0.14    0.43 
  -9   3   0    0.26    0.41 
  -8   3   0    0.50    0.39 
  -7   3   0    2.19    0.47 
  -6   3   0    2.20    0.34 
  -5   3   0   17.08    0.65 
  -4   3   0    4.20    0.32 
  -3   3   0    1.18    0.16 
  -2   3   0    1.82    0.17 
  -1   3   0  171.05    3.20 
   0   3   0    0.04    0.04 
   1   3   0  170.41    2.78 
   2   3   0    2.75    0.18 
   3   3   0    1.45    0.13 
   4   3   0    5.31    0.26 
   5   3   0   19.47    0.57 
   6   3   0    2.64    0.31 
   7   3   0    1.47    0.30 
   8   3   0   -0.31    0.36 
   9   3   0   -0.33    0.40 
  -9   4   0    0.25    0.40 
  -8   4   0    4.35    0.66 
  -7   4   0    1.73    0.42 
  -6   4   0    5.30    0.46 
  -5   4   0   80.81    1.86 
  -4   4   0    0.94    0.18 
  -3   4   0   47.66    0.92 
  -2   4   0   54.86    1.17 
  -1   4   0   15.19    0.39 
   0   4   0   26.71    0.53 
   1   4   0   15.03    0.37 
   2   4   0   52.73    1.03 
   3   4   0   43.20    0.80 
   4   4   0    1.76    0.16 
   5   4   0   81.43    1.66 
   6   4   0    4.54    0.39 
   7   4   0    2.91    0.44 
   8   4   0    3.24    0.49 
   9   4   0   -0.09    0.43 
  -9   5   0    0.39    0.43 
  -8   5   0    0.74    0.40 
  -7   5   0    4.03    0.49 
  -6   5   0   25.50    1.08 
  -5   5   0   14.25    0.58 
  -4   5   0   30.68    0.77 
  -3   5   0   24.74    0.58 
  -2   5   0   78.30    1.64 
  -1   5   0  357.73    5.73 
   0   5   0    0.00    0.08 
   1   5   0  357.24    5.74 
   2   5   0   80.98    1.45 
   3   5   0   25.82    0.71 
   4   5   0   33.02    0.81 
   5   5   0   15.37    0.63 
   6   5   0   26.07    0.93 
   7   5   0    4.12    0.50 
   8   5   0    0.86    0.37 
   9   5   0    0.22    0.45 
  -9   6   0    0.42    0.44 
  -8   6   0    2.26    0.51 
  -7   6   0    0.05    0.28 
  -6   6   0   19.57    0.92 
  -5   6   0    5.86    0.46 
  -4   6   0    9.75    0.42 
  -3   6   0   57.37    1.09 
  -2   6   0   18.03    0.53 
  -1   6   0   56.16    1.03 
   0   6   0   21.08    0.48 
   1   6   0   55.12    1.05 
   2   6   0   16.76    0.50 
   3   6   0   54.95    1.15 
   4   6   0   11.81    0.49 
   5   6   0    6.23    0.41 
   6   6   0   17.21    0.93 
   7   6   0    0.25    0.28 
   8   6   0    2.57    0.47 
   9   6   0    0.07    0.46 
  -9   7   0    2.91    0.66 
  -8   7   0    2.06    0.52 
  -7   7   0    8.94    0.86 
  -6   7   0   15.06    0.84 
  -5   7   0    4.56    0.41 
  -4   7   0   44.08    1.15 
  -3   7   0   26.77    0.77 
  -2   7   0   21.69    0.62 
  -1   7   0  110.09    1.90 
   0   7   0    0.09    0.08 
   1   7   0  109.15    1.92 
   2   7   0   22.71    0.59 
   3   7   0   27.64    0.71 
   4   7   0   44.48    1.02 
   5   7   0    5.72    0.39 
   6   7   0   15.59    0.89 
   7   7   0    9.04    0.72 
   8   7   0    1.60    0.44 
   9   7   0    2.68    0.65 
  -9   8   0    0.26    0.46 
  -8   8   0    3.31    0.61 
  -7   8   0    0.56    0.36 
  -6   8   0    2.19    0.46 
  -5   8   0    5.41    0.51 
  -4   8   0    3.97    0.34 
  -3   8   0   57.56    1.31 
  -2   8   0   11.46    0.39 
  -1   8   0    4.81    0.24 
   0   8   0    4.68    0.25 
   1   8   0    4.01    0.24 
   2   8   0   10.03    0.41 
   3   8   0   52.30    1.15 
   4   8   0    4.23    0.32 
   5   8   0    5.50    0.53 
   6   8   0    0.79    0.34 
   7   8   0   -0.18    0.27 
   8   8   0    2.41    0.49 
   9   8   0   -0.23    0.45 
  -8   9   0    0.93    0.48 
  -7   9   0    4.77    0.68 
  -6   9   0    3.74    0.56 
  -5   9   0    3.41    0.50 
  -4   9   0   63.78    1.99 
  -3   9   0   13.65    0.57 
  -2   9   0   90.07    1.67 
  -1   9   0   70.40    1.32 
   0   9   0   -0.02    0.10 
   1   9   0   68.86    1.34 
   2   9   0   90.60    1.70 
   3   9   0   12.36    0.50 
   4   9   0   63.66    1.38 
   5   9   0    3.76    0.45 
   6   9   0    3.57    0.48 
   7   9   0    5.07    0.60 
   8   9   0    0.29    0.37 
  -8  10   0    1.00    0.47 
  -7  10   0   -0.17    0.34 
  -6  10   0    0.14    0.31 
  -5  10   0    0.22    0.30 
  -4  10   0    0.69    0.30 
  -3  10   0   12.64    0.65 
  -2  10   0    7.80    0.35 
  -1  10   0    3.12    0.22 
   0  10   0   31.41    0.73 
   1  10   0    3.27    0.24 
   2  10   0    7.24    0.38 
   3  10   0   11.19    0.50 
   4  10   0    1.25    0.30 
   5  10   0   -0.19    0.24 
   6  10   0    0.10    0.27 
   7  10   0   -0.32    0.27 
   8  10   0    0.23    0.37 
  -8  11   0   -0.01    0.32 
  -7  11   0    9.00    0.91 
  -6  11   0    1.57    0.46 
  -5  11   0    2.38    0.47 
  -4  11   0   60.87    1.63 
  -3  11   0   12.75    0.68 
  -2  11   0   69.46    1.66 
  -1  11   0   86.65    1.64 
   0  11   0    0.10    0.12 
   1  11   0   87.20    1.66 
   2  11   0   68.79    1.41 
   3  11   0   13.02    0.55 
   4  11   0   60.47    1.65 
   5  11   0    2.17    0.39 
   6  11   0    2.33    0.43 
   7  11   0    9.44    0.79 
   8  11   0    0.23    0.37 
  -8  12   0   -0.04    0.41 
  -7  12   0    0.17    0.29 
  -6  12   0    0.53    0.31 
  -5  12   0    0.98    0.30 
  -4  12   0    0.43    0.25 
  -3  12   0    4.38    0.42 
  -2  12   0    8.01    0.53 
  -1  12   0    3.20    0.34 
   0  12   0    0.53    0.15 
   1  12   0    2.66    0.25 
   2  12   0    7.89    0.43 
   3  12   0    5.41    0.37 
   4  12   0    0.13    0.25 
   5  12   0    0.83    0.33 
   6  12   0    1.61    0.42 
   7  12   0    0.23    0.34 
   8  12   0    0.62    0.42 
  -8  13   0    1.54    0.58 
  -7  13   0   11.99    1.10 
  -6  13   0    7.97    0.69 
  -5  13   0    4.59    0.50 
  -4  13   0   29.54    1.21 
  -3  13   0   32.51    1.22 
  -2  13   0   26.17    1.03 
  -1  13   0   75.16    1.81 
   0  13   0   -0.03    0.19 
   1  13   0   76.11    1.54 
   2  13   0   26.59    0.82 
   3  13   0   31.01    1.23 
   4  13   0   27.29    1.17 
   5  13   0    4.52    0.54 
   6  13   0    7.45    0.69 
   7  13   0   12.55    0.93 
   8  13   0    0.44    0.44 
  -7  14   0    1.91    0.59 
  -6  14   0    1.92    0.43 
  -5  14   0   -0.20    0.25 
  -4  14   0    1.49    0.33 
  -3  14   0    0.99    0.30 
  -2  14   0   14.91    0.79 
  -1  14   0    9.59    0.60 
   0  14   0    6.56    0.49 
   1  14   0   11.97    0.65 
   2  14   0   14.68    0.62 
   3  14   0    1.22    0.32 
   4  14   0    2.26    0.39 
   5  14   0    0.28    0.29 
   6  14   0    1.19    0.41 
   7  14   0    2.81    0.53 
  -7  15   0    3.61    0.73 
  -6  15   0    7.53    0.88 
  -5  15   0    1.02    0.34 
  -4  15   0   43.61    1.48 
  -3  15   0    1.32    0.33 
  -2  15   0   22.45    0.99 
  -1  15   0   53.32    1.47 
   0  15   0   -0.14    0.20 
   1  15   0   55.71    1.47 
   2  15   0   21.39    1.01 
   3  15   0    0.98    0.31 
   4  15   0   42.32    1.57 
   5  15   0    0.85    0.36 
   6  15   0    6.91    0.70 
   7  15   0    3.39    0.57 
  -7  16   0   -0.05    0.48 
  -6  16   0    0.31    0.40 
  -5  16   0    3.93    0.53 
  -4  16   0    0.13    0.27 
  -3  16   0    6.79    0.59 
  -2  16   0   10.35    0.69 
  -1  16   0   -0.06    0.24 
   0  16   0   18.68    0.89 
   1  16   0    0.31    0.24 
   2  16   0    9.51    0.83 
   3  16   0    7.03    0.66 
   4  16   0   -0.06    0.26 
   5  16   0    3.88    0.53 
   6  16   0    0.58    0.38 
   7  16   0    0.14    0.40 
  -6  17   0    3.05    0.67 
  -5  17   0    0.60    0.44 
  -4  17   0   17.99    1.02 
  -3  17   0    2.06    0.41 
  -2  17   0   18.76    0.95 
  -1  17   0   15.99    0.85 
   0  17   0    0.25    0.25 
   1  17   0   12.71    0.98 
   2  17   0   15.89    1.12 
   3  17   0    2.09    0.51 
   4  17   0   15.62    1.19 
   5  17   0    0.15    0.34 
   6  17   0    4.58    0.62 
  -6  18   0    1.66    0.59 
  -5  18   0    8.81    0.97 
  -4  18   0    0.09    0.40 
  -3  18   0   22.94    1.14 
  -2  18   0    3.50    0.46 
  -1  18   0    7.01    0.59 
   0  18   0   29.41    1.20 
   1  18   0    7.01    0.76 
   2  18   0    3.71    0.56 
   3  18   0   21.13    1.35 
   4  18   0    0.32    0.41 
   5  18   0    5.94    0.82 
   6  18   0    2.83    0.56 
  -5  19   0    1.03    0.52 
  -4  19   0    1.19    0.52 
  -3  19   0    0.00    0.30 
  -2  19   0    3.29    0.47 
  -1  19   0   14.41    0.86 
   0  19   0   -0.07    0.33 
   1  19   0   12.49    1.03 
   2  19   0    3.80    0.62 
   3  19   0   -0.14    0.36 
   4  19   0    1.05    0.50 
   5  19   0    0.46    0.43 
  -5  20   0   10.41    1.12 
  -4  20   0    1.34    0.54 
  -3  20   0   15.13    1.19 
  -2  20   0    9.25    0.74 
  -1  20   0    4.56    0.54 
   0  20   0   39.26    1.91 
   1  20   0    4.85    0.71 
   2  20   0    7.36    0.81 
   3  20   0   14.18    1.18 
   4  20   0    0.54    0.47 
   5  20   0    7.20    0.93 
  -4  21   0    1.03    0.54 
  -3  21   0    0.88    0.48 
  -2  21   0    2.40    0.58 
  -1  21   0    1.63    0.51 
   0  21   0    0.54    0.42 
   1  21   0    0.75    0.46 
   2  21   0    3.11    0.62 
   3  21   0    0.59    0.47 
   4  21   0    0.19    0.45 
  -3  22   0    9.71    1.03 
  -2  22   0    6.86    0.83 
  -1  22   0    1.48    0.78 
   0  22   0    6.30    0.83 
   1  22   0    3.13    0.63 
   2  22   0    6.22    0.84 
   3  22   0   10.94    1.08 
  -2  23   0    3.51    1.06 
  -1  23   0   -0.24    0.63 
   0  23   0   -0.41    0.56 
   1  23   0    0.27    0.50 
   2  23   0    3.33    0.70 
  -2 -23   1    8.19    0.97 
  -1 -23   1    2.47    0.64 
   0 -23   1   -0.02    0.42 
   1 -23   1   13.19    1.19 
   2 -23   1    0.16    0.65 
  -3 -22   1    1.04    0.78 
  -2 -22   1   -0.08    0.41 
  -1 -22   1    0.13    0.40 
   0 -22   1    0.33    0.41 
   1 -22   1    0.00    0.38 
   2 -22   1    2.55    0.90 
   3 -22   1   -0.31    0.41 
  -4 -21   1    7.06    1.35 
  -3 -21   1    0.20    0.61 
  -2 -21   1    8.68    0.92 
  -1 -21   1   13.07    1.12 
   0 -21   1    0.81    0.45 
   1 -21   1   17.15    1.26 
   2 -21   1    6.99    0.84 
   3 -21   1    1.97    0.60 
   4 -21   1    6.97    0.92 
  -5 -20   1    1.73    0.61 
  -4 -20   1    0.39    0.69 
  -3 -20   1    3.53    0.64 
  -2 -20   1    1.08    0.43 
  -1 -20   1    0.25    0.36 
   0 -20   1    4.13    0.66 
   1 -20   1    0.49    0.38 
   2 -20   1    0.62    0.33 
   3 -20   1   -0.09    0.37 
   4 -20   1    1.08    0.49 
   5 -20   1    0.16    0.47 
  -5 -19   1    2.51    0.66 
  -4 -19   1    2.86    0.62 
  -3 -19   1    0.42    0.40 
  -2 -19   1   16.51    1.21 
  -1 -19   1   18.07    1.27 
   0 -19   1    0.00    0.32 
   1 -19   1   18.34    0.98 
   2 -19   1   18.49    1.01 
   3 -19   1    0.45    0.39 
   4 -19   1    9.28    0.95 
   5 -19   1   -0.22    0.38 
  -6 -18   1    0.51    0.53 
  -5 -18   1    1.93    0.56 
  -4 -18   1    0.47    0.41 
  -3 -18   1    8.55    0.69 
  -2 -18   1    8.10    0.82 
  -1 -18   1    0.65    0.37 
   0 -18   1    7.07    0.75 
   1 -18   1    0.06    0.25 
   2 -18   1    6.45    0.58 
   3 -18   1    1.42    0.46 
   4 -18   1    4.20    0.67 
   5 -18   1   10.18    0.82 
   6 -18   1    0.13    0.35 
  -6 -17   1    0.44    0.51 
  -5 -17   1    0.43    0.42 
  -4 -17   1    2.55    0.53 
  -3 -17   1    0.13    0.26 
  -2 -17   1   10.08    0.71 
  -1 -17   1   17.91    1.15 
   0 -17   1    3.58    0.54 
   1 -17   1    3.94    0.45 
   2 -17   1    7.65    0.60 
   3 -17   1    4.19    0.62 
   4 -17   1   11.79    0.81 
   5 -17   1    1.02    0.38 
   6 -17   1    2.67    0.49 
  -7 -16   1    0.41    0.51 
  -6 -16   1    2.16    0.61 
  -5 -16   1    9.33    0.96 
  -4 -16   1    2.69    0.54 
  -3 -16   1   21.80    1.05 
  -2 -16   1   12.63    0.75 
  -1 -16   1   20.07    1.20 
   0 -16   1   33.00    1.23 
   1 -16   1    6.79    0.54 
   2 -16   1   24.40    1.07 
   3 -16   1   40.39    1.85 
   4 -16   1    0.25    0.29 
   5 -16   1   13.15    0.88 
   6 -16   1   -0.02    0.32 
   7 -16   1    0.16    0.39 
  -7 -15   1    1.07    0.55 
  -6 -15   1    0.40    0.42 
  -5 -15   1    8.85    0.94 
  -4 -15   1    0.86    0.31 
  -3 -15   1    3.55    0.42 
  -2 -15   1    9.31    0.63 
  -1 -15   1    7.95    0.56 
   0 -15   1    8.32    0.57 
   1 -15   1   26.56    1.08 
   2 -15   1    0.99    0.29 
   3 -15   1    0.46    0.22 
   4 -15   1   14.33    0.87 
   5 -15   1   -0.14    0.29 
   6 -15   1    0.00    0.32 
   7 -15   1    4.24    0.60 
  -7 -14   1    4.27    0.73 
  -6 -14   1    7.22    0.87 
  -5 -14   1    5.83    0.73 
  -4 -14   1    0.59    0.28 
  -3 -14   1   23.86    1.04 
  -2 -14   1   40.53    1.27 
  -1 -14   1   38.76    0.99 
   0 -14   1  126.89    2.81 
   1 -14   1    0.03    0.20 
   2 -14   1   16.97    0.70 
   3 -14   1   48.53    1.19 
   4 -14   1   -0.05    0.24 
   5 -14   1   17.11    0.96 
   6 -14   1    1.18    0.37 
   7 -14   1    0.69    0.36 
  -8 -13   1    1.35    0.48 
  -7 -13   1    2.42    0.60 
  -6 -13   1   -0.01    0.36 
  -5 -13   1    0.25    0.36 
  -4 -13   1    9.06    0.65 
  -3 -13   1   -0.21    0.20 
  -2 -13   1    1.31    0.28 
  -1 -13   1    0.26    0.16 
   0 -13   1    0.93    0.19 
   1 -13   1   11.03    0.62 
   2 -13   1    0.76    0.21 
   3 -13   1    3.73    0.35 
   4 -13   1   -0.32    0.21 
   5 -13   1    0.94    0.31 
   6 -13   1    0.35    0.30 
   7 -13   1    0.26    0.34 
   8 -13   1    0.33    0.48 
  -8 -12   1   11.40    0.93 
  -7 -12   1    2.67    0.63 
  -6 -12   1    9.76    0.97 
  -5 -12   1    7.18    0.78 
  -4 -12   1    0.87    0.29 
  -3 -12   1   61.08    1.58 
  -2 -12   1   46.54    1.27 
  -1 -12   1   36.31    0.87 
   0 -12   1  114.72    2.11 
   1 -12   1    0.33    0.18 
   2 -12   1   61.48    1.31 
   3 -12   1   26.29    0.81 
   4 -12   1    2.17    0.37 
   5 -12   1   33.25    1.31 
   6 -12   1    5.47    0.56 
   7 -12   1    3.17    0.64 
   8 -12   1    3.60    0.73 
  -8 -11   1    0.28    0.37 
  -7 -11   1   -0.23    0.37 
  -6 -11   1    2.69    0.54 
  -5 -11   1    0.82    0.36 
  -4 -11   1    1.21    0.30 
  -3 -11   1   18.37    0.83 
  -2 -11   1    2.83    0.27 
  -1 -11   1    1.61    0.20 
   0 -11   1    4.48    0.29 
   1 -11   1    7.17    0.30 
   2 -11   1    1.52    0.22 
   3 -11   1    5.25    0.37 
   4 -11   1    0.53    0.26 
   5 -11   1   -0.08    0.23 
   6 -11   1    0.11    0.26 
   7 -11   1    1.13    0.44 
   8 -11   1    0.17    0.41 
  -8 -10   1    1.54    0.46 
  -7 -10   1    2.58    0.61 
  -6 -10   1   18.57    1.27 
  -5 -10   1   39.78    1.86 
  -4 -10   1   19.88    0.89 
  -3 -10   1   59.49    1.50 
  -2 -10   1   10.91    0.44 
  -1 -10   1   99.86    1.84 
   0 -10   1   99.51    1.81 
   1 -10   1    0.07    0.09 
   2 -10   1  119.07    2.19 
   3 -10   1   94.53    1.84 
   4 -10   1    2.07    0.32 
   5 -10   1   42.96    1.43 
   6 -10   1    1.70    0.36 
   7 -10   1    3.08    0.56 
   8 -10   1    3.05    0.64 
  -8  -9   1    0.57    0.37 
  -7  -9   1    4.45    0.71 
  -6  -9   1    4.87    0.66 
  -5  -9   1    0.02    0.31 
  -4  -9   1   13.24    0.70 
  -3  -9   1   19.29    0.81 
  -2  -9   1    6.59    0.32 
  -1  -9   1   20.31    0.57 
   0  -9   1   17.58    0.52 
   1  -9   1   22.55    0.51 
   2  -9   1    4.73    0.31 
   3  -9   1    9.77    0.45 
   4  -9   1   17.85    0.65 
   5  -9   1    1.14    0.29 
   6  -9   1    8.90    0.65 
   7  -9   1   -0.35    0.29 
   8  -9   1   -0.58    0.35 
  -9  -8   1   -0.42    0.43 
  -8  -8   1    1.94    0.45 
  -7  -8   1    0.84    0.41 
  -6  -8   1   17.40    1.17 
  -5  -8   1   22.47    0.98 
  -4  -8   1    6.13    0.47 
  -3  -8   1  104.60    2.28 
  -2  -8   1    0.71    0.13 
  -1  -8   1   18.42    0.51 
   0  -8   1   47.40    0.95 
   1  -8   1    0.12    0.07 
   2  -8   1  221.79    3.75 
   3  -8   1   32.46    0.80 
   4  -8   1    6.27    0.38 
   5  -8   1   35.12    1.05 
   6  -8   1   10.50    0.60 
   7  -8   1    6.15    0.59 
   8  -8   1    2.47    0.47 
   9  -8   1    0.17    0.41 
  -9  -7   1    1.19    0.55 
  -8  -7   1    0.28    0.33 
  -7  -7   1   11.83    1.03 
  -6  -7   1    5.69    0.69 
  -5  -7   1    2.09    0.32 
  -4  -7   1   26.05    0.98 
  -3  -7   1    6.44    0.43 
  -2  -7   1   72.19    1.37 
  -1  -7   1   48.58    0.96 
   0  -7   1    0.05    0.07 
   1  -7   1  105.46    1.62 
   2  -7   1   10.51    0.40 
   3  -7   1   24.57    0.67 
   4  -7   1   24.26    0.65 
   5  -7   1    0.20    0.20 
   6  -7   1   16.75    0.75 
   7  -7   1    1.35    0.36 
   8  -7   1   -0.04    0.31 
   9  -7   1   -0.67    0.44 
  -9  -6   1    0.76    0.52 
  -8  -6   1    2.84    0.60 
  -7  -6   1    1.21    0.43 
  -6  -6   1    3.60    0.56 
  -5  -6   1   20.69    0.90 
  -4  -6   1   16.21    0.73 
  -3  -6   1  103.68    2.18 
  -2  -6   1   17.48    0.48 
  -1  -6   1    3.63    0.21 
   0  -6   1  179.96    2.67 
   1  -6   1   36.23    0.75 
   2  -6   1   37.02    0.79 
   3  -6   1   46.28    0.88 
   4  -6   1    9.79    0.40 
   5  -6   1   20.66    0.77 
   6  -6   1    5.82    0.44 
   7  -6   1    0.46    0.27 
   8  -6   1    3.21    0.50 
   9  -6   1    0.03    0.47 
  -9  -5   1   -0.12    0.42 
  -8  -5   1   -0.13    0.34 
  -7  -5   1    8.77    0.87 
  -6  -5   1    3.45    0.56 
  -5  -5   1   11.95    0.66 
  -4  -5   1   50.60    1.06 
  -3  -5   1   20.30    0.54 
  -2  -5   1  126.88    2.21 
  -1  -5   1  139.05    2.36 
   0  -5   1  216.20    3.51 
   1  -5   1  695.71   11.17 
   2  -5   1  199.47    2.93 
   3  -5   1   58.76    1.02 
   4  -5   1  102.69    1.67 
   5  -5   1    5.89    0.39 
   6  -5   1   15.37    0.69 
   7  -5   1    1.07    0.32 
   8  -5   1    0.78    0.35 
   9  -5   1    1.64    0.58 
  -9  -4   1    0.09    0.41 
  -8  -4   1    0.03    0.36 
  -7  -4   1    1.64    0.37 
  -6  -4   1    3.21    0.55 
  -5  -4   1   10.59    0.61 
  -4  -4   1    1.16    0.16 
  -3  -4   1  124.21    2.47 
  -2  -4   1    0.45    0.10 
  -1  -4   1   76.58    1.53 
   0  -4   1  474.24    8.58 
   1  -4   1  278.52    4.51 
   2  -4   1   15.71    0.38 
   3  -4   1   58.75    1.05 
   4  -4   1    0.33    0.12 
   5  -4   1    1.17    0.22 
   6  -4   1    2.66    0.38 
   7  -4   1    1.24    0.32 
   8  -4   1    3.40    0.64 
   9  -4   1    0.12    0.43 
  -9  -3   1    2.08    0.59 
  -8  -3   1   -0.30    0.34 
  -7  -3   1    3.59    0.47 
  -6  -3   1   15.96    1.06 
  -5  -3   1   16.48    0.61 
  -4  -3   1   80.72    1.56 
  -3  -3   1    0.43    0.11 
  -2  -3   1  230.56    4.43 
  -1  -3   1    1.90    0.15 
   0  -3   1    5.81    0.20 
   1  -3   1  413.00    5.87 
   2  -3   1   10.81    0.29 
   3  -3   1  120.44    1.85 
   4  -3   1  207.07    2.88 
   5  -3   1    0.11    0.14 
   6  -3   1   11.98    0.62 
   7  -3   1   12.07    0.67 
   8  -3   1    4.87    0.68 
   9  -3   1    2.82    0.64 
  -9  -2   1   -0.02    0.40 
  -8  -2   1    1.14    0.44 
  -7  -2   1   -0.02    0.25 
  -6  -2   1    0.79    0.35 
  -5  -2   1    6.66    0.48 
  -4  -2   1    0.32    0.13 
  -3  -2   1    1.07    0.16 
  -2  -2   1  205.94    3.87 
  -1  -2   1   14.73    0.37 
   0  -2   1   16.41    0.32 
   1  -2   1   34.68    0.64 
   2  -2   1   78.91    1.26 
   3  -2   1    0.17    0.08 
   4  -2   1    0.49    0.13 
   5  -2   1    0.60    0.16 
   6  -2   1    2.15    0.30 
   7  -2   1    3.31    0.37 
   8  -2   1    8.63    0.73 
   9  -2   1    0.39    0.44 
  -9  -1   1    2.59    0.63 
  -8  -1   1    0.64    0.41 
  -7  -1   1   12.93    0.80 
  -6  -1   1    6.91    0.52 
  -5  -1   1   16.18    0.72 
  -4  -1   1  130.84    2.72 
  -3  -1   1    7.18    0.47 
  -2  -1   1  118.90    2.35 
  -1  -1   1  678.35   12.45 
   0  -1   1    6.41    0.15 
   1  -1   1   80.84    1.36 
   2  -1   1  125.66    1.91 
   3  -1   1   13.91    0.39 
   4  -1   1    7.02    0.31 
   5  -1   1    3.00    0.24 
   6  -1   1   22.98    0.83 
   7  -1   1   27.59    1.22 
   8  -1   1    0.40    0.32 
   9  -1   1    6.17    0.66 
  -9   0   1    0.02    0.38 
  -8   0   1    0.12    0.33 
  -7   0   1    0.06    0.27 
  -6   0   1    0.12    0.18 
  -5   0   1   -0.16    0.14 
  -4   0   1    0.09    0.13 
  -1   0   1    0.21    0.06 
   0   0   1    0.07    0.04 
   1   0   1    0.06    0.04 
   2   0   1    0.05    0.06 
   3   0   1    0.04    0.08 
   4   0   1    0.01    0.09 
   5   0   1   -0.06    0.12 
   6   0   1   -0.05    0.18 
   7   0   1    0.27    0.28 
   8   0   1   -0.01    0.30 
   9   0   1    0.57    0.38 
  -9   1   1    3.40    0.68 
  -8   1   1    1.20    0.35 
  -7   1   1   13.21    0.97 
  -6   1   1    6.10    0.42 
  -5   1   1   16.69    0.93 
  -1   1   1  688.32   12.44 
   0   1   1    5.94    0.22 
   1   1   1   80.58    1.37 
   2   1   1  126.76    1.89 
   3   1   1   14.31    0.36 
   4   1   1    7.34    0.31 
   5   1   1    2.13    0.25 
   6   1   1   24.92    0.87 
   7   1   1   28.27    1.19 
   8   1   1   -0.05    0.29 
   9   1   1    5.36    0.80 
  -9   2   1   -0.44    0.36 
  -8   2   1    1.75    0.48 
  -7   2   1   -0.21    0.21 
  -6   2   1    1.63    0.30 
  -5   2   1    7.17    0.59 
  -2   2   1  197.83    6.68 
  -1   2   1   13.20    0.34 
   0   2   1   15.36    0.32 
   1   2   1   33.16    0.63 
   2   2   1   84.10    1.29 
   3   2   1    0.25    0.09 
   4   2   1    0.28    0.11 
   5   2   1    1.57    0.20 
   6   2   1    3.07    0.40 
   7   2   1    3.98    0.48 
   8   2   1    7.91    0.69 
   9   2   1    0.54    0.50 
  -9   3   1    1.47    0.50 
  -8   3   1   -0.27    0.31 
  -7   3   1    3.74    0.45 
  -6   3   1   17.46    0.73 
  -5   3   1   17.54    0.77 
  -4   3   1   82.02    2.22 
  -3   3   1    0.02    0.12 
  -2   3   1  238.71    5.42 
  -1   3   1    1.28    0.13 
   0   3   1    6.34    0.20 
   1   3   1  409.87    5.87 
   2   3   1   10.66    0.29 
   3   3   1  118.76    1.87 
   4   3   1  208.15    3.17 
   5   3   1    0.11    0.13 
   6   3   1   14.43    0.78 
   7   3   1   11.60    0.75 
   8   3   1    6.23    0.64 
   9   3   1    3.56    0.68 
  -9   4   1    0.31    0.39 
  -8   4   1   -0.08    0.31 
  -7   4   1    2.05    0.36 
  -6   4   1    3.11    0.38 
  -5   4   1    9.27    0.47 
  -4   4   1    0.61    0.17 
  -3   4   1  123.00    2.49 
  -2   4   1    0.76    0.10 
  -1   4   1   75.84    1.84 
   0   4   1  468.19    8.60 
   1   4   1  282.06    4.03 
   2   4   1   16.22    0.38 
   3   4   1   62.83    1.06 
   4   4   1    0.79    0.13 
   5   4   1    1.61    0.24 
   6   4   1    3.36    0.35 
   7   4   1    0.39    0.28 
   8   4   1    4.10    0.70 
   9   4   1    0.14    0.47 
  -9   5   1    0.83    0.46 
  -8   5   1    0.08    0.30 
  -7   5   1    7.75    0.62 
  -6   5   1    2.88    0.38 
  -5   5   1   13.53    0.57 
  -4   5   1   51.73    1.26 
  -3   5   1   23.50    0.65 
  -2   5   1  131.51    2.19 
  -1   5   1  142.32    3.33 
   0   5   1  217.21    3.52 
   1   5   1  703.31    9.98 
   2   5   1  191.38    2.90 
   3   5   1   56.18    1.17 
   4   5   1   98.29    1.65 
   5   5   1    4.46    0.36 
   6   5   1   14.55    0.70 
   7   5   1    1.29    0.33 
   8   5   1    0.96    0.47 
   9   5   1    0.73    0.51 
  -9   6   1    0.95    0.75 
  -8   6   1    2.86    0.58 
  -7   6   1    3.12    0.55 
  -6   6   1    3.47    0.41 
  -5   6   1   22.79    0.76 
  -4   6   1   14.08    0.62 
  -3   6   1   99.31    1.82 
  -2   6   1   18.28    0.45 
  -1   6   1    3.72    0.25 
   0   6   1  182.23    2.98 
   1   6   1   37.99    0.67 
   2   6   1   36.86    0.68 
   3   6   1   48.84    1.03 
   4   6   1    7.97    0.44 
   5   6   1   23.40    0.83 
   6   6   1    7.25    0.50 
   7   6   1    0.24    0.36 
   8   6   1    4.39    0.70 
   9   6   1   -0.64    0.40 
  -9   7   1    2.20    0.57 
  -8   7   1    0.21    0.37 
  -7   7   1   13.72    1.02 
  -6   7   1    5.75    0.67 
  -5   7   1    2.21    0.30 
  -4   7   1   28.29    0.84 
  -3   7   1    5.57    0.29 
  -2   7   1   75.73    1.52 
  -1   7   1   50.40    1.13 
   0   7   1    0.02    0.07 
   1   7   1  102.67    1.84 
   2   7   1    9.09    0.29 
   3   7   1   22.12    0.69 
   4   7   1   22.61    0.77 
   5   7   1    0.36    0.19 
   6   7   1   17.42    0.75 
   7   7   1    0.66    0.34 
   8   7   1    0.37    0.43 
   9   7   1   -0.11    0.45 
  -9   8   1   -0.02    0.39 
  -8   8   1    3.59    0.54 
  -7   8   1    1.00    0.39 
  -6   8   1   18.44    1.13 
  -5   8   1   20.37    1.12 
  -4   8   1    5.42    0.44 
  -3   8   1  102.23    1.88 
  -2   8   1    0.93    0.18 
  -1   8   1   17.40    0.61 
   0   8   1   48.21    0.94 
   1   8   1    0.14    0.11 
   2   8   1  222.47    3.32 
   3   8   1   33.11    0.83 
   4   8   1    5.18    0.37 
   5   8   1   34.88    1.04 
   6   8   1   10.67    0.73 
   7   8   1    5.86    0.62 
   8   8   1    4.53    0.73 
   9   8   1    0.07    0.48 
  -8   9   1    0.14    0.38 
  -7   9   1    3.99    0.50 
  -6   9   1    4.27    0.48 
  -5   9   1    0.62    0.26 
  -4   9   1   15.50    0.73 
  -3   9   1   18.31    0.76 
  -2   9   1    4.03    0.33 
  -1   9   1   23.33    0.73 
   0   9   1   16.83    0.49 
   1   9   1   22.92    0.60 
   2   9   1    6.11    0.27 
   3   9   1    8.61    0.44 
   4   9   1   14.21    0.62 
   5   9   1    1.61    0.27 
   6   9   1    7.65    0.67 
   7   9   1    0.41    0.34 
   8   9   1   -0.45    0.36 
  -8  10   1    1.87    0.53 
  -7  10   1    2.30    0.50 
  -6  10   1   19.58    1.02 
  -5  10   1   45.79    1.44 
  -4  10   1   21.04    0.90 
  -3  10   1   58.59    1.48 
  -2  10   1   10.87    0.56 
  -1  10   1   97.75    2.14 
   0  10   1   98.63    1.80 
   1  10   1    0.29    0.12 
   2  10   1  119.99    1.92 
   3  10   1   94.90    1.85 
   4  10   1    2.41    0.29 
   5  10   1   43.59    1.48 
   6  10   1    2.45    0.45 
   7  10   1    3.61    0.54 
   8  10   1    1.73    0.58 
  -8  11   1    0.16    0.40 
  -7  11   1    0.40    0.36 
  -6  11   1    4.39    0.51 
  -5  11   1    1.03    0.30 
  -4  11   1    1.14    0.29 
  -3  11   1   16.80    0.76 
  -2  11   1    3.80    0.36 
  -1  11   1    1.60    0.24 
   0  11   1    4.70    0.28 
   1  11   1    7.01    0.37 
   2  11   1    1.59    0.17 
   3  11   1    4.32    0.34 
   4  11   1    0.43    0.20 
   5  11   1   -0.06    0.26 
   6  11   1    0.04    0.28 
   7  11   1    0.98    0.40 
   8  11   1    0.14    0.44 
  -8  12   1   11.22    1.09 
  -7  12   1    1.76    0.51 
  -6  12   1   10.49    0.95 
  -5  12   1    7.38    0.61 
  -4  12   1    1.11    0.29 
  -3  12   1   60.06    1.57 
  -2  12   1   45.78    1.25 
  -1  12   1   37.49    1.09 
   0  12   1  118.37    2.49 
   1  12   1    0.24    0.15 
   2  12   1   59.15    1.29 
   3  12   1   26.28    0.88 
   4  12   1    2.48    0.38 
   5  12   1   36.11    1.44 
   6  12   1    6.09    0.63 
   7  12   1    3.81    0.57 
   8  12   1    2.55    0.67 
  -8  13   1    1.57    0.57 
  -7  13   1    2.54    0.60 
  -6  13   1    0.39    0.38 
  -5  13   1    0.15    0.27 
  -4  13   1    9.43    0.65 
  -3  13   1    0.04    0.23 
  -2  13   1    1.10    0.27 
  -1  13   1    0.81    0.23 
   0  13   1    0.64    0.23 
   1  13   1   11.35    0.52 
   2  13   1    0.86    0.21 
   3  13   1    3.85    0.34 
   4  13   1    0.26    0.25 
   5  13   1    1.83    0.39 
   6  13   1    0.39    0.33 
   7  13   1    0.13    0.36 
   8  13   1    0.52    0.52 
  -7  14   1    3.24    0.65 
  -6  14   1    8.05    0.90 
  -5  14   1    5.72    0.70 
  -4  14   1    0.38    0.26 
  -3  14   1   26.63    1.10 
  -2  14   1   41.70    1.27 
  -1  14   1   37.43    1.16 
   0  14   1  128.22    2.81 
   1  14   1    0.02    0.21 
   2  14   1   16.83    0.68 
   3  14   1   46.73    1.17 
   4  14   1    0.15    0.26 
   5  14   1   19.09    1.04 
   6  14   1    1.99    0.44 
   7  14   1    0.41    0.40 
  -7  15   1   -0.12    0.42 
  -6  15   1    0.15    0.38 
  -5  15   1    7.96    0.87 
  -4  15   1    0.89    0.40 
  -3  15   1    4.58    0.47 
  -2  15   1    8.79    0.62 
  -1  15   1    7.51    0.56 
   0  15   1    7.29    0.54 
   1  15   1   27.99    1.10 
   2  15   1    0.89    0.28 
   3  15   1    0.11    0.25 
   4  15   1   19.33    0.99 
   5  15   1    0.21    0.32 
   6  15   1   -0.25    0.31 
   7  15   1    5.65    0.71 
  -7  16   1    0.25    0.49 
  -6  16   1    2.88    0.63 
  -5  16   1   11.12    1.02 
  -4  16   1    3.17    0.56 
  -3  16   1   24.60    1.24 
  -2  16   1   12.51    0.76 
  -1  16   1   22.29    0.99 
   0  16   1   29.95    1.18 
   1  16   1    6.90    0.54 
   2  16   1   22.12    0.99 
   3  16   1   38.26    1.82 
   4  16   1    0.63    0.31 
   5  16   1   13.75    0.92 
   6  16   1   -0.10    0.34 
   7  16   1    1.19    0.47 
  -6  17   1   -0.14    0.41 
  -5  17   1    0.75    0.44 
  -4  17   1    4.30    0.67 
  -3  17   1   -0.14    0.32 
  -2  17   1   11.45    0.75 
  -1  17   1   17.15    0.89 
   0  17   1    3.09    0.41 
   1  17   1    3.07    0.40 
   2  17   1    6.92    0.72 
   3  17   1    4.65    0.66 
   4  17   1   11.20    1.03 
   5  17   1    0.38    0.44 
   6  17   1    3.81    0.57 
  -6  18   1    0.51    0.52 
  -5  18   1    1.75    0.58 
  -4  18   1    0.20    0.40 
  -3  18   1   13.68    1.07 
  -2  18   1    7.02    0.78 
  -1  18   1    0.27    0.27 
   0  18   1    6.73    0.58 
   1  18   1   -0.17    0.24 
   2  18   1    4.15    0.63 
   3  18   1    1.32    0.47 
   4  18   1    4.63    0.70 
   5  18   1    8.53    0.95 
   6  18   1    1.09    0.51 
  -5  19   1    2.93    0.67 
  -4  19   1    3.49    0.66 
  -3  19   1   -0.28    0.36 
  -2  19   1   18.77    1.27 
  -1  19   1   25.98    1.47 
   0  19   1    0.32    0.28 
   1  19   1   16.62    1.19 
   2  19   1   17.75    1.23 
   3  19   1    0.13    0.36 
   4  19   1   10.87    1.04 
   5  19   1   -0.25    0.41 
  -5  20   1    1.97    0.64 
  -4  20   1    0.32    0.44 
  -3  20   1    5.13    0.73 
  -2  20   1    0.46    0.41 
  -1  20   1   -0.08    0.37 
   0  20   1    5.74    0.66 
   1  20   1    0.31    0.37 
   2  20   1    1.01    0.47 
   3  20   1   -0.12    0.38 
   4  20   1    1.79    0.54 
   5  20   1    0.50    0.50 
  -4  21   1    8.50    1.01 
  -3  21   1    0.66    0.51 
  -2  21   1    8.65    0.94 
  -1  21   1   14.37    1.12 
   0  21   1    1.15    0.73 
   1  21   1   15.43    1.29 
   2  21   1    6.62    0.82 
   3  21   1    2.61    0.63 
   4  21   1    8.81    0.99 
  -3  22   1    1.97    0.64 
  -2  22   1    0.16    0.46 
  -1  22   1   -0.30    0.40 
   0  22   1   -0.12    0.58 
   1  22   1    0.42    0.67 
   2  22   1    3.69    0.76 
   3  22   1    0.13    0.45 
  -2  23   1   11.47    1.09 
  -1  23   1    4.05    1.12 
   0  23   1   -0.26    0.63 
   1  23   1   15.98    1.92 
   2  23   1    1.43    0.82 
  -1 -23   2    0.62    0.47 
   0 -23   2    0.66    0.46 
   1 -23   2   -0.43    0.57 
  -3 -22   2    7.39    0.97 
  -2 -22   2    0.77    0.47 
  -1 -22   2    5.84    0.80 
   0 -22   2   10.82    1.07 
   1 -22   2   -0.31    0.57 
   2 -22   2   12.96    1.64 
   3 -22   2    3.77    0.71 
  -4 -21   2    1.53    0.90 
  -3 -21   2   -0.06    0.41 
  -2 -21   2    0.22    0.43 
  -1 -21   2    1.03    0.46 
   0 -21   2   -0.02    0.36 
   1 -21   2    4.05    0.68 
   2 -21   2   -0.24    0.37 
   3 -21   2   -0.46    0.36 
   4 -21   2    0.31    0.46 
  -5 -20   2   -0.38    0.43 
  -4 -20   2    2.32    0.92 
  -3 -20   2   10.08    1.02 
  -2 -20   2    2.28    0.57 
  -1 -20   2    9.90    0.97 
   0 -20   2   12.01    1.03 
   1 -20   2   -0.40    0.31 
   2 -20   2   10.44    1.00 
   3 -20   2    4.79    0.73 
   4 -20   2    3.11    0.66 
  -5 -19   2    0.03    0.46 
  -4 -19   2    1.11    0.49 
  -3 -19   2    0.32    0.38 
  -2 -19   2    4.72    0.71 
  -1 -19   2    8.84    0.88 
   0 -19   2    2.98    0.55 
   1 -19   2    3.13    0.45 
   2 -19   2    0.40    0.40 
   3 -19   2    9.75    0.96 
   4 -19   2    4.65    0.72 
   5 -19   2    0.35    0.37 
  -6 -18   2    0.77    0.57 
  -5 -18   2    0.87    0.50 
  -4 -18   2    3.31    0.51 
  -3 -18   2   14.41    1.02 
  -2 -18   2    0.18    0.35 
  -1 -18   2    2.93    0.53 
   0 -18   2    8.29    0.81 
   1 -18   2    1.17    0.33 
   2 -18   2   15.09    1.13 
   3 -18   2    0.49    0.36 
   4 -18   2    3.37    0.51 
   5 -18   2    6.39    0.67 
   6 -18   2   -0.62    0.34 
  -6 -17   2    0.20    0.47 
  -5 -17   2    3.83    0.69 
  -4 -17   2    9.57    0.75 
  -3 -17   2    0.18    0.27 
  -2 -17   2   15.78    1.13 
  -1 -17   2    4.29    0.59 
   0 -17   2    0.05    0.30 
   1 -17   2   34.85    1.33 
   2 -17   2    1.09    0.34 
   3 -17   2   12.93    0.84 
   4 -17   2    8.47    0.72 
   5 -17   2    0.91    0.38 
   6 -17   2    2.09    0.50 
  -7 -16   2   -0.17    0.46 
  -6 -16   2    1.76    0.56 
  -5 -16   2    1.24    0.49 
  -4 -16   2    0.57    0.32 
  -3 -16   2    7.18    0.60 
  -2 -16   2    1.75    0.34 
  -1 -16   2   19.88    1.21 
   0 -16   2   11.09    0.69 
   1 -16   2    0.60    0.25 
   2 -16   2   15.29    0.71 
   3 -16   2    9.62    0.70 
   4 -16   2    0.28    0.29 
   5 -16   2    5.42    0.60 
   6 -16   2    3.16    0.53 
  -7 -15   2    2.87    0.68 
  -6 -15   2   -0.28    0.38 
  -5 -15   2   15.87    1.26 
  -4 -15   2   13.84    0.87 
  -3 -15   2    0.47    0.27 
  -2 -15   2   30.01    1.20 
  -1 -15   2   12.14    0.90 
   0 -15   2    6.65    0.53 
   1 -15   2   37.15    1.26 
   2 -15   2    9.35    0.54 
   3 -15   2   10.33    0.70 
   4 -15   2    4.86    0.51 
   5 -15   2    1.90    0.40 
   6 -15   2    3.32    0.50 
   7 -15   2    1.75    0.61 
  -7 -14   2    1.06    0.56 
  -6 -14   2    0.78    0.47 
  -5 -14   2    1.78    0.52 
  -4 -14   2    0.18    0.25 
  -3 -14   2    2.22    0.37 
  -2 -14   2    2.60    0.38 
  -1 -14   2   23.34    0.80 
   0 -14   2   45.58    1.28 
   1 -14   2    7.64    0.55 
   2 -14   2   16.27    0.70 
   3 -14   2   27.50    1.16 
   4 -14   2   11.43    0.76 
   5 -14   2    0.41    0.29 
   6 -14   2    2.65    0.46 
   7 -14   2    0.25    0.47 
  -7 -13   2    3.55    0.70 
  -6 -13   2    0.35    0.41 
  -5 -13   2    1.14    0.45 
  -4 -13   2   23.86    1.09 
  -3 -13   2    1.43    0.33 
  -2 -13   2   35.39    1.20 
  -1 -13   2   52.58    1.19 
   0 -13   2   20.48    0.86 
   1 -13   2   25.52    0.84 
   2 -13   2    3.54    0.32 
   3 -13   2   38.98    1.36 
   4 -13   2   10.35    0.71 
   5 -13   2    0.06    0.25 
   6 -13   2   29.30    1.34 
   7 -13   2    3.64    0.72 
  -8 -12   2   -0.24    0.47 
  -7 -12   2    0.75    0.48 
  -6 -12   2    0.47    0.41 
  -5 -12   2   -0.26    0.22 
  -4 -12   2    1.88    0.35 
  -3 -12   2    2.71    0.38 
  -2 -12   2    1.79    0.30 
  -1 -12   2    0.19    0.15 
   0 -12   2    3.11    0.27 
   1 -12   2   -0.29    0.14 
   2 -12   2    1.55    0.24 
   3 -12   2   -0.18    0.22 
   4 -12   2    0.10    0.24 
   5 -12   2    5.69    0.53 
   6 -12   2    0.56    0.31 
   7 -12   2    1.17    0.49 
   8 -12   2    0.41    0.48 
  -8 -11   2    0.45    0.48 
  -7 -11   2    4.09    0.73 
  -6 -11   2    7.08    0.85 
  -5 -11   2   25.93    1.17 
  -4 -11   2   30.49    1.22 
  -3 -11   2    2.53    0.36 
  -2 -11   2  114.78    2.15 
  -1 -11   2   55.42    1.18 
   0 -11   2   34.10    0.81 
   1 -11   2  204.16    3.57 
   2 -11   2   12.67    0.54 
   3 -11   2   32.41    0.93 
   4 -11   2   81.33    2.02 
   5 -11   2    1.64    0.34 
   6 -11   2   23.10    1.09 
   7 -11   2    4.26    0.69 
   8 -11   2   -0.03    0.43 
  -8 -10   2    0.08    0.45 
  -7 -10   2   -0.14    0.38 
  -6 -10   2    0.41    0.39 
  -5 -10   2    8.06    0.63 
  -4 -10   2    1.33    0.31 
  -3 -10   2    0.83    0.25 
  -2 -10   2    0.03    0.13 
  -1 -10   2   24.07    0.68 
   0 -10   2   11.06    0.39 
   1 -10   2    5.67    0.26 
   2 -10   2   32.88    0.81 
   3 -10   2    4.22    0.32 
   4 -10   2    3.35    0.39 
   5 -10   2    1.18    0.29 
   6 -10   2    0.10    0.26 
   7 -10   2    0.93    0.45 
   8 -10   2   -0.29    0.41 
  -8  -9   2    1.40    0.55 
  -7  -9   2   15.06    1.18 
  -6  -9   2   12.11    1.05 
  -5  -9   2   32.63    1.26 
  -4  -9   2   57.74    1.56 
  -3  -9   2    0.70    0.22 
  -2  -9   2   88.92    1.68 
  -1  -9   2   48.97    1.04 
   0  -9   2   81.55    1.36 
   1  -9   2  514.54    7.39 
   2  -9   2   76.21    1.50 
   3  -9   2   29.36    0.80 
   4  -9   2  110.91    2.50 
   5  -9   2    1.28    0.31 
   6  -9   2   11.52    0.64 
   7  -9   2    1.18    0.38 
   8  -9   2    0.29    0.34 
  -9  -8   2    0.05    0.50 
  -8  -8   2    1.20    0.54 
  -7  -8   2   15.22    1.21 
  -6  -8   2    0.20    0.32 
  -5  -8   2    4.99    0.50 
  -4  -8   2    2.87    0.37 
  -3  -8   2    0.90    0.16 
  -2  -8   2    0.34    0.13 
  -1  -8   2    1.76    0.19 
   0  -8   2   26.64    0.64 
   1  -8   2   34.72    0.66 
   2  -8   2   41.47    0.89 
   3  -8   2    3.03    0.24 
   4  -8   2    7.87    0.52 
   5  -8   2   35.93    1.06 
   6  -8   2    2.94    0.43 
   7  -8   2    1.26    0.38 
   8  -8   2    0.04    0.32 
  -9  -7   2    3.31    0.74 
  -8  -7   2    0.23    0.43 
  -7  -7   2   13.54    1.13 
  -6  -7   2    5.12    0.68 
  -5  -7   2    2.47    0.36 
  -4  -7   2   34.10    1.15 
  -3  -7   2    0.15    0.12 
  -2  -7   2   56.94    1.31 
  -1  -7   2   69.37    1.51 
   0  -7   2   13.75    0.49 
   1  -7   2  103.98    1.85 
   2  -7   2    0.43    0.12 
   3  -7   2   91.77    1.70 
   4  -7   2   54.90    1.23 
   5  -7   2    1.70    0.27 
   6  -7   2   19.10    0.98 
   7  -7   2    2.01    0.42 
   8  -7   2    0.81    0.37 
   9  -7   2    4.72    0.83 
  -9  -6   2    0.83    0.54 
  -8  -6   2    1.09    0.47 
  -7  -6   2   -0.14    0.34 
  -6  -6   2   18.67    1.20 
  -5  -6   2   14.35    0.78 
  -4  -6   2   31.99    1.33 
  -3  -6   2   59.21    1.39 
  -2  -6   2   13.58    0.51 
  -1  -6   2   26.08    0.70 
   0  -6   2  313.63    5.15 
   1  -6   2    0.08    0.09 
   2  -6   2   88.43    1.61 
   3  -6   2   12.91    0.41 
   4  -6   2    3.66    0.30 
   5  -6   2   33.81    0.99 
   6  -6   2    0.37    0.27 
   7  -6   2    4.57    0.53 
   8  -6   2    1.41    0.39 
   9  -6   2    0.11    0.48 
  -9  -5   2   -0.05    0.43 
  -8  -5   2   -0.08    0.34 
  -7  -5   2    2.59    0.55 
  -6  -5   2    4.44    0.47 
  -5  -5   2   11.45    0.67 
  -4  -5   2   34.51    0.85 
  -3  -5   2    4.07    0.30 
  -2  -5   2  131.19    2.60 
  -1  -5   2   19.49    0.49 
   0  -5   2    2.10    0.16 
   1  -5   2    5.00    0.24 
   2  -5   2   88.52    1.43 
   3  -5   2   48.64    0.89 
   4  -5   2    7.67    0.42 
   5  -5   2   12.80    0.57 
   6  -5   2    3.20    0.41 
   7  -5   2    3.43    0.45 
   8  -5   2    0.00    0.28 
   9  -5   2    0.94    0.55 
  -9  -4   2    0.73    0.47 
  -8  -4   2    3.54    0.51 
  -7  -4   2    0.78    0.40 
  -6  -4   2   47.56    1.43 
  -5  -4   2   40.67    1.21 
  -4  -4   2   37.00    1.04 
  -3  -4   2   79.25    1.76 
  -2  -4   2   43.78    1.01 
  -1  -4   2   96.89    1.99 
   0  -4   2  173.46    2.86 
   1  -4   2   15.85    0.36 
   2  -4   2  110.42    1.68 
   3  -4   2  103.77    1.88 
   4  -4   2   29.11    0.81 
   5  -4   2   27.20    0.82 
   6  -4   2    0.26    0.26 
   7  -4   2    8.64    0.66 
   8  -4   2    7.55    0.85 
   9  -4   2    0.88    0.51 
  -9  -3   2   -0.33    0.37 
  -8  -3   2    2.19    0.42 
  -7  -3   2   -0.02    0.30 
  -6  -3   2   19.43    0.94 
  -5  -3   2    0.35    0.17 
  -4  -3   2   19.05    0.74 
  -3  -3   2    0.70    0.17 
  -2  -3   2  173.78    2.86 
  -1  -3   2   27.21    0.63 
   0  -3   2    3.79    0.19 
   1  -3   2    1.04    0.10 
   2  -3   2    9.78    0.36 
   3  -3   2    5.46    0.30 
   4  -3   2    1.45    0.19 
   5  -3   2    0.26    0.16 
   6  -3   2    1.78    0.34 
   7  -3   2    4.56    0.49 
   8  -3   2    0.05    0.37 
   9  -3   2   -0.04    0.43 
  -9  -2   2    0.80    0.48 
  -8  -2   2    8.83    0.90 
  -7  -2   2    0.14    0.31 
  -6  -2   2   11.81    0.71 
  -5  -2   2   14.87    0.61 
  -4  -2   2    0.01    0.14 
  -3  -2   2  275.21    5.38 
  -2  -2   2    1.50    0.13 
  -1  -2   2   83.84    1.47 
   0  -2   2  143.63    2.37 
   1  -2   2   -0.01    0.06 
   2  -2   2  210.15    3.45 
   3  -2   2   78.49    1.45 
   4  -2   2   72.10    1.27 
   5  -2   2   60.33    1.33 
   6  -2   2    4.07    0.38 
   7  -2   2   10.86    0.62 
   8  -2   2    4.65    0.70 
   9  -2   2    0.36    0.47 
  -9  -1   2   -0.08    0.40 
  -8  -1   2    1.33    0.48 
  -7  -1   2    0.19    0.31 
  -6  -1   2   -0.01    0.21 
  -5  -1   2    0.49    0.20 
  -4  -1   2   15.00    0.66 
  -3  -1   2   33.48    1.11 
  -2  -1   2  111.27    2.13 
  -1  -1   2    8.34    0.31 
   0  -1   2    3.39    0.15 
   1  -1   2   15.36    0.37 
   2  -1   2   30.32    0.62 
   3  -1   2    2.48    0.17 
   4  -1   2    4.82    0.26 
   5  -1   2    1.41    0.23 
   6  -1   2    0.28    0.20 
   7  -1   2    5.42    0.56 
   8  -1   2    0.19    0.32 
   9  -1   2    0.20    0.37 
  -9   0   2   -0.27    0.56 
  -8   0   2    4.27    0.64 
  -7   0   2    0.76    0.35 
  -6   0   2    3.74    0.36 
  -5   0   2    1.26    0.25 
  -4   0   2    0.21    0.18 
  -3   0   2  215.65    4.16 
  -2   0   2  123.26    2.44 
  -1   0   2  986.18   17.97 
   0   0   2   61.27    1.06 
   1   0   2    3.22    0.17 
   2   0   2  273.40    3.96 
   3   0   2  103.83    1.64 
   4   0   2   23.44    0.56 
   5   0   2   58.93    1.30 
   6   0   2    3.42    0.36 
   7   0   2    1.95    0.40 
   8   0   2   13.55    0.91 
   9   0   2    5.61    0.67 
  -9   1   2   -0.02    0.39 
  -8   1   2    1.92    0.50 
  -7   1   2    0.02    0.24 
  -6   1   2   -0.01    0.18 
  -5   1   2    0.36    0.22 
  -4   1   2   15.85    1.12 
  -3   1   2   38.36    1.13 
  -2   1   2  103.69    2.11 
  -1   1   2    9.20    0.29 
   0   1   2    3.29    0.16 
   1   1   2   14.85    0.32 
   2   1   2   28.51    0.64 
   3   1   2    2.29    0.20 
   4   1   2    5.85    0.34 
   5   1   2    0.98    0.20 
   6   1   2    0.16    0.26 
   7   1   2    6.77    0.61 
   8   1   2    0.20    0.31 
   9   1   2   -0.30    0.31 
  -9   2   2    0.14    0.52 
  -8   2   2    7.72    0.83 
  -7   2   2   -0.03    0.17 
  -6   2   2   10.95    0.68 
  -3   2   2  284.26    6.52 
  -2   2   2    1.39    0.16 
  -1   2   2   86.27    1.69 
   0   2   2  144.19    2.35 
   1   2   2   -0.01    0.08 
   2   2   2  208.71    3.46 
   3   2   2   78.27    1.47 
   4   2   2   71.37    1.42 
   5   2   2   58.73    1.29 
   6   2   2    3.44    0.43 
   7   2   2   12.67    0.81 
   8   2   2    5.19    0.60 
   9   2   2    0.11    0.39 
  -8   3   2    1.50    0.36 
  -7   3   2    0.22    0.17 
  -6   3   2   18.71    1.07 
  -5   3   2    0.15    0.33 
  -4   3   2   16.37    0.83 
  -3   3   2    0.09    0.15 
  -2   3   2  169.28    2.86 
  -1   3   2   28.01    0.68 
   0   3   2    3.58    0.17 
   1   3   2    1.55    0.14 
   2   3   2   10.30    0.34 
   3   3   2    6.70    0.31 
   4   3   2    2.47    0.22 
   5   3   2    0.12    0.15 
   6   3   2    1.57    0.33 
   7   3   2    4.85    0.52 
   8   3   2   -0.28    0.27 
   9   3   2   -0.47    0.41 
  -8   4   2    3.92    0.48 
  -7   4   2    1.12    0.31 
  -6   4   2   45.78    1.31 
  -5   4   2   40.92    1.16 
  -4   4   2   41.73    1.07 
  -3   4   2   82.06    1.74 
  -2   4   2   42.22    0.96 
  -1   4   2   99.65    1.69 
   0   4   2  173.61    2.85 
   1   4   2   16.72    0.43 
   2   4   2  105.37    1.90 
   3   4   2  101.31    1.86 
   4   4   2   28.38    0.74 
   5   4   2   25.59    1.03 
   6   4   2   -0.05    0.23 
   7   4   2    8.77    0.68 
   8   4   2    6.14    0.64 
   9   4   2    0.12    0.46 
  -8   5   2    0.22    0.34 
  -7   5   2    2.16    0.36 
  -6   5   2    4.18    0.37 
  -5   5   2   10.30    0.51 
  -4   5   2   33.37    0.94 
  -3   5   2    3.27    0.27 
  -2   5   2  126.22    2.55 
  -1   5   2   20.53    0.53 
   0   5   2    1.91    0.15 
   1   5   2    4.76    0.25 
   2   5   2   90.51    1.61 
   3   5   2   49.64    1.01 
   4   5   2   11.37    0.44 
   5   5   2   10.79    0.65 
   6   5   2    3.91    0.45 
   7   5   2    3.80    0.48 
   8   5   2   -0.03    0.38 
   9   5   2    1.57    0.57 
  -8   6   2    0.67    0.39 
  -7   6   2    0.43    0.26 
  -6   6   2   19.14    0.90 
  -5   6   2   14.23    0.60 
  -4   6   2   36.31    0.84 
  -3   6   2   61.78    1.40 
  -2   6   2   13.94    0.51 
  -1   6   2   27.12    0.67 
   0   6   2  319.48    5.16 
   1   6   2    0.10    0.09 
   2   6   2   87.56    1.62 
   3   6   2   11.21    0.40 
   4   6   2    3.19    0.35 
   5   6   2   29.83    1.14 
   6   6   2    0.17    0.23 
   7   6   2    4.88    0.53 
   8   6   2    1.63    0.54 
   9   6   2   -0.36    0.42 
  -9   7   2    1.92    0.75 
  -8   7   2    0.40    0.35 
  -7   7   2   14.32    1.04 
  -6   7   2    5.50    0.50 
  -5   7   2    2.17    0.31 
  -4   7   2   34.16    0.83 
  -3   7   2    0.56    0.12 
  -2   7   2   56.26    1.28 
  -1   7   2   68.71    1.48 
   0   7   2   12.40    0.41 
   1   7   2  102.72    1.84 
   2   7   2    0.79    0.13 
   3   7   2   91.07    1.69 
   4   7   2   55.57    1.44 
   5   7   2    1.45    0.32 
   6   7   2   19.59    0.95 
   7   7   2    2.42    0.43 
   8   7   2    1.31    0.53 
   9   7   2    4.72    0.79 
  -9   8   2    0.95    0.55 
  -8   8   2    1.26    0.45 
  -7   8   2   10.94    0.96 
  -6   8   2    0.43    0.24 
  -5   8   2    4.99    0.46 
  -4   8   2    3.54    0.35 
  -3   8   2    1.07    0.21 
  -2   8   2    0.28    0.14 
  -1   8   2    2.35    0.23 
   0   8   2   27.87    0.65 
   1   8   2   34.10    0.77 
   2   8   2   38.58    0.87 
   3   8   2    2.66    0.20 
   4   8   2    9.24    0.50 
   5   8   2   35.54    1.23 
   6   8   2    1.89    0.36 
   7   8   2    2.52    0.56 
   8   8   2   -0.35    0.37 
  -8   9   2    1.30    0.47 
  -7   9   2   14.83    1.11 
  -6   9   2   13.22    0.99 
  -5   9   2   29.04    1.13 
  -4   9   2   56.85    1.48 
  -3   9   2    0.97    0.22 
  -2   9   2   87.64    1.93 
  -1   9   2   50.07    1.19 
   0   9   2   81.13    1.55 
   1   9   2  516.78    8.29 
   2   9   2   78.37    1.33 
   3   9   2   28.39    0.85 
   4   9   2  110.06    2.16 
   5   9   2    1.34    0.31 
   6   9   2   12.57    0.77 
   7   9   2    0.63    0.43 
   8   9   2    1.08    0.51 
  -8  10   2    0.70    0.41 
  -7  10   2    0.05    0.33 
  -6  10   2   -0.15    0.30 
  -5  10   2    8.20    0.77 
  -4  10   2    0.65    0.25 
  -3  10   2    0.30    0.20 
  -2  10   2   -0.06    0.15 
  -1  10   2   26.12    0.82 
   0  10   2    9.60    0.50 
   1  10   2    5.06    0.32 
   2  10   2   32.96    0.71 
   3  10   2    3.17    0.30 
   4  10   2    2.66    0.31 
   5  10   2    1.34    0.27 
   6  10   2    0.04    0.34 
   7  10   2    1.82    0.54 
   8  10   2    0.08    0.43 
  -8  11   2    0.80    0.46 
  -7  11   2    4.22    0.67 
  -6  11   2    6.91    0.77 
  -5  11   2   26.40    1.43 
  -4  11   2   31.87    1.21 
  -3  11   2    2.56    0.33 
  -2  11   2  115.81    2.49 
  -1  11   2   56.79    1.38 
   0  11   2   34.01    0.96 
   1  11   2  206.79    3.57 
   2  11   2   14.05    0.48 
   3  11   2   33.14    0.97 
   4  11   2   80.10    1.73 
   5  11   2    1.50    0.29 
   6  11   2   19.95    1.34 
   7  11   2    4.30    0.72 
   8  11   2    0.29    0.50 
  -8  12   2   -0.02    0.43 
  -7  12   2    1.54    0.50 
  -6  12   2    0.30    0.35 
  -5  12   2    0.08    0.32 
  -4  12   2    1.39    0.39 
  -3  12   2    3.05    0.36 
  -2  12   2    1.72    0.29 
  -1  12   2    0.11    0.19 
   0  12   2    2.82    0.32 
   1  12   2    0.09    0.15 
   2  12   2    2.82    0.28 
   3  12   2    0.50    0.20 
   4  12   2    0.05    0.19 
   5  12   2    6.45    0.60 
   6  12   2    0.34    0.38 
   7  12   2    1.88    0.54 
   8  12   2    1.50    0.59 
  -7  13   2    4.30    0.73 
  -6  13   2   -0.16    0.35 
  -5  13   2    0.35    0.36 
  -4  13   2   26.94    1.42 
  -3  13   2    1.31    0.40 
  -2  13   2   34.45    1.14 
  -1  13   2   54.47    1.41 
   0  13   2   18.97    0.83 
   1  13   2   25.46    0.79 
   2  13   2    3.19    0.31 
   3  13   2   35.97    1.04 
   4  13   2   10.73    0.60 
   5  13   2    0.49    0.31 
   6  13   2   31.10    1.75 
   7  13   2    3.51    0.68 
  -7  14   2    0.85    0.51 
  -6  14   2    0.68    0.44 
  -5  14   2    1.85    0.49 
  -4  14   2    0.33    0.33 
  -3  14   2    2.15    0.46 
  -2  14   2    2.75    0.42 
  -1  14   2   22.96    0.95 
   0  14   2   45.40    1.27 
   1  14   2    7.60    0.45 
   2  14   2   18.74    0.87 
   3  14   2   27.50    0.96 
   4  14   2   10.99    0.74 
   5  14   2    0.20    0.30 
   6  14   2    2.83    0.61 
   7  14   2    0.85    0.50 
  -7  15   2    2.44    0.63 
  -6  15   2    0.08    0.39 
  -5  15   2   16.40    1.23 
  -4  15   2   12.64    1.02 
  -3  15   2    0.22    0.32 
  -2  15   2   34.36    1.59 
  -1  15   2   12.01    0.69 
   0  15   2    5.63    0.48 
   1  15   2   39.27    1.25 
   2  15   2    9.49    0.63 
   3  15   2   11.01    0.69 
   4  15   2    5.09    0.55 
   5  15   2    1.39    0.50 
   6  15   2    2.81    0.61 
   7  15   2    1.02    0.55 
  -7  16   2   -0.30    0.43 
  -6  16   2    1.26    0.50 
  -5  16   2    1.20    0.52 
  -4  16   2    0.75    0.40 
  -3  16   2    6.99    0.73 
  -2  16   2    1.88    0.43 
  -1  16   2   18.46    1.14 
   0  16   2   12.90    0.75 
   1  16   2    0.87    0.28 
   2  16   2   15.08    0.82 
   3  16   2   10.17    0.91 
   4  16   2    0.17    0.36 
   5  16   2    5.94    0.79 
   6  16   2    1.45    0.56 
  -6  17   2    0.42    0.46 
  -5  17   2    4.48    0.70 
  -4  17   2    7.71    0.84 
  -3  17   2    0.13    0.34 
  -2  17   2   19.77    1.25 
  -1  17   2    4.87    0.64 
   0  17   2    0.63    0.35 
   1  17   2   36.58    1.36 
   2  17   2    1.09    0.31 
   3  17   2   13.63    1.06 
   4  17   2    8.07    0.87 
   5  17   2    0.71    0.47 
   6  17   2    1.19    0.52 
  -6  18   2    2.24    0.65 
  -5  18   2    0.80    0.50 
  -4  18   2    2.14    0.56 
  -3  18   2   16.50    1.22 
  -2  18   2    0.43    0.40 
  -1  18   2    2.52    0.52 
   0  18   2    9.00    0.85 
   1  18   2    1.45    0.35 
   2  18   2   13.76    0.90 
   3  18   2    0.71    0.41 
   4  18   2    3.08    0.60 
   5  18   2    7.08    0.90 
   6  18   2    0.43    0.49 
  -5  19   2    0.58    0.49 
  -4  19   2    1.86    0.59 
  -3  19   2    0.03    0.42 
  -2  19   2    5.03    0.70 
  -1  19   2    8.58    0.89 
   0  19   2    2.43    0.55 
   1  19   2    3.58    0.60 
   2  19   2   -0.45    0.29 
   3  19   2    9.28    0.94 
   4  19   2    2.73    0.61 
   5  19   2    0.16    0.45 
  -5  20   2    0.88    0.54 
  -4  20   2    1.54    0.60 
  -3  20   2    9.97    1.00 
  -2  20   2    1.43    0.52 
  -1  20   2    9.81    0.95 
   0  20   2   17.37    1.20 
   1  20   2    0.03    0.45 
   2  20   2   10.32    1.45 
   3  20   2    4.64    0.73 
   4  20   2    2.21    0.61 
  -4  21   2    2.12    0.64 
  -3  21   2    0.44    0.48 
  -2  21   2    0.86    0.50 
  -1  21   2    0.51    0.43 
   0  21   2    0.80    0.42 
   1  21   2    2.36    0.85 
   2  21   2   -0.57    0.57 
   3  21   2    0.27    0.66 
   4  21   2    1.16    0.58 
  -3  22   2    9.36    1.06 
  -2  22   2    0.20    0.47 
  -1  22   2    4.61    0.77 
   0  22   2   10.73    1.55 
   1  22   2   -0.38    0.57 
   2  22   2   10.59    1.54 
   3  22   2    2.32    0.94 
  -1  23   2    0.41    0.51 
   0  23   2    0.51    0.66 
   1  23   2    0.73    0.74 
   0 -23   3    0.89    0.70 
  -2 -22   3    0.09    0.46 
  -1 -22   3    0.78    0.47 
   0 -22   3    0.22    0.43 
   1 -22   3   -0.49    0.59 
   2 -22   3    0.12    0.69 
  -3 -21   3    0.36    0.47 
  -2 -21   3   13.91    1.22 
  -1 -21   3    3.03    0.63 
   0 -21   3    6.21    0.80 
   1 -21   3   15.33    1.73 
   2 -21   3    0.56    0.45 
   3 -21   3    8.33    0.95 
  -4 -20   3    0.41    0.48 
  -3 -20   3    3.49    0.67 
  -2 -20   3    2.62    0.59 
  -1 -20   3    2.90    0.59 
   0 -20   3    1.11    0.44 
   1 -20   3   -0.03    0.50 
   2 -20   3    0.65    0.43 
   3 -20   3   -0.26    0.39 
   4 -20   3    0.41    0.38 
  -5 -19   3    3.67    0.75 
  -4 -19   3    6.04    0.77 
  -3 -19   3    3.11    0.62 
  -2 -19   3    8.67    0.94 
  -1 -19   3    1.13    0.47 
   0 -19   3   10.99    0.97 
   1 -19   3   25.28    1.50 
   2 -19   3   -0.07    0.33 
   3 -19   3   21.87    1.47 
   4 -19   3    3.85    0.56 
   5 -19   3   -0.67    0.30 
  -5 -18   3    0.15    0.43 
  -4 -18   3    2.43    0.47 
  -3 -18   3    7.55    0.87 
  -2 -18   3    4.00    0.65 
  -1 -18   3    5.24    0.69 
   0 -18   3    6.81    0.75 
   1 -18   3    0.10    0.27 
   2 -18   3    4.44    0.65 
   3 -18   3   -0.05    0.28 
   4 -18   3    7.49    0.70 
   5 -18   3    3.52    0.55 
  -6 -17   3    0.18    0.44 
  -5 -17   3    1.87    0.55 
  -4 -17   3    2.60    0.46 
  -3 -17   3    8.14    0.69 
  -2 -17   3    8.58    0.88 
  -1 -17   3   -0.36    0.28 
   0 -17   3    2.01    0.38 
   1 -17   3   14.66    0.85 
   2 -17   3    2.17    0.39 
   3 -17   3   18.37    1.00 
   4 -17   3    7.08    0.67 
   5 -17   3    0.77    0.37 
   6 -17   3    3.89    0.59 
  -6 -16   3    6.05    0.88 
  -5 -16   3    3.60    0.67 
  -4 -16   3    5.18    0.58 
  -3 -16   3   27.01    1.25 
  -2 -16   3    1.53    0.46 
  -1 -16   3    6.40    0.73 
   0 -16   3   43.24    1.38 
   1 -16   3    2.98    0.41 
   2 -16   3   42.24    1.52 
   3 -16   3    5.40    0.56 
   4 -16   3   14.46    0.91 
   5 -16   3    3.16    0.49 
   6 -16   3    0.28    0.35 
  -7 -15   3    0.06    0.47 
  -6 -15   3   -0.04    0.40 
  -5 -15   3    0.51    0.35 
  -4 -15   3    1.79    0.42 
  -3 -15   3    0.91    0.32 
  -2 -15   3   27.77    1.19 
  -1 -15   3    1.43    0.42 
   0 -15   3    5.04    0.48 
   1 -15   3    9.80    0.55 
   2 -15   3   11.25    0.71 
   3 -15   3    0.46    0.29 
   4 -15   3    0.20    0.29 
   5 -15   3    1.49    0.39 
   6 -15   3    1.00    0.38 
   7 -15   3    0.24    0.46 
  -7 -14   3    0.41    0.51 
  -6 -14   3    3.18    0.68 
  -5 -14   3    8.07    0.71 
  -4 -14   3    7.66    0.66 
  -3 -14   3   35.66    1.40 
  -2 -14   3    0.37    0.26 
  -1 -14   3   61.40    1.40 
   0 -14   3   14.62    0.78 
   1 -14   3    9.64    0.53 
   2 -14   3  120.14    2.74 
   3 -14   3    3.70    0.44 
   4 -14   3   15.08    0.87 
   5 -14   3   28.74    1.30 
   6 -14   3    0.57    0.32 
   7 -14   3   10.55    1.07 
  -7 -13   3    0.14    0.45 
  -6 -13   3    0.01    0.38 
  -5 -13   3    0.79    0.33 
  -4 -13   3   -0.01    0.25 
  -3 -13   3    0.60    0.28 
  -2 -13   3    3.20    0.40 
  -1 -13   3    3.18    0.32 
   0 -13   3    4.10    0.41 
   1 -13   3    8.98    0.49 
   2 -13   3    8.73    0.48 
   3 -13   3    6.09    0.53 
   4 -13   3    1.38    0.35 
   5 -13   3   -0.05    0.26 
   6 -13   3    0.15    0.30 
   7 -13   3    0.34    0.47 
  -8 -12   3    1.23    0.58 
  -7 -12   3   -0.25    0.40 
  -6 -12   3    0.95    0.48 
  -5 -12   3   11.82    0.82 
  -4 -12   3   12.41    0.80 
  -3 -12   3   53.92    1.54 
  -2 -12   3   -0.27    0.20 
  -1 -12   3   64.97    1.41 
   0 -12   3   39.13    0.82 
   1 -12   3   12.85    0.56 
   2 -12   3   85.87    1.73 
   3 -12   3    9.00    0.62 
   4 -12   3   16.06    0.85 
   5 -12   3   52.40    1.64 
   6 -12   3    1.00    0.47 
   7 -12   3    4.24    0.73 
  -8 -11   3    2.22    0.67 
  -7 -11   3    0.69    0.49 
  -6 -11   3    0.56    0.41 
  -5 -11   3    0.68    0.32 
  -4 -11   3    8.84    0.65 
  -3 -11   3    0.59    0.27 
  -2 -11   3    4.48    0.35 
  -1 -11   3   -0.21    0.14 
   0 -11   3    0.28    0.13 
   1 -11   3    5.70    0.36 
   2 -11   3    0.37    0.17 
   3 -11   3    7.32    0.54 
   4 -11   3    1.86    0.33 
   5 -11   3   -0.07    0.24 
   6 -11   3    0.68    0.40 
   7 -11   3    0.26    0.42 
   8 -11   3    0.29    0.45 
  -8 -10   3    0.80    0.49 
  -7 -10   3   -0.16    0.36 
  -6 -10   3   27.23    1.66 
  -5 -10   3    1.92    0.39 
  -4 -10   3   10.19    0.69 
  -3 -10   3   68.42    1.78 
  -2 -10   3   -0.01    0.15 
  -1 -10   3   75.91    1.77 
   0 -10   3  122.37    2.20 
   1 -10   3    3.93    0.29 
   2 -10   3   64.65    1.35 
   3 -10   3   64.20    1.65 
   4 -10   3    4.47    0.45 
   5 -10   3    0.35    0.25 
   6 -10   3    0.29    0.35 
   7 -10   3    4.82    0.74 
   8 -10   3    1.51    0.55 
  -8  -9   3    0.06    0.43 
  -7  -9   3    0.04    0.36 
  -6  -9   3    0.99    0.45 
  -5  -9   3    0.38    0.27 
  -4  -9   3    4.07    0.43 
  -3  -9   3    6.16    0.50 
  -2  -9   3   27.91    0.95 
  -1  -9   3    0.96    0.21 
   0  -9   3    2.72    0.23 
   1  -9   3    8.61    0.41 
   2  -9   3    4.28    0.29 
   3  -9   3   13.31    0.68 
   4  -9   3    0.09    0.21 
   5  -9   3    4.99    0.47 
   6  -9   3    1.92    0.41 
   7  -9   3    0.81    0.36 
   8  -9   3    4.12    0.58 
  -8  -8   3    4.90    0.78 
  -7  -8   3   -0.20    0.35 
  -6  -8   3    8.56    0.69 
  -5  -8   3    2.01    0.37 
  -4  -8   3   11.05    0.69 
  -3  -8   3    7.44    0.47 
  -2  -8   3    1.66    0.23 
  -1  -8   3  105.02    1.89 
   0  -8   3  112.83    2.02 
   1  -8   3   11.94    0.47 
   2  -8   3   38.02    0.87 
   3  -8   3   12.99    0.66 
   4  -8   3   11.20    0.55 
   5  -8   3   23.48    0.88 
   6  -8   3    0.37    0.29 
   7  -8   3    5.96    0.64 
   8  -8   3    5.83    0.67 
  -9  -7   3    0.34    0.65 
  -8  -7   3    0.36    0.41 
  -7  -7   3    0.43    0.39 
  -6  -7   3    0.03    0.27 
  -5  -7   3    1.33    0.32 
  -4  -7   3   23.59    1.25 
  -3  -7   3   11.85    0.59 
  -2  -7   3   25.01    0.84 
  -1  -7   3   53.88    1.06 
   0  -7   3   37.41    0.82 
   1  -7   3   55.76    1.10 
   2  -7   3    3.66    0.24 
   3  -7   3   48.04    1.07 
   4  -7   3   24.89    0.78 
   5  -7   3   -0.30    0.17 
   6  -7   3    4.51    0.52 
   7  -7   3    1.37    0.37 
   8  -7   3    1.32    0.40 
  -9  -6   3    0.45    0.47 
  -8  -6   3    1.45    0.49 
  -7  -6   3    0.21    0.37 
  -6  -6   3   13.69    0.83 
  -5  -6   3    2.10    0.36 
  -4  -6   3   13.99    0.66 
  -3  -6   3   32.48    0.96 
  -2  -6   3    1.95    0.24 
  -1  -6   3  116.64    2.03 
   0  -6   3   27.26    0.65 
   1  -6   3   53.64    1.06 
   2  -6   3  117.05    1.86 
   3  -6   3    6.01    0.36 
   4  -6   3   46.16    1.07 
   5  -6   3   61.34    1.38 
   6  -6   3    2.35    0.39 
   7  -6   3    5.40    0.58 
   8  -6   3    3.13    0.52 
   9  -6   3   -0.20    0.53 
  -9  -5   3    1.67    0.90 
  -8  -5   3    0.13    0.42 
  -7  -5   3   11.56    1.03 
  -6  -5   3    4.76    0.52 
  -5  -5   3   14.50    0.99 
  -4  -5   3   11.41    0.59 
  -3  -5   3   23.21    0.80 
  -2  -5   3   79.66    1.80 
  -1  -5   3   17.72    0.49 
   0  -5   3   81.50    1.50 
   1  -5   3  313.75    5.12 
   2  -5   3   21.01    0.48 
   3  -5   3   54.08    1.15 
   4  -5   3   46.50    1.04 
   5  -5   3   -0.17    0.22 
   6  -5   3    3.48    0.44 
   7  -5   3    3.76    0.50 
   8  -5   3    1.70    0.41 
   9  -5   3    0.71    0.54 
  -9  -4   3   -0.30    0.43 
  -8  -4   3    0.09    0.37 
  -7  -4   3    5.38    0.73 
  -6  -4   3   11.88    0.76 
  -5  -4   3    9.94    0.80 
  -4  -4   3   54.59    1.37 
  -3  -4   3   56.92    1.12 
  -2  -4   3   25.11    0.82 
  -1  -4   3   52.09    0.99 
   0  -4   3   29.84    0.65 
   1  -4   3   21.15    0.45 
   2  -4   3  124.37    2.19 
   3  -4   3   15.40    0.55 
   4  -4   3    0.45    0.16 
   5  -4   3   41.44    1.29 
   6  -4   3    1.13    0.30 
   7  -4   3    2.38    0.41 
   8  -4   3   -0.09    0.40 
   9  -4   3   -0.35    0.42 
  -9  -3   3    1.87    0.61 
  -8  -3   3    1.21    0.49 
  -7  -3   3   24.41    1.47 
  -6  -3   3   16.74    0.89 
  -5  -3   3   14.59    0.72 
  -4  -3   3   10.36    0.44 
  -3  -3   3    6.06    0.30 
  -2  -3   3   43.98    0.90 
  -1  -3   3   27.57    0.61 
   0  -3   3   69.09    1.26 
   1  -3   3  169.78    2.51 
   2  -3   3    0.17    0.10 
   3  -3   3  145.94    2.53 
   4  -3   3   43.82    0.98 
   5  -3   3   12.35    0.71 
   6  -3   3   49.16    1.48 
   7  -3   3    2.27    0.40 
   8  -3   3   -0.18    0.37 
   9  -3   3    3.70    0.76 
  -9  -2   3    2.38    0.61 
  -8  -2   3   -0.17    0.33 
  -7  -2   3    0.37    0.32 
  -6  -2   3    8.19    0.77 
  -5  -2   3    6.51    0.50 
  -4  -2   3   18.73    0.62 
  -3  -2   3   31.10    0.71 
  -2  -2   3    0.11    0.10 
  -1  -2   3   12.61    0.43 
   0  -2   3   47.03    0.89 
   1  -2   3   32.93    0.69 
   2  -2   3    8.23    0.33 
   3  -2   3    0.78    0.14 
   4  -2   3    8.31    0.39 
   5  -2   3   11.59    0.67 
   6  -2   3    0.03    0.23 
   7  -2   3   11.55    0.77 
   8  -2   3    0.65    0.44 
   9  -2   3    0.11    0.48 
  -9  -1   3    0.51    0.44 
  -8  -1   3    1.99    0.52 
  -7  -1   3    4.67    0.50 
  -6  -1   3   15.23    0.81 
  -5  -1   3   79.60    1.64 
  -4  -1   3   75.46    1.50 
  -3  -1   3   37.83    0.95 
  -2  -1   3  363.68    6.83 
  -1  -1   3   79.42    1.66 
   0  -1   3  204.52    3.37 
   1  -1   3  112.35    1.95 
   2  -1   3    7.36    0.31 
   3  -1   3   52.43    1.06 
   4  -1   3   80.58    1.38 
   5  -1   3    4.65    0.38 
   6  -1   3   56.77    1.37 
   7  -1   3    0.78    0.33 
   8  -1   3    8.78    0.92 
   9  -1   3    0.74    0.52 
  -9   0   3    0.32    0.41 
  -8   0   3    0.25    0.35 
  -7   0   3   -0.02    0.24 
  -6   0   3    0.13    0.23 
  -5   0   3    0.02    0.15 
  -4   0   3   -0.11    0.14 
  -3   0   3    0.03    0.12 
  -2   0   3    0.11    0.08 
  -1   0   3   -0.02    0.11 
   0   0   3    0.00    0.08 
   1   0   3    0.05    0.09 
   2   0   3    0.02    0.08 
   3   0   3    0.08    0.08 
   4   0   3    0.09    0.14 
   5   0   3    0.25    0.19 
   6   0   3    0.08    0.20 
   7   0   3   -0.23    0.24 
   8   0   3    0.05    0.32 
   9   0   3   -0.30    0.41 
  -8   1   3    2.62    0.43 
  -7   1   3    4.09    0.49 
  -6   1   3   14.83    0.67 
  -5   1   3   82.52    1.91 
  -4   1   3   75.37    1.74 
  -3   1   3   38.21    0.82 
  -2   1   3  364.81    5.90 
  -1   1   3   79.47    1.41 
   0   1   3  207.92    3.38 
   1   1   3  114.35    1.95 
   2   1   3    6.91    0.25 
   3   1   3   53.06    1.11 
   4   1   3   77.92    1.58 
   5   1   3    5.21    0.39 
   6   1   3   57.16    1.62 
   7   1   3    0.67    0.31 
   8   1   3    9.92    0.81 
   9   1   3    1.43    0.46 
  -8   2   3    0.81    0.39 
  -7   2   3   -0.11    0.19 
  -6   2   3    6.81    0.45 
  -5   2   3    8.28    0.45 
  -4   2   3   22.96    0.80 
  -3   2   3   29.19    0.79 
  -2   2   3    0.06    0.10 
  -1   2   3   11.65    0.41 
   0   2   3   46.79    1.04 
   1   2   3   33.14    0.61 
   2   2   3    6.48    0.24 
   3   2   3    1.59    0.19 
   4   2   3    7.71    0.41 
   5   2   3   13.20    0.59 
   6   2   3    0.62    0.28 
   7   2   3   11.21    0.79 
   8   2   3    1.07    0.37 
   9   2   3    0.16    0.38 
  -7   3   3   24.23    0.82 
  -6   3   3   15.04    0.78 
  -5   3   3   16.88    0.77 
  -4   3   3   11.75    0.57 
  -3   3   3    5.75    0.36 
  -2   3   3   45.76    1.05 
  -1   3   3   27.94    0.71 
   0   3   3   67.80    1.45 
   1   3   3  167.14    2.82 
   2   3   3    0.18    0.08 
   3   3   3  142.66    2.54 
   4   3   3   42.36    0.99 
   5   3   3   12.54    0.56 
   6   3   3   48.70    1.58 
   7   3   3    1.33    0.35 
   8   3   3   -0.35    0.29 
   9   3   3    5.47    0.66 
  -7   4   3    5.27    0.45 
  -6   4   3   11.53    0.59 
  -5   4   3   11.01    0.53 
  -4   4   3   51.67    1.14 
  -3   4   3   56.02    1.14 
  -2   4   3   26.66    0.58 
  -1   4   3   50.16    1.40 
   0   4   3   30.85    0.70 
   1   4   3   20.69    0.52 
   2   4   3  124.53    2.18 
   3   4   3   16.69    0.55 
   4   4   3    0.49    0.16 
   5   4   3   45.83    1.31 
   6   4   3    1.41    0.33 
   7   4   3    2.14    0.40 
   8   4   3    0.30    0.32 
   9   4   3    0.03    0.47 
  -8   5   3   -0.37    0.41 
  -7   5   3   12.19    0.78 
  -6   5   3    3.76    0.42 
  -5   5   3   13.62    0.60 
  -4   5   3   10.45    0.48 
  -3   5   3   20.69    0.60 
  -2   5   3   82.93    1.49 
  -1   5   3   18.42    0.62 
   0   5   3   83.83    1.48 
   1   5   3  313.20    5.12 
   2   5   3   22.35    0.60 
   3   5   3   55.12    1.14 
   4   5   3   42.17    1.00 
   5   5   3    0.11    0.24 
   6   5   3    2.59    0.40 
   7   5   3    3.51    0.49 
   8   5   3    1.72    0.41 
   9   5   3    0.69    0.54 
  -8   6   3    1.95    0.49 
  -7   6   3    0.12    0.25 
  -6   6   3   13.94    0.80 
  -5   6   3    2.18    0.33 
  -4   6   3   13.32    0.62 
  -3   6   3   31.30    0.79 
  -2   6   3    2.48    0.19 
  -1   6   3  113.06    2.01 
   0   6   3   28.82    0.64 
   1   6   3   52.93    1.06 
   2   6   3  117.76    2.10 
   3   6   3    7.74    0.38 
   4   6   3   45.23    1.27 
   5   6   3   61.61    1.65 
   6   6   3    1.90    0.35 
   7   6   3    5.70    0.58 
   8   6   3    3.87    0.54 
   9   6   3    0.72    0.58 
  -8   7   3    0.15    0.35 
  -7   7   3    0.86    0.31 
  -6   7   3   -0.19    0.24 
  -5   7   3    1.84    0.40 
  -4   7   3   23.00    0.81 
  -3   7   3   12.32    0.54 
  -2   7   3   25.87    0.65 
  -1   7   3   53.46    1.05 
   0   7   3   37.22    0.80 
   1   7   3   53.41    1.10 
   2   7   3    3.06    0.24 
   3   7   3   45.76    1.02 
   4   7   3   19.74    0.90 
   5   7   3    0.12    0.23 
   6   7   3    4.02    0.47 
   7   7   3    0.19    0.30 
   8   7   3    1.12    0.53 
  -8   8   3    3.76    0.65 
  -7   8   3    0.23    0.34 
  -6   8   3    8.15    0.76 
  -5   8   3    1.66    0.40 
  -4   8   3   12.21    0.82 
  -3   8   3    7.14    0.42 
  -2   8   3    2.08    0.20 
  -1   8   3  102.92    1.89 
   0   8   3  113.08    2.02 
   1   8   3   10.57    0.44 
   2   8   3   39.03    0.89 
   3   8   3   13.39    0.52 
   4   8   3    9.20    0.61 
   5   8   3   22.58    1.01 
   6   8   3    0.18    0.26 
   7   8   3    5.94    0.60 
   8   8   3    6.30    0.87 
  -8   9   3   -0.62    0.30 
  -7   9   3    0.49    0.36 
  -6   9   3    0.57    0.35 
  -5   9   3    0.76    0.34 
  -4   9   3    5.15    0.58 
  -3   9   3    7.58    0.60 
  -2   9   3   29.27    0.78 
  -1   9   3    0.59    0.14 
   0   9   3    2.03    0.21 
   1   9   3    8.02    0.40 
   2   9   3    4.73    0.31 
   3   9   3   13.27    0.69 
   4   9   3   -0.11    0.21 
   5   9   3    6.67    0.54 
   6   9   3    0.91    0.32 
   7   9   3    0.34    0.40 
   8   9   3    4.87    0.78 
  -8  10   3    1.23    0.45 
  -7  10   3    0.35    0.38 
  -6  10   3   29.06    1.54 
  -5  10   3    1.12    0.38 
  -4  10   3   10.28    0.79 
  -3  10   3   68.87    2.12 
  -2  10   3   -0.13    0.21 
  -1  10   3   77.24    1.50 
   0  10   3  122.81    2.21 
   1  10   3    4.75    0.32 
   2  10   3   66.34    1.36 
   3  10   3   65.15    1.65 
   4  10   3    4.39    0.45 
   5  10   3    0.53    0.26 
   6  10   3   -0.19    0.25 
   7  10   3    4.77    0.72 
   8  10   3    1.93    0.63 
  -8  11   3    2.40    0.60 
  -7  11   3    0.69    0.42 
  -6  11   3    0.23    0.35 
  -5  11   3    0.85    0.35 
  -4  11   3    8.95    0.76 
  -3  11   3    0.87    0.33 
  -2  11   3    3.71    0.48 
  -1  11   3    0.04    0.15 
   0  11   3    0.20    0.15 
   1  11   3    6.09    0.37 
   2  11   3    0.50    0.18 
   3  11   3    7.37    0.55 
   4  11   3    2.22    0.35 
   5  11   3   -0.10    0.23 
   6  11   3    0.13    0.30 
   7  11   3    1.37    0.51 
   8  11   3    1.34    0.59 
  -8  12   3    1.70    0.79 
  -7  12   3   -0.12    0.39 
  -6  12   3    2.34    0.52 
  -5  12   3   10.50    0.91 
  -4  12   3   12.53    0.93 
  -3  12   3   52.75    1.84 
  -2  12   3    0.06    0.26 
  -1  12   3   68.19    1.68 
   0  12   3   39.63    0.97 
   1  12   3   12.73    0.57 
   2  12   3   85.07    2.05 
   3  12   3    7.45    0.57 
   4  12   3   17.60    0.89 
   5  12   3   47.54    1.58 
   6  12   3    0.67    0.41 
   7  12   3    5.61    0.83 
  -7  13   3   -0.01    0.38 
  -6  13   3   -0.03    0.36 
  -5  13   3    0.65    0.38 
  -4  13   3   -0.03    0.30 
  -3  13   3    0.33    0.33 
  -2  13   3    2.59    0.48 
  -1  13   3    2.64    0.36 
   0  13   3    3.53    0.32 
   1  13   3   10.47    0.53 
   2  13   3   10.76    0.66 
   3  13   3    6.36    0.54 
   4  13   3    2.57    0.39 
   5  13   3    0.03    0.25 
   6  13   3    0.16    0.39 
   7  13   3    0.15    0.43 
  -7  14   3    0.48    0.46 
  -6  14   3    3.18    0.58 
  -5  14   3    7.84    0.83 
  -4  14   3    8.11    0.80 
  -3  14   3   36.55    1.69 
  -2  14   3    0.04    0.29 
  -1  14   3   64.76    1.69 
   0  14   3   14.09    0.74 
   1  14   3    9.17    0.51 
   2  14   3  120.04    2.73 
   3  14   3    4.10    0.47 
   4  14   3   15.13    0.86 
   5  14   3   26.40    1.55 
   6  14   3    0.65    0.47 
   7  14   3   10.52    1.13 
  -7  15   3   -0.11    0.46 
  -6  15   3   -0.31    0.36 
  -5  15   3    0.97    0.44 
  -4  15   3    1.12    0.42 
  -3  15   3    0.90    0.39 
  -2  15   3   28.41    1.48 
  -1  15   3    1.09    0.32 
   0  15   3    5.43    0.50 
   1  15   3    9.32    0.80 
   2  15   3   11.21    0.72 
   3  15   3   -0.17    0.23 
   4  15   3    0.33    0.28 
   5  15   3    1.99    0.53 
   6  15   3    1.79    0.55 
   7  15   3   -0.70    0.39 
  -6  16   3    9.41    1.00 
  -5  16   3    3.65    0.64 
  -4  16   3    6.43    0.79 
  -3  16   3   25.46    1.45 
  -2  16   3    1.84    0.46 
  -1  16   3    7.44    0.61 
   0  16   3   47.23    1.49 
   1  16   3    2.32    0.47 
   2  16   3   41.32    1.50 
   3  16   3    6.71    0.60 
   4  16   3   14.20    1.14 
   5  16   3    2.41    0.56 
   6  16   3   -0.16    0.43 
  -6  17   3   -0.36    0.41 
  -5  17   3    0.61    0.46 
  -4  17   3    3.68    0.63 
  -3  17   3    8.40    0.86 
  -2  17   3    7.74    0.83 
  -1  17   3    0.15    0.26 
   0  17   3    1.54    0.44 
   1  17   3   17.94    1.17 
   2  17   3    2.45    0.52 
   3  17   3   19.62    1.02 
   4  17   3    7.69    0.90 
   5  17   3    1.28    0.51 
   6  17   3    5.61    0.82 
  -5  18   3    0.89    0.52 
  -4  18   3    2.10    0.60 
  -3  18   3    7.04    0.83 
  -2  18   3    3.59    0.50 
  -1  18   3    5.98    0.58 
   0  18   3    6.77    0.77 
   1  18   3    0.03    0.34 
   2  18   3    7.18    0.80 
   3  18   3    0.36    0.57 
   4  18   3    7.45    0.87 
   5  18   3    4.36    0.74 
  -5  19   3    4.18    0.73 
  -4  19   3    7.18    0.88 
  -3  19   3    5.06    0.76 
  -2  19   3    7.86    0.71 
  -1  19   3    1.71    0.41 
   0  19   3   11.17    0.98 
   1  19   3   24.69    1.47 
   2  19   3    0.15    0.39 
   3  19   3   27.27    2.36 
   4  19   3    3.96    1.04 
   5  19   3   -0.64    0.38 
  -4  20   3    0.08    0.45 
  -3  20   3    3.74    0.70 
  -2  20   3    2.30    0.47 
  -1  20   3    2.47    0.59 
   0  20   3    0.43    0.40 
   1  20   3    0.21    0.39 
   2  20   3    0.04    0.55 
   3  20   3    0.21    0.64 
   4  20   3    1.20    0.78 
  -3  21   3   -0.29    0.36 
  -2  21   3   15.88    1.03 
  -1  21   3    2.66    0.62 
   0  21   3    6.43    0.83 
   1  21   3   17.32    1.27 
   2  21   3    0.13    0.62 
   3  21   3    7.29    1.32 
  -2  22   3    0.82    0.53 
  -1  22   3    0.96    0.55 
   0  22   3   -0.02    0.41 
   1  22   3    0.48    0.74 
   2  22   3    0.22    0.71 
   0  23   3    0.99    0.60 
  -1 -22   4    6.53    0.89 
   0 -22   4    3.20    0.96 
   1 -22   4    4.71    1.09 
  -3 -21   4    0.09    0.47 
  -2 -21   4    0.41    0.46 
  -1 -21   4    0.26    0.46 
   0 -21   4    0.81    0.71 
   1 -21   4    0.44    0.64 
   2 -21   4   -0.15    0.40 
   3 -21   4    1.37    0.56 
  -4 -20   4    3.14    0.69 
  -3 -20   4    7.95    0.97 
  -2 -20   4    0.46    0.44 
  -1 -20   4   18.51    1.37 
   0 -20   4    7.61    1.32 
   1 -20   4    3.40    0.95 
   2 -20   4   16.04    1.27 
   3 -20   4    1.17    0.53 
   4 -20   4    0.78    0.50 
  -4 -19   4    4.21    0.76 
  -3 -19   4    1.22    0.51 
  -2 -19   4    3.50    0.64 
  -1 -19   4    0.26    0.38 
   0 -19   4    2.76    0.57 
   1 -19   4    3.08    0.63 
   2 -19   4    4.38    0.70 
   3 -19   4    8.93    0.97 
   4 -19   4    1.81    0.56 
  -5 -18   4    0.30    0.44 
  -4 -18   4    9.52    0.85 
  -3 -18   4    4.12    0.69 
  -2 -18   4    0.13    0.40 
  -1 -18   4   15.99    1.22 
   0 -18   4    7.64    0.80 
   1 -18   4    7.21    0.83 
   2 -18   4   22.48    1.43 
   3 -18   4    6.51    0.82 
   4 -18   4    4.04    0.56 
   5 -18   4    6.18    0.69 
  -6 -17   4    0.56    0.55 
  -5 -17   4    3.73    0.57 
  -4 -17   4    1.54    0.44 
  -3 -17   4    0.25    0.38 
  -2 -17   4    4.90    0.65 
  -1 -17   4    5.78    0.71 
   0 -17   4   13.80    0.84 
   1 -17   4   11.41    0.98 
   2 -17   4    3.28    0.57 
   3 -17   4   16.59    0.98 
   4 -17   4    3.36    0.51 
   5 -17   4    2.97    0.51 
  -6 -16   4    0.62    0.51 
  -5 -16   4   -0.05    0.34 
  -4 -16   4    0.44    0.34 
  -3 -16   4    5.89    0.61 
  -2 -16   4    3.75    0.62 
  -1 -16   4    9.93    0.91 
   0 -16   4    2.35    0.40 
   1 -16   4    2.00    0.47 
   2 -16   4    8.53    0.87 
   3 -16   4    0.97    0.35 
   4 -16   4    7.52    0.68 
   5 -16   4    5.15    0.62 
   6 -16   4   -0.27    0.43 
  -6 -15   4    0.76    0.54 
  -5 -15   4   14.91    1.00 
  -4 -15   4    9.84    0.80 
  -3 -15   4    7.39    0.67 
  -2 -15   4   37.18    1.45 
  -1 -15   4    9.65    0.86 
   0 -15   4   22.67    1.03 
   1 -15   4   38.59    1.47 
   2 -15   4    0.59    0.28 
   3 -15   4   19.87    1.03 
   4 -15   4    7.08    0.66 
   5 -15   4    0.90    0.36 
   6 -15   4    6.02    0.84 
  -7 -14   4   -0.10    0.47 
  -6 -14   4   -0.17    0.44 
  -5 -14   4    0.47    0.35 
  -4 -14   4    0.87    0.35 
  -3 -14   4    2.13    0.41 
  -2 -14   4    3.38    0.44 
  -1 -14   4   10.11    0.68 
   0 -14   4    0.17    0.24 
   1 -14   4    0.55    0.27 
   2 -14   4   -0.10    0.23 
   3 -14   4    1.86    0.37 
   4 -14   4    0.92    0.33 
   5 -14   4    0.49    0.33 
   6 -14   4    0.49    0.47 
   7 -14   4    0.72    0.53 
  -7 -13   4    0.93    0.58 
  -6 -13   4    0.25    0.44 
  -5 -13   4   12.57    0.86 
  -4 -13   4    6.14    0.61 
  -3 -13   4    7.45    0.63 
  -2 -13   4   78.65    2.01 
  -1 -13   4    0.23    0.20 
   0 -13   4   46.90    1.33 
   1 -13   4   37.97    1.03 
   2 -13   4    0.41    0.24 
   3 -13   4   20.46    0.98 
   4 -13   4   33.50    1.35 
   5 -13   4   11.88    0.82 
   6 -13   4   10.09    1.00 
   7 -13   4    0.21    0.50 
  -7 -12   4    0.03    0.45 
  -6 -12   4   -0.52    0.28 
  -5 -12   4    0.92    0.37 
  -4 -12   4    0.07    0.27 
  -3 -12   4    2.33    0.39 
  -2 -12   4    3.47    0.42 
  -1 -12   4    0.62    0.24 
   0 -12   4    1.22    0.28 
   1 -12   4    0.21    0.18 
   2 -12   4    1.33    0.30 
   3 -12   4    1.72    0.33 
   4 -12   4    0.55    0.28 
   5 -12   4    1.65    0.37 
   6 -12   4    0.11    0.39 
   7 -12   4    0.13    0.42 
  -8 -11   4    0.49    0.49 
  -7 -11   4    4.68    0.78 
  -6 -11   4    1.07    0.38 
  -5 -11   4    7.48    0.67 
  -4 -11   4   10.10    0.72 
  -3 -11   4   21.03    1.01 
  -2 -11   4   68.31    1.72 
  -1 -11   4    0.81    0.25 
   0 -11   4   56.73    1.29 
   1 -11   4   41.17    0.99 
   2 -11   4    1.38    0.29 
   3 -11   4   83.98    2.06 
   4 -11   4    7.13    0.58 
   5 -11   4   10.28    0.72 
   6 -11   4   13.32    1.12 
   7 -11   4   -0.51    0.35 
  -8 -10   4    0.60    0.52 
  -7 -10   4    1.15    0.49 
  -6 -10   4    1.06    0.38 
  -5 -10   4    4.71    0.55 
  -4 -10   4    0.91    0.32 
  -3 -10   4    8.90    0.81 
  -2 -10   4    0.36    0.21 
  -1 -10   4    0.12    0.19 
   0 -10   4    0.36    0.17 
   1 -10   4    1.08    0.21 
   2 -10   4    0.13    0.20 
   3 -10   4    4.14    0.42 
   4 -10   4   15.86    0.82 
   5 -10   4    2.86    0.41 
   6 -10   4    1.36    0.47 
   7 -10   4    1.78    0.54 
   8 -10   4   -0.03    0.44 
  -8  -9   4    0.94    0.53 
  -7  -9   4    3.35    0.69 
  -6  -9   4    0.70    0.32 
  -5  -9   4   11.07    0.76 
  -4  -9   4    1.38    0.44 
  -3  -9   4    8.40    0.57 
  -2  -9   4   90.71    2.08 
  -1  -9   4    0.71    0.23 
   0  -9   4   55.66    1.16 
   1  -9   4   76.87    1.54 
   2  -9   4    0.00    0.19 
   3  -9   4   66.28    1.68 
   4  -9   4    1.09    0.28 
   5  -9   4   11.90    0.65 
   6  -9   4   11.40    0.81 
   7  -9   4   -0.20    0.31 
   8  -9   4    4.45    0.62 
  -8  -8   4    2.50    0.62 
  -7  -8   4    0.52    0.41 
  -6  -8   4    1.96    0.43 
  -5  -8   4    1.37    0.45 
  -4  -8   4    0.87    0.37 
  -3  -8   4    6.39    0.46 
  -2  -8   4    1.52    0.28 
  -1  -8   4   36.55    0.85 
   0  -8   4    3.54    0.27 
   1  -8   4    0.04    0.13 
   2  -8   4   36.42    0.85 
   3  -8   4    0.02    0.19 
   4  -8   4   31.99    0.98 
   5  -8   4    8.29    0.65 
   6  -8   4    0.30    0.28 
   7  -8   4    1.05    0.40 
   8  -8   4    1.49    0.46 
  -8  -7   4    2.41    0.62 
  -7  -7   4    4.19    0.69 
  -6  -7   4   -0.06    0.27 
  -5  -7   4    7.39    0.77 
  -4  -7   4    6.26    0.68 
  -3  -7   4    6.14    0.47 
  -2  -7   4   48.62    1.28 
  -1  -7   4   12.69    0.45 
   0  -7   4  108.07    1.97 
   1  -7   4   68.49    1.36 
   2  -7   4   12.70    0.45 
   3  -7   4   64.03    1.38 
   4  -7   4   13.42    0.62 
   5  -7   4    4.50    0.49 
   6  -7   4   23.79    1.15 
   7  -7   4    3.50    0.52 
   8  -7   4    2.28    0.49 
  -8  -6   4    1.03    0.48 
  -7  -6   4    8.13    0.93 
  -6  -6   4    0.81    0.32 
  -5  -6   4    5.97    0.68 
  -4  -6   4   27.22    1.10 
  -3  -6   4   59.78    1.52 
  -2  -6   4   -0.02    0.16 
  -1  -6   4  149.32    2.62 
   0  -6   4   20.77    0.64 
   1  -6   4    6.53    0.34 
   2  -6   4   37.15    0.74 
   3  -6   4   13.74    0.58 
   4  -6   4    3.13    0.31 
   5  -6   4    0.32    0.25 
   6  -6   4    1.78    0.38 
   7  -6   4    2.12    0.43 
   8  -6   4    0.62    0.38 
  -8  -5   4    0.38    0.46 
  -7  -5   4    1.55    0.39 
  -6  -5   4    2.31    0.51 
  -5  -5   4   52.47    1.94 
  -4  -5   4   20.16    0.89 
  -3  -5   4   16.32    0.74 
  -2  -5   4   27.84    0.68 
  -1  -5   4   27.15    0.68 
   0  -5   4   22.45    0.61 
   1  -5   4  168.84    2.87 
   2  -5   4    6.30    0.27 
   3  -5   4   44.98    1.03 
   4  -5   4   32.91    0.95 
   5  -5   4    1.78    0.34 
   6  -5   4    2.61    0.41 
   7  -5   4    0.54    0.31 
   8  -5   4    1.75    0.56 
  -9  -4   4    0.66    0.49 
  -8  -4   4    2.25    0.56 
  -7  -4   4    0.03    0.27 
  -6  -4   4    7.33    0.77 
  -5  -4   4    7.50    0.75 
  -4  -4   4   10.68    0.63 
  -3  -4   4   34.78    1.11 
  -2  -4   4   47.78    1.00 
  -1  -4   4  126.93    2.23 
   0  -4   4   99.11    1.83 
   1  -4   4    8.29    0.32 
   2  -4   4   74.26    1.23 
   3  -4   4    0.88    0.18 
   4  -4   4   37.87    0.97 
   5  -4   4    2.22    0.36 
   6  -4   4    1.35    0.33 
   7  -4   4   18.07    1.01 
   8  -4   4    1.54    0.56 
  -9  -3   4   -0.30    0.40 
  -8  -3   4    0.06    0.37 
  -7  -3   4   -0.47    0.23 
  -6  -3   4    8.03    0.79 
  -5  -3   4   28.23    1.12 
  -4  -3   4    0.21    0.21 
  -3  -3   4   20.59    0.61 
  -2  -3   4    0.29    0.11 
  -1  -3   4    1.90    0.21 
   0  -3   4   33.86    0.86 
   1  -3   4   22.06    0.52 
   2  -3   4    9.81    0.32 
   3  -3   4    1.06    0.18 
   4  -3   4   17.32    0.61 
   5  -3   4    2.06    0.35 
   6  -3   4   13.80    0.83 
   7  -3   4    0.15    0.29 
   8  -3   4    0.61    0.47 
  -9  -2   4    2.46    0.68 
  -8  -2   4    1.01    0.48 
  -7  -2   4    0.30    0.35 
  -6  -2   4   29.04    1.53 
  -5  -2   4   21.09    0.96 
  -4  -2   4   44.31    1.07 
  -3  -2   4   10.57    0.49 
  -2  -2   4    0.52    0.15 
  -1  -2   4   99.90    2.09 
   0  -2   4  141.69    2.41 
   1  -2   4  128.55    2.22 
   2  -2   4  162.81    2.76 
   3  -2   4    3.12    0.24 
   4  -2   4   72.57    1.75 
   5  -2   4   91.39    2.14 
   6  -2   4    0.26    0.25 
   7  -2   4   13.93    1.10 
   8  -2   4    4.35    0.71 
   9  -2   4    1.06    0.62 
  -9  -1   4   -0.22    0.53 
  -8  -1   4   -0.25    0.33 
  -7  -1   4    1.70    0.45 
  -6  -1   4    3.26    0.42 
  -5  -1   4    7.94    0.59 
  -4  -1   4    0.01    0.17 
  -3  -1   4   10.57    0.36 
  -2  -1   4    2.76    0.25 
  -1  -1   4   10.87    0.48 
   0  -1   4   24.54    0.56 
   1  -1   4   14.54    0.49 
   2  -1   4    1.16    0.16 
   3  -1   4    7.32    0.35 
   4  -1   4    2.54    0.32 
   5  -1   4    0.26    0.24 
   6  -1   4   28.90    1.22 
   7  -1   4    0.76    0.43 
   8  -1   4    0.22    0.41 
   9  -1   4   -0.02    0.49 
  -9   0   4    1.35    0.64 
  -8   0   4    0.24    0.38 
  -7   0   4    3.11    0.57 
  -6   0   4   41.28    1.39 
  -5   0   4   51.13    1.37 
  -4   0   4   81.73    1.59 
  -3   0   4  184.34    3.15 
  -2   0   4   62.62    1.45 
  -1   0   4   87.35    1.85 
   0   0   4   56.14    1.07 
   1   0   4  157.76    2.71 
   2   0   4  415.53    6.73 
   3   0   4   49.16    1.02 
   4   0   4   18.89    0.80 
   5   0   4  127.22    2.45 
   6   0   4    3.57    0.38 
   7   0   4   24.66    1.21 
   8   0   4   -0.04    0.39 
   9   0   4   -0.49    0.43 
  -8   1   4    0.24    0.35 
  -7   1   4    2.44    0.51 
  -6   1   4    2.91    0.49 
  -5   1   4   10.41    0.60 
  -4   1   4    0.59    0.16 
  -3   1   4    7.78    0.36 
  -2   1   4    4.43    0.23 
  -1   1   4   10.73    0.35 
   0   1   4   23.77    0.57 
   1   1   4   14.95    0.50 
   2   1   4    0.64    0.13 
   3   1   4    6.96    0.26 
   4   1   4    1.76    0.24 
   5   1   4    0.12    0.20 
   6   1   4   32.03    1.34 
   7   1   4   -0.01    0.28 
   8   1   4   -0.30    0.29 
   9   1   4    0.01    0.46 
  -8   2   4    1.17    0.44 
  -7   2   4    0.47    0.29 
  -6   2   4   31.26    1.24 
  -5   2   4   20.89    0.91 
  -4   2   4   45.13    1.02 
  -3   2   4   10.86    0.44 
  -2   2   4    0.73    0.13 
  -1   2   4  101.58    1.80 
   0   2   4  142.12    2.44 
   1   2   4  127.71    2.23 
   2   2   4  157.64    2.44 
   3   2   4    2.56    0.25 
   4   2   4   68.89    1.48 
   5   2   4   86.98    1.82 
   6   2   4    1.09    0.31 
   7   2   4   13.99    0.89 
   8   2   4    3.49    0.55 
   9   2   4    0.78    0.44 
  -8   3   4    0.30    0.38 
  -7   3   4    0.05    0.31 
  -6   3   4   10.92    0.69 
  -5   3   4   25.69    1.04 
  -4   3   4    0.22    0.17 
  -3   3   4   18.19    0.65 
  -2   3   4    0.58    0.14 
  -1   3   4    1.54    0.19 
   0   3   4   32.08    0.73 
   1   3   4   23.17    0.52 
   2   3   4    9.83    0.35 
   3   3   4    1.33    0.19 
   4   3   4   20.58    0.72 
   5   3   4    2.23    0.29 
   6   3   4   13.01    0.81 
   7   3   4    0.16    0.31 
   8   3   4    0.06    0.34 
  -8   4   4    1.37    0.48 
  -7   4   4    0.73    0.38 
  -6   4   4    7.57    0.58 
  -5   4   4    8.56    0.55 
  -4   4   4   12.36    0.60 
  -3   4   4   35.04    0.78 
  -2   4   4   47.81    1.16 
  -1   4   4  126.04    2.56 
   0   4   4  103.78    2.13 
   1   4   4    7.74    0.35 
   2   4   4   71.58    1.24 
   3   4   4    0.79    0.17 
   4   4   4   36.78    0.96 
   5   4   4    1.82    0.35 
   6   4   4    1.51    0.34 
   7   4   4   16.95    1.20 
   8   4   4    0.75    0.39 
  -8   5   4    0.14    0.37 
  -7   5   4    2.25    0.40 
  -6   5   4    2.24    0.44 
  -5   5   4   57.97    1.50 
  -4   5   4   21.24    0.87 
  -3   5   4   13.31    0.63 
  -2   5   4   28.76    0.89 
  -1   5   4   27.96    0.82 
   0   5   4   21.43    0.55 
   1   5   4  167.02    2.86 
   2   5   4    5.58    0.33 
   3   5   4   44.44    1.02 
   4   5   4   34.35    0.93 
   5   5   4    1.95    0.34 
   6   5   4    2.23    0.39 
   7   5   4    0.53    0.32 
   8   5   4    1.04    0.41 
  -8   6   4    0.66    0.41 
  -7   6   4    8.66    0.85 
  -6   6   4    1.11    0.38 
  -5   6   4    7.09    0.53 
  -4   6   4   32.30    1.07 
  -3   6   4   59.59    1.47 
  -2   6   4    0.28    0.16 
  -1   6   4  150.33    3.05 
   0   6   4   20.79    0.56 
   1   6   4    6.77    0.34 
   2   6   4   37.39    0.87 
   3   6   4   12.73    0.54 
   4   6   4    3.31    0.40 
   5   6   4    0.07    0.24 
   6   6   4    2.00    0.37 
   7   6   4    2.61    0.45 
   8   6   4    0.29    0.34 
  -8   7   4    2.35    0.85 
  -7   7   4    5.23    0.67 
  -6   7   4   -0.27    0.26 
  -5   7   4    8.41    0.59 
  -4   7   4    6.85    0.50 
  -3   7   4    5.41    0.43 
  -2   7   4   48.14    1.25 
  -1   7   4   13.20    0.60 
   0   7   4  107.12    1.93 
   1   7   4   69.64    1.36 
   2   7   4   12.84    0.52 
   3   7   4   65.39    1.36 
   4   7   4   13.50    0.75 
   5   7   4    4.63    0.47 
   6   7   4   24.49    1.15 
   7   7   4    3.66    0.50 
   8   7   4    2.76    0.52 
  -8   8   4    1.84    0.53 
  -7   8   4    1.02    0.41 
  -6   8   4    2.24    0.48 
  -5   8   4    0.97    0.30 
  -4   8   4    1.69    0.32 
  -3   8   4    6.51    0.56 
  -2   8   4    1.72    0.27 
  -1   8   4   37.98    1.05 
   0   8   4    2.73    0.22 
   1   8   4    0.21    0.13 
   2   8   4   36.10    0.90 
   3   8   4    0.13    0.16 
   4   8   4   31.82    1.22 
   5   8   4    7.96    0.62 
   6   8   4    0.16    0.28 
   7   8   4    1.31    0.39 
   8   8   4    1.01    0.53 
  -8   9   4    1.07    0.46 
  -7   9   4    3.59    0.65 
  -6   9   4    0.53    0.35 
  -5   9   4   10.03    0.69 
  -4   9   4    2.13    0.35 
  -3   9   4    9.40    0.59 
  -2   9   4   87.97    2.06 
  -1   9   4    0.62    0.22 
   0   9   4   53.80    1.15 
   1   9   4   77.64    1.54 
   2   9   4    0.42    0.17 
   3   9   4   66.53    1.69 
   4   9   4    2.27    0.36 
   5   9   4   11.74    0.75 
   6   9   4   14.07    0.88 
   7   9   4    0.40    0.33 
   8   9   4    5.76    0.85 
  -8  10   4    0.73    0.47 
  -7  10   4    0.49    0.41 
  -6  10   4    0.69    0.38 
  -5  10   4    3.48    0.44 
  -4  10   4    0.12    0.23 
  -3  10   4    9.28    0.61 
  -2  10   4    0.49    0.24 
  -1  10   4    0.39    0.22 
   0  10   4   -0.05    0.18 
   1  10   4    1.27    0.21 
   2  10   4    0.20    0.16 
   3  10   4    2.82    0.38 
   4  10   4   13.13    0.76 
   5  10   4    2.36    0.39 
   6  10   4    1.20    0.35 
   7  10   4    1.98    0.43 
   8  10   4   -0.20    0.46 
  -8  11   4   -0.02    0.39 
  -7  11   4    3.18    0.62 
  -6  11   4    0.76    0.34 
  -5  11   4    7.53    0.64 
  -4  11   4    8.30    0.63 
  -3  11   4   21.74    0.99 
  -2  11   4   66.86    1.73 
  -1  11   4    0.99    0.26 
   0  11   4   56.18    1.46 
   1  11   4   42.71    1.02 
   2  11   4    1.47    0.24 
   3  11   4   80.78    2.05 
   4  11   4    7.38    0.58 
   5  11   4   10.37    0.73 
   6  11   4   12.31    0.84 
   7  11   4    0.10    0.41 
  -7  12   4    0.33    0.38 
  -6  12   4    0.04    0.29 
  -5  12   4    1.04    0.34 
  -4  12   4   -0.07    0.22 
  -3  12   4    2.67    0.40 
  -2  12   4    2.91    0.40 
  -1  12   4   -0.36    0.20 
   0  12   4    0.83    0.27 
   1  12   4    0.30    0.23 
   2  12   4    1.49    0.32 
   3  12   4    1.24    0.31 
   4  12   4    0.17    0.26 
   5  12   4    1.05    0.34 
   6  12   4    0.46    0.31 
   7  12   4   -0.44    0.40 
  -7  13   4    1.82    0.55 
  -6  13   4    0.04    0.28 
  -5  13   4   14.21    0.90 
  -4  13   4    6.18    0.58 
  -3  13   4    8.75    0.64 
  -2  13   4   76.03    1.99 
  -1  13   4   -0.07    0.24 
   0  13   4   46.75    1.34 
   1  13   4   37.39    1.23 
   2  13   4    0.21    0.31 
   3  13   4   21.01    0.99 
   4  13   4   34.44    1.38 
   5  13   4   13.70    0.85 
   6  13   4    8.72    0.95 
   7  13   4   -0.01    0.44 
  -7  14   4    0.28    0.46 
  -6  14   4    0.04    0.31 
  -5  14   4    0.37    0.32 
  -4  14   4    0.50    0.30 
  -3  14   4    2.55    0.41 
  -2  14   4    2.36    0.39 
  -1  14   4    9.83    0.68 
   0  14   4    0.27    0.25 
   1  14   4    0.57    0.27 
   2  14   4    0.21    0.31 
   3  14   4    2.31    0.38 
   4  14   4    1.70    0.36 
   5  14   4    0.70    0.34 
   6  14   4    0.61    0.48 
   7  14   4    1.13    0.54 
  -6  15   4    0.79    0.39 
  -5  15   4   12.12    0.87 
  -4  15   4    8.95    0.74 
  -3  15   4    8.72    0.70 
  -2  15   4   38.42    1.47 
  -1  15   4    8.42    0.63 
   0  15   4   24.27    1.07 
   1  15   4   37.03    1.73 
   2  15   4    0.82    0.38 
   3  15   4   19.40    1.22 
   4  15   4    7.82    0.66 
   5  15   4    1.35    0.48 
   6  15   4    4.57    0.75 
  -6  16   4    1.05    0.44 
  -5  16   4    0.01    0.33 
  -4  16   4    1.07    0.39 
  -3  16   4    6.26    0.63 
  -2  16   4    3.10    0.47 
  -1  16   4   11.23    0.77 
   0  16   4    2.85    0.42 
   1  16   4    1.48    0.43 
   2  16   4    9.02    0.87 
   3  16   4    1.73    0.49 
   4  16   4    8.53    0.86 
   5  16   4    5.64    0.80 
   6  16   4   -0.33    0.40 
  -6  17   4    0.72    0.45 
  -5  17   4    4.37    0.61 
  -4  17   4    2.46    0.47 
  -3  17   4    0.37    0.32 
  -2  17   4    4.50    0.53 
  -1  17   4    6.82    0.62 
   0  17   4   15.00    1.10 
   1  17   4   11.61    0.98 
   2  17   4    1.84    0.50 
   3  17   4   19.17    1.28 
   4  17   4    2.42    0.85 
   5  17   4    2.20    0.92 
  -5  18   4   -0.12    0.36 
  -4  18   4   12.34    0.92 
  -3  18   4    4.48    0.58 
  -2  18   4    0.87    0.36 
  -1  18   4   17.17    0.98 
   0  18   4    8.43    0.87 
   1  18   4    7.01    0.81 
   2  18   4   23.70    1.44 
   3  18   4    5.34    0.75 
   4  18   4    1.56    0.80 
   5  18   4    7.30    1.40 
  -4  19   4    4.59    0.65 
  -3  19   4    1.14    0.43 
  -2  19   4    4.06    0.55 
  -1  19   4    0.35    0.33 
   0  19   4    2.97    0.59 
   1  19   4    2.96    0.61 
   2  19   4    5.16    0.73 
   3  19   4   10.94    1.52 
   4  19   4    1.40    0.85 
  -4  20   4    2.87    0.56 
  -3  20   4   10.73    0.89 
  -2  20   4    0.11    0.34 
  -1  20   4   19.77    1.39 
   0  20   4    9.78    0.99 
   1  20   4    2.03    0.55 
   2  20   4   19.34    1.38 
   3  20   4    1.60    0.86 
   4  20   4    0.12    0.75 
  -3  21   4    0.54    0.43 
  -2  21   4   -0.03    0.35 
  -1  21   4    0.77    0.49 
   0  21   4    0.54    0.48 
   1  21   4    0.44    0.47 
   2  21   4    0.03    0.62 
   3  21   4    1.39    0.87 
  -1  22   4    6.84    0.92 
   0  22   4    3.55    0.70 
   1  22   4    5.18    0.81 
  -2 -21   5    7.30    0.97 
  -1 -21   5   -0.01    0.62 
   0 -21   5   12.27    1.70 
   1 -21   5    4.56    1.09 
  -3 -20   5    1.25    0.57 
  -2 -20   5   -0.23    0.42 
  -1 -20   5    1.52    0.56 
   0 -20   5    0.56    0.63 
   1 -20   5    1.20    0.79 
   2 -20   5    4.55    0.73 
   3 -20   5    0.29    0.46 
  -4 -19   5    0.65    0.52 
  -3 -19   5    0.17    0.43 
  -2 -19   5    6.09    0.86 
  -1 -19   5    0.19    0.41 
   0 -19   5    9.66    1.40 
   1 -19   5    3.57    0.65 
   2 -19   5    2.59    0.58 
   3 -19   5    4.77    0.76 
   4 -19   5    2.89    0.68 
  -4 -18   5    0.23    0.47 
  -3 -18   5    2.40    0.61 
  -2 -18   5    4.17    0.67 
  -1 -18   5   10.72    1.03 
   0 -18   5    1.77    0.75 
   1 -18   5   11.67    1.04 
   2 -18   5    6.30    0.80 
   3 -18   5   -0.07    0.38 
   4 -18   5    2.63    0.64 
  -5 -17   5    3.81    0.62 
  -4 -17   5   -0.34    0.33 
  -3 -17   5    0.06    0.39 
  -2 -17   5    1.40    0.51 
  -1 -17   5    0.89    0.45 
   0 -17   5   14.45    1.09 
   1 -17   5    2.55    0.57 
   2 -17   5    0.62    0.40 
   3 -17   5    6.10    0.78 
   4 -17   5    1.15    0.41 
   5 -17   5    4.32    0.61 
  -6 -16   5    3.15    1.09 
  -5 -16   5   -0.02    0.34 
  -4 -16   5    4.40    0.60 
  -3 -16   5    2.46    0.47 
  -2 -16   5    0.14    0.37 
  -1 -16   5   30.93    1.67 
   0 -16   5    3.89    0.49 
   1 -16   5    7.03    0.79 
   2 -16   5   16.18    1.18 
   3 -16   5    0.04    0.34 
   4 -16   5    9.04    0.76 
   5 -16   5    4.23    0.58 
  -6 -15   5    0.51    0.51 
  -5 -15   5    0.86    0.41 
  -4 -15   5    0.19    0.31 
  -3 -15   5   20.53    1.13 
  -2 -15   5    8.13    0.85 
  -1 -15   5   -0.09    0.30 
   0 -15   5   10.23    0.72 
   1 -15   5    2.72    0.54 
   2 -15   5   -0.21    0.30 
   3 -15   5    4.18    0.52 
   4 -15   5    0.95    0.37 
   5 -15   5    1.00    0.38 
   6 -15   5    3.93    0.77 
  -6 -14   5    7.25    0.77 
  -5 -14   5    0.70    0.37 
  -4 -14   5    5.09    0.60 
  -3 -14   5   15.24    0.95 
  -2 -14   5    0.28    0.27 
  -1 -14   5   18.15    0.94 
   0 -14   5    3.62    0.44 
   1 -14   5   22.37    1.32 
   2 -14   5   13.18    1.00 
   3 -14   5    1.26    0.35 
   4 -14   5   19.69    1.05 
   5 -14   5    9.15    0.74 
   6 -14   5    1.73    0.57 
  -7 -13   5    1.35    0.62 
  -6 -13   5    0.32    0.38 
  -5 -13   5    1.65    0.43 
  -4 -13   5    0.30    0.32 
  -3 -13   5    6.95    0.63 
  -2 -13   5    6.57    0.75 
  -1 -13   5    0.40    0.26 
   0 -13   5    1.53    0.32 
   1 -13   5    2.68    0.48 
   2 -13   5    0.14    0.25 
   3 -13   5    3.08    0.44 
   4 -13   5    0.15    0.29 
   5 -13   5   -0.01    0.41 
   6 -13   5    0.10    0.42 
  -7 -12   5    0.81    0.54 
  -6 -12   5   12.13    0.92 
  -5 -12   5   -0.23    0.29 
  -4 -12   5   19.03    1.08 
  -3 -12   5    9.41    0.89 
  -2 -12   5    1.86    0.34 
  -1 -12   5   66.70    1.76 
   0 -12   5    4.34    0.45 
   1 -12   5   25.12    1.34 
   2 -12   5   41.88    1.46 
   3 -12   5    1.54    0.33 
   4 -12   5   40.05    1.49 
   5 -12   5   13.76    1.12 
   6 -12   5    3.68    0.69 
   7 -12   5    7.22    0.96 
  -7 -11   5   -0.06    0.45 
  -6 -11   5   -0.14    0.31 
  -5 -11   5    0.43    0.33 
  -4 -11   5    1.29    0.44 
  -3 -11   5    1.24    0.45 
  -2 -11   5    3.01    0.40 
  -1 -11   5    3.54    0.41 
   0 -11   5    3.48    0.41 
   1 -11   5    5.74    0.40 
   2 -11   5    5.77    0.51 
   3 -11   5   -0.09    0.23 
   4 -11   5    0.40    0.28 
   5 -11   5    0.01    0.35 
   6 -11   5   -0.03    0.39 
   7 -11   5    0.31    0.43 
  -7 -10   5    3.50    0.73 
  -6 -10   5    3.97    0.55 
  -5 -10   5    4.69    0.71 
  -4 -10   5   69.59    2.41 
  -3 -10   5   34.04    1.68 
  -2 -10   5   18.42    0.90 
  -1 -10   5   82.05    1.98 
   0 -10   5   46.27    1.31 
   1 -10   5   33.38    0.92 
   2 -10   5   88.90    2.14 
   3 -10   5    1.82    0.33 
   4 -10   5   22.78    1.03 
   5 -10   5   18.71    1.29 
   6 -10   5    4.11    0.67 
   7 -10   5    5.68    0.82 
  -8  -9   5   -0.09    0.48 
  -7  -9   5    1.73    0.56 
  -6  -9   5   -0.16    0.29 
  -5  -9   5    2.04    0.48 
  -4  -9   5    0.46    0.37 
  -3  -9   5    6.14    0.53 
  -2  -9   5    2.19    0.35 
  -1  -9   5    0.39    0.23 
   0  -9   5    9.06    0.46 
   1  -9   5   18.81    0.71 
   2  -9   5    0.86    0.26 
   3  -9   5    3.07    0.39 
   4  -9   5   -0.05    0.22 
   5  -9   5    3.87    0.50 
   6  -9   5    2.91    0.46 
   7  -9   5    0.66    0.38 
  -8  -8   5    0.33    0.51 
  -7  -8   5    1.43    0.45 
  -6  -8   5    3.25    0.62 
  -5  -8   5    1.67    0.45 
  -4  -8   5   15.71    1.11 
  -3  -8   5   21.09    0.95 
  -2  -8   5   37.06    1.22 
  -1  -8   5  103.33    2.35 
   0  -8   5   10.48    0.49 
   1  -8   5   64.43    1.35 
   2  -8   5   35.00    1.22 
   3  -8   5    0.61    0.26 
   4  -8   5   46.66    1.19 
   5  -8   5   11.80    0.80 
   6  -8   5    1.07    0.34 
   7  -8   5   18.36    1.12 
   8  -8   5    1.11    0.44 
  -8  -7   5    0.52    0.49 
  -7  -7   5    0.43    0.35 
  -6  -7   5   -0.16    0.33 
  -5  -7   5   16.77    1.21 
  -4  -7   5    4.95    0.63 
  -3  -7   5    0.72    0.27 
  -2  -7   5   42.81    1.25 
  -1  -7   5    2.86    0.34 
   0  -7   5   36.46    0.88 
   1  -7   5   26.35    0.78 
   2  -7   5   10.26    0.60 
   3  -7   5   12.38    0.57 
   4  -7   5    9.37    0.52 
   5  -7   5   12.32    0.81 
   6  -7   5    5.48    0.59 
   7  -7   5    0.11    0.33 
   8  -7   5    5.19    0.65 
  -8  -6   5    2.26    0.64 
  -7  -6   5    5.56    0.63 
  -6  -6   5    1.04    0.45 
  -5  -6   5   11.07    0.97 
  -4  -6   5    6.66    0.55 
  -3  -6   5    4.75    0.46 
  -2  -6   5    7.14    0.51 
  -1  -6   5   41.29    0.94 
   0  -6   5    0.16    0.14 
   1  -6   5   23.59    0.71 
   2  -6   5   81.93    1.65 
   3  -6   5    0.79    0.20 
   4  -6   5   12.88    0.60 
   5  -6   5    5.45    0.54 
   6  -6   5    0.77    0.32 
   7  -6   5    5.92    0.63 
   8  -6   5    0.30    0.38 
  -8  -5   5    5.51    0.81 
  -7  -5   5    0.30    0.38 
  -6  -5   5    3.66    0.61 
  -5  -5   5   15.66    1.10 
  -4  -5   5   31.34    1.22 
  -3  -5   5   19.55    0.90 
  -2  -5   5  106.79    2.42 
  -1  -5   5   20.75    0.65 
   0  -5   5   51.76    1.12 
   1  -5   5   35.48    0.84 
   2  -5   5   38.33    0.94 
   3  -5   5   65.36    1.37 
   4  -5   5    3.54    0.41 
   5  -5   5   13.25    0.80 
   6  -5   5   39.56    1.56 
   7  -5   5    0.53    0.35 
   8  -5   5    5.06    0.82 
  -8  -4   5    0.37    0.44 
  -7  -4   5    0.26    0.40 
  -6  -4   5    7.26    0.81 
  -5  -4   5   -0.07    0.25 
  -4  -4   5    9.84    0.66 
  -3  -4   5   24.14    1.01 
  -2  -4   5    0.29    0.14 
  -1  -4   5    3.81    0.28 
   0  -4   5    9.40    0.43 
   1  -4   5    6.64    0.31 
   2  -4   5   59.25    1.08 
   3  -4   5   22.69    0.74 
   4  -4   5   19.14    0.91 
   5  -4   5    0.13    0.24 
   6  -4   5    0.86    0.33 
   7  -4   5    0.06    0.30 
   8  -4   5   -0.26    0.45 
  -8  -3   5    2.18    0.59 
  -7  -3   5    7.60    0.86 
  -6  -3   5    0.65    0.38 
  -5  -3   5    9.40    0.68 
  -4  -3   5    3.99    0.44 
  -3  -3   5   32.42    1.19 
  -2  -3   5   27.43    0.86 
  -1  -3   5    0.51    0.17 
   0  -3   5  156.18    3.22 
   1  -3   5   45.12    0.99 
   2  -3   5   30.72    0.69 
   3  -3   5  157.80    2.83 
   4  -3   5    0.54    0.24 
   5  -3   5   40.28    1.45 
   6  -3   5   40.25    1.52 
   7  -3   5    5.08    0.57 
   8  -3   5    2.84    0.68 
  -8  -2   5    0.50    0.39 
  -7  -2   5    0.45    0.38 
  -6  -2   5    0.39    0.36 
  -5  -2   5    0.28    0.27 
  -4  -2   5   -0.06    0.21 
  -3  -2   5    0.33    0.18 
  -2  -2   5   16.37    0.66 
  -1  -2   5   15.48    0.64 
   0  -2   5    1.98    0.18 
   1  -2   5    0.34    0.13 
   2  -2   5   22.45    0.69 
   3  -2   5    0.01    0.13 
   4  -2   5   18.76    0.88 
   5  -2   5   17.76    0.90 
   6  -2   5    0.13    0.25 
   7  -2   5    0.43    0.40 
   8  -2   5    1.85    0.56 
  -8  -1   5    1.32    0.75 
  -7  -1   5    2.03    0.55 
  -6  -1   5   -0.06    0.26 
  -5  -1   5   27.01    1.16 
  -4  -1   5    5.03    0.58 
  -3  -1   5   40.72    1.12 
  -2  -1   5   88.28    1.98 
  -1  -1   5   25.03    0.82 
   0  -1   5   77.84    1.45 
   1  -1   5  107.61    1.98 
   2  -1   5    1.33    0.19 
   3  -1   5   92.39    1.76 
   4  -1   5   31.61    1.17 
   5  -1   5    4.44    0.46 
   6  -1   5    0.27    0.26 
   7  -1   5    0.10    0.38 
   8  -1   5    7.37    0.93 
  -8   0   5   -0.27    0.34 
  -7   0   5   -0.05    0.35 
  -6   0   5    0.11    0.26 
  -5   0   5   -0.01    0.28 
  -4   0   5   -0.19    0.18 
  -3   0   5    0.18    0.18 
  -2   0   5    0.03    0.15 
  -1   0   5    0.25    0.16 
   0   0   5   -0.03    0.10 
   1   0   5    0.02    0.11 
   2   0   5    0.00    0.12 
   3   0   5    0.02    0.13 
   4   0   5    0.13    0.22 
   5   0   5    0.20    0.24 
   6   0   5   -0.03    0.22 
   7   0   5    0.25    0.41 
   8   0   5    0.66    0.49 
  -8   1   5    1.61    0.54 
  -7   1   5    1.81    0.52 
  -6   1   5   -0.30    0.27 
  -5   1   5   26.97    1.40 
  -4   1   5    5.58    0.45 
  -3   1   5   40.15    1.14 
  -2   1   5   87.70    2.00 
  -1   1   5   25.83    0.64 
   0   1   5   77.10    1.47 
   1   1   5  108.55    1.99 
   2   1   5    1.11    0.17 
   3   1   5   90.15    2.08 
   4   1   5   29.89    1.06 
   5   1   5    4.60    0.46 
   6   1   5    0.36    0.35 
   7   1   5    0.63    0.40 
   8   1   5    3.94    0.72 
  -8   2   5    0.02    0.39 
  -7   2   5    0.57    0.33 
  -6   2   5   -0.06    0.31 
  -5   2   5    0.29    0.24 
  -4   2   5   -0.16    0.20 
  -3   2   5    0.74    0.22 
  -2   2   5   14.16    0.47 
  -1   2   5   15.21    0.49 
   0   2   5    2.31    0.22 
   1   2   5    0.02    0.12 
   2   2   5   24.69    0.70 
   3   2   5    0.03    0.19 
   4   2   5   18.32    0.72 
   5   2   5   18.00    0.76 
   6   2   5    0.41    0.29 
   7   2   5   -0.04    0.30 
   8   2   5    2.55    0.61 
  -8   3   5    2.25    0.55 
  -7   3   5    6.99    0.80 
  -6   3   5    0.23    0.34 
  -5   3   5   10.07    0.66 
  -4   3   5    3.42    0.38 
  -3   3   5   32.69    1.09 
  -2   3   5   27.38    0.75 
  -1   3   5    0.38    0.14 
   0   3   5  159.75    2.78 
   1   3   5   46.64    1.00 
   2   3   5   30.49    0.77 
   3   3   5  158.84    2.86 
   4   3   5    0.18    0.19 
   5   3   5   37.20    1.13 
   6   3   5   39.51    1.54 
   7   3   5    5.92    0.62 
   8   3   5    4.12    0.58 
  -8   4   5    0.41    0.42 
  -7   4   5    0.05    0.32 
  -6   4   5    9.54    0.68 
  -5   4   5   -0.06    0.21 
  -4   4   5    7.96    0.68 
  -3   4   5   23.63    1.16 
  -2   4   5    0.09    0.14 
  -1   4   5    3.11    0.28 
   0   4   5   10.15    0.44 
   1   4   5    6.11    0.35 
   2   4   5   60.52    1.09 
   3   4   5   23.60    0.81 
   4   4   5   21.72    0.79 
   5   4   5    0.09    0.25 
   6   4   5    2.12    0.40 
   7   4   5   -0.16    0.29 
   8   4   5   -0.13    0.33 
  -8   5   5    3.00    0.61 
  -7   5   5    0.17    0.37 
  -6   5   5    3.72    0.46 
  -5   5   5   17.21    1.05 
  -4   5   5   27.57    1.33 
  -3   5   5   23.37    0.87 
  -2   5   5  107.19    2.32 
  -1   5   5   21.22    0.74 
   0   5   5   53.20    1.31 
   1   5   5   36.45    0.74 
   2   5   5   39.93    0.82 
   3   5   5   63.79    1.37 
   4   5   5    2.98    0.31 
   5   5   5   10.43    0.71 
   6   5   5   39.07    1.54 
   7   5   5    0.42    0.34 
   8   5   5    6.85    0.74 
  -8   6   5    1.87    0.57 
  -7   6   5    5.27    0.71 
  -6   6   5    1.85    0.44 
  -5   6   5   13.66    0.97 
  -4   6   5    4.88    0.56 
  -3   6   5    5.50    0.43 
  -2   6   5    5.73    0.41 
  -1   6   5   39.17    1.08 
   0   6   5    0.59    0.20 
   1   6   5   23.15    0.68 
   2   6   5   84.43    1.45 
   3   6   5    0.89    0.21 
   4   6   5   13.85    0.77 
   5   6   5    7.16    0.59 
   6   6   5    0.92    0.33 
   7   6   5    5.38    0.62 
   8   6   5    0.89    0.43 
  -8   7   5    0.57    0.48 
  -7   7   5    0.76    0.41 
  -6   7   5    0.04    0.31 
  -5   7   5   17.58    1.14 
  -4   7   5    4.20    0.55 
  -3   7   5    1.18    0.26 
  -2   7   5   44.28    1.19 
  -1   7   5    2.00    0.29 
   0   7   5   36.97    1.05 
   1   7   5   28.78    0.79 
   2   7   5   10.36    0.49 
   3   7   5   11.11    0.55 
   4   7   5    8.63    0.60 
   5   7   5   11.08    0.75 
   6   7   5    4.48    0.53 
   7   7   5    0.58    0.34 
   8   7   5    4.90    0.64 
  -8   8   5   -0.05    0.41 
  -7   8   5    0.78    0.41 
  -6   8   5    4.26    0.64 
  -5   8   5    0.84    0.39 
  -4   8   5   15.74    1.03 
  -3   8   5   21.53    0.91 
  -2   8   5   33.67    1.13 
  -1   8   5  103.81    2.32 
   0   8   5   10.88    0.62 
   1   8   5   63.05    1.59 
   2   8   5   34.80    0.94 
   3   8   5    0.35    0.20 
   4   8   5   44.44    1.45 
   5   8   5   12.33    0.80 
   6   8   5    1.47    0.38 
   7   8   5   17.63    1.07 
   8   8   5    1.02    0.46 
  -8   9   5    0.98    0.69 
  -7   9   5    0.81    0.44 
  -6   9   5    0.01    0.34 
  -5   9   5    2.17    0.49 
  -4   9   5    1.02    0.39 
  -3   9   5    8.09    0.56 
  -2   9   5    2.12    0.33 
  -1   9   5    0.12    0.22 
   0   9   5    9.28    0.58 
   1   9   5   20.71    0.88 
   2   9   5    1.06    0.23 
   3   9   5    2.45    0.35 
   4   9   5   -0.18    0.22 
   5   9   5    2.72    0.42 
   6   9   5    2.04    0.43 
   7   9   5    0.79    0.36 
  -7  10   5    4.21    0.68 
  -6  10   5    3.46    0.61 
  -5  10   5    6.81    0.72 
  -4  10   5   68.70    1.89 
  -3  10   5   36.14    1.24 
  -2  10   5   20.45    0.92 
  -1  10   5   80.87    1.95 
   0  10   5   47.44    1.32 
   1  10   5   32.64    1.20 
   2  10   5   89.82    2.13 
   3  10   5    2.46    0.35 
   4  10   5   20.16    1.00 
   5  10   5   20.77    1.05 
   6  10   5    2.71    0.45 
   7  10   5    5.68    0.65 
  -7  11   5    0.11    0.39 
  -6  11   5    0.19    0.37 
  -5  11   5    0.59    0.40 
  -4  11   5    0.95    0.32 
  -3  11   5    2.58    0.38 
  -2  11   5    3.30    0.41 
  -1  11   5    3.21    0.40 
   0  11   5    3.39    0.41 
   1  11   5    6.23    0.52 
   2  11   5    5.90    0.50 
   3  11   5    0.21    0.33 
   4  11   5    0.78    0.30 
   5  11   5   -0.12    0.26 
   6  11   5    0.33    0.32 
   7  11   5    1.05    0.42 
  -7  12   5    0.81    0.47 
  -6  12   5   13.65    1.15 
  -5  12   5    0.23    0.40 
  -4  12   5   23.03    1.11 
  -3  12   5   11.34    0.74 
  -2  12   5    2.23    0.37 
  -1  12   5   64.59    1.74 
   0  12   5    4.86    0.46 
   1  12   5   26.05    1.06 
   2  12   5   44.24    1.90 
   3  12   5    1.55    0.44 
   4  12   5   37.92    1.50 
   5  12   5   13.75    0.87 
   6  12   5    5.34    0.61 
   7  12   5    9.24    1.07 
  -7  13   5    0.13    0.44 
  -6  13   5    0.20    0.41 
  -5  13   5    0.94    0.44 
  -4  13   5    0.17    0.29 
  -3  13   5    8.62    0.67 
  -2  13   5    6.31    0.57 
  -1  13   5    0.22    0.24 
   0  13   5    1.41    0.31 
   1  13   5    3.08    0.41 
   2  13   5    0.18    0.32 
   3  13   5    4.20    0.60 
   4  13   5    0.65    0.39 
   5  13   5    0.37    0.33 
   6  13   5    0.15    0.33 
  -6  14   5    8.09    0.97 
  -5  14   5    0.53    0.44 
  -4  14   5    5.70    0.59 
  -3  14   5   16.03    0.94 
  -2  14   5    0.39    0.27 
  -1  14   5   19.41    0.97 
   0  14   5    3.88    0.46 
   1  14   5   20.91    1.26 
   2  14   5   15.49    1.10 
   3  14   5    1.36    0.45 
   4  14   5   22.68    1.40 
   5  14   5    9.17    0.92 
   6  14   5    2.05    0.87 
  -6  15   5    0.60    0.49 
  -5  15   5    0.24    0.44 
  -4  15   5   -0.17    0.29 
  -3  15   5   21.30    1.11 
  -2  15   5    8.11    0.68 
  -1  15   5    0.01    0.25 
   0  15   5    9.14    0.67 
   1  15   5    2.70    0.53 
   2  15   5   -0.15    0.33 
   3  15   5    5.32    0.73 
   4  15   5    2.46    0.56 
   5  15   5    1.19    0.50 
   6  15   5    3.91    1.10 
  -6  16   5    3.84    0.81 
  -5  16   5    0.04    0.46 
  -4  16   5    4.44    0.59 
  -3  16   5    2.24    0.45 
  -2  16   5    0.08    0.30 
  -1  16   5   29.70    1.29 
   0  16   5    3.70    0.49 
   1  16   5    7.12    0.79 
   2  16   5   17.75    1.24 
   3  16   5    0.18    0.39 
   4  16   5    9.77    0.99 
   5  16   5    4.33    0.78 
  -5  17   5    4.19    0.78 
  -4  17   5    0.22    0.36 
  -3  17   5    0.00    0.30 
  -2  17   5    1.49    0.40 
  -1  17   5    0.48    0.32 
   0  17   5   11.88    1.02 
   1  17   5    5.00    0.70 
   2  17   5    0.71    0.43 
   3  17   5    7.43    0.85 
   4  17   5    0.83    0.48 
   5  17   5    4.37    1.12 
  -4  18   5    0.29    0.38 
  -3  18   5    1.46    0.44 
  -2  18   5    4.65    0.59 
  -1  18   5   10.17    0.79 
   0  18   5    2.44    0.58 
   1  18   5   14.32    1.15 
   2  18   5    8.17    0.92 
   3  18   5   -0.07    0.39 
   4  18   5    3.15    0.68 
  -4  19   5    0.01    0.38 
  -3  19   5   -0.17    0.34 
  -2  19   5    8.72    0.80 
  -1  19   5   -0.16    0.39 
   0  19   5    8.95    0.94 
   1  19   5    2.58    0.62 
   2  19   5    2.19    0.60 
   3  19   5    4.05    0.73 
   4  19   5    1.58    0.89 
  -3  20   5    1.01    0.46 
  -2  20   5    0.49    0.38 
  -1  20   5    0.73    0.50 
   0  20   5    0.11    0.43 
   1  20   5    0.86    0.45 
   2  20   5    3.84    0.73 
   3  20   5   -0.11    0.46 
  -2  21   5    9.51    1.07 
  -1  21   5    0.09    0.45 
   0  21   5   14.00    1.22 
   1  21   5    3.83    0.76 
  -2 -20   6    6.00    1.34 
  -1 -20   6    9.17    1.53 
   0 -20   6   -0.08    0.69 
   1 -20   6    6.62    1.35 
  -3 -19   6    0.20    0.52 
  -2 -19   6    0.95    0.54 
  -1 -19   6    0.09    0.68 
   0 -19   6    5.96    1.25 
   1 -19   6    0.65    0.48 
   2 -19   6    0.27    0.46 
   3 -19   6    0.91    0.53 
  -4 -18   6    0.28    0.51 
  -3 -18   6    0.00    0.45 
  -2 -18   6    6.94    0.87 
  -1 -18   6   10.74    1.50 
   0 -18   6   -0.30    0.51 
   1 -18   6   12.29    1.12 
   2 -18   6    9.77    1.02 
   3 -18   6   -0.10    0.41 
  -4 -17   6    0.86    0.54 
  -3 -17   6    4.17    0.76 
  -2 -17   6    9.41    1.00 
  -1 -17   6   -0.12    0.36 
   0 -17   6   14.42    1.15 
   1 -17   6    2.34    0.54 
   2 -17   6    1.14    0.50 
   3 -17   6    9.10    0.98 
   4 -17   6    0.55    0.45 
  -5 -16   6   -0.11    0.36 
  -4 -16   6    5.45    0.67 
  -3 -16   6    0.00    0.41 
  -2 -16   6    2.67    0.60 
  -1 -16   6    3.04    0.58 
   0 -16   6    0.75    0.43 
   1 -16   6    4.33    0.66 
   2 -16   6    8.55    0.90 
   3 -16   6    1.27    0.49 
   4 -16   6    3.65    0.67 
   5 -16   6    3.46    0.73 
  -5 -15   6    2.44    0.54 
  -4 -15   6    0.07    0.33 
  -3 -15   6   18.56    1.12 
  -2 -15   6   13.81    1.16 
  -1 -15   6    1.26    0.46 
   0 -15   6   16.13    1.18 
   1 -15   6    9.49    0.92 
   2 -15   6   13.39    1.09 
   3 -15   6   15.62    1.16 
   4 -15   6    0.08    0.32 
   5 -15   6    2.58    0.66 
  -6 -14   6    0.41    0.43 
  -5 -14   6    0.84    0.39 
  -4 -14   6   10.90    0.85 
  -3 -14   6    3.82    0.52 
  -2 -14   6    0.88    0.44 
  -1 -14   6    2.50    0.41 
   0 -14   6    1.03    0.41 
   1 -14   6    1.17    0.42 
   2 -14   6    0.76    0.42 
   3 -14   6    0.30    0.37 
   4 -14   6    4.29    0.57 
   5 -14   6    3.28    0.66 
   6 -14   6    0.16    0.50 
  -6 -13   6   -0.15    0.37 
  -5 -13   6    5.26    0.63 
  -4 -13   6    0.14    0.30 
  -3 -13   6   10.24    1.01 
  -2 -13   6    3.17    0.58 
  -1 -13   6   18.00    0.97 
   0 -13   6   48.40    1.73 
   1 -13   6   12.46    1.00 
   2 -13   6    9.08    0.86 
   3 -13   6   36.65    1.45 
   4 -13   6    0.27    0.28 
   5 -13   6   12.28    1.11 
   6 -13   6    7.83    0.95 
  -6 -12   6   -0.23    0.34 
  -5 -12   6   -0.28    0.27 
  -4 -12   6    0.41    0.41 
  -3 -12   6    0.46    0.42 
  -2 -12   6   -0.28    0.23 
  -1 -12   6    0.77    0.30 
   0 -12   6    0.02    0.24 
   1 -12   6    6.67    0.71 
   2 -12   6    0.43    0.34 
   3 -12   6    0.18    0.26 
   4 -12   6    0.03    0.26 
   5 -12   6   -0.27    0.36 
   6 -12   6   -0.23    0.44 
  -7 -11   6    2.25    0.66 
  -6 -11   6    0.84    0.42 
  -5 -11   6   23.74    1.63 
  -4 -11   6    2.24    0.55 
  -3 -11   6   12.12    1.02 
  -2 -11   6   20.62    1.03 
  -1 -11   6    0.40    0.26 
   0 -11   6   33.96    1.28 
   1 -11   6   40.37    1.81 
   2 -11   6   27.35    1.13 
   3 -11   6   26.08    1.18 
   4 -11   6    1.62    0.38 
   5 -11   6   17.90    1.29 
   6 -11   6    8.12    0.91 
  -7 -10   6    0.02    0.36 
  -6 -10   6    1.09    0.42 
  -5 -10   6   -0.10    0.40 
  -4 -10   6    7.94    0.89 
  -3 -10   6    4.86    0.70 
  -2 -10   6    1.62    0.35 
  -1 -10   6    0.27    0.25 
   0 -10   6    4.87    0.48 
   1 -10   6    0.36    0.33 
   2 -10   6    2.24    0.36 
   3 -10   6    8.18    0.62 
   4 -10   6    4.30    0.49 
   5 -10   6   -0.08    0.36 
   6 -10   6    0.61    0.45 
   7 -10   6    0.43    0.49 
  -7  -9   6    0.25    0.35 
  -6  -9   6    3.39    0.66 
  -5  -9   6   15.16    1.21 
  -4  -9   6    8.22    0.88 
  -3  -9   6   35.10    1.36 
  -2  -9   6   48.86    1.53 
  -1  -9   6   23.93    1.05 
   0  -9   6   54.46    1.49 
   1  -9   6    6.52    0.52 
   2  -9   6   19.21    0.90 
   3  -9   6   48.69    1.47 
   4  -9   6    5.00    0.67 
   5  -9   6    9.24    0.74 
   6  -9   6   20.53    1.16 
   7  -9   6    0.41    0.38 
  -7  -8   6    0.71    0.37 
  -6  -8   6    6.00    0.81 
  -5  -8   6    2.10    0.54 
  -4  -8   6    4.63    0.67 
  -3  -8   6   -0.10    0.24 
  -2  -8   6    0.70    0.29 
  -1  -8   6    1.23    0.30 
   0  -8   6    5.36    0.47 
   1  -8   6   28.04    1.09 
   2  -8   6    5.04    0.48 
   3  -8   6    8.04    0.59 
   4  -8   6   10.62    0.73 
   5  -8   6    0.60    0.31 
   6  -8   6    3.48    0.52 
   7  -8   6    9.24    0.81 
  -7  -7   6   -0.26    0.41 
  -6  -7   6    0.21    0.40 
  -5  -7   6    5.30    0.74 
  -4  -7   6    0.38    0.38 
  -3  -7   6    6.86    0.59 
  -2  -7   6   35.20    1.32 
  -1  -7   6   19.75    0.93 
   0  -7   6   88.62    1.78 
   1  -7   6    8.86    0.48 
   2  -7   6   14.39    0.74 
   3  -7   6   35.88    1.06 
   4  -7   6    6.86    0.59 
   5  -7   6   26.90    1.24 
   6  -7   6   19.11    1.10 
   7  -7   6   -0.32    0.29 
  -8  -6   6    0.60    0.48 
  -7  -6   6   -0.16    0.41 
  -6  -6   6    4.80    0.73 
  -5  -6   6    0.25    0.35 
  -4  -6   6   21.59    1.06 
  -3  -6   6   15.77    0.86 
  -2  -6   6    7.76    0.59 
  -1  -6   6   49.88    1.38 
   0  -6   6    4.56    0.35 
   1  -6   6   33.76    0.94 
   2  -6   6   12.64    0.58 
   3  -6   6    0.45    0.20 
   4  -6   6   11.53    0.73 
   5  -6   6    8.85    0.69 
   6  -6   6    0.99    0.35 
   7  -6   6    4.58    0.59 
  -8  -5   6    1.91    0.63 
  -7  -5   6    0.13    0.40 
  -6  -5   6    1.80    0.51 
  -5  -5   6    1.88    0.50 
  -4  -5   6    1.67    0.35 
  -3  -5   6    9.73    0.68 
  -2  -5   6   16.75    0.86 
  -1  -5   6   20.22    0.72 
   0  -5   6   46.61    1.08 
   1  -5   6   19.51    0.70 
   2  -5   6    8.04    0.45 
   3  -5   6   16.98    0.70 
   4  -5   6    0.85    0.29 
   5  -5   6    5.71    0.56 
   6  -5   6    0.11    0.26 
   7  -5   6    1.57    0.43 
   8  -5   6    2.24    0.69 
  -8  -4   6   -0.13    0.42 
  -7  -4   6    1.07    0.46 
  -6  -4   6    1.70    0.52 
  -5  -4   6    0.40    0.27 
  -4  -4   6   28.90    1.22 
  -3  -4   6    8.24    0.62 
  -2  -4   6   16.11    0.83 
  -1  -4   6   88.28    1.77 
   0  -4   6    5.11    0.36 
   1  -4   6   88.57    1.54 
   2  -4   6   63.79    1.38 
   3  -4   6    1.77    0.25 
   4  -4   6   20.61    0.97 
   5  -4   6   33.39    1.36 
   6  -4   6    1.73    0.41 
   7  -4   6    1.48    0.42 
   8  -4   6    0.75    0.54 
  -8  -3   6    0.99    0.51 
  -7  -3   6    4.37    0.72 
  -6  -3   6    7.85    0.88 
  -5  -3   6   -0.01    0.24 
  -4  -3   6    0.22    0.25 
  -3  -3   6   13.30    0.76 
  -2  -3   6    6.98    0.66 
  -1  -3   6   14.98    0.69 
   0  -3   6   16.00    0.73 
   1  -3   6    0.26    0.15 
   2  -3   6    0.73    0.20 
   3  -3   6   32.52    0.95 
   4  -3   6    1.36    0.31 
   5  -3   6    1.46    0.34 
   6  -3   6    0.46    0.32 
   7  -3   6    0.83    0.36 
   8  -3   6    0.75    0.50 
  -8  -2   6    1.40    0.56 
  -7  -2   6    5.72    0.82 
  -6  -2   6    6.28    0.78 
  -5  -2   6    0.77    0.29 
  -4  -2   6   12.14    0.92 
  -3  -2   6    7.91    0.71 
  -2  -2   6   19.25    0.82 
  -1  -2   6  118.48    2.56 
   0  -2   6    1.21    0.25 
   1  -2   6   59.45    1.24 
   2  -2   6   94.46    1.82 
   3  -2   6    4.23    0.43 
   4  -2   6   79.34    2.00 
   5  -2   6    4.14    0.48 
   6  -2   6    7.73    0.67 
   7  -2   6   13.13    1.15 
   8  -2   6    0.96    0.56 
  -8  -1   6   -0.02    0.40 
  -7  -1   6    0.48    0.43 
  -6  -1   6    0.14    0.27 
  -5  -1   6   -0.13    0.29 
  -4  -1   6    0.64    0.36 
  -3  -1   6    2.54    0.46 
  -2  -1   6    0.44    0.21 
  -1  -1   6   18.87    0.79 
   0  -1   6    0.94    0.23 
   1  -1   6    0.51    0.17 
   2  -1   6    2.09    0.24 
   3  -1   6    1.05    0.28 
   4  -1   6    0.76    0.27 
   5  -1   6    6.16    0.55 
   6  -1   6    0.10    0.26 
   7  -1   6    0.06    0.37 
   8  -1   6    0.46    0.46 
  -8   0   6    0.38    0.45 
  -7   0   6    5.39    0.76 
  -6   0   6    7.31    0.66 
  -5   0   6    0.63    0.36 
  -4   0   6   19.41    1.19 
  -3   0   6   47.97    1.31 
  -2   0   6   50.05    1.34 
  -1   0   6   56.11    1.41 
   0   0   6    5.85    0.44 
   1   0   6   45.33    1.01 
   2   0   6   41.56    0.99 
   3   0   6    0.26    0.23 
   4   0   6   81.83    2.03 
   5   0   6    0.45    0.27 
   6   0   6   25.76    1.21 
   7   0   6    9.58    0.99 
   8   0   6    1.00    0.54 
  -8   1   6   -0.17    0.41 
  -7   1   6    1.32    0.48 
  -6   1   6   -0.56    0.29 
  -5   1   6   -0.05    0.31 
  -4   1   6    0.17    0.31 
  -3   1   6    1.40    0.29 
  -2   1   6    0.55    0.24 
  -1   1   6   16.21    0.75 
   0   1   6    1.41    0.20 
   1   1   6    1.02    0.19 
   2   1   6    2.12    0.25 
   3   1   6    1.19    0.28 
   4   1   6    1.66    0.33 
   5   1   6    5.74    0.54 
   6   1   6    0.59    0.39 
   7   1   6   -0.26    0.38 
   8   1   6    0.11    0.45 
  -8   2   6    1.53    0.57 
  -7   2   6    4.54    0.57 
  -6   2   6    6.55    0.76 
  -5   2   6    1.55    0.43 
  -4   2   6   12.98    0.75 
  -3   2   6    7.88    0.57 
  -2   2   6   20.82    0.89 
  -1   2   6  116.72    2.59 
   0   2   6    1.86    0.23 
   1   2   6   59.64    1.26 
   2   2   6   92.61    1.81 
   3   2   6    3.58    0.39 
   4   2   6   79.31    1.99 
   5   2   6    4.02    0.44 
   6   2   6    6.23    0.77 
   7   2   6   11.93    1.08 
   8   2   6    0.15    0.45 
  -8   3   6    0.47    0.48 
  -7   3   6    4.91    0.73 
  -6   3   6    6.45    0.77 
  -5   3   6    0.39    0.32 
  -4   3   6    0.10    0.24 
  -3   3   6   11.14    0.67 
  -2   3   6    6.89    0.52 
  -1   3   6   12.64    0.68 
   0   3   6   14.73    0.58 
   1   3   6    0.25    0.17 
   2   3   6    0.84    0.19 
   3   3   6   33.36    1.20 
   4   3   6    0.81    0.27 
   5   3   6    1.88    0.35 
   6   3   6    0.25    0.38 
   7   3   6    0.51    0.46 
   8   3   6    0.36    0.48 
  -8   4   6    0.14    0.41 
  -7   4   6    0.84    0.46 
  -6   4   6    1.81    0.49 
  -5   4   6    0.69    0.30 
  -4   4   6   30.39    1.22 
  -3   4   6    9.57    0.63 
  -2   4   6   18.12    0.86 
  -1   4   6   88.00    2.08 
   0   4   6    4.36    0.33 
   1   4   6   88.26    1.75 
   2   4   6   66.14    1.40 
   3   4   6    1.49    0.31 
   4   4   6   19.79    0.79 
   5   4   6   32.74    1.35 
   6   4   6    1.07    0.34 
   7   4   6    1.00    0.39 
   8   4   6    0.14    0.48 
  -8   5   6    1.84    0.59 
  -7   5   6    0.15    0.38 
  -6   5   6    1.38    0.46 
  -5   5   6    2.24    0.39 
  -4   5   6    1.17    0.31 
  -3   5   6    7.45    0.58 
  -2   5   6   18.76    0.89 
  -1   5   6   18.89    0.74 
   0   5   6   45.31    1.07 
   1   5   6   18.63    0.70 
   2   5   6    6.79    0.52 
   3   5   6   17.67    0.71 
   4   5   6    0.65    0.22 
   5   5   6    6.25    0.58 
   6   5   6    0.20    0.30 
   7   5   6    2.42    0.48 
   8   5   6    2.51    0.55 
  -8   6   6   -0.36    0.40 
  -7   6   6   -0.07    0.37 
  -6   6   6    3.52    0.48 
  -5   6   6   -0.19    0.24 
  -4   6   6   23.35    1.29 
  -3   6   6   10.20    0.82 
  -2   6   6    9.15    0.76 
  -1   6   6   50.24    1.31 
   0   6   6    3.54    0.36 
   1   6   6   32.66    0.92 
   2   6   6   10.30    0.63 
   3   6   6    0.74    0.23 
   4   6   6    9.60    0.67 
   5   6   6    7.97    0.65 
   6   6   6    0.51    0.32 
   7   6   6    4.74    0.61 
  -8   7   6    0.01    0.45 
  -7   7   6   -0.25    0.33 
  -6   7   6    0.06    0.28 
  -5   7   6    3.27    0.56 
  -4   7   6    1.07    0.39 
  -3   7   6    5.37    0.63 
  -2   7   6   35.07    1.57 
  -1   7   6   21.13    0.88 
   0   7   6   88.67    2.08 
   1   7   6    9.08    0.58 
   2   7   6   15.39    0.78 
   3   7   6   38.51    1.05 
   4   7   6    6.45    0.56 
   5   7   6   27.00    1.23 
   6   7   6   18.73    1.07 
   7   7   6   -0.23    0.32 
  -7   8   6    1.03    0.49 
  -6   8   6    3.79    0.61 
  -5   8   6    0.90    0.41 
  -4   8   6    6.02    0.69 
  -3   8   6    0.15    0.31 
  -2   8   6    1.12    0.37 
  -1   8   6    1.38    0.30 
   0   8   6    5.13    0.45 
   1   8   6   29.40    1.12 
   2   8   6    4.95    0.47 
   3   8   6    8.13    0.60 
   4   8   6   11.23    0.73 
   5   8   6    0.09    0.27 
   6   8   6    4.42    0.52 
   7   8   6    8.74    0.79 
  -7   9   6    1.18    0.49 
  -6   9   6    2.46    0.56 
  -5   9   6   15.51    1.16 
  -4   9   6    8.76    0.83 
  -3   9   6   32.87    1.62 
  -2   9   6   52.46    1.85 
  -1   9   6   27.22    1.08 
   0   9   6   53.44    1.47 
   1   9   6    6.77    0.53 
   2   9   6   17.64    0.87 
   3   9   6   49.65    1.90 
   4   9   6    4.71    0.65 
   5   9   6   11.12    0.79 
   6   9   6   21.67    1.16 
   7   9   6   -0.34    0.33 
  -7  10   6   -0.27    0.37 
  -6  10   6    0.19    0.39 
  -5  10   6    0.43    0.39 
  -4  10   6    9.29    0.90 
  -3  10   6    3.26    0.54 
  -2  10   6    0.70    0.30 
  -1  10   6    0.07    0.24 
   0  10   6    4.84    0.47 
   1  10   6    0.19    0.23 
   2  10   6    2.71    0.38 
   3  10   6    8.65    0.82 
   4  10   6    4.52    0.66 
   5  10   6    0.15    0.36 
   6  10   6    0.46    0.34 
   7  10   6    0.58    0.38 
  -7  11   6    1.92    0.57 
  -6  11   6    0.63    0.44 
  -5  11   6   26.51    1.58 
  -4  11   6    1.21    0.45 
  -3  11   6   12.36    0.99 
  -2  11   6   20.07    0.97 
  -1  11   6    0.34    0.26 
   0  11   6   32.53    1.26 
   1  11   6   40.64    1.44 
   2  11   6   25.45    1.12 
   3  11   6   29.04    1.54 
   4  11   6    1.63    0.47 
   5  11   6   17.64    1.27 
   6  11   6    5.89    0.82 
  -6  12   6    0.05    0.42 
  -5  12   6    0.02    0.38 
  -4  12   6    0.43    0.41 
  -3  12   6    1.99    0.51 
  -2  12   6   -0.03    0.24 
  -1  12   6    1.06    0.30 
   0  12   6    0.06    0.23 
   1  12   6    5.76    0.53 
   2  12   6    0.80    0.38 
   3  12   6    0.23    0.36 
   4  12   6    0.96    0.43 
   5  12   6    0.24    0.40 
   6  12   6    0.04    0.42 
  -6  13   6   -0.11    0.42 
  -5  13   6    4.77    0.73 
  -4  13   6   -0.57    0.34 
  -3  13   6   12.34    1.04 
  -2  13   6    3.30    0.44 
  -1  13   6   17.76    0.95 
   0  13   6   45.93    1.63 
   1  13   6   12.35    0.77 
   2  13   6   11.15    0.95 
   3  13   6   35.68    1.83 
   4  13   6    0.11    0.35 
   5  13   6   11.09    1.05 
   6  13   6    7.69    0.94 
  -6  14   6    0.68    0.51 
  -5  14   6    0.77    0.47 
  -4  14   6   11.21    1.09 
  -3  14   6    5.14    0.73 
  -2  14   6    1.06    0.35 
  -1  14   6    2.50    0.43 
   0  14   6    0.72    0.32 
   1  14   6    0.03    0.34 
   2  14   6    0.99    0.41 
   3  14   6    0.15    0.37 
   4  14   6    4.74    0.70 
   5  14   6    4.31    0.72 
   6  14   6    0.73    0.47 
  -5  15   6    2.56    0.68 
  -4  15   6   -0.03    0.38 
  -3  15   6   19.16    1.33 
  -2  15   6   12.64    0.85 
  -1  15   6    1.56    0.38 
   0  15   6   17.73    0.98 
   1  15   6   11.77    1.01 
   2  15   6    9.94    0.93 
   3  15   6   14.10    1.15 
   4  15   6    0.07    0.39 
   5  15   6    3.38    0.69 
  -5  16   6   -0.16    0.49 
  -4  16   6    4.03    0.75 
  -3  16   6    0.54    0.47 
  -2  16   6    2.21    0.44 
  -1  16   6    3.00    0.48 
   0  16   6    0.84    0.36 
   1  16   6    4.80    0.70 
   2  16   6    9.18    0.92 
   3  16   6    0.65    0.46 
   4  16   6    3.77    0.68 
   5  16   6    2.86    0.68 
  -4  17   6    0.84    0.54 
  -3  17   6    4.38    0.75 
  -2  17   6   10.70    0.84 
  -1  17   6    0.73    0.35 
   0  17   6   16.56    1.23 
   1  17   6    2.36    0.56 
   2  17   6    1.50    0.52 
   3  17   6   10.95    1.07 
   4  17   6    0.43    0.48 
  -4  18   6   -0.24    0.44 
  -3  18   6    0.32    0.49 
  -2  18   6    6.63    0.71 
  -1  18   6    7.52    0.71 
   0  18   6    0.10    0.40 
   1  18   6   10.64    1.02 
   2  18   6   11.86    1.07 
   3  18   6    0.65    0.48 
  -3  19   6    0.14    0.50 
  -2  19   6    2.13    0.50 
  -1  19   6    0.48    0.46 
   0  19   6    4.33    0.74 
   1  19   6    0.13    0.42 
   2  19   6    0.84    0.51 
   3  19   6    1.25    0.58 
  -2  20   6    4.53    0.66 
  -1  20   6    9.61    1.05 
   0  20   6   -0.24    0.43 
   1  20   6    7.52    0.96 
  -1 -19   7    2.92    1.08 
   0 -19   7    5.17    1.19 
   1 -19   7    1.41    0.60 
  -2 -18   7    2.54    0.70 
  -1 -18   7    7.06    1.33 
   0 -18   7    0.95    0.78 
   1 -18   7    5.01    0.80 
   2 -18   7    3.47    0.73 
  -3 -17   7    4.02    0.77 
  -2 -17   7    0.27    0.45 
  -1 -17   7    2.59    0.89 
   0 -17   7    6.89    0.98 
   1 -17   7    2.08    0.61 
   2 -17   7    5.88    0.82 
   3 -17   7    3.91    0.74 
  -4 -16   7    5.80    0.92 
  -3 -16   7    5.52    0.83 
  -2 -16   7    3.21    0.69 
  -1 -16   7    9.55    1.43 
   0 -16   7    0.78    0.45 
   1 -16   7    7.23    0.89 
   2 -16   7    4.87    0.75 
   3 -16   7    2.46    0.59 
   4 -16   7    3.95    0.73 
  -5 -15   7    0.59    0.43 
  -4 -15   7    0.23    0.37 
  -3 -15   7   -0.14    0.43 
  -2 -15   7   -0.44    0.37 
  -1 -15   7    0.70    0.73 
   0 -15   7    0.49    0.41 
   1 -15   7   -0.11    0.36 
   2 -15   7    4.56    0.72 
   3 -15   7    2.98    0.63 
   4 -15   7    1.17    0.59 
  -5 -14   7    0.11    0.37 
  -4 -14   7   12.53    1.19 
  -3 -14   7    2.74    0.63 
  -2 -14   7   11.24    1.05 
  -1 -14   7   15.93    0.98 
   0 -14   7    0.75    0.43 
   1 -14   7   20.17    1.34 
   2 -14   7   10.51    0.99 
   3 -14   7    4.70    0.68 
   4 -14   7   20.08    2.12 
   5 -14   7    0.44    0.51 
  -5 -13   7    0.16    0.37 
  -4 -13   7    0.14    0.42 
  -3 -13   7    0.28    0.39 
  -2 -13   7   -0.02    0.33 
  -1 -13   7    0.07    0.27 
   0 -13   7    0.21    0.35 
   1 -13   7    0.39    0.37 
   2 -13   7    1.26    0.46 
   3 -13   7    6.12    0.74 
   4 -13   7    0.59    0.45 
   5 -13   7   -0.64    0.40 
  -6 -12   7    1.71    0.52 
  -5 -12   7    1.29    0.55 
  -4 -12   7    3.56    0.70 
  -3 -12   7    0.95    0.49 
  -2 -12   7   24.75    1.21 
  -1 -12   7   16.34    0.93 
   0 -12   7   -0.09    0.36 
   1 -12   7   33.28    1.74 
   2 -12   7   30.73    1.63 
   3 -12   7    6.28    0.64 
   4 -12   7   29.28    1.71 
   5 -12   7    0.13    0.44 
   6 -12   7    3.23    0.68 
  -6 -11   7    0.39    0.53 
  -5 -11   7    0.01    0.43 
  -4 -11   7    1.21    0.51 
  -3 -11   7    1.43    0.50 
  -2 -11   7    1.22    0.35 
  -1 -11   7    0.21    0.28 
   0 -11   7    3.44    0.57 
   1 -11   7    1.19    0.43 
   2 -11   7    0.65    0.36 
   3 -11   7    0.70    0.32 
   4 -11   7    0.65    0.43 
   5 -11   7    0.40    0.43 
   6 -11   7    0.90    0.50 
  -6 -10   7    2.00    0.65 
  -5 -10   7    0.51    0.46 
  -4 -10   7   11.25    1.06 
  -3 -10   7    0.56    0.40 
  -2 -10   7    1.74    0.37 
  -1 -10   7   25.15    1.16 
   0 -10   7    0.35    0.34 
   1 -10   7   36.61    1.78 
   2 -10   7    9.23    0.68 
   3 -10   7    6.08    0.57 
   4 -10   7   21.29    1.41 
   5 -10   7    1.33    0.49 
   6 -10   7    1.09    0.50 
  -7  -9   7    0.13    0.40 
  -6  -9   7    0.52    0.45 
  -5  -9   7    0.50    0.46 
  -4  -9   7   -0.21    0.35 
  -3  -9   7    0.42    0.30 
  -2  -9   7    1.35    0.34 
  -1  -9   7    1.33    0.33 
   0  -9   7   12.90    0.78 
   1  -9   7    0.88    0.37 
   2  -9   7   13.04    0.77 
   3  -9   7   17.92    0.95 
   4  -9   7    0.20    0.36 
   5  -9   7    0.75    0.46 
   6  -9   7    0.53    0.37 
  -7  -8   7    1.88    0.61 
  -6  -8   7    1.73    0.54 
  -5  -8   7    0.28    0.46 
  -4  -8   7    9.43    0.99 
  -3  -8   7    2.65    0.42 
  -2  -8   7   11.25    0.77 
  -1  -8   7   21.73    1.03 
   0  -8   7   30.69    1.22 
   1  -8   7   25.36    1.10 
   2  -8   7   18.80    0.94 
   3  -8   7    4.47    0.49 
   4  -8   7   16.51    0.96 
   5  -8   7    8.27    0.72 
   6  -8   7    3.42    0.55 
   7  -8   7    0.68    0.42 
  -7  -7   7    0.31    0.49 
  -6  -7   7   -0.42    0.38 
  -5  -7   7    1.67    0.54 
  -4  -7   7   -0.33    0.32 
  -3  -7   7    2.48    0.42 
  -2  -7   7   14.80    0.87 
  -1  -7   7   12.82    0.79 
   0  -7   7   13.01    0.77 
   1  -7   7    3.23    0.40 
   2  -7   7    2.88    0.38 
   3  -7   7   22.90    0.88 
   4  -7   7    0.53    0.30 
   5  -7   7    6.91    0.63 
   6  -7   7    3.80    0.53 
   7  -7   7   -0.12    0.36 
  -7  -6   7    0.57    0.49 
  -6  -6   7    4.97    0.81 
  -5  -6   7    1.21    0.47 
  -4  -6   7    7.51    0.65 
  -3  -6   7    1.09    0.34 
  -2  -6   7   32.13    1.30 
  -1  -6   7   27.35    1.15 
   0  -6   7    0.25    0.23 
   1  -6   7   71.99    1.86 
   2  -6   7    2.43    0.38 
   3  -6   7    0.06    0.20 
   4  -6   7   23.50    1.11 
   5  -6   7    0.33    0.31 
   6  -6   7    7.34    0.70 
   7  -6   7    8.66    0.81 
  -7  -5   7   -0.06    0.42 
  -6  -5   7    0.99    0.45 
  -5  -5   7    8.67    0.94 
  -4  -5   7    4.71    0.54 
  -3  -5   7   20.48    1.05 
  -2  -5   7   36.27    1.39 
  -1  -5   7    1.14    0.31 
   0  -5   7   15.84    0.69 
   1  -5   7    0.36    0.25 
   2  -5   7    3.82    0.42 
   3  -5   7   14.52    0.80 
   4  -5   7    0.05    0.25 
   5  -5   7   16.87    0.98 
   6  -5   7    1.89    0.45 
   7  -5   7    1.69    0.46 
  -7  -4   7    0.68    0.49 
  -6  -4   7    1.15    0.48 
  -5  -4   7    2.85    0.49 
  -4  -4   7    8.34    0.69 
  -3  -4   7   -0.03    0.25 
  -2  -4   7    5.84    0.54 
  -1  -4   7   46.03    1.36 
   0  -4   7   18.47    0.74 
   1  -4   7   18.56    0.86 
   2  -4   7   11.07    0.66 
   3  -4   7    9.07    0.63 
   4  -4   7    1.70    0.36 
   5  -4   7    0.97    0.34 
   6  -4   7    4.12    0.55 
   7  -4   7    3.12    0.52 
  -7  -3   7    1.24    0.51 
  -6  -3   7    4.48    0.76 
  -5  -3   7   10.96    0.81 
  -4  -3   7   -0.02    0.26 
  -3  -3   7    9.65    0.70 
  -2  -3   7   16.74    1.07 
  -1  -3   7    9.43    0.59 
   0  -3   7   60.33    1.57 
   1  -3   7    6.64    0.51 
   2  -3   7   65.11    1.69 
   3  -3   7   28.08    1.13 
   4  -3   7    0.13    0.25 
   5  -3   7   18.87    1.02 
   6  -3   7    4.89    0.57 
   7  -3   7    1.06    0.52 
  -7  -2   7    0.05    0.40 
  -6  -2   7   -0.39    0.32 
  -5  -2   7    0.17    0.29 
  -4  -2   7    3.59    0.56 
  -3  -2   7    0.59    0.35 
  -2  -2   7    0.06    0.30 
  -1  -2   7    0.74    0.25 
   0  -2   7    0.20    0.21 
   1  -2   7   15.13    0.77 
   2  -2   7   12.72    0.62 
   3  -2   7    1.00    0.29 
   4  -2   7    4.59    0.49 
   5  -2   7    2.48    0.42 
   6  -2   7    2.56    0.45 
   7  -2   7    0.82    0.49 
  -7  -1   7    2.21    0.63 
  -6  -1   7    2.39    0.46 
  -5  -1   7   13.22    1.07 
  -4  -1   7    5.50    0.68 
  -3  -1   7   56.91    2.06 
  -2  -1   7   11.07    0.67 
  -1  -1   7   16.44    0.79 
   0  -1   7  155.17    3.29 
   1  -1   7   25.63    1.03 
   2  -1   7   49.68    1.17 
   3  -1   7   54.93    1.52 
   4  -1   7    0.13    0.24 
   5  -1   7   23.27    1.14 
   6  -1   7   11.69    0.83 
   7  -1   7    5.51    0.81 
  -7   0   7   -0.52    0.34 
  -6   0   7    0.01    0.28 
  -5   0   7    0.24    0.36 
  -4   0   7   -0.24    0.28 
  -3   0   7    0.28    0.34 
  -2   0   7    0.17    0.22 
  -1   0   7    0.13    0.22 
   0   0   7    0.39    0.24 
   1   0   7   -0.07    0.20 
   2   0   7    0.19    0.18 
   3   0   7   -0.28    0.21 
   4   0   7   -0.24    0.20 
   5   0   7   -0.06    0.25 
   6   0   7   -0.48    0.30 
   7   0   7    0.30    0.46 
  -7   1   7    2.84    0.69 
  -6   1   7    1.82    0.51 
  -5   1   7   11.93    1.01 
  -4   1   7    3.87    0.60 
  -3   1   7   62.01    1.66 
  -2   1   7    9.85    0.64 
  -1   1   7   17.46    0.85 
   0   1   7  153.54    3.29 
   1   1   7   21.04    0.93 
   2   1   7   51.29    1.40 
   3   1   7   52.05    1.50 
   4   1   7    0.04    0.23 
   5   1   7   21.97    1.11 
   6   1   7   12.54    1.08 
   7   1   7    3.57    0.71 
  -7   2   7    0.46    0.43 
  -6   2   7    0.17    0.36 
  -5   2   7    0.17    0.36 
  -4   2   7    3.98    0.61 
  -3   2   7    0.23    0.27 
  -2   2   7   -0.11    0.22 
  -1   2   7    1.66    0.31 
   0   2   7    0.27    0.24 
   1   2   7   15.59    0.78 
   2   2   7   12.17    0.70 
   3   2   7    0.63    0.27 
   4   2   7    5.12    0.51 
   5   2   7    2.20    0.40 
   6   2   7    1.52    0.51 
   7   2   7    0.80    0.49 
  -7   3   7    0.45    0.42 
  -6   3   7    5.10    0.75 
  -5   3   7   10.79    1.02 
  -4   3   7    0.28    0.25 
  -3   3   7    8.43    0.62 
  -2   3   7   17.20    0.86 
  -1   3   7   10.24    0.66 
   0   3   7   59.64    1.58 
   1   3   7    7.77    0.54 
   2   3   7   69.07    1.73 
   3   3   7   25.73    1.10 
   4   3   7    0.25    0.25 
   5   3   7   19.08    1.29 
   6   3   7    5.79    0.80 
   7   3   7    1.95    0.59 
  -7   4   7    0.97    0.49 
  -6   4   7    1.15    0.47 
  -5   4   7    2.84    0.59 
  -4   4   7    7.59    0.62 
  -3   4   7    0.53    0.28 
  -2   4   7    4.92    0.49 
  -1   4   7   48.49    1.66 
   0   4   7   17.49    0.85 
   1   4   7   19.54    0.90 
   2   4   7   12.08    0.72 
   3   4   7    9.41    0.64 
   4   4   7    2.39    0.38 
   5   4   7    1.81    0.50 
   6   4   7    4.96    0.72 
   7   4   7    3.15    0.65 
  -7   5   7   -0.21    0.39 
  -6   5   7    1.32    0.51 
  -5   5   7    6.60    0.82 
  -4   5   7    3.51    0.45 
  -3   5   7   22.99    1.08 
  -2   5   7   34.69    1.32 
  -1   5   7    0.61    0.29 
   0   5   7   17.37    0.85 
   1   5   7    0.37    0.20 
   2   5   7    3.15    0.41 
   3   5   7   13.56    0.79 
   4   5   7    0.13    0.25 
   5   5   7   18.34    1.26 
   6   5   7    1.09    0.47 
   7   5   7    1.94    0.57 
  -7   6   7    0.44    0.45 
  -6   6   7    3.13    0.63 
  -5   6   7    2.05    0.38 
  -4   6   7    7.58    0.63 
  -3   6   7    0.95    0.31 
  -2   6   7   31.11    1.26 
  -1   6   7   27.75    1.17 
   0   6   7    0.24    0.26 
   1   6   7   75.93    1.61 
   2   6   7    3.05    0.40 
   3   6   7   -0.14    0.22 
   4   6   7   23.71    1.39 
   5   6   7    1.01    0.35 
   6   6   7    7.55    0.71 
   7   6   7   10.26    1.06 
  -7   7   7    0.06    0.42 
  -6   7   7   -0.01    0.38 
  -5   7   7    1.86    0.41 
  -4   7   7   -0.15    0.25 
  -3   7   7    3.01    0.55 
  -2   7   7   14.42    1.04 
  -1   7   7   14.69    0.81 
   0   7   7   11.96    0.72 
   1   7   7    3.29    0.34 
   2   7   7    2.56    0.38 
   3   7   7   23.27    1.07 
   4   7   7    0.25    0.35 
   5   7   7    7.91    0.88 
   6   7   7    3.47    0.55 
   7   7   7    0.01    0.37 
  -7   8   7    1.40    0.55 
  -6   8   7    1.91    0.46 
  -5   8   7    0.16    0.30 
  -4   8   7   10.78    0.94 
  -3   8   7    2.73    0.53 
  -2   8   7   11.27    0.91 
  -1   8   7   21.17    1.24 
   0   8   7   24.63    1.35 
   1   8   7   28.30    0.99 
   2   8   7   20.46    0.97 
   3   8   7    5.50    0.53 
   4   8   7   21.61    1.32 
   5   8   7    5.52    0.76 
   6   8   7    4.85    0.77 
   7   8   7    1.18    0.54 
  -7   9   7    0.52    0.44 
  -6   9   7    0.24    0.35 
  -5   9   7    0.50    0.39 
  -4   9   7   -0.13    0.33 
  -3   9   7    0.32    0.36 
  -2   9   7    1.56    0.46 
  -1   9   7    2.41    0.51 
   0   9   7   15.19    1.01 
   1   9   7    0.50    0.26 
   2   9   7   12.96    0.79 
   3   9   7   16.83    1.17 
   4   9   7   -0.30    0.33 
   5   9   7    1.93    0.53 
   6   9   7    0.15    0.43 
  -6  10   7    2.07    0.60 
  -5  10   7    1.55    0.50 
  -4  10   7   10.83    0.99 
  -3  10   7    0.87    0.40 
  -2  10   7    1.93    0.49 
  -1  10   7   26.77    1.47 
   0  10   7    0.51    0.34 
   1  10   7   32.90    1.31 
   2  10   7   10.50    0.72 
   3  10   7    6.44    0.76 
   4  10   7   21.33    1.45 
   5  10   7    2.44    0.57 
   6  10   7    0.27    0.47 
  -6  11   7    0.18    0.44 
  -5  11   7    0.19    0.44 
  -4  11   7    0.79    0.43 
  -3  11   7    2.27    0.55 
  -2  11   7    1.39    0.44 
  -1  11   7   -0.10    0.32 
   0  11   7    3.89    0.47 
   1  11   7    0.70    0.30 
   2  11   7    0.29    0.35 
   3  11   7    0.36    0.39 
   4  11   7   -0.09    0.35 
   5  11   7    0.18    0.43 
   6  11   7    1.08    0.53 
  -6  12   7    1.31    0.55 
  -5  12   7    1.28    0.52 
  -4  12   7    3.72    0.69 
  -3  12   7    1.31    0.47 
  -2  12   7   24.72    1.46 
  -1  12   7   15.44    1.15 
   0  12   7    0.10    0.26 
   1  12   7   39.44    1.50 
   2  12   7   32.42    1.72 
   3  12   7    5.91    0.74 
   4  12   7   32.25    1.82 
   5  12   7    0.15    0.42 
   6  12   7    5.06    0.80 
  -5  13   7    0.04    0.44 
  -4  13   7    0.56    0.45 
  -3  13   7    0.42    0.42 
  -2  13   7    0.00    0.36 
  -1  13   7    0.23    0.37 
   0  13   7   -0.22    0.24 
   1  13   7    0.33    0.29 
   2  13   7    1.66    0.50 
   3  13   7    6.24    0.76 
   4  13   7    0.37    0.41 
   5  13   7   -0.18    0.44 
  -5  14   7    1.54    0.57 
  -4  14   7   15.64    1.24 
  -3  14   7    1.29    0.51 
  -2  14   7    9.48    0.97 
  -1  14   7   16.57    1.25 
   0  14   7    0.95    0.34 
   1  14   7   18.61    1.28 
   2  14   7   11.46    1.02 
   3  14   7    4.04    0.69 
   4  14   7   19.93    1.43 
   5  14   7    0.98    0.51 
  -5  15   7    0.85    0.55 
  -4  15   7    0.09    0.41 
  -3  15   7    0.86    0.47 
  -2  15   7    0.13    0.40 
  -1  15   7    0.38    0.41 
   0  15   7    0.71    0.31 
   1  15   7   -0.03    0.34 
   2  15   7    3.46    0.66 
   3  15   7    4.51    0.72 
   4  15   7    0.24    0.46 
  -4  16   7    6.90    0.93 
  -3  16   7    4.68    0.72 
  -2  16   7    4.24    0.74 
  -1  16   7   12.66    1.10 
   0  16   7    0.82    0.43 
   1  16   7    8.15    0.90 
   2  16   7    6.41    0.83 
   3  16   7    6.03    0.83 
   4  16   7    5.19    0.84 
  -3  17   7    3.47    0.72 
  -2  17   7    0.39    0.46 
  -1  17   7    2.29    0.62 
   0  17   7    8.25    0.94 
   1  17   7    1.95    0.56 
   2  17   7    6.23    0.83 
   3  17   7    6.02    0.86 
  -2  18   7    1.94    0.62 
  -1  18   7    6.29    0.85 
   0  18   7    2.41    0.60 
   1  18   7    5.83    0.83 
   2  18   7    5.30    0.82 
  -1  19   7    0.69    0.79 
   0  19   7    6.78    0.88 
   1  19   7    1.42    0.58 
  -2 -17   8    1.16    0.91 
  -1 -17   8    1.56    0.87 
   0 -17   8    4.53    1.18 
   1 -17   8    1.25    0.55 
  -3 -16   8    0.10    0.50 
  -2 -16   8   -0.63    0.70 
  -1 -16   8    0.88    0.82 
   0 -16   8    2.21    0.63 
   1 -16   8    5.77    0.85 
   2 -16   8    0.04    0.46 
  -3 -15   8    3.02    0.72 
  -2 -15   8    3.59    0.85 
  -1 -15   8    1.70    0.82 
   0 -15   8   17.11    1.32 
   1 -15   8    0.28    0.42 
   2 -15   8    7.07    0.90 
   3 -15   8    4.61    0.74 
  -4 -14   8   -0.90    0.38 
  -3 -14   8   -0.60    0.39 
  -2 -14   8    1.96    0.58 
  -1 -14   8    0.12    0.41 
   0 -14   8   -0.28    0.37 
   1 -14   8    1.35    0.49 
   2 -14   8    0.37    0.42 
   3 -14   8    0.65    0.50 
   4 -14   8    0.45    0.67 
  -5 -13   8    2.24    0.70 
  -4 -13   8    0.26    0.51 
  -3 -13   8    6.04    0.85 
  -2 -13   8    1.65    0.54 
  -1 -13   8    8.39    0.93 
   0 -13   8   21.94    1.48 
   1 -13   8   -0.39    0.35 
   2 -13   8   15.55    1.21 
   3 -13   8   15.77    1.24 
   4 -13   8   -0.29    0.60 
  -5 -12   8    0.52    0.54 
  -4 -12   8   -0.43    0.38 
  -3 -12   8    0.66    0.47 
  -2 -12   8    0.09    0.29 
  -1 -12   8   -0.40    0.34 
   0 -12   8    3.44    0.62 
   1 -12   8    0.34    0.40 
   2 -12   8    0.14    0.39 
   3 -12   8    0.70    0.42 
   4 -12   8    0.53    0.63 
   5 -12   8   -0.04    0.48 
  -5 -11   8    1.92    0.64 
  -4 -11   8    0.64    0.47 
  -3 -11   8    7.08    0.91 
  -2 -11   8    5.61    0.63 
  -1 -11   8    8.68    0.89 
   0 -11   8   30.48    1.73 
   1 -11   8   -0.50    0.31 
   2 -11   8   19.85    1.32 
   3 -11   8   14.16    1.13 
   4 -11   8    3.01    0.64 
   5 -11   8    7.66    0.95 
  -6 -10   8   -0.29    0.47 
  -5 -10   8   -0.24    0.42 
  -4 -10   8    0.75    0.46 
  -3 -10   8   -0.29    0.35 
  -2 -10   8    1.16    0.37 
  -1 -10   8    7.57    0.68 
   0 -10   8    0.52    0.38 
   1 -10   8    0.47    0.40 
   2 -10   8    0.49    0.38 
   3 -10   8    0.17    0.36 
   4 -10   8   -0.46    0.36 
   5 -10   8    0.09    0.44 
  -6  -9   8    2.00    0.61 
  -5  -9   8    2.63    0.66 
  -4  -9   8    0.76    0.47 
  -3  -9   8    8.52    0.74 
  -2  -9   8    6.37    0.65 
  -1  -9   8   24.89    1.18 
   0  -9   8   12.41    1.03 
   1  -9   8    0.18    0.35 
   2  -9   8   30.76    1.64 
   3  -9   8   16.22    1.22 
   4  -9   8    0.71    0.43 
   5  -9   8   15.02    1.26 
   6  -9   8    0.36    0.47 
  -6  -8   8    0.52    0.52 
  -5  -8   8    3.51    0.69 
  -4  -8   8    0.42    0.44 
  -3  -8   8    1.95    0.43 
  -2  -8   8    4.78    0.57 
  -1  -8   8    7.08    0.63 
   0  -8   8    0.32    0.37 
   1  -8   8   13.98    1.06 
   2  -8   8    1.99    0.39 
   3  -8   8    0.62    0.41 
   4  -8   8    4.42    0.72 
   5  -8   8   -0.22    0.40 
   6  -8   8   -0.02    0.37 
  -6  -7   8   -0.31    0.42 
  -5  -7   8    1.10    0.50 
  -4  -7   8   -0.32    0.36 
  -3  -7   8   22.51    1.17 
  -2  -7   8    0.12    0.28 
  -1  -7   8   24.20    1.15 
   0  -7   8   18.07    1.21 
   1  -7   8    0.73    0.38 
   2  -7   8   20.23    1.02 
   3  -7   8   32.07    1.67 
   4  -7   8    0.97    0.44 
   5  -7   8   10.26    1.03 
   6  -7   8    3.67    0.58 
  -6  -6   8    2.13    0.63 
  -5  -6   8   -0.03    0.41 
  -4  -6   8    4.80    0.59 
  -3  -6   8    0.52    0.32 
  -2  -6   8   32.97    1.42 
  -1  -6   8    4.27    0.49 
   0  -6   8    8.86    0.84 
   1  -6   8    6.00    0.54 
   2  -6   8    5.35    0.52 
   3  -6   8    9.49    0.89 
   4  -6   8   17.97    1.27 
   5  -6   8   -0.27    0.37 
   6  -6   8    4.52    0.60 
  -7  -5   8    0.36    0.52 
  -6  -5   8    0.49    0.46 
  -5  -5   8    4.25    0.73 
  -4  -5   8    1.25    0.37 
  -3  -5   8   17.39    1.01 
  -2  -5   8    4.34    0.53 
  -1  -5   8    0.10    0.26 
   0  -5   8   34.06    1.34 
   1  -5   8    1.37    0.33 
   2  -5   8    4.74    0.49 
   3  -5   8    4.35    0.64 
   4  -5   8    3.85    0.62 
   5  -5   8    4.10    0.53 
   6  -5   8    4.94    0.62 
  -7  -4   8    2.11    0.63 
  -6  -4   8    0.65    0.49 
  -5  -4   8    0.26    0.34 
  -4  -4   8    8.47    0.74 
  -3  -4   8    0.98    0.36 
  -2  -4   8   13.12    0.85 
  -1  -4   8    6.95    0.61 
   0  -4   8   42.44    1.25 
   1  -4   8   57.90    1.60 
   2  -4   8    9.28    0.64 
   3  -4   8   15.72    1.09 
   4  -4   8   34.31    1.79 
   5  -4   8    0.62    0.35 
   6  -4   8    5.97    0.67 
  -7  -3   8    0.68    0.52 
  -6  -3   8    1.40    0.54 
  -5  -3   8    2.28    0.45 
  -4  -3   8    1.81    0.40 
  -3  -3   8    2.98    0.46 
  -2  -3   8    0.19    0.35 
  -1  -3   8    0.09    0.32 
   0  -3   8    3.72    0.43 
   1  -3   8    3.87    0.45 
   2  -3   8   20.57    0.97 
   3  -3   8    0.03    0.31 
   4  -3   8   -0.27    0.32 
   5  -3   8    1.35    0.38 
   6  -3   8    0.34    0.33 
  -7  -2   8    0.73    0.53 
  -6  -2   8    0.42    0.42 
  -5  -2   8    3.71    0.54 
  -4  -2   8   11.96    1.01 
  -3  -2   8    1.32    0.43 
  -2  -2   8   20.23    1.30 
  -1  -2   8   19.35    1.22 
   0  -2   8    0.15    0.23 
   1  -2   8   82.77    2.06 
   2  -2   8   15.33    1.06 
   3  -2   8   19.45    1.23 
   4  -2   8   20.03    1.31 
   5  -2   8    0.38    0.33 
   6  -2   8    7.11    0.70 
   7  -2   8    9.37    1.11 
  -7  -1   8    0.59    0.49 
  -6  -1   8   -0.48    0.28 
  -5  -1   8    0.95    0.36 
  -4  -1   8    0.95    0.43 
  -3  -1   8   -0.23    0.30 
  -2  -1   8    1.56    0.46 
  -1  -1   8    1.24    0.31 
   0  -1   8    1.25    0.29 
   1  -1   8    1.01    0.29 
   2  -1   8    4.01    0.58 
   3  -1   8    2.38    0.49 
   4  -1   8    0.21    0.30 
   5  -1   8    0.67    0.31 
   6  -1   8   -0.15    0.30 
   7  -1   8    0.31    0.52 
  -7   0   8    0.08    0.45 
  -6   0   8    2.51    0.48 
  -5   0   8    3.80    0.65 
  -4   0   8   34.02    1.83 
  -3   0   8    0.62    0.38 
  -2   0   8   17.03    1.20 
  -1   0   8   99.62    2.39 
   0   0   8   28.04    1.37 
   1   0   8   15.87    0.84 
   2   0   8   10.05    0.86 
   3   0   8    8.36    0.80 
   4   0   8   14.82    0.89 
   5   0   8    0.08    0.29 
   6   0   8   14.87    1.22 
   7   0   8    4.03    0.77 
  -7   1   8    0.09    0.45 
  -6   1   8   -0.04    0.42 
  -5   1   8    2.50    0.60 
  -4   1   8    0.66    0.42 
  -3   1   8   -0.01    0.32 
  -2   1   8    1.08    0.31 
  -1   1   8    0.86    0.30 
   0   1   8    1.15    0.31 
   1   1   8    1.05    0.31 
   2   1   8    4.82    0.64 
   3   1   8    2.89    0.51 
   4   1   8    0.14    0.27 
   5   1   8    0.56    0.32 
   6   1   8    0.34    0.40 
   7   1   8    0.08    0.47 
  -7   2   8    0.32    0.40 
  -6   2   8    0.48    0.46 
  -5   2   8    5.12    0.77 
  -4   2   8   10.19    1.00 
  -3   2   8    1.52    0.44 
  -2   2   8   22.98    1.07 
  -1   2   8   17.37    0.90 
   0   2   8    0.12    0.24 
   1   2   8   84.35    2.08 
   2   2   8   16.51    1.08 
   3   2   8   20.04    1.27 
   4   2   8   17.46    0.96 
   5   2   8    0.20    0.30 
   6   2   8    7.21    0.89 
   7   2   8    7.33    1.02 
  -7   3   8   -0.21    0.45 
  -6   3   8    0.04    0.41 
  -5   3   8    3.07    0.59 
  -4   3   8    0.67    0.41 
  -3   3   8    3.02    0.44 
  -2   3   8    0.29    0.28 
  -1   3   8    0.17    0.25 
   0   3   8    3.55    0.43 
   1   3   8    3.38    0.41 
   2   3   8   19.12    1.20 
   3   3   8    0.22    0.34 
   4   3   8   -0.30    0.26 
   5   3   8    1.36    0.48 
   6   3   8    0.55    0.46 
  -7   4   8    1.87    0.61 
  -6   4   8    0.79    0.45 
  -5   4   8    0.14    0.41 
  -4   4   8    8.76    0.92 
  -3   4   8    0.74    0.31 
  -2   4   8   14.26    0.85 
  -1   4   8    6.23    0.56 
   0   4   8   43.22    1.52 
   1   4   8   56.93    1.59 
   2   4   8    9.59    0.85 
   3   4   8   15.95    1.12 
   4   4   8   35.12    1.43 
   5   4   8    0.31    0.42 
   6   4   8    4.91    0.77 
  -7   5   8    0.17    0.47 
  -6   5   8    0.95    0.48 
  -5   5   8    2.29    0.57 
  -4   5   8    1.05    0.37 
  -3   5   8   15.27    0.92 
  -2   5   8    4.27    0.51 
  -1   5   8   -0.20    0.24 
   0   5   8   34.01    1.35 
   1   5   8    1.91    0.45 
   2   5   8    4.04    0.58 
   3   5   8    4.56    0.55 
   4   5   8    2.52    0.43 
   5   5   8    3.12    0.63 
   6   5   8    4.02    0.73 
  -6   6   8    1.97    0.60 
  -5   6   8   -0.16    0.36 
  -4   6   8    4.85    0.57 
  -3   6   8    0.46    0.32 
  -2   6   8   35.54    1.41 
  -1   6   8    4.07    0.49 
   0   6   8    8.08    0.63 
   1   6   8    5.55    0.69 
   2   6   8    4.81    0.65 
   3   6   8    8.49    0.67 
   4   6   8   17.80    1.26 
   5   6   8   -0.12    0.37 
   6   6   8    3.90    0.74 
  -6   7   8   -0.07    0.42 
  -5   7   8    2.96    0.67 
  -4   7   8   -0.45    0.25 
  -3   7   8   22.11    1.14 
  -2   7   8    0.48    0.30 
  -1   7   8   21.01    1.06 
   0   7   8   17.73    0.96 
   1   7   8    0.50    0.36 
   2   7   8   18.65    1.24 
   3   7   8   34.68    1.41 
   4   7   8    1.17    0.44 
   5   7   8   10.94    1.05 
   6   7   8    3.91    0.75 
  -6   8   8    0.38    0.50 
  -5   8   8    3.32    0.51 
  -4   8   8   -0.33    0.27 
  -3   8   8    2.24    0.43 
  -2   8   8    5.70    0.59 
  -1   8   8    7.35    0.65 
   0   8   8    1.02    0.32 
   1   8   8   18.60    1.21 
   2   8   8    1.82    0.49 
   3   8   8    0.34    0.30 
   4   8   8    4.55    0.70 
   5   8   8    0.23    0.41 
   6   8   8    0.28    0.47 
  -6   9   8    1.47    0.59 
  -5   9   8    2.32    0.51 
  -4   9   8    0.19    0.32 
  -3   9   8    9.58    0.77 
  -2   9   8    6.61    0.62 
  -1   9   8   24.86    1.19 
   0   9   8   13.43    0.84 
   1   9   8    0.48    0.39 
   2   9   8   35.19    1.77 
   3   9   8   14.52    1.14 
   4   9   8    0.74    0.43 
   5   9   8   13.40    1.18 
   6   9   8    0.07    0.47 
  -6  10   8    0.25    0.47 
  -5  10   8   -0.09    0.33 
  -4  10   8    0.33    0.43 
  -3  10   8   -0.29    0.38 
  -2  10   8    1.14    0.46 
  -1  10   8    6.82    0.79 
   0  10   8   -0.14    0.27 
   1  10   8    0.30    0.36 
   2  10   8    0.54    0.39 
   3  10   8    0.09    0.39 
   4  10   8   -0.36    0.35 
   5  10   8    0.21    0.45 
  -5  11   8    1.64    0.56 
  -4  11   8    0.18    0.43 
  -3  11   8    8.46    0.95 
  -2  11   8    3.63    0.64 
  -1  11   8    9.16    0.92 
   0  11   8   34.02    1.77 
   1  11   8   -0.16    0.34 
   2  11   8   20.88    1.93 
   3  11   8   15.05    1.19 
   4  11   8    3.56    0.67 
   5  11   8    7.11    0.94 
  -5  12   8   -0.02    0.46 
  -4  12   8    0.31    0.44 
  -3  12   8    0.28    0.44 
  -2  12   8    0.51    0.44 
  -1  12   8   -0.06    0.36 
   0  12   8    1.76    0.52 
   1  12   8    0.91    0.40 
   2  12   8    0.33    0.58 
   3  12   8    0.77    0.46 
   4  12   8   -0.60    0.36 
   5  12   8   -0.48    0.38 
  -5  13   8    2.39    0.69 
  -4  13   8    0.06    0.45 
  -3  13   8    8.67    1.00 
  -2  13   8    1.28    0.50 
  -1  13   8    6.81    0.83 
   0  13   8   23.02    1.49 
   1  13   8   -0.02    0.35 
   2  13   8   17.56    1.86 
   3  13   8   17.90    1.35 
   4  13   8    0.16    0.44 
  -4  14   8    0.10    0.48 
  -3  14   8   -0.33    0.40 
  -2  14   8    1.84    0.53 
  -1  14   8   -0.72    0.36 
   0  14   8    0.23    0.41 
   1  14   8    0.14    0.57 
   2  14   8    1.35    0.56 
   3  14   8    0.85    0.48 
   4  14   8    0.67    0.51 
  -3  15   8    2.94    0.67 
  -2  15   8    2.40    0.63 
  -1  15   8    1.71    0.57 
   0  15   8   16.59    1.29 
   1  15   8    0.07    0.60 
   2  15   8    6.95    0.94 
   3  15   8    3.64    0.72 
  -3  16   8    0.39    0.52 
  -2  16   8   -0.14    0.47 
  -1  16   8    3.28    0.68 
   0  16   8    2.87    0.96 
   1  16   8    6.98    1.27 
   2  16   8    1.15    0.59 
  -2  17   8    1.54    0.63 
  -1  17   8    2.52    0.66 
   0  17   8    3.73    1.08 
   1  17   8    0.66    0.81 
  -1 -15   9    2.72    1.05 
   0 -15   9    1.94    0.66 
   1 -15   9   -0.41    0.40 
  -2 -14   9    4.64    1.19 
  -1 -14   9    7.70    0.96 
   0 -14   9    1.95    0.61 
   1 -14   9    4.84    0.78 
   2 -14   9    0.30    0.45 
  -3 -13   9   -0.05    0.48 
  -2 -13   9   -0.16    0.59 
  -1 -13   9    0.84    0.52 
   0 -13   9    0.43    0.50 
   1 -13   9    0.23    0.43 
   2 -13   9    3.15    0.65 
   3 -13   9   -0.05    0.67 
  -4 -12   9    2.98    0.71 
  -3 -12   9    0.26    0.46 
  -2 -12   9   10.47    1.63 
  -1 -12   9    4.71    0.76 
   0 -12   9    2.72    0.62 
   1 -12   9   29.89    1.78 
   2 -12   9    0.94    0.48 
   3 -12   9    9.78    1.51 
  -4 -11   9    0.25    0.47 
  -3 -11   9    0.55    0.50 
  -2 -11   9    0.03    0.34 
  -1 -11   9   -0.53    0.35 
   0 -11   9    0.29    0.43 
   1 -11   9   -0.12    0.40 
   2 -11   9   -0.50    0.34 
   3 -11   9    0.66    0.68 
   4 -11   9    0.88    0.77 
  -5 -10   9    1.33    0.60 
  -4 -10   9    3.69    0.75 
  -3 -10   9    0.88    0.50 
  -2 -10   9   16.28    1.05 
  -1 -10   9   10.81    1.04 
   0 -10   9    6.03    0.78 
   1 -10   9   38.15    1.98 
   2 -10   9    1.09    0.47 
   3 -10   9    8.53    1.39 
   4 -10   9    7.61    1.09 
  -5  -9   9    0.05    0.50 
  -4  -9   9   -0.11    0.42 
  -3  -9   9    1.12    0.40 
  -2  -9   9    0.96    0.38 
  -1  -9   9    1.57    0.53 
   0  -9   9    3.38    0.61 
   1  -9   9    2.48    0.58 
   2  -9   9   11.06    1.00 
   3  -9   9   -0.18    0.56 
   4  -9   9    0.83    0.49 
   5  -9   9    0.32    0.49 
  -5  -8   9    1.73    0.63 
  -4  -8   9   12.13    1.21 
  -3  -8   9    0.99    0.39 
  -2  -8   9   23.71    1.24 
  -1  -8   9   -0.41    0.34 
   0  -8   9    5.50    0.75 
   1  -8   9   35.55    1.87 
   2  -8   9    3.61    0.63 
   3  -8   9    8.13    0.89 
   4  -8   9   17.93    1.38 
   5  -8   9    0.26    0.50 
  -5  -7   9   -0.02    0.45 
  -4  -7   9    0.72    0.48 
  -3  -7   9   12.30    0.93 
  -2  -7   9    0.14    0.31 
  -1  -7   9   -0.05    0.28 
   0  -7   9   14.41    1.15 
   1  -7   9   -0.54    0.31 
   2  -7   9    6.85    0.90 
   3  -7   9    3.42    0.62 
   4  -7   9    1.19    0.51 
   5  -7   9    3.42    0.72 
  -6  -6   9   -0.62    0.45 
  -5  -6   9    2.63    0.68 
  -4  -6   9    5.24    0.64 
  -3  -6   9   -0.19    0.28 
  -2  -6   9   10.68    0.84 
  -1  -6   9    3.45    0.49 
   0  -6   9    8.29    0.87 
   1  -6   9    3.25    0.60 
   2  -6   9    3.47    0.59 
   3  -6   9    8.84    0.94 
   4  -6   9    7.78    0.90 
   5  -6   9   -0.28    0.40 
  -6  -5   9    1.25    0.59 
  -5  -5   9    5.68    0.89 
  -4  -5   9    3.49    0.55 
  -3  -5   9   14.03    0.97 
  -2  -5   9    2.85    0.48 
  -1  -5   9   15.56    0.97 
   0  -5   9   18.11    1.27 
   1  -5   9   10.58    0.93 
   2  -5   9    9.99    0.93 
   3  -5   9    8.37    0.88 
   4  -5   9    0.10    0.40 
   5  -5   9    8.75    0.98 
  -6  -4   9    0.44    0.49 
  -5  -4   9    0.72    0.50 
  -4  -4   9    0.09    0.33 
  -3  -4   9    0.39    0.34 
  -2  -4   9    3.76    0.51 
  -1  -4   9    7.54    0.67 
   0  -4   9    0.17    0.32 
   1  -4   9    0.68    0.31 
   2  -4   9    0.97    0.40 
   3  -4   9    4.79    0.70 
   4  -4   9    1.03    0.48 
   5  -4   9    0.48    0.49 
  -6  -3   9    2.58    0.69 
  -5  -3   9    1.17    0.45 
  -4  -3   9    1.65    0.43 
  -3  -3   9   14.73    0.97 
  -2  -3   9    0.92    0.35 
  -1  -3   9   24.86    1.50 
   0  -3   9   31.48    1.67 
   1  -3   9    0.47    0.29 
   2  -3   9   41.18    1.97 
   3  -3   9   14.32    1.12 
   4  -3   9    0.29    0.43 
   5  -3   9    9.28    0.97 
   6  -3   9    1.09    0.52 
  -6  -2   9    0.75    0.54 
  -5  -2   9    0.25    0.36 
  -4  -2   9    0.33    0.35 
  -3  -2   9    0.15    0.37 
  -2  -2   9    0.55    0.39 
  -1  -2   9   -0.08    0.32 
   0  -2   9    5.06    0.52 
   1  -2   9    4.88    0.52 
   2  -2   9    1.09    0.43 
   3  -2   9    0.87    0.42 
   4  -2   9    5.14    0.75 
   5  -2   9    1.27    0.49 
   6  -2   9    0.05    0.44 
  -6  -1   9    5.57    0.77 
  -5  -1   9    1.99    0.48 
  -4  -1   9    0.61    0.45 
  -3  -1   9   11.09    1.02 
  -2  -1   9    4.16    0.68 
  -1  -1   9   11.74    1.00 
   0  -1   9    6.77    0.59 
   1  -1   9    7.51    0.62 
   2  -1   9   21.63    1.33 
   3  -1   9    7.36    0.81 
   4  -1   9   19.15    1.32 
   5  -1   9   20.16    1.41 
   6  -1   9    0.41    0.57 
  -6   0   9    0.31    0.37 
  -5   0   9   -0.04    0.41 
  -4   0   9    0.39    0.42 
  -3   0   9   -0.55    0.32 
  -2   0   9    0.06    0.34 
  -1   0   9   -0.20    0.25 
   0   0   9    0.02    0.24 
   1   0   9   -0.29    0.23 
   2   0   9   -0.19    0.32 
   3   0   9    0.16    0.35 
   4   0   9    0.26    0.39 
   5   0   9   -0.21    0.36 
   6   0   9   -0.18    0.67 
  -6   1   9    4.06    0.78 
  -5   1   9    1.01    0.49 
  -4   1   9    0.98    0.45 
  -3   1   9   10.18    1.00 
  -2   1   9    2.83    0.57 
  -1   1   9   12.02    0.79 
   0   1   9    9.59    0.71 
   1   1   9    7.83    0.79 
   2   1   9   21.60    1.35 
   3   1   9    7.84    0.87 
   4   1   9   16.99    1.26 
   5   1   9   18.21    1.33 
   6   1   9    0.35    0.73 
  -6   2   9    0.36    0.47 
  -5   2   9   -0.10    0.38 
  -4   2   9    0.38    0.41 
  -3   2   9    0.23    0.39 
  -2   2   9    0.61    0.39 
  -1   2   9    0.11    0.27 
   0   2   9    3.79    0.47 
   1   2   9    4.32    0.63 
   2   2   9    1.80    0.48 
   3   2   9    0.81    0.42 
   4   2   9    6.21    0.78 
   5   2   9   -0.18    0.40 
   6   2   9    0.05    0.63 
  -6   3   9    2.91    0.71 
  -5   3   9    0.79    0.49 
  -4   3   9    2.52    0.59 
  -3   3   9   15.39    1.23 
  -2   3   9    0.95    0.34 
  -1   3   9   28.79    1.28 
   0   3   9   32.59    1.35 
   1   3   9    0.53    0.40 
   2   3   9   43.68    2.04 
   3   3   9   16.92    1.22 
   4   3   9    0.46    0.40 
   5   3   9    9.78    1.47 
   6   3   9    0.01    0.71 
  -6   4   9    0.22    0.47 
  -5   4   9    0.23    0.43 
  -4   4   9   -0.29    0.40 
  -3   4   9    0.77    0.46 
  -2   4   9    2.31    0.43 
  -1   4   9    8.48    0.69 
   0   4   9   -0.18    0.25 
   1   4   9    0.19    0.36 
   2   4   9    1.11    0.44 
   3   4   9    3.73    0.63 
   4   4   9    1.62    0.47 
   5   4   9    1.60    0.80 
  -6   5   9    0.60    0.53 
  -5   5   9    6.09    0.87 
  -4   5   9    3.40    0.70 
  -3   5   9   15.02    0.99 
  -2   5   9    2.42    0.43 
  -1   5   9   19.22    1.04 
   0   5   9   19.20    1.03 
   1   5   9    8.06    0.86 
   2   5   9    9.33    0.91 
   3   5   9    8.01    0.84 
   4   5   9    1.18    0.78 
   5   5   9   10.67    1.50 
  -6   6   9   -0.10    0.45 
  -5   6   9    2.62    0.66 
  -4   6   9    5.04    0.79 
  -3   6   9    0.11    0.31 
  -2   6   9    7.70    0.70 
  -1   6   9    2.94    0.45 
   0   6   9    7.44    0.65 
   1   6   9    2.83    0.59 
   2   6   9    1.87    0.55 
   3   6   9   12.56    1.02 
   4   6   9    9.49    1.40 
   5   6   9    0.37    0.65 
  -5   7   9   -0.27    0.41 
  -4   7   9   -0.20    0.37 
  -3   7   9   12.90    0.92 
  -2   7   9    0.89    0.35 
  -1   7   9    0.11    0.29 
   0   7   9   14.19    0.91 
   1   7   9   -0.31    0.36 
   2   7   9    8.68    0.88 
   3   7   9    3.49    0.64 
   4   7   9    0.64    0.70 
   5   7   9    2.05    0.90 
  -5   8   9    0.95    0.54 
  -4   8   9   11.64    0.90 
  -3   8   9    0.84    0.37 
  -2   8   9   22.25    1.18 
  -1   8   9   -0.44    0.27 
   0   8   9    7.16    0.84 
   1   8   9   38.78    1.93 
   2   8   9    3.53    0.62 
   3   8   9    7.68    1.25 
   4   8   9   19.29    2.03 
   5   8   9   -0.19    0.63 
  -5   9   9   -0.58    0.41 
  -4   9   9    0.19    0.35 
  -3   9   9    0.70    0.38 
  -2   9   9    0.79    0.36 
  -1   9   9    1.50    0.41 
   0   9   9    3.85    0.65 
   1   9   9    3.68    0.66 
   2   9   9   13.29    1.11 
   3   9   9    0.42    0.66 
   4   9   9    0.20    0.67 
   5   9   9    0.38    0.72 
  -5  10   9    0.83    0.48 
  -4  10   9    3.57    0.59 
  -3  10   9    0.11    0.34 
  -2  10   9   16.19    1.04 
  -1  10   9   10.52    0.83 
   0  10   9    6.40    0.82 
   1  10   9   38.95    2.01 
   2  10   9    2.13    0.59 
   3  10   9    9.59    1.50 
   4  10   9    7.25    1.30 
  -4  11   9    0.03    0.37 
  -3  11   9    0.21    0.35 
  -2  11   9   -0.14    0.31 
  -1  11   9    0.13    0.32 
   0  11   9    0.68    0.46 
   1  11   9    0.65    0.44 
   2  11   9   -0.61    0.55 
   3  11   9    0.76    0.66 
   4  11   9   -0.29    0.63 
  -4  12   9    1.96    0.49 
  -3  12   9   -0.08    0.35 
  -2  12   9    7.19    0.74 
  -1  12   9    5.82    0.63 
   0  12   9    2.45    0.63 
   1  12   9   36.13    1.93 
   2  12   9    1.23    0.76 
   3  12   9    9.29    1.43 
  -3  13   9   -0.16    0.45 
  -2  13   9    0.03    0.44 
  -1  13   9    0.79    0.48 
   0  13   9    0.32    0.47 
   1  13   9   -0.38    0.56 
   2  13   9    2.91    1.00 
   3  13   9   -0.81    0.59 
  -3  14   9   -0.35    0.65 
  -2  14   9    2.77    0.70 
  -1  14   9    6.53    0.92 
   0  14   9    1.83    0.60 
   1  14   9    7.32    1.32 
   2  14   9    0.46    0.79 
  -1  15   9    2.40    0.64 
   0  15   9    1.56    0.64 
   1  15   9   -0.15    0.67 
  -2 -12  10   -0.19    0.66 
  -1 -12  10   -0.42    0.43 
   0 -12  10    0.81    0.53 
   1 -12  10   -0.05    0.47 
  -2 -11  10    0.50    0.53 
  -1 -11  10    6.26    0.87 
   0 -11  10   11.76    1.17 
   1 -11  10   -0.07    0.49 
   2 -11  10   10.73    1.58 
  -3 -10  10   -0.17    0.46 
  -2 -10  10    4.80    0.79 
  -1 -10  10    0.38    0.48 
   0 -10  10    0.06    0.43 
   1 -10  10    3.70    0.70 
   2 -10  10   -0.81    0.51 
   3 -10  10   -0.28    0.60 
  -3  -9  10    2.43    0.54 
  -2  -9  10    0.07    0.43 
  -1  -9  10    6.62    0.89 
   0  -9  10   18.60    1.39 
   1  -9  10    0.39    0.43 
   2  -9  10    3.24    0.97 
   3  -9  10    0.87    0.74 
  -4  -8  10    0.26    0.48 
  -3  -8  10    1.29    0.45 
  -2  -8  10    2.99    0.66 
  -1  -8  10    2.23    0.60 
   0  -8  10    5.98    0.83 
   1  -8  10    4.26    0.71 
   2  -8  10   -0.23    0.58 
   3  -8  10    4.37    1.15 
  -4  -7  10    2.63    0.73 
  -3  -7  10    2.33    0.51 
  -2  -7  10    0.76    0.38 
  -1  -7  10    3.80    0.68 
   0  -7  10    4.72    0.72 
   1  -7  10    1.96    0.53 
   2  -7  10   20.15    2.04 
   3  -7  10    6.21    1.26 
   4  -7  10    1.87    0.60 
  -4  -6  10    6.36    0.74 
  -3  -6  10    1.70    0.48 
  -2  -6  10    1.45    0.43 
  -1  -6  10    0.94    0.51 
   0  -6  10    0.12    0.40 
   1  -6  10    4.96    0.71 
   2  -6  10    0.07    0.60 
   3  -6  10    6.23    0.88 
   4  -6  10    1.92    0.60 
  -5  -5  10    0.36    0.51 
  -4  -5  10    0.23    0.35 
  -3  -5  10    2.93    0.53 
  -2  -5  10    0.15    0.34 
  -1  -5  10    7.80    0.93 
   0  -5  10    1.05    0.48 
   1  -5  10    6.45    0.78 
   2  -5  10   12.07    1.62 
   3  -5  10    0.20    0.44 
   4  -5  10    5.70    0.84 
  -5  -4  10    2.65    0.72 
  -4  -4  10    1.27    0.47 
  -3  -4  10   -0.01    0.33 
  -2  -4  10    8.23    0.77 
  -1  -4  10    0.38    0.41 
   0  -4  10    2.28    0.57 
   1  -4  10   14.93    1.27 
   2  -4  10    0.47    0.44 
   3  -4  10    7.51    0.90 
   4  -4  10    8.25    0.95 
  -5  -3  10    0.45    0.41 
  -4  -3  10    0.09    0.37 
  -3  -3  10    2.08    0.48 
  -2  -3  10    0.80    0.36 
  -1  -3  10    6.21    0.67 
   0  -3  10    1.64    0.49 
   1  -3  10    3.26    0.89 
   2  -3  10    3.04    0.61 
   3  -3  10   -0.16    0.42 
   4  -3  10    1.91    0.58 
  -5  -2  10    1.39    0.50 
  -4  -2  10    3.83    0.61 
  -3  -2  10    1.25    0.52 
  -2  -2  10    9.98    1.03 
  -1  -2  10    6.06    0.81 
   0  -2  10   19.06    1.33 
   1  -2  10   22.98    1.44 
   2  -2  10    0.29    0.40 
   3  -2  10   17.02    1.31 
   4  -2  10   10.45    1.05 
   5  -2  10    0.21    0.48 
  -5  -1  10    0.39    0.42 
  -4  -1  10    0.04    0.42 
  -3  -1  10    0.95    0.50 
  -2  -1  10    0.32    0.40 
  -1  -1  10    1.99    0.55 
   0  -1  10    0.58    0.40 
   1  -1  10    0.24    0.37 
   2  -1  10    1.91    0.53 
   3  -1  10    1.91    0.56 
   4  -1  10   -0.28    0.40 
   5  -1  10    0.09    0.45 
  -5   0  10    4.65    0.82 
  -4   0  10    1.11    0.54 
  -3   0  10    0.03    0.39 
  -2   0  10   20.48    2.04 
  -1   0  10    3.79    0.67 
   0   0  10   15.43    0.94 
   1   0  10   14.23    1.15 
   2   0  10    0.67    0.43 
   3   0  10   23.60    1.51 
   4   0  10    8.59    0.96 
   5   0  10    2.63    0.66 
  -5   1  10   -0.30    0.42 
  -4   1  10    0.15    0.45 
  -3   1  10    1.32    0.52 
  -2   1  10    0.28    0.39 
  -1   1  10    2.54    0.59 
   0   1  10    0.24    0.30 
   1   1  10   -0.20    0.36 
   2   1  10    1.11    0.48 
   3   1  10    1.54    0.52 
   4   1  10   -0.17    0.39 
   5   1  10    0.59    0.52 
  -5   2  10    1.87    0.61 
  -4   2  10    2.86    0.66 
  -3   2  10    0.95    0.49 
  -2   2  10   11.97    1.09 
  -1   2  10    4.79    0.65 
   0   2  10   20.81    1.13 
   1   2  10   25.61    1.58 
   2   2  10   -0.02    0.39 
   3   2  10   16.32    1.25 
   4   2  10   10.10    1.04 
   5   2  10    0.46    0.68 
  -5   3  10   -0.19    0.42 
  -4   3  10    0.02    0.42 
  -3   3  10    2.30    0.61 
  -2   3  10    0.75    0.43 
  -1   3  10    6.28    0.65 
   0   3  10    1.87    0.42 
   1   3  10    5.95    0.81 
   2   3  10    1.77    0.54 
   3   3  10   -0.12    0.38 
   4   3  10    2.42    0.57 
  -5   4  10    3.47    0.75 
  -4   4  10    1.06    0.55 
  -3   4  10   -0.01    0.39 
  -2   4  10    9.12    0.97 
  -1   4  10    0.05    0.31 
   0   4  10    1.97    0.56 
   1   4  10   14.57    1.17 
   2   4  10   -0.22    0.34 
   3   4  10    7.93    0.91 
   4   4  10    6.84    0.87 
  -5   5  10    0.52    0.53 
  -4   5  10   -0.63    0.39 
  -3   5  10    2.51    0.64 
  -2   5  10   -0.02    0.34 
  -1   5  10    6.57    0.67 
   0   5  10    0.85    0.46 
   1   5  10    8.84    0.98 
   2   5  10   10.01    1.01 
   3   5  10   -0.22    0.38 
   4   5  10    4.41    1.08 
  -4   6  10    4.79    0.81 
  -3   6  10    1.70    0.58 
  -2   6  10    1.73    0.43 
  -1   6  10    0.43    0.34 
   0   6  10    0.67    0.45 
   1   6  10    5.03    0.78 
   2   6  10   -0.13    0.40 
   3   6  10    5.15    0.77 
   4   6  10    2.25    0.87 
  -4   7  10    2.80    0.72 
  -3   7  10    2.86    0.52 
  -2   7  10    1.19    0.43 
  -1   7  10    4.85    0.59 
   0   7  10    3.35    0.66 
   1   7  10    2.13    0.56 
   2   7  10   16.03    1.28 
   3   7  10    7.84    0.92 
   4   7  10    2.04    0.88 
  -4   8  10    0.54    0.54 
  -3   8  10    1.58    0.47 
  -2   8  10    1.91    0.50 
  -1   8  10    2.05    0.47 
   0   8  10    4.54    0.77 
   1   8  10    4.59    0.76 
   2   8  10    0.61    0.47 
   3   8  10    4.04    1.10 
  -4   9  10    1.69    0.69 
  -3   9  10    1.29    0.48 
  -2   9  10   -0.37    0.31 
  -1   9  10    8.35    0.79 
   0   9  10   17.39    1.36 
   1   9  10    0.27    0.43 
   2   9  10    4.25    0.72 
   3   9  10    0.88    0.68 
  -3  10  10   -0.12    0.38 
  -2  10  10    5.17    0.69 
  -1  10  10   -0.20    0.42 
   0  10  10   -0.22    0.44 
   1  10  10    3.77    0.75 
   2  10  10    0.98    0.79 
   3  10  10    1.16    0.82 
  -3  11  10    6.02    1.33 
  -2  11  10    0.02    0.38 
  -1  11  10    8.46    1.03 
   0  11  10   13.98    1.25 
   1  11  10    1.00    0.52 
   2  11  10   10.98    1.60 
  -2  12  10   -0.40    0.34 
  -1  12  10   -0.33    0.44 
   0  12  10   -0.10    0.46 
   1  12  10    0.22    0.51 
   0  13  10    1.39    0.85 
  -1  -9  11    1.02    0.78 
   0  -9  11    0.81    0.52 
  -2  -8  11    4.24    0.80 
  -1  -8  11   -0.20    0.46 
   0  -8  11    2.84    0.68 
   1  -8  11    4.16    1.14 
  -2  -7  11    0.66    0.55 
  -1  -7  11    4.00    0.76 
   0  -7  11    0.37    0.47 
   1  -7  11    0.01    0.69 
   2  -7  11    1.99    0.85 
  -3  -6  11    2.89    0.58 
  -2  -6  11    2.77    0.68 
  -1  -6  11    1.04    0.55 
   0  -6  11    5.54    0.85 
   1  -6  11    7.95    1.46 
   2  -6  11   -0.17    0.64 
  -3  -5  11    0.67    0.43 
  -2  -5  11    0.61    0.51 
  -1  -5  11    3.74    0.73 
   0  -5  11    4.07    0.73 
   1  -5  11   -0.19    0.56 
   2  -5  11    2.83    0.98 
  -3  -4  11   -0.39    0.37 
  -2  -4  11    1.19    0.55 
  -1  -4  11   -0.36    0.37 
   0  -4  11    4.32    0.74 
   1  -4  11    6.16    1.27 
   2  -4  11    1.92    0.83 
   3  -4  11    0.66    0.54 
  -3  -3  11    1.54    0.50 
  -2  -3  11    0.11    0.34 
  -1  -3  11    9.34    1.05 
   0  -3  11    5.63    0.79 
   1  -3  11    4.22    1.11 
   2  -3  11    9.81    1.50 
   3  -3  11    0.38    0.48 
  -3  -2  11   -0.10    0.36 
  -2  -2  11    0.48    0.39 
  -1  -2  11   -0.09    0.39 
   0  -2  11    0.30    0.40 
   1  -2  11    2.05    0.86 
   2  -2  11    0.23    0.43 
   3  -2  11    1.35    0.58 
  -3  -1  11    8.48    1.09 
  -2  -1  11    0.17    0.45 
  -1  -1  11    8.49    1.01 
   0  -1  11    3.84    1.06 
   1  -1  11    5.07    1.14 
   2  -1  11   21.85    1.54 
   3  -1  11   -0.27    0.44 
  -3   0  11   -0.44    0.41 
  -2   0  11    0.35    0.42 
  -1   0  11   -0.10    0.40 
   0   0  11    0.61    0.65 
   1   0  11   -0.05    0.40 
   2   0  11    0.09    0.41 
   3   0  11   -0.80    0.36 
  -3   1  11    8.20    1.02 
  -2   1  11   -0.15    0.41 
  -1   1  11    6.69    0.89 
   0   1  11    1.80    0.82 
   1   1  11    5.85    0.83 
   2   1  11   24.43    1.60 
   3   1  11   -0.03    0.42 
  -3   2  11    0.26    0.49 
  -2   2  11   -0.68    0.37 
  -1   2  11    0.87    0.48 
   0   2  11   -0.50    0.53 
   1   2  11    1.93    0.58 
   2   2  11   -0.18    0.43 
   3   2  11    1.66    0.58 
  -3   3  11    2.10    0.63 
  -2   3  11   -0.17    0.40 
  -1   3  11   12.00    1.15 
   0   3  11    6.27    0.82 
   1   3  11    5.87    0.80 
   2   3  11   12.65    1.20 
   3   3  11    0.30    0.49 
  -3   4  11    0.13    0.52 
  -2   4  11    0.03    0.47 
  -1   4  11    0.03    0.44 
   0   4  11    2.57    0.62 
   1   4  11    8.22    0.96 
   2   4  11    0.11    0.46 
   3   4  11    0.56    0.53 
  -3   5  11    0.97    0.57 
  -2   5  11    1.21    0.53 
  -1   5  11    3.67    0.57 
   0   5  11    3.89    0.73 
   1   5  11    0.91    0.51 
   2   5  11    3.51    0.69 
  -3   6  11    2.71    0.78 
  -2   6  11    1.98    0.64 
  -1   6  11   -0.09    0.45 
   0   6  11    4.95    0.79 
   1   6  11    8.66    1.03 
   2   6  11    0.70    0.52 
  -2   7  11    0.37    0.41 
  -1   7  11    4.41    0.81 
   0   7  11    0.03    0.49 
   1   7  11    0.25    0.46 
   2   7  11    2.67    0.65 
  -2   8  11    4.27    0.65 
  -1   8  11    0.52    0.50 
   0   8  11    3.34    0.73 
   1   8  11    4.28    0.80 
  -1   9  11    2.86    0.70 
   0   9  11    0.49    0.51 
   0   0   0    0.00    0.00 
; 
_shelx_hkl_checksum   52437 
  
